# Supplementary material
Source: PubMed Central journal article supplement (PMC4855076)
Supplement: onc2015280x2.pdf [file onc2015280x2.pdf]

**Supplementary Table 1.** List of differentially expressed genes identified at three days after the start of ETC-159 treatment of colorectal tumors. Log2 fold-changes between untreated (vehicle, VEH) and ETC-159 treated (ETC) tumors are reported. Changes in gene expression were considered significant if the Benjamini-Hochberg adjusted P-value <0.0001 (see Methods for details on the RNAseq and differential expression analysis). (A) Genes significantly down-regulated after ETC-169 treatment; (B) genes significantly up-regulated after ETC-169 treatment. Each table is sorted according to the significance of differential expression (BH adjusted P-value).

(A) Genes down-regulated after ETC-159 treatment

| Gene symbol | ENSEMBL gene ID | Gene description                                                             | log2 fold change (VEH/ETC) | BH-adjusted P-value |
|-------------|-----------------|------------------------------------------------------------------------------|----------------------------|---------------------|
| RRM2        | ENSG00000171848 | ribonucleotide reductase M2 [Source:HGNC Symbol;Acc:10452]                   | 4.93                       | 1.2E-162            |
| MKI67       | ENSG00000148773 | marker of proliferation Ki-67 [Source:HGNC Symbol;Acc:7107]                  | 4.35                       | 1.0E-142            |
| CLDN2       | ENSG00000165376 | claudin 2 [Source:HGNC Symbol;Acc:2041]                                      | 5.03                       | 2.3E-130            |
| CCNB1       | ENSG00000134057 | cyclin B1 [Source:HGNC Symbol;Acc:1579]                                      | 3.99                       | 5.3E-129            |
| MCM4        | ENSG00000104738 | minichromosome maintenance complex component 4 [Source:HGNC Symbol;Acc:6947] | 3.03                       | 1.4E-128            |
| CDCA7       | ENSG00000144354 | cell division cycle associated 7 [Source:HGNC Symbol;Acc:14628]              | 5.74                       | 9.6E-117            |
| FOXM1       | ENSG00000111206 | forkhead box M1 [Source:HGNC Symbol;Acc:3818]                                | 4.39                       | 1.8E-112            |
| UBE2C       | ENSG00000175063 | ubiquitin-conjugating enzyme E2C [Source:HGNC Symbol;Acc:15937]              | 3.99                       | 5.3E-106            |
| TOP2A       | ENSG00000131747 | topoisomerase (DNA) II alpha 170kDa [Source:HGNC Symbol;Acc:11989]           | 4.90                       | 1.0E-104            |
| MCM6        | ENSG00000076003 | minichromosome maintenance complex component 6 [Source:HGNC Symbol;Acc:6949] | 4.19                       | 7.6E-100            |
| STMN1       | ENSG00000117632 | stathmin 1 [Source:HGNC Symbol;Acc:6510]                                     | 4.22                       | 2.3E-96             |
| CDCA5       | ENSG00000146670 | cell division cycle associated 5 [Source:HGNC Symbol;Acc:14626]              | 4.82                       | 4.5E-95             |
| PRC1        | ENSG00000198901 | protein regulator of cytokinesis 1 [Source:HGNC Symbol;Acc:9341]             | 3.16                       | 4.0E-94             |
| NUSAP1      | ENSG00000137804 | nucleolar and spindle associated protein 1 [Source:HGNC Symbol;Acc:18538]    | 4.40                       | 5.2E-94             |
| ALDH1B1     | ENSG00000137124 | aldehyde dehydrogenase 1 family, member B1 [Source:HGNC Symbol;Acc:407]      | 4.20                       | 1.0E-91             |

|           |                 |                                                                                                     |      |         |
|-----------|-----------------|-----------------------------------------------------------------------------------------------------|------|---------|
| CENPF     | ENSG00000117724 | centromere protein F, 350/400kDa [Source:HGNC Symbol;Acc:1857]                                      | 4.69 | 1.1E-87 |
| TTK       | ENSG00000112742 | TTK protein kinase [Source:HGNC Symbol;Acc:12401]                                                   | 4.54 | 3.1E-87 |
| ZWINT     | ENSG00000122952 | ZW10 interacting kinetochore protein [Source:HGNC Symbol;Acc:13195]                                 | 3.12 | 1.0E-86 |
| HMMR      | ENSG00000072571 | hyaluronan-mediated motility receptor (RHAMM) [Source:HGNC Symbol;Acc:5012]                         | 4.27 | 1.5E-84 |
| MCM3      | ENSG00000112118 | minichromosome maintenance complex component 3 [Source:HGNC Symbol;Acc:6945]                        | 2.97 | 3.6E-84 |
| KIF4A     | ENSG00000090889 | kinesin family member 4A [Source:HGNC Symbol;Acc:13339]                                             | 4.02 | 1.0E-83 |
| UHRF1     | ENSG00000034063 | ubiquitin-like with PHD and ring finger domains 1 [Source:HGNC Symbol;Acc:12556]                    | 3.64 | 1.1E-83 |
| FAM111B   | ENSG00000189057 | family with sequence similarity 111, member B [Source:HGNC Symbol;Acc:24200]                        | 5.54 | 4.1E-83 |
| LMNB1     | ENSG00000113368 | lamin B1 [Source:HGNC Symbol;Acc:6637]                                                              | 4.91 | 7.9E-83 |
| NEK2      | ENSG00000117650 | NIMA-related kinase 2 [Source:HGNC Symbol;Acc:7745]                                                 | 4.21 | 7.9E-83 |
| BIRC5     | ENSG00000089685 | baculoviral IAP repeat containing 5 [Source:HGNC Symbol;Acc:593]                                    | 4.72 | 9.3E-83 |
| ARHGAP11A | ENSG00000198826 | Rho GTPase activating protein 11A [Source:HGNC Symbol;Acc:15783]                                    | 5.13 | 2.4E-82 |
| FEN1      | ENSG00000168496 | flap structure-specific endonuclease 1 [Source:HGNC Symbol;Acc:3650]                                | 2.73 | 1.5E-81 |
| CDK1      | ENSG00000170312 | cyclin-dependent kinase 1 [Source:HGNC Symbol;Acc:1722]                                             | 3.99 | 3.1E-81 |
| ASPM      | ENSG00000066279 | asp (abnormal spindle) homolog, microcephaly associated (Drosophila) [Source:HGNC Symbol;Acc:19048] | 4.31 | 5.1E-81 |
| ASCL2     | ENSG00000183734 | achaete-scute family bHLH transcription factor 2 [Source:HGNC Symbol;Acc:739]                       | 7.50 | 9.4E-81 |
| KNTC1     | ENSG00000184445 | kinetochore associated 1 [Source:HGNC Symbol;Acc:17255]                                             | 3.09 | 1.3E-80 |
| KIF11     | ENSG00000138160 | kinesin family member 11 [Source:HGNC Symbol;Acc:6388]                                              | 4.36 | 3.2E-80 |
| MCM2      | ENSG00000073111 | minichromosome maintenance complex component 2 [Source:HGNC Symbol;Acc:6944]                        | 3.81 | 2.9E-79 |
| --        | ENSG00000268310 | Uncharacterized protein [Source:UniProtKB/TrEMBL;Acc:M0R3F9]                                        | 5.04 | 2.2E-78 |

|          |                 |                                                                                                                                                                       |      |         |
|----------|-----------------|-----------------------------------------------------------------------------------------------------------------------------------------------------------------------|------|---------|
| KIAA1324 | ENSG00000116299 | KIAA1324 [Source:HGNC Symbol;Acc:29618]                                                                                                                               | 3.71 | 1.1E-77 |
| CDKN3    | ENSG00000100526 | cyclin-dependent kinase inhibitor 3 [Source:HGNC Symbol;Acc:1791]                                                                                                     | 3.58 | 1.5E-77 |
| GIN51    | ENSG00000101003 | GIN5 complex subunit 1 (Psf1 homolog) [Source:HGNC Symbol;Acc:28980]                                                                                                  | 3.90 | 3.1E-77 |
| TPX2     | ENSG00000088325 | TPX2, microtubule-associated [Source:HGNC Symbol;Acc:1249]                                                                                                            | 3.07 | 3.7E-77 |
| SAPCD2   | ENSG00000186193 | suppressor APC domain containing 2 [Source:HGNC Symbol;Acc:28055]                                                                                                     | 3.52 | 8.9E-76 |
| LDHB     | ENSG00000111716 | lactate dehydrogenase B [Source:HGNC Symbol;Acc:6541]                                                                                                                 | 2.76 | 1.5E-75 |
| LRIG1    | ENSG00000144749 | leucine-rich repeats and immunoglobulin-like domains 1 [Source:HGNC Symbol;Acc:17360]                                                                                 | 2.56 | 2.2E-75 |
| CENPU    | ENSG00000151725 | centromere protein U [Source:HGNC Symbol;Acc:21348]                                                                                                                   | 3.62 | 1.1E-74 |
| HELLS    | ENSG00000119969 | helicase, lymphoid-specific [Source:HGNC Symbol;Acc:4861]                                                                                                             | 5.08 | 1.1E-74 |
| HJURP    | ENSG00000123485 | Holliday junction recognition protein [Source:HGNC Symbol;Acc:25444]                                                                                                  | 4.74 | 1.1E-74 |
| KIF2C    | ENSG00000142945 | kinesin family member 2C [Source:HGNC Symbol;Acc:6393]                                                                                                                | 4.57 | 7.8E-74 |
| MTHFD1   | ENSG00000100714 | methylenetetrahydrofolate dehydrogenase (NADP+ dependent) 1, methenyltetrahydrofolate cyclohydrolase, formyltetrahydrofolate synthetase [Source:HGNC Symbol;Acc:7432] | 2.98 | 4.3E-73 |
| NCAPH    | ENSG00000121152 | non-SMC condensin I complex, subunit H [Source:HGNC Symbol;Acc:1112]                                                                                                  | 4.52 | 5.5E-73 |
| AURKB    | ENSG00000178999 | aurora kinase B [Source:HGNC Symbol;Acc:11390]                                                                                                                        | 5.23 | 1.7E-72 |
| KIF23    | ENSG00000137807 | kinesin family member 23 [Source:HGNC Symbol;Acc:6392]                                                                                                                | 4.29 | 5.7E-72 |
| HMGB2    | ENSG00000164104 | high mobility group box 2 [Source:HGNC Symbol;Acc:5000]                                                                                                               | 3.72 | 5.8E-71 |
| KIF20A   | ENSG00000112984 | kinesin family member 20A [Source:HGNC Symbol;Acc:9787]                                                                                                               | 4.53 | 2.4E-70 |
| RGMB     | ENSG00000174136 | repulsive guidance molecule family member b [Source:HGNC Symbol;Acc:26896]                                                                                            | 2.94 | 1.2E-69 |
| TROAP    | ENSG00000135451 | trophinin associated protein [Source:HGNC Symbol;Acc:12327]                                                                                                           | 4.08 | 1.5E-69 |
| CCNB2    | ENSG00000157456 | cyclin B2 [Source:HGNC Symbol;Acc:1580]                                                                                                                               | 3.62 | 2.5E-67 |
| PARP1    | ENSG00000143799 | poly (ADP-ribose) polymerase 1 [Source:HGNC Symbol;Acc:270]                                                                                                           | 3.28 | 8.0E-67 |

|         |                 |                                                                                        |      |         |
|---------|-----------------|----------------------------------------------------------------------------------------|------|---------|
| MAD2L1  | ENSG00000164109 | MAD2 mitotic arrest deficient-like 1 (yeast) [Source:HGNC Symbol;Acc:6763]             | 4.86 | 2.8E-65 |
| MSH2    | ENSG00000095002 | mutS homolog 2 [Source:HGNC Symbol;Acc:7325]                                           | 3.61 | 3.9E-65 |
| POLQ    | ENSG00000051341 | polymerase (DNA directed), theta [Source:HGNC Symbol;Acc:9186]                         | 5.00 | 6.1E-65 |
| BUB1    | ENSG00000169679 | BUB1 mitotic checkpoint serine/threonine kinase [Source:HGNC Symbol;Acc:1148]          | 4.08 | 2.7E-63 |
| NCAPD3  | ENSG00000151503 | non-SMC condensin II complex, subunit D3 [Source:HGNC Symbol;Acc:28952]                | 2.59 | 1.1E-62 |
| CEP55   | ENSG00000138180 | centrosomal protein 55kDa [Source:HGNC Symbol;Acc:1161]                                | 3.72 | 1.4E-62 |
| ASF1B   | ENSG00000105011 | anti-silencing function 1B histone chaperone [Source:HGNC Symbol;Acc:20996]            | 3.88 | 1.8E-62 |
| SPAG5   | ENSG00000076382 | sperm associated antigen 5 [Source:HGNC Symbol;Acc:13452]                              | 3.08 | 2.5E-62 |
| CIT     | ENSG00000122966 | citron (rho-interacting, serine/threonine kinase 21) [Source:HGNC Symbol;Acc:1985]     | 4.12 | 6.2E-62 |
| FAM83D  | ENSG00000101447 | family with sequence similarity 83, member D [Source:HGNC Symbol;Acc:16122]            | 3.55 | 7.6E-62 |
| KIFC1   | ENSG00000237649 | kinesin family member C1 [Source:HGNC Symbol;Acc:6389]                                 | 3.78 | 1.2E-61 |
| CKS2    | ENSG00000123975 | CDC28 protein kinase regulatory subunit 2 [Source:HGNC Symbol;Acc:2000]                | 2.78 | 2.8E-61 |
| MYBL2   | ENSG00000101057 | v-myb avian myeloblastosis viral oncogene homolog-like 2 [Source:HGNC Symbol;Acc:7548] | 4.11 | 4.1E-61 |
| DUT     | ENSG00000128951 | deoxyuridine triphosphatase [Source:HGNC Symbol;Acc:3078]                              | 3.41 | 5.6E-61 |
| RACGAP1 | ENSG00000161800 | Rac GTPase activating protein 1 [Source:HGNC Symbol;Acc:9804]                          | 2.84 | 8.6E-61 |
| RFC3    | ENSG00000133119 | replication factor C (activator 1) 3, 38kDa [Source:HGNC Symbol;Acc:9971]              | 4.60 | 3.0E-60 |
| AURKA   | ENSG00000087586 | aurora kinase A [Source:HGNC Symbol;Acc:11393]                                         | 2.53 | 3.1E-60 |
| HOXB9   | ENSG00000170689 | homeobox B9 [Source:HGNC Symbol;Acc:5120]                                              | 2.62 | 3.8E-60 |
| PBK     | ENSG00000168078 | PDZ binding kinase [Source:HGNC Symbol;Acc:18282]                                      | 5.06 | 4.0E-60 |
| AHCY    | ENSG00000101444 | adenosylhomocysteinase [Source:HGNC Symbol;Acc:343]                                    | 2.31 | 4.3E-60 |

|           |                 |                                                                                        |      |         |
|-----------|-----------------|----------------------------------------------------------------------------------------|------|---------|
| ALDH7A1   | ENSG00000164904 | aldehyde dehydrogenase 7 family, member A1 [Source:HGNC Symbol;Acc:877]                | 2.98 | 7.4E-60 |
| PSRC1     | ENSG00000134222 | proline/serine-rich coiled-coil 1 [Source:HGNC Symbol;Acc:24472]                       | 4.31 | 1.2E-59 |
| NCAPG     | ENSG00000109805 | non-SMC condensin I complex, subunit G [Source:HGNC Symbol;Acc:24304]                  | 3.45 | 1.8E-59 |
| ANLN      | ENSG00000011426 | anillin, actin binding protein [Source:HGNC Symbol;Acc:14082]                          | 3.50 | 2.2E-59 |
| CDC20     | ENSG00000117399 | cell division cycle 20 [Source:HGNC Symbol;Acc:1723]                                   | 4.06 | 3.3E-59 |
| KPNA2     | ENSG00000182481 | karyopherin alpha 2 (RAG cohort 1, importin alpha 1) [Source:HGNC Symbol;Acc:6395]     | 2.41 | 6.8E-59 |
| NPM3      | ENSG00000107833 | nucleophosmin/nucleoplasmin 3 [Source:HGNC Symbol;Acc:7931]                            | 3.05 | 1.9E-58 |
| LINC00261 | ENSG00000259974 | long intergenic non-protein coding RNA 261 [Source:HGNC Symbol;Acc:16189]              | 3.67 | 5.7E-58 |
| GYLTL1B   | ENSG00000165905 | glycosyltransferase-like 1B [Source:HGNC Symbol;Acc:16522]                             | 4.53 | 8.7E-58 |
| C1QBP     | ENSG00000108561 | complement component 1, q subcomponent binding protein [Source:HGNC Symbol;Acc:1243]   | 2.39 | 9.1E-58 |
| NDC80     | ENSG00000080986 | NDC80 kinetochore complex component [Source:HGNC Symbol;Acc:16909]                     | 4.14 | 9.4E-58 |
| BRCA1     | ENSG00000012048 | breast cancer 1, early onset [Source:HGNC Symbol;Acc:1100]                             | 4.09 | 1.0E-57 |
| APEX1     | ENSG00000100823 | APEX nuclease (multifunctional DNA repair enzyme) 1 [Source:HGNC Symbol;Acc:587]       | 2.21 | 2.1E-57 |
| PTPLAD1   | ENSG00000074696 | protein tyrosine phosphatase-like A domain containing 1 [Source:HGNC Symbol;Acc:24175] | 2.56 | 4.2E-57 |
| NUF2      | ENSG00000143228 | NUF2, NDC80 kinetochore complex component [Source:HGNC Symbol;Acc:14621]               | 4.45 | 5.5E-57 |
| CCNA2     | ENSG00000145386 | cyclin A2 [Source:HGNC Symbol;Acc:1578]                                                | 3.45 | 6.8E-57 |
| KIF18B    | ENSG00000186185 | kinesin family member 18B [Source:HGNC Symbol;Acc:27102]                               | 4.61 | 1.5E-56 |
| DLGAP5    | ENSG00000126787 | discs, large (Drosophila) homolog-associated protein 5 [Source:HGNC Symbol;Acc:16864]  | 4.13 | 2.3E-56 |

|          |                 |                                                                                                                                    |      |         |
|----------|-----------------|------------------------------------------------------------------------------------------------------------------------------------|------|---------|
| NASP     | ENSG00000132780 | nuclear autoantigenic sperm protein (histone-binding) [Source:HGNC Symbol;Acc:7644]                                                | 2.21 | 2.3E-56 |
| SKP2     | ENSG00000145604 | S-phase kinase-associated protein 2, E3 ubiquitin protein ligase [Source:HGNC Symbol;Acc:10901]                                    | 3.98 | 4.2E-56 |
| WHSC1    | ENSG00000109685 | Wolf-Hirschhorn syndrome candidate 1 [Source:HGNC Symbol;Acc:12766]                                                                | 2.04 | 2.2E-55 |
| CENPW    | ENSG00000203760 | centromere protein W [Source:HGNC Symbol;Acc:21488]                                                                                | 3.47 | 2.4E-55 |
| HMG2     | ENSG00000198830 | high mobility group nucleosomal binding domain 2 [Source:HGNC Symbol;Acc:4986]                                                     | 2.06 | 3.5E-55 |
| ERCC6L   | ENSG00000186871 | excision repair cross-complementing rodent repair deficiency, complementation group 6-like [Source:HGNC Symbol;Acc:20794]          | 4.81 | 6.6E-55 |
| GINS2    | ENSG00000131153 | GINS complex subunit 2 (Psf2 homolog) [Source:HGNC Symbol;Acc:24575]                                                               | 5.06 | 1.9E-54 |
| UNG      | ENSG00000076248 | uracil-DNA glycosylase [Source:HGNC Symbol;Acc:12572]                                                                              | 3.00 | 2.7E-54 |
| RAD51AP1 | ENSG00000111247 | RAD51 associated protein 1 [Source:HGNC Symbol;Acc:16956]                                                                          | 4.64 | 4.3E-54 |
| PLEKHB1  | ENSG00000021300 | pleckstrin homology domain containing, family B (evectins) member 1 [Source:HGNC Symbol;Acc:19079]                                 | 4.36 | 5.3E-54 |
| ATAD2    | ENSG00000156802 | ATPase family, AAA domain containing 2 [Source:HGNC Symbol;Acc:30123]                                                              | 2.92 | 1.4E-53 |
| CHEK1    | ENSG00000149554 | checkpoint kinase 1 [Source:HGNC Symbol;Acc:1925]                                                                                  | 3.00 | 2.9E-53 |
| PAICS    | ENSG00000128050 | phosphoribosylaminoimidazole carboxylase, phosphoribosylaminoimidazole succinocarboxamide synthetase [Source:HGNC Symbol;Acc:8587] | 2.89 | 1.7E-52 |
| PARPBP   | ENSG00000185480 | PARP1 binding protein [Source:HGNC Symbol;Acc:26074]                                                                               | 4.16 | 3.7E-52 |
| ST6GAL1  | ENSG00000073849 | ST6 beta-galactosamide alpha-2,6-sialyltransferase 1 [Source:HGNC Symbol;Acc:10860]                                                | 5.02 | 4.0E-52 |
| UBE2T    | ENSG00000077152 | ubiquitin-conjugating enzyme E2T (putative) [Source:HGNC Symbol;Acc:25009]                                                         | 3.93 | 4.4E-52 |

|          |                 |                                                                                                           |      |         |
|----------|-----------------|-----------------------------------------------------------------------------------------------------------|------|---------|
| SLC43A1  | ENSG00000149150 | solute carrier family 43 (amino acid system L transporter), member 1 [Source:HGNC Symbol;Acc:9225]        | 5.78 | 6.6E-52 |
| KIF14    | ENSG00000118193 | kinesin family member 14 [Source:HGNC Symbol;Acc:19181]                                                   | 4.36 | 8.5E-52 |
| NAT10    | ENSG00000135372 | N-acetyltransferase 10 (GCN5-related) [Source:HGNC Symbol;Acc:29830]                                      | 2.16 | 1.4E-51 |
| DKC1     | ENSG00000130826 | dyskeratosis congenita 1, dyskerin [Source:HGNC Symbol;Acc:2890]                                          | 2.21 | 1.4E-51 |
| SLC12A2  | ENSG00000064651 | solute carrier family 12 (sodium/potassium/chloride transporter), member 2 [Source:HGNC Symbol;Acc:10911] | 3.67 | 1.8E-51 |
| KIF22    | ENSG00000079616 | kinesin family member 22 [Source:HGNC Symbol;Acc:6391]                                                    | 2.92 | 2.4E-51 |
| C11orf82 | ENSG00000165490 | chromosome 11 open reading frame 82 [Source:HGNC Symbol;Acc:26351]                                        | 4.79 | 3.2E-51 |
| TYMS     | ENSG00000176890 | thymidylate synthetase [Source:HGNC Symbol;Acc:12441]                                                     | 2.83 | 3.4E-51 |
| PEBP1    | ENSG00000089220 | phosphatidylethanolamine binding protein 1 [Source:HGNC Symbol;Acc:8630]                                  | 2.25 | 3.4E-51 |
| LIG1     | ENSG00000105486 | ligase I, DNA, ATP-dependent [Source:HGNC Symbol;Acc:6598]                                                | 3.05 | 1.7E-50 |
| CENPA    | ENSG00000115163 | centromere protein A [Source:HGNC Symbol;Acc:1851]                                                        | 4.81 | 1.7E-50 |
| SKA3     | ENSG00000165480 | spindle and kinetochore associated complex subunit 3 [Source:HGNC Symbol;Acc:20262]                       | 4.79 | 3.1E-50 |
| PRC1-AS1 | ENSG00000258725 | PRC1 antisense RNA 1 [Source:HGNC Symbol;Acc:48587]                                                       | 3.41 | 3.4E-50 |
| FABP5    | ENSG00000164687 | fatty acid binding protein 5 (psoriasis-associated) [Source:HGNC Symbol;Acc:3560]                         | 3.99 | 4.7E-50 |
| MCM10    | ENSG00000065328 | minichromosome maintenance complex component 10 [Source:HGNC Symbol;Acc:18043]                            | 4.55 | 6.5E-50 |
| DTL      | ENSG00000143476 | denticleless E3 ubiquitin protein ligase homolog (Drosophila) [Source:HGNC Symbol;Acc:30288]              | 5.11 | 6.8E-50 |
| ZNF367   | ENSG00000165244 | zinc finger protein 367 [Source:HGNC Symbol;Acc:18320]                                                    | 4.25 | 1.4E-49 |
| FBL      | ENSG00000105202 | fibrillarin [Source:HGNC Symbol;Acc:3599]                                                                 | 2.77 | 3.3E-49 |
| TCOF1    | ENSG00000070814 | Treacher Collins-Franceschetti syndrome 1 [Source:HGNC Symbol;Acc:11654]                                  | 3.06 | 3.9E-49 |

|          |                 |                                                                                     |      |         |
|----------|-----------------|-------------------------------------------------------------------------------------|------|---------|
| DEPTOR   | ENSG00000155792 | DEP domain containing MTOR-interacting protein [Source:HGNC Symbol;Acc:22953]       | 3.93 | 5.7E-49 |
| MCM8     | ENSG00000125885 | minichromosome maintenance complex component 8 [Source:HGNC Symbol;Acc:16147]       | 2.73 | 8.5E-49 |
| CENPK    | ENSG00000123219 | centromere protein K [Source:HGNC Symbol;Acc:29479]                                 | 3.56 | 1.3E-48 |
| ATM      | ENSG00000149311 | ataxia telangiectasia mutated [Source:HGNC Symbol;Acc:795]                          | 3.07 | 1.8E-48 |
| KIF15    | ENSG00000163808 | kinesin family member 15 [Source:HGNC Symbol;Acc:17273]                             | 4.97 | 1.8E-48 |
| CDC25A   | ENSG00000164045 | cell division cycle 25A [Source:HGNC Symbol;Acc:1725]                               | 2.53 | 2.4E-48 |
| MLEC     | ENSG00000110917 | malectin [Source:HGNC Symbol;Acc:28973]                                             | 1.98 | 2.5E-48 |
| IQGAP3   | ENSG00000183856 | IQ motif containing GTPase activating protein 3 [Source:HGNC Symbol;Acc:20669]      | 3.21 | 4.3E-48 |
| SKA1     | ENSG00000154839 | spindle and kinetochore associated complex subunit 1 [Source:HGNC Symbol;Acc:28109] | 4.72 | 5.3E-48 |
| PCNA     | ENSG00000132646 | proliferating cell nuclear antigen [Source:HGNC Symbol;Acc:8729]                    | 2.69 | 5.4E-48 |
| KLHL13   | ENSG00000003096 | kelch-like family member 13 [Source:HGNC Symbol;Acc:22931]                          | 3.33 | 6.9E-48 |
| PTTG1    | ENSG00000164611 | pituitary tumor-transforming 1 [Source:HGNC Symbol;Acc:9690]                        | 4.10 | 7.7E-48 |
| CKAP2    | ENSG00000136108 | cytoskeleton associated protein 2 [Source:HGNC Symbol;Acc:1990]                     | 3.38 | 1.2E-47 |
| ART3     | ENSG00000156219 | ADP-ribosyltransferase 3 [Source:HGNC Symbol;Acc:725]                               | 6.13 | 1.6E-47 |
| NDC1     | ENSG00000058804 | NDC1 transmembrane nucleoporin [Source:HGNC Symbol;Acc:25525]                       | 2.87 | 1.6E-47 |
| TIMELESS | ENSG00000111602 | timeless circadian clock [Source:HGNC Symbol;Acc:11813]                             | 2.78 | 1.8E-47 |
| CDCA7L   | ENSG00000164649 | cell division cycle associated 7-like [Source:HGNC Symbol;Acc:30777]                | 3.71 | 1.9E-47 |
| NCAPD2   | ENSG00000010292 | non-SMC condensin I complex, subunit D2 [Source:HGNC Symbol;Acc:24305]              | 1.79 | 3.5E-47 |
| PRR11    | ENSG00000068489 | proline rich 11 [Source:HGNC Symbol;Acc:25619]                                      | 3.45 | 6.0E-47 |
| CDT1     | ENSG00000167513 | chromatin licensing and DNA replication factor 1 [Source:HGNC Symbol;Acc:24576]     | 4.84 | 9.8E-47 |
| HPDL     | ENSG00000186603 | 4-hydroxyphenylpyruvate dioxygenase-like [Source:HGNC Symbol;Acc:28242]             | 4.24 | 1.1E-46 |
| CDC7     | ENSG00000097046 | cell division cycle 7 [Source:HGNC Symbol;Acc:1745]                                 | 4.02 | 1.1E-46 |



|          |                 |                                                                                                       |      |         |
|----------|-----------------|-------------------------------------------------------------------------------------------------------|------|---------|
| RMI2     | ENSG00000175643 | RecQ mediated genome instability 2 [Source:HGNC Symbol;Acc:28349]                                     | 3.37 | 2.8E-46 |
| --       | ENSG00000254027 | --                                                                                                    | 3.76 | 8.0E-46 |
| RFC4     | ENSG00000163918 | replication factor C (activator 1) 4, 37kDa [Source:HGNC Symbol;Acc:9972]                             | 2.90 | 1.2E-45 |
| NARS2    | ENSG00000137513 | asparaginyl-tRNA synthetase 2, mitochondrial (putative) [Source:HGNC Symbol;Acc:26274]                | 2.57 | 1.3E-45 |
| BUB1B    | ENSG00000156970 | BUB1 mitotic checkpoint serine/threonine kinase B [Source:HGNC Symbol;Acc:1149]                       | 5.04 | 1.7E-45 |
| MMS22L   | ENSG00000146263 | MMS22-like, DNA repair protein [Source:HGNC Symbol;Acc:21475]                                         | 3.31 | 1.9E-45 |
| KIAA0101 | ENSG00000166803 | KIAA0101 [Source:HGNC Symbol;Acc:28961]                                                               | 4.05 | 2.5E-45 |
| HMGCS2   | ENSG00000134240 | 3-hydroxy-3-methylglutaryl-CoA synthase 2 (mitochondrial) [Source:HGNC Symbol;Acc:5008]               | 3.41 | 3.5E-45 |
| PRPF19   | ENSG00000110107 | pre-mRNA processing factor 19 [Source:HGNC Symbol;Acc:17896]                                          | 2.24 | 7.9E-45 |
| TACC3    | ENSG00000013810 | transforming, acidic coiled-coil containing protein 3 [Source:HGNC Symbol;Acc:11524]                  | 3.28 | 8.7E-45 |
| HSPD1    | ENSG00000144381 | heat shock 60kDa protein 1 (chaperonin) [Source:HGNC Symbol;Acc:5261]                                 | 1.90 | 9.4E-45 |
| EXOSC2   | ENSG00000130713 | exosome component 2 [Source:HGNC Symbol;Acc:17097]                                                    | 2.22 | 1.8E-44 |
| ASRGL1   | ENSG00000162174 | asparaginase like 1 [Source:HGNC Symbol;Acc:16448]                                                    | 2.46 | 2.4E-44 |
| CMSS1    | ENSG00000184220 | cms1 ribosomal small subunit homolog (yeast) [Source:HGNC Symbol;Acc:28666]                           | 3.18 | 2.4E-44 |
| RANBP1   | ENSG00000099901 | RAN binding protein 1 [Source:HGNC Symbol;Acc:9847]                                                   | 2.14 | 3.1E-44 |
| WDHD1    | ENSG00000198554 | WD repeat and HMG-box DNA binding protein 1 [Source:HGNC Symbol;Acc:23170]                            | 3.53 | 5.4E-44 |
| XRCC2    | ENSG00000196584 | X-ray repair complementing defective repair in Chinese hamster cells 2 [Source:HGNC Symbol;Acc:12829] | 4.46 | 8.4E-44 |
| CENPH    | ENSG00000153044 | centromere protein H [Source:HGNC Symbol;Acc:17268]                                                   | 4.47 | 1.3E-43 |

|          |                 |                                                                                                    |      |         |
|----------|-----------------|----------------------------------------------------------------------------------------------------|------|---------|
| DNMT1    | ENSG00000130816 | DNA (cytosine-5-)-methyltransferase 1 [Source:HGNC Symbol;Acc:2976]                                | 2.53 | 2.0E-43 |
| ESCO2    | ENSG00000171320 | establishment of sister chromatid cohesion N-acetyltransferase 2 [Source:HGNC Symbol;Acc:27230]    | 5.71 | 2.0E-43 |
| NUP210   | ENSG00000132182 | nucleoporin 210kDa [Source:HGNC Symbol;Acc:30052]                                                  | 2.37 | 2.2E-43 |
| GGCT     | ENSG00000006625 | gamma-glutamylcyclotransferase [Source:HGNC Symbol;Acc:21705]                                      | 1.97 | 2.2E-43 |
| GTSE1    | ENSG00000075218 | G-2 and S-phase expressed 1 [Source:HGNC Symbol;Acc:13698]                                         | 3.50 | 2.3E-43 |
| MIS18A   | ENSG00000159055 | MIS18 kinetochore protein A [Source:HGNC Symbol;Acc:1286]                                          | 3.04 | 2.3E-43 |
| IL33     | ENSG00000137033 | interleukin 33 [Source:HGNC Symbol;Acc:16028]                                                      | 3.88 | 3.1E-43 |
| CDC45    | ENSG00000093009 | cell division cycle 45 [Source:HGNC Symbol;Acc:1739]                                               | 5.21 | 3.5E-43 |
| NCAPG2   | ENSG00000146918 | non-SMC condensin II complex, subunit G2 [Source:HGNC Symbol;Acc:21904]                            | 2.99 | 3.6E-43 |
| DSCC1    | ENSG00000136982 | DNA replication and sister chromatid cohesion 1 [Source:HGNC Symbol;Acc:24453]                     | 5.47 | 4.9E-43 |
| E2F8     | ENSG00000129173 | E2F transcription factor 8 [Source:HGNC Symbol;Acc:24727]                                          | 3.53 | 5.5E-43 |
| RNASEH2A | ENSG00000104889 | ribonuclease H2, subunit A [Source:HGNC Symbol;Acc:18518]                                          | 3.13 | 1.0E-42 |
| RRS1     | ENSG00000179041 | RRS1 ribosome biogenesis regulator homolog ( <i>S. cerevisiae</i> ) [Source:HGNC Symbol;Acc:17083] | 2.43 | 1.3E-42 |
| TRIP13   | ENSG00000071539 | thyroid hormone receptor interactor 13 [Source:HGNC Symbol;Acc:12307]                              | 2.70 | 1.3E-42 |
| VRK1     | ENSG00000100749 | vaccinia related kinase 1 [Source:HGNC Symbol;Acc:12718]                                           | 3.22 | 1.6E-42 |
| TMEM194A | ENSG00000166881 | transmembrane protein 194A [Source:HGNC Symbol;Acc:29001]                                          | 2.43 | 2.5E-42 |
| GMNN     | ENSG00000112312 | geminin, DNA replication inhibitor [Source:HGNC Symbol;Acc:17493]                                  | 3.06 | 2.8E-42 |
| SSRP1    | ENSG00000149136 | structure specific recognition protein 1 [Source:HGNC Symbol;Acc:11327]                            | 1.90 | 3.9E-42 |
| LYAR     | ENSG00000145220 | Ly1 antibody reactive [Source:HGNC Symbol;Acc:26021]                                               | 2.51 | 4.3E-42 |
| ADCK3    | ENSG00000163050 | aarF domain containing kinase 3 [Source:HGNC Symbol;Acc:16812]                                     | 2.44 | 4.6E-42 |
| MELK     | ENSG00000165304 | maternal embryonic leucine zipper kinase [Source:HGNC Symbol;Acc:16870]                            | 2.10 | 8.7E-41 |

|           |                 |                                                                                         |      |         |
|-----------|-----------------|-----------------------------------------------------------------------------------------|------|---------|
| CASC5     | ENSG00000137812 | cancer susceptibility candidate 5 [Source:HGNC Symbol;Acc:24054]                        | 3.33 | 8.8E-41 |
| EARS2     | ENSG00000103356 | glutamyl-tRNA synthetase 2, mitochondrial [Source:HGNC Symbol;Acc:29419]                | 2.14 | 8.8E-41 |
| CHEK2     | ENSG00000183765 | checkpoint kinase 2 [Source:HGNC Symbol;Acc:16627]                                      | 2.84 | 9.2E-41 |
| SHCBP1    | ENSG00000171241 | SHC SH2-domain binding protein 1 [Source:HGNC Symbol;Acc:29547]                         | 3.83 | 1.0E-40 |
| PIF1      | ENSG00000140451 | PIF1 5'-to-3' DNA helicase [Source:HGNC Symbol;Acc:26220]                               | 3.79 | 1.1E-40 |
| ITFG2     | ENSG00000111203 | integrin alpha FG-GAP repeat containing 2 [Source:HGNC Symbol;Acc:30879]                | 2.44 | 1.5E-40 |
| PASK      | ENSG00000115687 | PAS domain containing serine/threonine kinase [Source:HGNC Symbol;Acc:17270]            | 2.83 | 1.9E-40 |
| PSMG1     | ENSG00000183527 | proteasome (prosome, macropain) assembly chaperone 1 [Source:HGNC Symbol;Acc:3043]      | 2.30 | 3.6E-40 |
| CCND2     | ENSG00000118971 | cyclin D2 [Source:HGNC Symbol;Acc:1583]                                                 | 3.11 | 3.6E-40 |
| --        | ENSG00000245937 | --                                                                                      | 2.10 | 7.2E-40 |
| NT5DC3    | ENSG00000111696 | 5'-nucleotidase domain containing 3 [Source:HGNC Symbol;Acc:30826]                      | 2.24 | 1.1E-39 |
| ETS2      | ENSG00000157557 | v-ets avian erythroblastosis virus E26 oncogene homolog 2 [Source:HGNC Symbol;Acc:3489] | 1.77 | 3.2E-39 |
| TMEM261   | ENSG00000137038 | transmembrane protein 261 [Source:HGNC Symbol;Acc:30536]                                | 2.14 | 3.4E-39 |
| PALD1     | ENSG00000107719 | phosphatase domain containing, paladin 1 [Source:HGNC Symbol;Acc:23530]                 | 4.94 | 4.5E-39 |
| MRPL16    | ENSG00000166902 | mitochondrial ribosomal protein L16 [Source:HGNC Symbol;Acc:14476]                      | 1.96 | 8.2E-39 |
| MARS2     | ENSG00000247626 | methionyl-tRNA synthetase 2, mitochondrial [Source:HGNC Symbol;Acc:25133]               | 3.03 | 9.9E-39 |
| TICRR     | ENSG00000140534 | TOPBP1-interacting checkpoint and replication regulator [Source:HGNC Symbol;Acc:28704]  | 3.57 | 1.1E-38 |
| CCDC34    | ENSG00000109881 | coiled-coil domain containing 34 [Source:HGNC Symbol;Acc:25079]                         | 3.25 | 1.2E-38 |
| DHRS4-AS1 | ENSG00000215256 | DHRS4 antisense RNA 1 [Source:HGNC Symbol;Acc:23175]                                    | 2.09 | 1.2E-38 |

|        |                 |                                                                                                                 |      |         |
|--------|-----------------|-----------------------------------------------------------------------------------------------------------------|------|---------|
| NOC3L  | ENSG00000173145 | nucleolar complex associated 3 homolog ( <i>S. cerevisiae</i> ) [Source:HGNC Symbol;Acc:24034]                  | 2.26 | 1.3E-38 |
| MTFR2  | ENSG00000146410 | mitochondrial fission regulator 2 [Source:HGNC Symbol;Acc:21115]                                                | 3.00 | 1.4E-38 |
| EXO1   | ENSG00000174371 | exonuclease 1 [Source:HGNC Symbol;Acc:3511]                                                                     | 5.62 | 2.3E-38 |
| --     | ENSG00000254290 | --                                                                                                              | 3.01 | 2.8E-38 |
| ZWILCH | ENSG00000174442 | zwilch kinetochore protein [Source:HGNC Symbol;Acc:25468]                                                       | 2.67 | 3.0E-38 |
| OIP5   | ENSG00000104147 | Opa interacting protein 5 [Source:HGNC Symbol;Acc:20300]                                                        | 3.98 | 4.2E-38 |
| DNAH11 | ENSG00000105877 | dynein, axonemal, heavy chain 11 [Source:HGNC Symbol;Acc:2942]                                                  | 3.87 | 4.3E-38 |
| PRPS2  | ENSG00000101911 | phosphoribosyl pyrophosphate synthetase 2 [Source:HGNC Symbol;Acc:9465]                                         | 2.41 | 6.7E-38 |
| NUP35  | ENSG00000163002 | nucleoporin 35kDa [Source:HGNC Symbol;Acc:29797]                                                                | 2.43 | 9.1E-38 |
| ANAPC1 | ENSG00000153107 | anaphase promoting complex subunit 1 [Source:HGNC Symbol;Acc:19988]                                             | 2.02 | 1.7E-37 |
| DDX12P | ENSG00000214826 | DEAD/H (Asp-Glu-Ala-Asp/His) box polypeptide 12, pseudogene [Source:HGNC Symbol;Acc:2737]                       | 3.76 | 1.8E-37 |
| DANCR  | ENSG00000226950 | differentiation antagonizing non-protein coding RNA [Source:HGNC Symbol;Acc:28964]                              | 2.52 | 2.2E-37 |
| SAMD5  | ENSG00000203727 | sterile alpha motif domain containing 5 [Source:HGNC Symbol;Acc:21180]                                          | 2.60 | 4.5E-37 |
| MCM7   | ENSG00000166508 | minichromosome maintenance complex component 7 [Source:HGNC Symbol;Acc:6950]                                    | 2.50 | 5.4E-37 |
| FANCD2 | ENSG00000144554 | Fanconi anemia, complementation group D2 [Source:HGNC Symbol;Acc:3585]                                          | 2.02 | 6.0E-37 |
| ATIC   | ENSG00000138363 | 5-aminoimidazole-4-carboxamide ribonucleotide formyltransferase/IMP cyclohydrolase [Source:HGNC Symbol;Acc:794] | 1.73 | 6.9E-37 |
| NOP56  | ENSG00000101361 | NOP56 ribonucleoprotein [Source:HGNC Symbol;Acc:15911]                                                          | 1.84 | 8.7E-37 |
| TFAP4  | ENSG00000090447 | transcription factor AP-4 (activating enhancer binding protein 4) [Source:HGNC Symbol;Acc:11745]                | 3.63 | 1.0E-36 |

|          |                 |                                                                                                   |      |         |
|----------|-----------------|---------------------------------------------------------------------------------------------------|------|---------|
| CRTAP    | ENSG00000170275 | cartilage associated protein [Source:HGNC Symbol;Acc:2379]                                        | 1.67 | 1.2E-36 |
| EBPL     | ENSG00000123179 | emopamil binding protein-like [Source:HGNC Symbol;Acc:18061]                                      | 2.56 | 1.2E-36 |
| NOLC1    | ENSG00000166197 | nucleolar and coiled-body phosphoprotein 1 [Source:HGNC Symbol;Acc:15608]                         | 1.94 | 2.5E-36 |
| CDC25C   | ENSG00000158402 | cell division cycle 25C [Source:HGNC Symbol;Acc:1727]                                             | 4.06 | 2.9E-36 |
| LRRCC1   | ENSG00000133739 | leucine rich repeat and coiled-coil centrosomal protein 1 [Source:HGNC Symbol;Acc:29373]          | 3.05 | 2.9E-36 |
| GPRIN3   | ENSG00000185477 | GPRIN family member 3 [Source:HGNC Symbol;Acc:27733]                                              | 4.68 | 3.1E-36 |
| SCML1    | ENSG00000047634 | sex comb on midleg-like 1 (Drosophila) [Source:HGNC Symbol;Acc:10580]                             | 2.45 | 6.0E-36 |
| KIF18A   | ENSG00000121621 | kinesin family member 18A [Source:HGNC Symbol;Acc:29441]                                          | 3.29 | 1.6E-35 |
| CDCA2    | ENSG00000184661 | cell division cycle associated 2 [Source:HGNC Symbol;Acc:14623]                                   | 3.33 | 1.8E-35 |
| QTRT1    | ENSG00000213339 | queuine tRNA-ribosyltransferase 1 [Source:HGNC Symbol;Acc:23797]                                  | 2.81 | 1.8E-35 |
| DPH5     | ENSG00000117543 | diphthamide biosynthesis 5 [Source:HGNC Symbol;Acc:24270]                                         | 2.51 | 2.2E-35 |
| MAGEF1   | ENSG00000177383 | melanoma antigen family F, 1 [Source:HGNC Symbol;Acc:29639]                                       | 1.99 | 2.8E-35 |
| GIN5     | ENSG00000147536 | GIN5 complex subunit 4 (Sld5 homolog) [Source:HGNC Symbol;Acc:28226]                              | 3.50 | 2.8E-35 |
| TBXAS1   | ENSG00000059377 | thromboxane A synthase 1 (platelet) [Source:HGNC Symbol;Acc:11609]                                | 1.97 | 3.0E-35 |
| SLC25A26 | ENSG00000144741 | solute carrier family 25 (S-adenosylmethionine carrier), member 26 [Source:HGNC Symbol;Acc:20661] | 2.15 | 3.2E-35 |
| MCM5     | ENSG00000100297 | minichromosome maintenance complex component 5 [Source:HGNC Symbol;Acc:6948]                      | 2.49 | 4.2E-35 |
| PFAS     | ENSG00000178921 | phosphoribosylformylglycinamide synthase [Source:HGNC Symbol;Acc:8863]                            | 2.98 | 4.8E-35 |
| HOXB8    | ENSG00000120068 | homeobox B8 [Source:HGNC Symbol;Acc:5119]                                                         | 2.57 | 5.5E-35 |
| ORC6     | ENSG00000091651 | origin recognition complex, subunit 6 [Source:HGNC Symbol;Acc:17151]                              | 2.68 | 7.5E-35 |

|          |                 |                                                                                                                   |      |         |
|----------|-----------------|-------------------------------------------------------------------------------------------------------------------|------|---------|
| SPC25    | ENSG00000152253 | SPC25, NDC80 kinetochore complex component [Source:HGNC Symbol;Acc:24031]                                         | 3.76 | 1.3E-34 |
| HMBS     | ENSG00000256269 | hydroxymethylbilane synthase [Source:HGNC Symbol;Acc:4982]                                                        | 2.41 | 1.4E-34 |
| SUPT16H  | ENSG00000092201 | suppressor of Ty 16 homolog ( <i>S. cerevisiae</i> ) [Source:HGNC Symbol;Acc:11465]                               | 1.55 | 1.8E-34 |
| CBX5     | ENSG00000094916 | chromobox homolog 5 [Source:HGNC Symbol;Acc:1555]                                                                 | 2.16 | 2.1E-34 |
| ORC1     | ENSG00000085840 | origin recognition complex, subunit 1 [Source:HGNC Symbol;Acc:8487]                                               | 4.44 | 2.2E-34 |
| ASB9     | ENSG00000102048 | ankyrin repeat and SOCS box containing 9 [Source:HGNC Symbol;Acc:17184]                                           | 4.14 | 4.3E-34 |
| CD200    | ENSG00000091972 | CD200 molecule [Source:HGNC Symbol;Acc:7203]                                                                      | 2.37 | 6.5E-34 |
| PTPRO    | ENSG00000151490 | protein tyrosine phosphatase, receptor type, O [Source:HGNC Symbol;Acc:9678]                                      | 6.39 | 8.5E-34 |
| HADH     | ENSG00000138796 | hydroxyacyl-CoA dehydrogenase [Source:HGNC Symbol;Acc:4799]                                                       | 1.72 | 9.8E-34 |
| KAT2A    | ENSG00000108773 | K(lysine) acetyltransferase 2A [Source:HGNC Symbol;Acc:4201]                                                      | 2.35 | 1.1E-33 |
| AP3M2    | ENSG00000070718 | adaptor-related protein complex 3, mu 2 subunit [Source:HGNC Symbol;Acc:570]                                      | 2.02 | 2.0E-33 |
| PRIM1    | ENSG00000198056 | primase, DNA, polypeptide 1 (49kDa) [Source:HGNC Symbol;Acc:9369]                                                 | 4.58 | 2.2E-33 |
| CENPJ    | ENSG00000151849 | centromere protein J [Source:HGNC Symbol;Acc:17272]                                                               | 3.01 | 2.2E-33 |
| KIAA1524 | ENSG00000163507 | KIAA1524 [Source:HGNC Symbol;Acc:29302]                                                                           | 3.44 | 2.2E-33 |
| DBF4     | ENSG00000006634 | DBF4 homolog ( <i>S. cerevisiae</i> ) [Source:HGNC Symbol;Acc:17364]                                              | 2.51 | 2.8E-33 |
| CTF18    | ENSG00000127586 | CTF18, chromosome transmission fidelity factor 18 homolog ( <i>S. cerevisiae</i> ) [Source:HGNC Symbol;Acc:18435] | 3.29 | 5.5E-33 |
| DACH1    | ENSG00000165659 | dachshund homolog 1 ( <i>Drosophila</i> ) [Source:HGNC Symbol;Acc:2663]                                           | 4.01 | 6.6E-33 |
| ZNRF3    | ENSG00000183579 | zinc and ring finger 3 [Source:HGNC Symbol;Acc:18126]                                                             | 2.66 | 9.1E-33 |
| FARSB    | ENSG00000116120 | phenylalanyl-tRNA synthetase, beta subunit [Source:HGNC Symbol;Acc:17800]                                         | 1.94 | 9.8E-33 |
| METTL1   | ENSG00000037897 | methyltransferase like 1 [Source:HGNC Symbol;Acc:7030]                                                            | 2.53 | 9.9E-33 |

|          |                 |                                                                                             |      |         |
|----------|-----------------|---------------------------------------------------------------------------------------------|------|---------|
| ODF2     | ENSG00000136811 | outer dense fiber of sperm tails 2 [Source:HGNC Symbol;Acc:8114]                            | 1.49 | 1.1E-32 |
| PLK4     | ENSG00000142731 | polo-like kinase 4 [Source:HGNC Symbol;Acc:11397]                                           | 3.14 | 1.4E-32 |
| MDN1     | ENSG00000112159 | MDN1, midasin homolog (yeast) [Source:HGNC Symbol;Acc:18302]                                | 1.90 | 1.4E-32 |
| POLR1B   | ENSG00000125630 | polymerase (RNA) I polypeptide B, 128kDa [Source:HGNC Symbol;Acc:20454]                     | 2.09 | 1.8E-32 |
| FBXO5    | ENSG00000112029 | F-box protein 5 [Source:HGNC Symbol;Acc:13584]                                              | 4.08 | 2.5E-32 |
| LYRM4    | ENSG00000214113 | LYR motif containing 4 [Source:HGNC Symbol;Acc:21365]                                       | 2.45 | 2.6E-32 |
| NRARP    | ENSG00000198435 | NOTCH-regulated ankyrin repeat protein [Source:HGNC Symbol;Acc:33843]                       | 2.01 | 3.6E-32 |
| USP13    | ENSG00000058056 | ubiquitin specific peptidase 13 (isopeptidase T-3) [Source:HGNC Symbol;Acc:12611]           | 4.33 | 3.8E-32 |
| POLA1    | ENSG00000101868 | polymerase (DNA directed), alpha 1, catalytic subunit [Source:HGNC Symbol;Acc:9173]         | 2.53 | 5.0E-32 |
| FXN      | ENSG00000165060 | frataxin [Source:HGNC Symbol;Acc:3951]                                                      | 2.69 | 5.4E-32 |
| RCCD1    | ENSG00000166965 | RCC1 domain containing 1 [Source:HGNC Symbol;Acc:30457]                                     | 2.29 | 6.2E-32 |
| CCNB1IP1 | ENSG00000100814 | cyclin B1 interacting protein 1, E3 ubiquitin protein ligase [Source:HGNC Symbol;Acc:19437] | 2.00 | 6.4E-32 |
| FAM81A   | ENSG00000157470 | family with sequence similarity 81, member A [Source:HGNC Symbol;Acc:28379]                 | 2.25 | 6.4E-32 |
| ANGEL1   | ENSG00000013523 | angel homolog 1 (Drosophila) [Source:HGNC Symbol;Acc:19961]                                 | 2.06 | 6.6E-32 |
| SAP30    | ENSG00000164105 | Sin3A-associated protein, 30kDa [Source:HGNC Symbol;Acc:10532]                              | 2.64 | 6.8E-32 |
| ECE2     | ENSG00000145194 | endothelin converting enzyme 2 [Source:HGNC Symbol;Acc:13275]                               | 2.79 | 6.9E-32 |
| CCNF     | ENSG00000162063 | cyclin F [Source:HGNC Symbol;Acc:1591]                                                      | 2.02 | 1.1E-31 |
| CHAF1B   | ENSG00000159259 | chromatin assembly factor 1, subunit B (p60) [Source:HGNC Symbol;Acc:1911]                  | 3.00 | 1.1E-31 |
| --       | ENSG00000269175 | Uncharacterized protein [Source:UniProtKB/TrEMBL;Acc:M0QYT2]                                | 2.38 | 1.5E-31 |
| DTYMK    | ENSG00000168393 | deoxythymidylate kinase (thymidylate kinase) [Source:HGNC Symbol;Acc:3061]                  | 2.52 | 1.7E-31 |
| NUP43    | ENSG00000120253 | nucleoporin 43kDa [Source:HGNC Symbol;Acc:21182]                                            | 2.00 | 1.9E-31 |

|          |                 |                                                                                                                                        |      |         |
|----------|-----------------|----------------------------------------------------------------------------------------------------------------------------------------|------|---------|
| BLM      | ENSG00000197299 | Bloom syndrome, RecQ helicase-like [Source:HGNC Symbol;Acc:1058]<br>Fanconi anemia, complementation group G [Source:HGNC               | 4.46 | 2.5E-31 |
| FANCG    | ENSG00000221829 | Symbol;Acc:3588]                                                                                                                       | 2.44 | 2.6E-31 |
| AXIN2    | ENSG00000168646 | axin 2 [Source:HGNC Symbol;Acc:904]                                                                                                    | 2.91 | 3.0E-31 |
| HMGB3    | ENSG00000029993 | high mobility group box 3 [Source:HGNC Symbol;Acc:5004]                                                                                | 1.89 | 3.2E-31 |
| RNASEH2B | ENSG00000136104 | ribonuclease H2, subunit B [Source:HGNC Symbol;Acc:25671]                                                                              | 2.69 | 3.3E-31 |
| PLK1     | ENSG00000166851 | polo-like kinase 1 [Source:HGNC Symbol;Acc:9077]<br>protein phosphatase, Mg <sup>2+</sup> /Mn <sup>2+</sup> dependent, 1H [Source:HGNC | 2.23 | 3.7E-31 |
| PPM1H    | ENSG00000111110 | Symbol;Acc:18583]                                                                                                                      | 2.56 | 4.4E-31 |
| NHP2     | ENSG00000145912 | NHP2 ribonucleoprotein [Source:HGNC Symbol;Acc:14377]<br>serine hydroxymethyltransferase 1 (soluble) [Source:HGNC                      | 2.18 | 4.4E-31 |
| SHMT1    | ENSG00000176974 | Symbol;Acc:10850]                                                                                                                      | 1.74 | 5.3E-31 |
| POLR3K   | ENSG00000161980 | polymerase (RNA) III (DNA directed) polypeptide K, 12.3 kDa<br>[Source:HGNC Symbol;Acc:14121]                                          | 2.42 | 1.0E-30 |
| NPM1     | ENSG00000181163 | nucleophosmin (nucleolar phosphoprotein B23, numatrin)<br>[Source:HGNC Symbol;Acc:7910]                                                | 1.76 | 1.0E-30 |
| SMC2     | ENSG00000136824 | structural maintenance of chromosomes 2 [Source:HGNC<br>Symbol;Acc:14011]                                                              | 2.84 | 1.1E-30 |
| CEP78    | ENSG00000148019 | centrosomal protein 78kDa [Source:HGNC Symbol;Acc:25740]                                                                               | 2.83 | 1.4E-30 |
| ITGA9    | ENSG00000144668 | integrin, alpha 9 [Source:HGNC Symbol;Acc:6145]<br>small nuclear ribonucleoprotein polypeptide F [Source:HGNC                          | 2.89 | 1.6E-30 |
| SNRPF    | ENSG00000139343 | Symbol;Acc:11162]                                                                                                                      | 1.80 | 1.7E-30 |
| KHK      | ENSG00000138030 | ketoheokinase (fructokinase) [Source:HGNC Symbol;Acc:6315]<br>mitochondrial ribosomal protein S26 [Source:HGNC                         | 2.67 | 1.7E-30 |
| MRPS26   | ENSG00000125901 | Symbol;Acc:14045]                                                                                                                      | 1.95 | 1.9E-30 |
| GEMIN6   | ENSG00000152147 | gem (nuclear organelle) associated protein 6 [Source:HGNC<br>Symbol;Acc:20044]                                                         | 2.17 | 2.6E-30 |
| SF3A3    | ENSG00000183431 | splicing factor 3a, subunit 3, 60kDa [Source:HGNC Symbol;Acc:10767]                                                                    | 1.69 | 3.1E-30 |



|           |                 |                                                                                      |      |         |
|-----------|-----------------|--------------------------------------------------------------------------------------|------|---------|
| CENPE     | ENSG00000138778 | centromere protein E, 312kDa [Source:HGNC Symbol;Acc:1856]                           | 3.45 | 3.4E-30 |
| WDR62     | ENSG00000075702 | WD repeat domain 62 [Source:HGNC Symbol;Acc:24502]                                   | 3.92 | 3.7E-30 |
| TNFAIP8L1 | ENSG00000185361 | tumor necrosis factor, alpha-induced protein 8-like 1 [Source:HGNC Symbol;Acc:28279] | 2.32 | 4.1E-30 |
| RRM1      | ENSG00000167325 | ribonucleotide reductase M1 [Source:HGNC Symbol;Acc:10451]                           | 2.19 | 5.9E-30 |
| ALG8      | ENSG00000159063 | ALG8, alpha-1,3-glucosyltransferase [Source:HGNC Symbol;Acc:23161]                   | 1.52 | 6.1E-30 |
| MYB       | ENSG00000118513 | v-myb avian myeloblastosis viral oncogene homolog [Source:HGNC Symbol;Acc:7545]      | 3.10 | 6.4E-30 |
| HAUS1     | ENSG00000152240 | HAUS augmin-like complex, subunit 1 [Source:HGNC Symbol;Acc:25174]                   | 2.92 | 8.9E-30 |
| --        | ENSG00000272909 | --                                                                                   | 2.90 | 1.1E-29 |
| NCL       | ENSG00000115053 | nucleolin [Source:HGNC Symbol;Acc:7667]                                              | 1.78 | 1.4E-29 |
| BRIP1     | ENSG00000136492 | BRCA1 interacting protein C-terminal helicase 1 [Source:HGNC Symbol;Acc:20473]       | 3.81 | 1.6E-29 |
| ADAT2     | ENSG00000189007 | adenosine deaminase, tRNA-specific 2 [Source:HGNC Symbol;Acc:21172]                  | 2.42 | 1.7E-29 |
| TSEN15    | ENSG00000198860 | TSEN15 tRNA splicing endonuclease subunit [Source:HGNC Symbol;Acc:16791]             | 2.00 | 2.3E-29 |
| TRIM59    | ENSG00000213186 | tripartite motif containing 59 [Source:HGNC Symbol;Acc:30834]                        | 2.23 | 2.5E-29 |
| --        | ENSG00000270172 | --                                                                                   | 2.77 | 2.7E-29 |
| DEPDC1B   | ENSG00000035499 | DEP domain containing 1B [Source:HGNC Symbol;Acc:24902]                              | 2.87 | 2.7E-29 |
| MEST      | ENSG00000106484 | mesoderm specific transcript [Source:HGNC Symbol;Acc:7028]                           | 2.14 | 3.0E-29 |
| PMCH      | ENSG00000183395 | pro-melanin-concentrating hormone [Source:HGNC Symbol;Acc:9109]                      | 3.67 | 3.2E-29 |
| IVD       | ENSG00000128928 | isovaleryl-CoA dehydrogenase [Source:HGNC Symbol;Acc:6186]                           | 1.58 | 3.5E-29 |
| MRPL3     | ENSG00000114686 | mitochondrial ribosomal protein L3 [Source:HGNC Symbol;Acc:10379]                    | 1.68 | 3.9E-29 |
| TMEM97    | ENSG00000109084 | transmembrane protein 97 [Source:HGNC Symbol;Acc:28106]                              | 1.51 | 6.2E-29 |

|         |                 |                                                                                                               |      |         |
|---------|-----------------|---------------------------------------------------------------------------------------------------------------|------|---------|
| SLC39A8 | ENSG00000138821 | solute carrier family 39 (zinc transporter), member 8 [Source:HGNC Symbol;Acc:20862]                          | 3.00 | 6.2E-29 |
| UCK2    | ENSG00000143179 | uridine-cytidine kinase 2 [Source:HGNC Symbol;Acc:12562]                                                      | 1.49 | 6.6E-29 |
| WDR12   | ENSG00000138442 | WD repeat domain 12 [Source:HGNC Symbol;Acc:14098]                                                            | 2.18 | 6.8E-29 |
| THOC3   | ENSG00000051596 | THO complex 3 [Source:HGNC Symbol;Acc:19072]                                                                  | 2.09 | 7.1E-29 |
| MTL5    | ENSG00000132749 | metallothionein-like 5, testis-specific (tesmin) [Source:HGNC Symbol;Acc:7446]                                | 2.47 | 8.6E-29 |
| POP5    | ENSG00000167272 | processing of precursor 5, ribonuclease P/MRP subunit ( <i>S. cerevisiae</i> ) [Source:HGNC Symbol;Acc:17689] | 1.87 | 1.1E-28 |
| KANK1   | ENSG00000107104 | KN motif and ankyrin repeat domains 1 [Source:HGNC Symbol;Acc:19309]                                          | 1.54 | 1.6E-28 |
| PFKM    | ENSG00000152556 | phosphofructokinase, muscle [Source:HGNC Symbol;Acc:8877]                                                     | 1.99 | 1.6E-28 |
| THYN1   | ENSG00000151500 | thymocyte nuclear protein 1 [Source:HGNC Symbol;Acc:29560]                                                    | 1.99 | 1.9E-28 |
| PUS7    | ENSG00000091127 | pseudouridylate synthase 7 homolog ( <i>S. cerevisiae</i> ) [Source:HGNC Symbol;Acc:26033]                    | 2.40 | 2.0E-28 |
| PPAT    | ENSG00000128059 | phosphoribosyl pyrophosphate amidotransferase [Source:HGNC Symbol;Acc:9238]                                   | 2.78 | 2.8E-28 |
| --      | ENSG00000111788 | --                                                                                                            | 3.19 | 2.9E-28 |
| MND1    | ENSG00000121211 | meiotic nuclear divisions 1 homolog ( <i>S. cerevisiae</i> ) [Source:HGNC Symbol;Acc:24839]                   | 3.95 | 2.9E-28 |
| DHFR    | ENSG00000228716 | dihydrofolate reductase [Source:HGNC Symbol;Acc:2861]                                                         | 2.19 | 3.1E-28 |
| NPY6R   | ENSG00000226306 | neuropeptide Y receptor Y6 (pseudogene) [Source:HGNC Symbol;Acc:7959]                                         | 5.59 | 3.2E-28 |
| --      | ENSG00000229257 | --                                                                                                            | 3.14 | 3.3E-28 |
| CDC6    | ENSG00000094804 | cell division cycle 6 [Source:HGNC Symbol;Acc:1744]                                                           | 2.02 | 3.7E-28 |
| TCF7    | ENSG00000081059 | transcription factor 7 (T-cell specific, HMG-box) [Source:HGNC Symbol;Acc:11639]                              | 1.67 | 5.0E-28 |
| ACSS1   | ENSG00000154930 | acyl-CoA synthetase short-chain family member 1 [Source:HGNC Symbol;Acc:16091]                                | 2.29 | 5.3E-28 |

|        |                 |                                                                                                                |      |         |
|--------|-----------------|----------------------------------------------------------------------------------------------------------------|------|---------|
| SNRPD1 | ENSG00000167088 | small nuclear ribonucleoprotein D1 polypeptide 16kDa [Source:HGNC Symbol;Acc:11158]                            | 1.65 | 5.8E-28 |
| SNHG16 | ENSG00000163597 | small nucleolar RNA host gene 16 (non-protein coding) [Source:HGNC Symbol;Acc:44352]                           | 1.54 | 6.1E-28 |
| DHX33  | ENSG00000005100 | DEAH (Asp-Glu-Ala-His) box polypeptide 33 [Source:HGNC Symbol;Acc:16718]                                       | 1.84 | 6.9E-28 |
| CAD    | ENSG00000084774 | carbamoyl-phosphate synthetase 2, aspartate transcarbamylase, and dihydroorotase [Source:HGNC Symbol;Acc:1424] | 1.99 | 7.4E-28 |
| AADAT  | ENSG00000109576 | aminoadipate aminotransferase [Source:HGNC Symbol;Acc:17929]                                                   | 3.02 | 8.3E-28 |
| --     | ENSG00000255126 | --                                                                                                             | 2.52 | 9.5E-28 |
| LSM2   | ENSG00000204392 | LSM2 homolog, U6 small nuclear RNA associated ( <i>S. cerevisiae</i> ) [Source:HGNC Symbol;Acc:13940]          | 1.62 | 9.6E-28 |
| RAD18  | ENSG00000070950 | RAD18 homolog ( <i>S. cerevisiae</i> ) [Source:HGNC Symbol;Acc:18278]                                          | 1.87 | 1.0E-27 |
| MRPS9  | ENSG00000135972 | mitochondrial ribosomal protein S9 [Source:HGNC Symbol;Acc:14501]                                              | 1.54 | 1.1E-27 |
| VASH1  | ENSG00000071246 | vasohibin 1 [Source:HGNC Symbol;Acc:19964]                                                                     | 3.00 | 1.2E-27 |
| COA1   | ENSG00000106603 | cytochrome c oxidase assembly factor 1 homolog ( <i>S. cerevisiae</i> ) [Source:HGNC Symbol;Acc:21868]         | 1.72 | 1.3E-27 |
| SGOL1  | ENSG00000129810 | shugoshin-like 1 ( <i>S. pombe</i> ) [Source:HGNC Symbol;Acc:25088]                                            | 3.28 | 1.3E-27 |
| MRPS27 | ENSG00000113048 | mitochondrial ribosomal protein S27 [Source:HGNC Symbol;Acc:14512]                                             | 1.94 | 1.5E-27 |
| TRAP1  | ENSG00000126602 | TNF receptor-associated protein 1 [Source:HGNC Symbol;Acc:16264]                                               | 1.95 | 1.8E-27 |
| BRIX1  | ENSG00000113460 | BRX1, biogenesis of ribosomes, homolog ( <i>S. cerevisiae</i> ) [Source:HGNC Symbol;Acc:24170]                 | 1.95 | 2.0E-27 |
| KIF20B | ENSG00000138182 | kinesin family member 20B [Source:HGNC Symbol;Acc:7212]                                                        | 2.84 | 2.2E-27 |
| DCAF13 | ENSG00000164934 | DDB1 and CUL4 associated factor 13 [Source:HGNC Symbol;Acc:24535]                                              | 1.76 | 2.5E-27 |
| IPO5   | ENSG00000065150 | importin 5 [Source:HGNC Symbol;Acc:6402]                                                                       | 1.72 | 2.6E-27 |
| BUB3   | ENSG00000154473 | BUB3 mitotic checkpoint protein [Source:HGNC Symbol;Acc:1151]                                                  | 1.38 | 3.7E-27 |

|          |                 |                                                                                     |      |         |
|----------|-----------------|-------------------------------------------------------------------------------------|------|---------|
| IMPDH2   | ENSG00000178035 | IMP (inosine 5'-monophosphate) dehydrogenase 2 [Source:HGNC Symbol;Acc:6053]        | 1.66 | 3.7E-27 |
| CBX2     | ENSG00000173894 | chromobox homolog 2 [Source:HGNC Symbol;Acc:1552]                                   | 3.93 | 3.8E-27 |
| SMC4     | ENSG00000113810 | structural maintenance of chromosomes 4 [Source:HGNC Symbol;Acc:14013]              | 2.12 | 3.8E-27 |
| TTC27    | ENSG00000018699 | tetratricopeptide repeat domain 27 [Source:HGNC Symbol;Acc:25986]                   | 2.33 | 4.4E-27 |
| PLCB4    | ENSG00000101333 | phospholipase C, beta 4 [Source:HGNC Symbol;Acc:9059]                               | 2.09 | 4.8E-27 |
| CGREF1   | ENSG00000138028 | cell growth regulator with EF-hand domain 1 [Source:HGNC Symbol;Acc:16962]          | 2.23 | 5.0E-27 |
| SNRPE    | ENSG00000182004 | small nuclear ribonucleoprotein polypeptide E [Source:HGNC Symbol;Acc:11161]        | 1.74 | 5.3E-27 |
| SNHG6    | ENSG00000245910 | small nucleolar RNA host gene 6 (non-protein coding) [Source:HGNC Symbol;Acc:32965] | 1.59 | 5.5E-27 |
| RAD51    | ENSG00000051180 | RAD51 recombinase [Source:HGNC Symbol;Acc:9817]                                     | 2.27 | 5.8E-27 |
| CDCA8    | ENSG00000134690 | cell division cycle associated 8 [Source:HGNC Symbol;Acc:14629]                     | 1.61 | 6.1E-27 |
| SFXN2    | ENSG00000156398 | sideroflexin 2 [Source:HGNC Symbol;Acc:16086]                                       | 3.03 | 6.2E-27 |
| BEND3    | ENSG00000178409 | BEN domain containing 3 [Source:HGNC Symbol;Acc:23040]                              | 2.27 | 6.3E-27 |
| DCTPP1   | ENSG00000179958 | dCTP pyrophosphatase 1 [Source:HGNC Symbol;Acc:28777]                               | 1.73 | 8.7E-27 |
| SNHG5    | ENSG00000203875 | small nucleolar RNA host gene 5 (non-protein coding) [Source:HGNC Symbol;Acc:21026] | 1.72 | 8.7E-27 |
| RPL5     | ENSG00000122406 | ribosomal protein L5 [Source:HGNC Symbol;Acc:10360]                                 | 1.53 | 1.0E-26 |
| C16orf59 | ENSG00000162062 | chromosome 16 open reading frame 59 [Source:HGNC Symbol;Acc:25849]                  | 3.74 | 1.0E-26 |
| NMNAT3   | ENSG00000163864 | nicotinamide nucleotide adenylyltransferase 3 [Source:HGNC Symbol;Acc:20989]        | 3.10 | 1.1E-26 |
| DIAPH3   | ENSG00000139734 | diaphanous-related formin 3 [Source:HGNC Symbol;Acc:15480]                          | 2.81 | 1.4E-26 |
| --       | ENSG00000242193 | --                                                                                  | 2.04 | 1.5E-26 |
| --       | ENSG00000178430 | --                                                                                  | 2.43 | 1.5E-26 |

|         |                 |                                                                                             |      |         |
|---------|-----------------|---------------------------------------------------------------------------------------------|------|---------|
| CELSR2  | ENSG00000143126 | cadherin, EGF LAG seven-pass G-type receptor 2 [Source:HGNC Symbol;Acc:3231]                | 2.80 | 1.7E-26 |
| CENPN   | ENSG00000166451 | centromere protein N [Source:HGNC Symbol;Acc:30873]                                         | 2.20 | 1.7E-26 |
| NDUFAF4 | ENSG00000123545 | NADH dehydrogenase (ubiquinone) complex I, assembly factor 4 [Source:HGNC Symbol;Acc:21034] | 2.35 | 1.8E-26 |
| MCCC1   | ENSG00000078070 | methylcrotonoyl-CoA carboxylase 1 (alpha) [Source:HGNC Symbol;Acc:6936]                     | 1.97 | 1.9E-26 |
| WDR77   | ENSG00000116455 | WD repeat domain 77 [Source:HGNC Symbol;Acc:29652]                                          | 1.72 | 2.0E-26 |
| GNL3    | ENSG00000163938 | guanine nucleotide binding protein-like 3 (nucleolar) [Source:HGNC Symbol;Acc:29931]        | 1.53 | 2.1E-26 |
| IL17D   | ENSG00000172458 | interleukin 17D [Source:HGNC Symbol;Acc:5984]                                               | 2.57 | 2.9E-26 |
| CENPI   | ENSG00000102384 | centromere protein I [Source:HGNC Symbol;Acc:3968]                                          | 2.73 | 3.0E-26 |
| --      | ENSG00000258301 | --                                                                                          | 2.81 | 3.1E-26 |
| NME1    | ENSG00000239672 | NME/NM23 nucleoside diphosphate kinase 1 [Source:HGNC Symbol;Acc:7849]                      | 2.44 | 3.2E-26 |
| RPS23   | ENSG00000186468 | ribosomal protein S23 [Source:HGNC Symbol;Acc:10410]                                        | 1.49 | 3.7E-26 |
| ASIC1   | ENSG00000110881 | acid-sensing (proton-gated) ion channel 1 [Source:HGNC Symbol;Acc:100]                      | 3.45 | 3.8E-26 |
| POLE2   | ENSG00000100479 | polymerase (DNA directed), epsilon 2, accessory subunit [Source:HGNC Symbol;Acc:9178]       | 2.71 | 4.0E-26 |
| EZH2    | ENSG00000106462 | enhancer of zeste homolog 2 (Drosophila) [Source:HGNC Symbol;Acc:3527]                      | 1.63 | 4.9E-26 |
| PDE7A   | ENSG00000205268 | phosphodiesterase 7A [Source:HGNC Symbol;Acc:8791]                                          | 1.76 | 6.7E-26 |
| R3HDM1  | ENSG00000048991 | R3H domain containing 1 [Source:HGNC Symbol;Acc:9757]                                       | 2.44 | 7.9E-26 |
| SOX8    | ENSG00000005513 | SRY (sex determining region Y)-box 8 [Source:HGNC Symbol;Acc:11203]                         | 4.69 | 7.9E-26 |
| LMNB2   | ENSG00000176619 | lamin B2 [Source:HGNC Symbol;Acc:6638]                                                      | 1.89 | 8.0E-26 |
| TXLNG   | ENSG00000086712 | taxilin gamma [Source:HGNC Symbol;Acc:18578]                                                | 1.93 | 8.7E-26 |

|         |                 |                                                                                               |      |         |
|---------|-----------------|-----------------------------------------------------------------------------------------------|------|---------|
| MARC1   | ENSG00000186205 | mitochondrial amidoxime reducing component 1 [Source:HGNC Symbol;Acc:26189]                   | 2.35 | 9.3E-26 |
| OXCT1   | ENSG00000083720 | 3-oxoacid CoA transferase 1 [Source:HGNC Symbol;Acc:8527]                                     | 2.43 | 1.0E-25 |
| --      | ENSG00000268313 | --                                                                                            | 2.24 | 1.1E-25 |
| UTP14A  | ENSG00000156697 | UTP14, U3 small nucleolar ribonucleoprotein, homolog A (yeast) [Source:HGNC Symbol;Acc:10665] | 1.76 | 1.2E-25 |
| CLNS1A  | ENSG00000074201 | chloride channel, nucleotide-sensitive, 1A [Source:HGNC Symbol;Acc:2080]                      | 1.38 | 1.2E-25 |
| H2AFZ   | ENSG00000164032 | H2A histone family, member Z [Source:HGNC Symbol;Acc:4741]                                    | 1.41 | 1.2E-25 |
| RPS3A   | ENSG00000145425 | ribosomal protein S3A [Source:HGNC Symbol;Acc:10421]                                          | 1.55 | 1.3E-25 |
| HNRNPA1 | ENSG00000135486 | heterogeneous nuclear ribonucleoprotein A1 [Source:HGNC Symbol;Acc:5031]                      | 1.25 | 1.5E-25 |
| RPS4X   | ENSG00000198034 | ribosomal protein S4, X-linked [Source:HGNC Symbol;Acc:10424]                                 | 1.26 | 1.9E-25 |
| POLR1A  | ENSG00000068654 | polymerase (RNA) I polypeptide A, 194kDa [Source:HGNC Symbol;Acc:17264]                       | 1.72 | 2.3E-25 |
| RTKN2   | ENSG00000182010 | rhotekin 2 [Source:HGNC Symbol;Acc:19364]                                                     | 2.38 | 2.5E-25 |
| BRCA2   | ENSG00000139618 | breast cancer 2, early onset [Source:HGNC Symbol;Acc:1101]                                    | 3.85 | 2.7E-25 |
| TSEN2   | ENSG00000154743 | TSEN2 tRNA splicing endonuclease subunit [Source:HGNC Symbol;Acc:28422]                       | 2.14 | 3.5E-25 |
| LEFTY1  | ENSG00000243709 | left-right determination factor 1 [Source:HGNC Symbol;Acc:6552]                               | 2.72 | 4.0E-25 |
| RPL10A  | ENSG00000198755 | ribosomal protein L10a [Source:HGNC Symbol;Acc:10299]                                         | 1.23 | 4.5E-25 |
| GSTO2   | ENSG00000065621 | glutathione S-transferase omega 2 [Source:HGNC Symbol;Acc:23064]                              | 1.97 | 4.6E-25 |
| ILF3    | ENSG00000129351 | interleukin enhancer binding factor 3, 90kDa [Source:HGNC Symbol;Acc:6038]                    | 1.28 | 5.6E-25 |
| POLE3   | ENSG00000148229 | polymerase (DNA directed), epsilon 3, accessory subunit [Source:HGNC Symbol;Acc:13546]        | 1.54 | 7.0E-25 |
| ZNF511  | ENSG00000198546 | zinc finger protein 511 [Source:HGNC Symbol;Acc:28445]                                        | 1.92 | 7.3E-25 |
| FAM98B  | ENSG00000171262 | family with sequence similarity 98, member B [Source:HGNC Symbol;Acc:26773]                   | 1.94 | 7.9E-25 |

|         |                 |                                                                                                |      |         |
|---------|-----------------|------------------------------------------------------------------------------------------------|------|---------|
| FAH     | ENSG00000103876 | fumarylacetoacetate hydrolase (fumarylacetoacetase) [Source:HGNC Symbol;Acc:3579]              | 1.91 | 8.0E-25 |
| ADCY3   | ENSG00000138031 | adenylate cyclase 3 [Source:HGNC Symbol;Acc:234]                                               | 2.04 | 8.3E-25 |
| PAK1IP1 | ENSG00000111845 | PAK1 interacting protein 1 [Source:HGNC Symbol;Acc:20882]                                      | 1.76 | 8.3E-25 |
| CKAP2L  | ENSG00000169607 | cytoskeleton associated protein 2-like [Source:HGNC Symbol;Acc:26877]                          | 2.45 | 9.1E-25 |
| SLC43A3 | ENSG00000134802 | solute carrier family 43, member 3 [Source:HGNC Symbol;Acc:17466]                              | 4.05 | 9.6E-25 |
| ATG10   | ENSG00000152348 | autophagy related 10 [Source:HGNC Symbol;Acc:20315]                                            | 1.44 | 1.1E-24 |
| MDC1    | ENSG00000137337 | mediator of DNA-damage checkpoint 1 [Source:HGNC Symbol;Acc:21163]                             | 2.35 | 1.5E-24 |
| TIMM8A  | ENSG00000126953 | translocase of inner mitochondrial membrane 8 homolog A (yeast) [Source:HGNC Symbol;Acc:11817] | 2.11 | 2.2E-24 |
| RPS2P46 | ENSG00000189343 | ribosomal protein S2 pseudogene 46 [Source:HGNC Symbol;Acc:35839]                              | 1.75 | 2.6E-24 |
| CCDC86  | ENSG00000110104 | coiled-coil domain containing 86 [Source:HGNC Symbol;Acc:28359]                                | 1.95 | 3.5E-24 |
| ODC1    | ENSG00000115758 | ornithine decarboxylase 1 [Source:HGNC Symbol;Acc:8109]                                        | 1.47 | 4.6E-24 |
| PRTFDC1 | ENSG00000099256 | phosphoribosyl transferase domain containing 1 [Source:HGNC Symbol;Acc:23333]                  | 2.04 | 4.9E-24 |
| EXOSC9  | ENSG00000123737 | exosome component 9 [Source:HGNC Symbol;Acc:9137]                                              | 2.11 | 5.1E-24 |
| TBC1D4  | ENSG00000136111 | TBC1 domain family, member 4 [Source:HGNC Symbol;Acc:19165]                                    | 2.16 | 5.3E-24 |
| EIF2D   | ENSG00000143486 | eukaryotic translation initiation factor 2D [Source:HGNC Symbol;Acc:6583]                      | 1.52 | 6.4E-24 |
| PELP1   | ENSG00000141456 | proline, glutamate and leucine rich protein 1 [Source:HGNC Symbol;Acc:30134]                   | 2.14 | 6.8E-24 |
| TOP1MT  | ENSG00000184428 | topoisomerase (DNA) I, mitochondrial [Source:HGNC Symbol;Acc:29787]                            | 2.33 | 6.9E-24 |
| CCDC41  | ENSG00000173588 | coiled-coil domain containing 41 [Source:HGNC Symbol;Acc:17966]                                | 2.16 | 7.7E-24 |
| BCS1L   | ENSG00000074582 | BC1 (ubiquinol-cytochrome c reductase) synthesis-like [Source:HGNC Symbol;Acc:1020]            | 1.90 | 8.4E-24 |

|           |                 |                                                                                                                                               |      |         |
|-----------|-----------------|-----------------------------------------------------------------------------------------------------------------------------------------------|------|---------|
| PSPH      | ENSG00000146733 | phosphoserine phosphatase [Source:HGNC Symbol;Acc:9577]<br>RNA pseudouridylate synthase domain containing 4 [Source:HGNC<br>Symbol;Acc:25898] | 2.11 | 1.0E-23 |
| RPUSD4    | ENSG00000165526 | chromosome 21 open reading frame 58 [Source:HGNC<br>Symbol;Acc:1300]                                                                          | 1.36 | 1.1E-23 |
| C21orf58  | ENSG00000160298 | chromosome 20 open reading frame 27 [Source:HGNC<br>Symbol;Acc:15873]                                                                         | 3.77 | 1.2E-23 |
| C20orf27  | ENSG00000101220 | poly (ADP-ribose) polymerase 2 [Source:HGNC Symbol;Acc:272]                                                                                   | 2.56 | 1.2E-23 |
| PARP2     | ENSG00000129484 | transmembrane protein 109 [Source:HGNC Symbol;Acc:28771]                                                                                      | 1.63 | 1.2E-23 |
| TMEM109   | ENSG00000110108 | DEAD (Asp-Glu-Ala-Asp) box polypeptide 55 [Source:HGNC<br>Symbol;Acc:20085]                                                                   | 2.01 | 1.2E-23 |
| DDX55     | ENSG00000111364 | zinc finger protein 239 [Source:HGNC Symbol;Acc:13031]                                                                                        | 1.51 | 1.3E-23 |
| ZNF239    | ENSG00000196793 | ribosomal protein SA [Source:HGNC Symbol;Acc:6502]                                                                                            | 3.16 | 1.3E-23 |
| RPSA      | ENSG00000168028 | ring finger protein 157 [Source:HGNC Symbol;Acc:29402]                                                                                        | 1.56 | 1.4E-23 |
| RNF157    | ENSG00000141576 | nucleoporin 37kDa [Source:HGNC Symbol;Acc:29929]                                                                                              | 1.58 | 1.8E-23 |
| NUP37     | ENSG00000075188 | cytochrome P450, family 2, subfamily W, polypeptide 1 [Source:HGNC<br>Symbol;Acc:20243]                                                       | 1.50 | 2.0E-23 |
| CYP2W1    | ENSG00000073067 | eukaryotic translation elongation factor 1 beta 2 [Source:HGNC<br>Symbol;Acc:3208]                                                            | 2.90 | 2.5E-23 |
| EEF1B2    | ENSG00000114942 | TP53 regulated inhibitor of apoptosis 1 [Source:HGNC<br>Symbol;Acc:26937]                                                                     | 1.39 | 2.8E-23 |
| TRIAP1    | ENSG00000170855 | apoptosis-inducing factor, mitochondrion-associated, 1 [Source:HGNC<br>Symbol;Acc:8768]                                                       | 1.83 | 3.3E-23 |
| AIFM1     | ENSG00000156709 | Rho GTPase activating protein 11B [Source:HGNC Symbol;Acc:15782]                                                                              | 1.34 | 3.9E-23 |
| ARHGAP11B | ENSG00000187951 | prohibitin 2 [Source:HGNC Symbol;Acc:30306]                                                                                                   | 3.20 | 4.2E-23 |
| PHB2      | ENSG00000215021 | nuclear casein kinase and cyclin-dependent kinase substrate 1<br>[Source:HGNC Symbol;Acc:29923]                                               | 1.38 | 4.3E-23 |
| NUCKS1    | ENSG00000069275 | leucine rich repeat protein 1 [Source:HGNC Symbol;Acc:19742]                                                                                  | 1.92 | 4.5E-23 |
| LRR1      | ENSG00000165501 | --                                                                                                                                            | 1.53 | 5.4E-23 |
| --        | ENSG00000253414 | --                                                                                                                                            | 4.13 | 5.5E-23 |



|          |                 |                                                                                                        |      |         |
|----------|-----------------|--------------------------------------------------------------------------------------------------------|------|---------|
| TCEA3    | ENSG00000204219 | transcription elongation factor A (SII), 3 [Source:HGNC Symbol;Acc:11615]                              | 1.75 | 6.0E-23 |
| IL17RB   | ENSG00000056736 | interleukin 17 receptor B [Source:HGNC Symbol;Acc:18015]                                               | 1.73 | 6.1E-23 |
| UAP1L1   | ENSG00000197355 | UDP-N-acteylglucosamine pyrophosphorylase 1-like 1 [Source:HGNC Symbol;Acc:28082]                      | 1.64 | 6.2E-23 |
| GEMIN5   | ENSG00000082516 | gem (nuclear organelle) associated protein 5 [Source:HGNC Symbol;Acc:20043]                            | 2.40 | 6.7E-23 |
| SLC25A27 | ENSG00000153291 | solute carrier family 25, member 27 [Source:HGNC Symbol;Acc:21065]                                     | 3.98 | 8.1E-23 |
| MRPL17   | ENSG00000158042 | mitochondrial ribosomal protein L17 [Source:HGNC Symbol;Acc:14053]                                     | 1.51 | 8.5E-23 |
| FRAT2    | ENSG00000181274 | frequently rearranged in advanced T-cell lymphomas 2 [Source:HGNC Symbol;Acc:16048]                    | 2.12 | 8.9E-23 |
| SLC12A8  | ENSG00000221955 | solute carrier family 12, member 8 [Source:HGNC Symbol;Acc:15595]                                      | 1.67 | 9.6E-23 |
| SOX12    | ENSG00000177732 | SRY (sex determining region Y)-box 12 [Source:HGNC Symbol;Acc:11198]                                   | 2.32 | 9.9E-23 |
| LSM5     | ENSG00000106355 | LSM5 homolog, U6 small nuclear RNA associated ( <i>S. cerevisiae</i> ) [Source:HGNC Symbol;Acc:17162]  | 1.93 | 1.0E-22 |
| NRM      | ENSG00000137404 | nurim (nuclear envelope membrane protein) [Source:HGNC Symbol;Acc:8003]                                | 2.03 | 1.1E-22 |
| H2AFV    | ENSG00000105968 | H2A histone family, member V [Source:HGNC Symbol;Acc:20664]                                            | 1.50 | 1.1E-22 |
| APLN     | ENSG00000171388 | apelin [Source:HGNC Symbol;Acc:16665]                                                                  | 3.93 | 1.1E-22 |
| RCL1     | ENSG00000120158 | RNA terminal phosphate cyclase-like 1 [Source:HGNC Symbol;Acc:17687]                                   | 1.96 | 1.1E-22 |
| ACN9     | ENSG00000196636 | ACN9 homolog ( <i>S. cerevisiae</i> ) [Source:HGNC Symbol;Acc:21752]                                   | 2.93 | 1.2E-22 |
| DDC      | ENSG00000132437 | dopa decarboxylase (aromatic L-amino acid decarboxylase) [Source:HGNC Symbol;Acc:2719]                 | 1.67 | 1.3E-22 |
| AIMP2    | ENSG00000106305 | aminoacyl tRNA synthetase complex-interacting multifunctional protein 2 [Source:HGNC Symbol;Acc:20609] | 1.34 | 1.3E-22 |

|           |                 |                                                                                           |      |         |
|-----------|-----------------|-------------------------------------------------------------------------------------------|------|---------|
| PRPS1     | ENSG00000147224 | phosphoribosyl pyrophosphate synthetase 1 [Source:HGNC Symbol;Acc:9462]                   | 2.53 | 1.7E-22 |
| INCENP    | ENSG00000149503 | inner centromere protein antigens 135/155kDa [Source:HGNC Symbol;Acc:6058]                | 1.96 | 1.8E-22 |
| TRAF5     | ENSG00000082512 | TNF receptor-associated factor 5 [Source:HGNC Symbol;Acc:12035]                           | 1.68 | 1.9E-22 |
| GAR1      | ENSG00000109534 | GAR1 ribonucleoprotein [Source:HGNC Symbol;Acc:14264]                                     | 1.70 | 2.0E-22 |
| CERS6-AS1 | ENSG00000227617 | CERS6 antisense RNA 1 [Source:HGNC Symbol;Acc:44485]                                      | 1.72 | 2.3E-22 |
| PTCD3     | ENSG00000132300 | pentatricopeptide repeat domain 3 [Source:HGNC Symbol;Acc:24717]                          | 1.41 | 2.4E-22 |
| MPHOSPH9  | ENSG00000051825 | M-phase phosphoprotein 9 [Source:HGNC Symbol;Acc:7215]                                    | 2.80 | 2.5E-22 |
| C12orf45  | ENSG00000151131 | chromosome 12 open reading frame 45 [Source:HGNC Symbol;Acc:28628]                        | 1.94 | 2.7E-22 |
| NUDT1     | ENSG00000106268 | nudix (nucleoside diphosphate linked moiety X)-type motif 1 [Source:HGNC Symbol;Acc:8048] | 2.35 | 2.8E-22 |
| PPIH      | ENSG00000171960 | peptidylprolyl isomerase H (cyclophilin H) [Source:HGNC Symbol;Acc:14651]                 | 2.01 | 2.8E-22 |
| C11orf1   | ENSG00000137720 | chromosome 11 open reading frame 1 [Source:HGNC Symbol;Acc:1163]                          | 1.72 | 3.8E-22 |
| FANCI     | ENSG00000140525 | Fanconi anemia, complementation group I [Source:HGNC Symbol;Acc:25568]                    | 1.36 | 3.9E-22 |
| RPL23A    | ENSG00000198242 | ribosomal protein L23a [Source:HGNC Symbol;Acc:10317]                                     | 1.27 | 4.3E-22 |
| NABP2     | ENSG00000139579 | nucleic acid binding protein 2 [Source:HGNC Symbol;Acc:28412]                             | 1.79 | 5.0E-22 |
| LTV1      | ENSG00000135521 | LTV1 homolog ( <i>S. cerevisiae</i> ) [Source:HGNC Symbol;Acc:21173]                      | 1.89 | 5.4E-22 |
| CKS1B     | ENSG00000173207 | CDC28 protein kinase regulatory subunit 1B [Source:HGNC Symbol;Acc:19083]                 | 1.57 | 5.7E-22 |
| PIGM      | ENSG00000143315 | phosphatidylinositol glycan anchor biosynthesis, class M [Source:HGNC Symbol;Acc:18858]   | 2.11 | 6.0E-22 |
| OSGEPL1   | ENSG00000128694 | O-sialoglycoprotein endopeptidase-like 1 [Source:HGNC Symbol;Acc:23075]                   | 3.08 | 6.0E-22 |

|         |                 |                                                                                                          |      |         |
|---------|-----------------|----------------------------------------------------------------------------------------------------------|------|---------|
| ITGB3BP | ENSG00000142856 | integrin beta 3 binding protein (beta3-endonexin) [Source:HGNC Symbol;Acc:6157]                          | 2.62 | 6.1E-22 |
| WDR76   | ENSG00000092470 | WD repeat domain 76 [Source:HGNC Symbol;Acc:25773]                                                       | 2.26 | 6.9E-22 |
| CTSC    | ENSG00000109861 | cathepsin C [Source:HGNC Symbol;Acc:2528]                                                                | 1.59 | 7.9E-22 |
| TSR1    | ENSG00000167721 | TSR1, 20S rRNA accumulation, homolog (S. cerevisiae) [Source:HGNC Symbol;Acc:25542]                      | 1.32 | 8.0E-22 |
| PRMT6   | ENSG00000198890 | protein arginine methyltransferase 6 [Source:HGNC Symbol;Acc:18241]                                      | 2.60 | 8.9E-22 |
| MRPS33  | ENSG00000090263 | mitochondrial ribosomal protein S33 [Source:HGNC Symbol;Acc:16634]                                       | 1.52 | 9.2E-22 |
| HLTF    | ENSG00000071794 | helicase-like transcription factor [Source:HGNC Symbol;Acc:11099]                                        | 2.71 | 1.0E-21 |
| POC1A   | ENSG00000164087 | POC1 centriolar protein A [Source:HGNC Symbol;Acc:24488]                                                 | 1.63 | 1.2E-21 |
| HRSP12  | ENSG00000132541 | heat-responsive protein 12 [Source:HGNC Symbol;Acc:16897]                                                | 1.93 | 1.2E-21 |
| --      | ENSG00000170846 | --                                                                                                       | 1.88 | 1.3E-21 |
| SLC28A3 | ENSG00000197506 | solute carrier family 28 (concentrative nucleoside transporter), member 3 [Source:HGNC Symbol;Acc:16484] | 1.86 | 1.7E-21 |
| PEX5    | ENSG00000139197 | peroxisomal biogenesis factor 5 [Source:HGNC Symbol;Acc:9719]                                            | 1.44 | 1.9E-21 |
| ANAPC5  | ENSG00000089053 | anaphase promoting complex subunit 5 [Source:HGNC Symbol;Acc:15713]                                      | 1.17 | 2.0E-21 |
| SNRNP25 | ENSG00000161981 | small nuclear ribonucleoprotein 25kDa (U11/U12) [Source:HGNC Symbol;Acc:14161]                           | 2.12 | 2.2E-21 |
| RPL4    | ENSG00000174444 | ribosomal protein L4 [Source:HGNC Symbol;Acc:10353]                                                      | 1.38 | 2.3E-21 |
| FEZF1   | ENSG00000128610 | FEZ family zinc finger 1 [Source:HGNC Symbol;Acc:22788]                                                  | 2.42 | 2.3E-21 |
| --      | ENSG00000257553 | --                                                                                                       | 1.61 | 2.7E-21 |
| POLD2   | ENSG00000106628 | polymerase (DNA directed), delta 2, accessory subunit [Source:HGNC Symbol;Acc:9176]                      | 1.68 | 2.8E-21 |
| FYN     | ENSG00000010810 | FYN oncogene related to SRC, FGR, YES [Source:HGNC Symbol;Acc:4037]                                      | 2.03 | 3.0E-21 |
| DNA2    | ENSG00000138346 | DNA replication helicase/nuclease 2 [Source:HGNC Symbol;Acc:2939]                                        | 2.34 | 3.1E-21 |

|         |                 |                                                                            |      |         |
|---------|-----------------|----------------------------------------------------------------------------|------|---------|
| GLRX5   | ENSG00000182512 | glutaredoxin 5 [Source:HGNC Symbol;Acc:20134]                              | 1.18 | 3.1E-21 |
| RAD54L  | ENSG00000085999 | RAD54-like ( <i>S. cerevisiae</i> ) [Source:HGNC Symbol;Acc:9826]          | 1.93 | 3.3E-21 |
| GDF11   | ENSG00000135414 | growth differentiation factor 11 [Source:HGNC Symbol;Acc:4216]             | 2.76 | 3.4E-21 |
| QSOX2   | ENSG00000165661 | quiescin Q6 sulfhydryl oxidase 2 [Source:HGNC Symbol;Acc:30249]            | 1.79 | 3.5E-21 |
|         |                 | small nuclear ribonucleoprotein D2 polypeptide 16.5kDa                     |      |         |
| SNRPD2  | ENSG00000125743 | [Source:HGNC Symbol;Acc:11159]                                             | 1.37 | 3.6E-21 |
| RRP1B   | ENSG00000160208 | ribosomal RNA processing 1B [Source:HGNC Symbol;Acc:23818]                 | 1.70 | 4.2E-21 |
|         |                 | transcription factor B2, mitochondrial [Source:HGNC                        |      |         |
| TFB2M   | ENSG00000162851 | Symbol;Acc:18559]                                                          | 1.88 | 4.4E-21 |
| --      | ENSG00000253174 | --                                                                         | 3.63 | 4.7E-21 |
| RPL22   | ENSG00000116251 | ribosomal protein L22 [Source:HGNC Symbol;Acc:10315]                       | 1.63 | 4.9E-21 |
|         |                 | family with sequence similarity 96, member A [Source:HGNC                  |      |         |
| FAM96A  | ENSG00000166797 | Symbol;Acc:26235]                                                          | 1.56 | 5.0E-21 |
|         |                 | suppressor of variegation 3-9 homolog 2 ( <i>Drosophila</i> ) [Source:HGNC |      |         |
| SUV39H2 | ENSG00000152455 | Symbol;Acc:17287]                                                          | 1.94 | 5.5E-21 |
|         |                 | signal recognition particle receptor, B subunit [Source:HGNC               |      |         |
| SRPRB   | ENSG00000144867 | Symbol;Acc:24085]                                                          | 1.48 | 5.6E-21 |
|         |                 | NIN1/RPN12 binding protein 1 homolog ( <i>S. cerevisiae</i> ) [Source:HGNC |      |         |
| NOB1    | ENSG00000141101 | Symbol;Acc:29540]                                                          | 1.48 | 5.7E-21 |
| NUBPL   | ENSG00000151413 | nucleotide binding protein-like [Source:HGNC Symbol;Acc:20278]             | 2.41 | 6.2E-21 |
|         |                 | mitochondrial genome maintenance exonuclease 1 [Source:HGNC                |      |         |
| MGME1   | ENSG00000125871 | Symbol;Acc:16205]                                                          | 1.56 | 6.3E-21 |
|         |                 | translocase of inner mitochondrial membrane 21 homolog (yeast)             |      |         |
| TIMM21  | ENSG00000075336 | [Source:HGNC Symbol;Acc:25010]                                             | 1.84 | 7.0E-21 |
|         |                 | ATP-binding cassette, sub-family E (OABP), member 1 [Source:HGNC           |      |         |
| ABCE1   | ENSG00000164163 | Symbol;Acc:69]                                                             | 2.03 | 7.5E-21 |
|         |                 | cyclin-dependent kinase inhibitor 2C (p18, inhibits CDK4)                  |      |         |
| CDKN2C  | ENSG00000123080 | [Source:HGNC Symbol;Acc:1789]                                              | 2.62 | 8.6E-21 |

|          |                 |                                                                                                        |      |         |
|----------|-----------------|--------------------------------------------------------------------------------------------------------|------|---------|
| MCCC2    | ENSG00000131844 | methylcrotonoyl-CoA carboxylase 2 (beta) [Source:HGNC Symbol;Acc:6937]                                 | 1.67 | 8.8E-21 |
| USP28    | ENSG00000048028 | ubiquitin specific peptidase 28 [Source:HGNC Symbol;Acc:12625]                                         | 1.79 | 9.2E-21 |
| SAAL1    | ENSG00000166788 | serum amyloid A-like 1 [Source:HGNC Symbol;Acc:25158]                                                  | 1.87 | 9.3E-21 |
| RHNO1    | ENSG00000171792 | RAD9-HUS1-RAD1 interacting nuclear orphan 1 [Source:HGNC Symbol;Acc:28206]                             | 1.64 | 1.0E-20 |
| RBMX     | ENSG00000147274 | RNA binding motif protein, X-linked [Source:HGNC Symbol;Acc:9910]                                      | 1.41 | 1.1E-20 |
| --       | ENSG00000251018 | --                                                                                                     | 3.88 | 1.2E-20 |
| NRGN     | ENSG00000154146 | neurogranin (protein kinase C substrate, RC3) [Source:HGNC Symbol;Acc:8000]                            | 3.52 | 1.3E-20 |
| ADSL     | ENSG00000239900 | adenylosuccinate lyase [Source:HGNC Symbol;Acc:291]                                                    | 1.87 | 1.3E-20 |
| RPIA     | ENSG00000153574 | ribose 5-phosphate isomerase A [Source:HGNC Symbol;Acc:10297]                                          | 1.55 | 1.4E-20 |
| TYSND1   | ENSG00000156521 | trypsin domain containing 1 [Source:HGNC Symbol;Acc:28531]                                             | 1.78 | 1.4E-20 |
| SNHG1    | ENSG00000255717 | small nucleolar RNA host gene 1 (non-protein coding) [Source:HGNC Symbol;Acc:32688]                    | 1.43 | 1.4E-20 |
| AGMAT    | ENSG00000116771 | agmatine ureohydrolase (agmatinase) [Source:HGNC Symbol;Acc:18407]                                     | 2.28 | 1.5E-20 |
| LRRC20   | ENSG00000172731 | leucine rich repeat containing 20 [Source:HGNC Symbol;Acc:23421]                                       | 2.41 | 1.7E-20 |
| BOD1     | ENSG00000145919 | biorientation of chromosomes in cell division 1 [Source:HGNC Symbol;Acc:25114]                         | 1.54 | 2.0E-20 |
| C19orf48 | ENSG00000167747 | chromosome 19 open reading frame 48 [Source:HGNC Symbol;Acc:29667]                                     | 2.47 | 2.1E-20 |
| GGH      | ENSG00000137563 | gamma-glutamyl hydrolase (conjugase, folylpolyglutamylyl hydrolase) [Source:HGNC Symbol;Acc:4248]      | 1.92 | 2.1E-20 |
| NOP58    | ENSG00000055044 | NOP58 ribonucleoprotein [Source:HGNC Symbol;Acc:29926]                                                 | 1.96 | 2.1E-20 |
| BIVM     | ENSG00000134897 | basic, immunoglobulin-like variable motif containing [Source:HGNC Symbol;Acc:16034]                    | 2.06 | 2.3E-20 |
| MRM1     | ENSG00000129282 | mitochondrial rRNA methyltransferase 1 homolog ( <i>S. cerevisiae</i> ) [Source:HGNC Symbol;Acc:26202] | 2.53 | 2.3E-20 |

|         |                 |                                                                                                                 |      |         |
|---------|-----------------|-----------------------------------------------------------------------------------------------------------------|------|---------|
| DDX10   | ENSG00000178105 | DEAD (Asp-Glu-Ala-Asp) box polypeptide 10 [Source:HGNC Symbol;Acc:2735]                                         | 1.73 | 2.5E-20 |
| TYW3    | ENSG00000162623 | tRNA-yW synthesizing protein 3 homolog (S. cerevisiae) [Source:HGNC Symbol;Acc:24757]                           | 2.05 | 2.5E-20 |
| CHRNA5  | ENSG00000169684 | cholinergic receptor, nicotinic, alpha 5 (neuronal) [Source:HGNC Symbol;Acc:1959]                               | 5.11 | 2.7E-20 |
| CHCHD4  | ENSG00000163528 | coiled-coil-helix-coiled-coil-helix domain containing 4 [Source:HGNC Symbol;Acc:26467]                          | 1.47 | 2.7E-20 |
| PABPC1L | ENSG00000101104 | poly(A) binding protein, cytoplasmic 1-like [Source:HGNC Symbol;Acc:15797]                                      | 1.67 | 2.8E-20 |
| SFXN4   | ENSG00000183605 | sideroflexin 4 [Source:HGNC Symbol;Acc:16088]                                                                   | 1.78 | 3.2E-20 |
| NXT1    | ENSG00000132661 | NTF2-like export factor 1 [Source:HGNC Symbol;Acc:15913]                                                        | 1.44 | 3.5E-20 |
| IMP4    | ENSG00000136718 | IMP4, U3 small nucleolar ribonucleoprotein, homolog (yeast) [Source:HGNC Symbol;Acc:30856]                      | 1.58 | 3.9E-20 |
| E2F1    | ENSG00000101412 | E2F transcription factor 1 [Source:HGNC Symbol;Acc:3113]                                                        | 2.27 | 4.2E-20 |
| SLC1A4  | ENSG00000115902 | solute carrier family 1 (glutamate/neutral amino acid transporter), member 4 [Source:HGNC Symbol;Acc:10942]     | 2.31 | 4.3E-20 |
| SLC7A8  | ENSG00000092068 | solute carrier family 7 (amino acid transporter light chain, L system), member 8 [Source:HGNC Symbol;Acc:11066] | 1.78 | 4.3E-20 |
| ALKBH2  | ENSG00000189046 | alkB, alkylation repair homolog 2 (E. coli) [Source:HGNC Symbol;Acc:32487]                                      | 2.34 | 4.3E-20 |
| --      | ENSG00000231864 | --                                                                                                              | 3.34 | 4.4E-20 |
| BOLA3   | ENSG00000163170 | bolA family member 3 [Source:HGNC Symbol;Acc:24415]                                                             | 1.75 | 4.5E-20 |
| --      | ENSG00000232445 | --                                                                                                              | 3.08 | 4.5E-20 |
| RAD51C  | ENSG00000108384 | RAD51 paralog C [Source:HGNC Symbol;Acc:9820]                                                                   | 2.24 | 4.5E-20 |
| --      | ENSG00000236081 | --                                                                                                              | 3.91 | 4.7E-20 |
| NEIL3   | ENSG00000109674 | nei endonuclease VIII-like 3 (E. coli) [Source:HGNC Symbol;Acc:24573]                                           | 5.07 | 4.7E-20 |
| EN2     | ENSG00000164778 | engrailed homeobox 2 [Source:HGNC Symbol;Acc:3343]                                                              | 2.23 | 4.9E-20 |

|         |                 |                                                                                                       |      |         |
|---------|-----------------|-------------------------------------------------------------------------------------------------------|------|---------|
| CREG1   | ENSG00000143162 | cellular repressor of E1A-stimulated genes 1 [Source:HGNC Symbol;Acc:2351]                            | 1.68 | 4.9E-20 |
| NOX1    | ENSG00000007952 | NADPH oxidase 1 [Source:HGNC Symbol;Acc:7889]                                                         | 1.93 | 5.1E-20 |
| CENPM   | ENSG00000100162 | centromere protein M [Source:HGNC Symbol;Acc:18352]                                                   | 2.93 | 5.3E-20 |
| GGA2    | ENSG00000103365 | golgi-associated, gamma adaptin ear containing, ARF binding protein 2 [Source:HGNC Symbol;Acc:16064]  | 1.19 | 5.3E-20 |
| BAG2    | ENSG00000112208 | BCL2-associated athanogene 2 [Source:HGNC Symbol;Acc:938]                                             | 2.09 | 5.8E-20 |
| STXBP6  | ENSG00000168952 | syntaxin binding protein 6 (amisyn) [Source:HGNC Symbol;Acc:19666]                                    | 1.88 | 5.9E-20 |
| MTURN   | ENSG00000180354 | maturin, neural progenitor differentiation regulator homolog (Xenopus) [Source:HGNC Symbol;Acc:25457] | 1.76 | 7.5E-20 |
| PLEKHS1 | ENSG00000148735 | pleckstrin homology domain containing, family S member 1 [Source:HGNC Symbol;Acc:26285]               | 1.61 | 7.6E-20 |
| NOL6    | ENSG00000165271 | nucleolar protein 6 (RNA-associated) [Source:HGNC Symbol;Acc:19910]                                   | 1.76 | 7.9E-20 |
| SNHG15  | ENSG00000232956 | small nucleolar RNA host gene 15 (non-protein coding) [Source:HGNC Symbol;Acc:27797]                  | 1.54 | 8.0E-20 |
| PTDSS1  | ENSG00000156471 | phosphatidylserine synthase 1 [Source:HGNC Symbol;Acc:9587]                                           | 1.51 | 8.0E-20 |
| C5orf34 | ENSG00000172244 | chromosome 5 open reading frame 34 [Source:HGNC Symbol;Acc:24738]                                     | 3.05 | 9.4E-20 |
| GINS3   | ENSG00000181938 | GINS complex subunit 3 (Psf3 homolog) [Source:HGNC Symbol;Acc:25851]                                  | 2.77 | 9.9E-20 |
| POLR2G  | ENSG00000168002 | polymerase (RNA) II (DNA directed) polypeptide G [Source:HGNC Symbol;Acc:9194]                        | 1.45 | 1.1E-19 |
| ACPL2   | ENSG00000155893 | acid phosphatase-like 2 [Source:HGNC Symbol;Acc:26303]                                                | 2.00 | 1.1E-19 |
| --      | ENSG00000254662 | --                                                                                                    | 1.86 | 1.1E-19 |
| BZW2    | ENSG00000136261 | basic leucine zipper and W2 domains 2 [Source:HGNC Symbol;Acc:18808]                                  | 1.39 | 1.2E-19 |

|         |                 |                                                                                                              |      |         |
|---------|-----------------|--------------------------------------------------------------------------------------------------------------|------|---------|
| KNSTRN  | ENSG00000128944 | kinetochore-localized astrin/SPAG5 binding protein [Source:HGNC Symbol;Acc:30767]                            | 1.82 | 1.3E-19 |
| POLR1C  | ENSG00000171453 | polymerase (RNA) I polypeptide C, 30kDa [Source:HGNC Symbol;Acc:20194]                                       | 1.63 | 1.4E-19 |
| ABHD10  | ENSG00000144827 | abhydrolase domain containing 10 [Source:HGNC Symbol;Acc:25656]                                              | 1.90 | 1.5E-19 |
| RSL1D1  | ENSG00000171490 | ribosomal L1 domain containing 1 [Source:HGNC Symbol;Acc:24534]                                              | 1.74 | 1.5E-19 |
| SGOL2   | ENSG00000163535 | shugoshin-like 2 (S. pombe) [Source:HGNC Symbol;Acc:30812]                                                   | 2.70 | 1.9E-19 |
| RPS12   | ENSG00000112306 | ribosomal protein S12 [Source:HGNC Symbol;Acc:10385]                                                         | 1.14 | 2.0E-19 |
| TP73    | ENSG00000078900 | tumor protein p73 [Source:HGNC Symbol;Acc:12003]                                                             | 3.17 | 2.1E-19 |
| TIMM10  | ENSG00000134809 | translocase of inner mitochondrial membrane 10 homolog (yeast) [Source:HGNC Symbol;Acc:11814]                | 1.80 | 2.2E-19 |
| ENTPD1  | ENSG00000138185 | ectonucleoside triphosphate diphosphohydrolase 1 [Source:HGNC Symbol;Acc:3363]                               | 2.35 | 2.2E-19 |
| CHAF1A  | ENSG00000167670 | chromatin assembly factor 1, subunit A (p150) [Source:HGNC Symbol;Acc:1910]                                  | 1.95 | 2.7E-19 |
| ATP5G1  | ENSG00000159199 | ATP synthase, H+ transporting, mitochondrial Fo complex, subunit C1 (subunit 9) [Source:HGNC Symbol;Acc:841] | 1.82 | 3.1E-19 |
| KIF9    | ENSG00000088727 | kinesin family member 9 [Source:HGNC Symbol;Acc:16666]                                                       | 1.86 | 3.2E-19 |
| GCSH    | ENSG00000140905 | glycine cleavage system protein H (aminomethyl carrier) [Source:HGNC Symbol;Acc:4208]                        | 2.39 | 3.5E-19 |
| WDR43   | ENSG00000163811 | WD repeat domain 43 [Source:HGNC Symbol;Acc:28945]                                                           | 1.70 | 3.7E-19 |
| DDX20   | ENSG00000064703 | DEAD (Asp-Glu-Ala-Asp) box polypeptide 20 [Source:HGNC Symbol;Acc:2743]                                      | 1.58 | 3.7E-19 |
| DCLRE1B | ENSG00000118655 | DNA cross-link repair 1B [Source:HGNC Symbol;Acc:17641]                                                      | 1.89 | 4.3E-19 |
| RASL11A | ENSG00000122035 | RAS-like, family 11, member A [Source:HGNC Symbol;Acc:23802]                                                 | 1.58 | 4.3E-19 |
| --      | ENSG00000269609 | --                                                                                                           | 1.53 | 4.5E-19 |
| UCP2    | ENSG00000175567 | uncoupling protein 2 (mitochondrial, proton carrier) [Source:HGNC Symbol;Acc:12518]                          | 1.50 | 4.5E-19 |



|          |                 |                                                                                                                                             |      |         |
|----------|-----------------|---------------------------------------------------------------------------------------------------------------------------------------------|------|---------|
| PRKDC    | ENSG00000253729 | protein kinase, DNA-activated, catalytic polypeptide [Source:HGNC Symbol;Acc:9413]                                                          | 1.92 | 4.7E-19 |
| FADS1    | ENSG00000149485 | fatty acid desaturase 1 [Source:HGNC Symbol;Acc:3574]                                                                                       | 1.98 | 4.9E-19 |
| GPATCH4  | ENSG00000160818 | G patch domain containing 4 [Source:HGNC Symbol;Acc:25982]                                                                                  | 1.51 | 5.0E-19 |
| HSPE1    | ENSG00000115541 | heat shock 10kDa protein 1 [Source:HGNC Symbol;Acc:5269]                                                                                    | 1.81 | 5.0E-19 |
| KIAA0020 | ENSG00000080608 | KIAA0020 [Source:HGNC Symbol;Acc:29676]                                                                                                     | 1.74 | 5.7E-19 |
| MCMDC2   | ENSG00000178460 | minichromosome maintenance domain containing 2 [Source:HGNC Symbol;Acc:26368]                                                               | 1.73 | 5.7E-19 |
| CDCA4    | ENSG00000170779 | cell division cycle associated 4 [Source:HGNC Symbol;Acc:14625]                                                                             | 1.50 | 6.0E-19 |
| LANCL1   | ENSG00000115365 | LanC lantibiotic synthetase component C-like 1 (bacterial) [Source:HGNC Symbol;Acc:6508]                                                    | 2.03 | 6.2E-19 |
| PKD2     | ENSG00000118762 | polycystic kidney disease 2 (autosomal dominant) [Source:HGNC Symbol;Acc:9009]                                                              | 3.21 | 6.2E-19 |
| GYG2     | ENSG00000056998 | glycogenin 2 [Source:HGNC Symbol;Acc:4700]                                                                                                  | 2.28 | 6.7E-19 |
| URB1     | ENSG00000142207 | URB1 ribosome biogenesis 1 homolog ( <i>S. cerevisiae</i> ) [Source:HGNC Symbol;Acc:17344]                                                  | 1.80 | 7.0E-19 |
| ACADSB   | ENSG00000196177 | acyl-CoA dehydrogenase, short/branched chain [Source:HGNC Symbol;Acc:91]                                                                    | 2.67 | 8.0E-19 |
| SMKR1    | ENSG00000240204 | small lysine-rich protein 1 [Source:HGNC Symbol;Acc:43561]                                                                                  | 3.03 | 8.2E-19 |
| CRLS1    | ENSG00000088766 | cardiolipin synthase 1 [Source:HGNC Symbol;Acc:16148]                                                                                       | 1.16 | 8.5E-19 |
| DPAGT1   | ENSG00000172269 | dolichyl-phosphate (UDP-N-acetylglucosamine) N-acetylglucosaminophosphotransferase 1 (GlcNAc-1-P transferase) [Source:HGNC Symbol;Acc:2995] | 1.34 | 9.1E-19 |
| UBE2G2   | ENSG00000184787 | ubiquitin-conjugating enzyme E2G 2 [Source:HGNC Symbol;Acc:12483]                                                                           | 1.27 | 9.2E-19 |
| LRP8     | ENSG00000157193 | low density lipoprotein receptor-related protein 8, apolipoprotein e receptor [Source:HGNC Symbol;Acc:6700]                                 | 1.45 | 9.9E-19 |
| PDCL3    | ENSG00000115539 | phosducin-like 3 [Source:HGNC Symbol;Acc:28860]                                                                                             | 1.50 | 1.0E-18 |
| LARS     | ENSG00000133706 | leucyl-tRNA synthetase [Source:HGNC Symbol;Acc:6512]                                                                                        | 1.36 | 1.1E-18 |

|          |                 |                                                                                                               |      |         |
|----------|-----------------|---------------------------------------------------------------------------------------------------------------|------|---------|
| FOXRED2  | ENSG00000100350 | FAD-dependent oxidoreductase domain containing 2 [Source:HGNC Symbol;Acc:26264]                               | 3.39 | 1.1E-18 |
| NHP2L1   | ENSG00000100138 | NHP2 non-histone chromosome protein 2-like 1 ( <i>S. cerevisiae</i> ) [Source:HGNC Symbol;Acc:7819]           | 1.54 | 1.1E-18 |
| --       | ENSG00000261061 | --                                                                                                            | 2.58 | 1.1E-18 |
| POLR1E   | ENSG00000137054 | polymerase (RNA) I polypeptide E, 53kDa [Source:HGNC Symbol;Acc:17631]                                        | 1.77 | 1.2E-18 |
| HAUS5    | ENSG00000249115 | HAUS augmin-like complex, subunit 5 [Source:HGNC Symbol;Acc:29130]                                            | 1.96 | 1.4E-18 |
| --       | ENSG00000005189 | Putative RNA exonuclease NEF-sp [Source:UniProtKB/Swiss-Prot;Acc:Q961C2]                                      | 2.32 | 1.4E-18 |
| PGAP1    | ENSG00000197121 | post-GPI attachment to proteins 1 [Source:HGNC Symbol;Acc:25712]                                              | 2.18 | 1.5E-18 |
| EDAR     | ENSG00000135960 | ectodysplasin A receptor [Source:HGNC Symbol;Acc:2895]                                                        | 2.96 | 1.5E-18 |
| HIRIP3   | ENSG00000149929 | HIRA interacting protein 3 [Source:HGNC Symbol;Acc:4917]                                                      | 1.28 | 1.6E-18 |
| MRPL11   | ENSG00000174547 | mitochondrial ribosomal protein L11 [Source:HGNC Symbol;Acc:14042]                                            | 1.76 | 1.9E-18 |
| C9orf152 | ENSG00000188959 | chromosome 9 open reading frame 152 [Source:HGNC Symbol;Acc:31455]                                            | 1.88 | 2.0E-18 |
| TFAM     | ENSG00000108064 | transcription factor A, mitochondrial [Source:HGNC Symbol;Acc:11741]                                          | 1.97 | 2.0E-18 |
| SASS6    | ENSG00000156876 | spindle assembly 6 homolog ( <i>C. elegans</i> ) [Source:HGNC Symbol;Acc:25403]                               | 2.30 | 2.1E-18 |
| AGPAT5   | ENSG00000155189 | 1-acylglycerol-3-phosphate O-acyltransferase 5 [Source:HGNC Symbol;Acc:20886]                                 | 2.25 | 2.1E-18 |
| LRPPRC   | ENSG00000138095 | leucine-rich pentatricopeptide repeat containing [Source:HGNC Symbol;Acc:15714]                               | 1.55 | 2.1E-18 |
| SLC7A2   | ENSG00000003989 | solute carrier family 7 (cationic amino acid transporter, y+ system), member 2 [Source:HGNC Symbol;Acc:11060] | 4.45 | 2.3E-18 |

|          |                 |                                                                                                     |      |         |
|----------|-----------------|-----------------------------------------------------------------------------------------------------|------|---------|
| GNG4     | ENSG00000168243 | guanine nucleotide binding protein (G protein), gamma 4<br>[Source:HGNC Symbol;Acc:4407]            | 2.01 | 2.9E-18 |
| APIP     | ENSG00000149089 | APAF1 interacting protein [Source:HGNC Symbol;Acc:17581]                                            | 1.53 | 2.9E-18 |
| CHAC2    | ENSG00000143942 | ChaC, cation transport regulator homolog 2 (E. coli) [Source:HGNC<br>Symbol;Acc:32363]              | 2.38 | 3.0E-18 |
| TRAIP    | ENSG00000183763 | TRAF interacting protein [Source:HGNC Symbol;Acc:30764]                                             | 3.02 | 3.3E-18 |
| ACAT1    | ENSG00000075239 | acetyl-CoA acetyltransferase 1 [Source:HGNC Symbol;Acc:93]                                          | 1.76 | 3.3E-18 |
| TESC     | ENSG00000088992 | tescalcin [Source:HGNC Symbol;Acc:26065]                                                            | 1.79 | 4.2E-18 |
| C17orf53 | ENSG00000125319 | chromosome 17 open reading frame 53 [Source:HGNC<br>Symbol;Acc:28460]                               | 3.62 | 4.2E-18 |
| RPS27A   | ENSG00000143947 | ribosomal protein S27a [Source:HGNC Symbol;Acc:10417]                                               | 1.10 | 4.3E-18 |
| XPO5     | ENSG00000124571 | exportin 5 [Source:HGNC Symbol;Acc:17675]                                                           | 1.27 | 4.4E-18 |
| ZNF485   | ENSG00000198298 | zinc finger protein 485 [Source:HGNC Symbol;Acc:23440]                                              | 2.65 | 4.7E-18 |
| ZNF589   | ENSG00000164048 | zinc finger protein 589 [Source:HGNC Symbol;Acc:16747]                                              | 1.89 | 4.9E-18 |
| LFNG     | ENSG00000106003 | LFNG O-fucosylpeptide 3-beta-N-acetylglucosaminyltransferase<br>[Source:HGNC Symbol;Acc:6560]       | 1.57 | 4.9E-18 |
| NDUFAF2  | ENSG00000164182 | NADH dehydrogenase (ubiquinone) complex I, assembly factor 2<br>[Source:HGNC Symbol;Acc:28086]      | 1.85 | 5.1E-18 |
| POLA2    | ENSG00000014138 | polymerase (DNA directed), alpha 2, accessory subunit [Source:HGNC<br>Symbol;Acc:30073]             | 1.40 | 5.4E-18 |
| DLEU1    | ENSG00000176124 | deleted in lymphocytic leukemia 1 (non-protein coding)<br>[Source:HGNC Symbol;Acc:13747]            | 2.26 | 5.5E-18 |
| C4orf46  | ENSG00000205208 | chromosome 4 open reading frame 46 [Source:HGNC<br>Symbol;Acc:27320]                                | 3.15 | 5.8E-18 |
| SNHG3    | ENSG00000242125 | small nucleolar RNA host gene 3 (non-protein coding) [Source:HGNC<br>Symbol;Acc:10118]              | 1.55 | 5.9E-18 |
| NUFIP1   | ENSG00000083635 | nuclear fragile X mental retardation protein interacting protein 1<br>[Source:HGNC Symbol;Acc:8057] | 2.13 | 6.0E-18 |
| --       | ENSG00000264577 | --                                                                                                  | 1.19 | 6.2E-18 |

|          |                 |                                                                                                                   |      |         |
|----------|-----------------|-------------------------------------------------------------------------------------------------------------------|------|---------|
| DDX11    | ENSG00000013573 | DEAD/H (Asp-Glu-Ala-Asp/His) box helicase 11 [Source:HGNC Symbol;Acc:2736]                                        | 1.50 | 6.5E-18 |
| --       | ENSG00000245322 | --                                                                                                                | 1.97 | 6.9E-18 |
| PMS1     | ENSG00000064933 | PMS1 postmeiotic segregation increased 1 ( <i>S. cerevisiae</i> ) [Source:HGNC Symbol;Acc:9121]                   | 2.31 | 7.0E-18 |
| THG1L    | ENSG00000113272 | tRNA-histidine guanylyltransferase 1-like ( <i>S. cerevisiae</i> ) [Source:HGNC Symbol;Acc:26053]                 | 1.65 | 7.0E-18 |
| RFX5     | ENSG00000143390 | regulatory factor X, 5 (influences HLA class II expression) [Source:HGNC Symbol;Acc:9986]                         | 1.61 | 7.2E-18 |
| STOX1    | ENSG00000165730 | storkhead box 1 [Source:HGNC Symbol;Acc:23508]                                                                    | 3.90 | 7.8E-18 |
| GEMIN2   | ENSG00000092208 | gem (nuclear organelle) associated protein 2 [Source:HGNC Symbol;Acc:10884]                                       | 1.97 | 7.9E-18 |
| RRP15    | ENSG00000067533 | ribosomal RNA processing 15 homolog ( <i>S. cerevisiae</i> ) [Source:HGNC Symbol;Acc:24255]                       | 2.15 | 8.1E-18 |
| SLC25A19 | ENSG00000125454 | solute carrier family 25 (mitochondrial thiamine pyrophosphate carrier), member 19 [Source:HGNC Symbol;Acc:14409] | 1.69 | 8.1E-18 |
| THADA    | ENSG00000115970 | thyroid adenoma associated [Source:HGNC Symbol;Acc:19217]                                                         | 1.41 | 8.1E-18 |
| RBM28    | ENSG00000106344 | RNA binding motif protein 28 [Source:HGNC Symbol;Acc:21863]                                                       | 1.34 | 1.0E-17 |
| RBBP9    | ENSG00000089050 | retinoblastoma binding protein 9 [Source:HGNC Symbol;Acc:9892]                                                    | 2.30 | 1.0E-17 |
| MTIF2    | ENSG00000085760 | mitochondrial translational initiation factor 2 [Source:HGNC Symbol;Acc:7441]                                     | 1.11 | 1.1E-17 |
| PRMT1    | ENSG00000126457 | protein arginine methyltransferase 1 [Source:HGNC Symbol;Acc:5187]                                                | 1.74 | 1.1E-17 |
| NUP107   | ENSG00000111581 | nucleoporin 107kDa [Source:HGNC Symbol;Acc:29914]                                                                 | 1.49 | 1.2E-17 |
| C10orf2  | ENSG00000107815 | chromosome 10 open reading frame 2 [Source:HGNC Symbol;Acc:1160]                                                  | 1.92 | 1.3E-17 |
| FAM161A  | ENSG00000170264 | family with sequence similarity 161, member A [Source:HGNC Symbol;Acc:25808]                                      | 4.09 | 1.4E-17 |
| RPL7     | ENSG00000147604 | ribosomal protein L7 [Source:HGNC Symbol;Acc:10363]                                                               | 1.28 | 1.4E-17 |

|           |                 |                                                                                                            |      |         |
|-----------|-----------------|------------------------------------------------------------------------------------------------------------|------|---------|
| HMGN3     | ENSG00000118418 | high mobility group nucleosomal binding domain 3 [Source:HGNC Symbol;Acc:12312]                            | 3.86 | 1.4E-17 |
| BLMH      | ENSG00000108578 | bleomycin hydrolase [Source:HGNC Symbol;Acc:1059]                                                          | 1.89 | 1.4E-17 |
| RPL3      | ENSG00000100316 | ribosomal protein L3 [Source:HGNC Symbol;Acc:10332]                                                        | 1.38 | 1.4E-17 |
| CC2D2A    | ENSG00000048342 | coiled-coil and C2 domain containing 2A [Source:HGNC Symbol;Acc:29253]                                     | 3.05 | 1.5E-17 |
| RRN3      | ENSG00000085721 | RRN3 RNA polymerase I transcription factor homolog ( <i>S. cerevisiae</i> ) [Source:HGNC Symbol;Acc:30346] | 1.33 | 1.5E-17 |
| NUP155    | ENSG00000113569 | nucleoporin 155kDa [Source:HGNC Symbol;Acc:8063]                                                           | 1.83 | 1.5E-17 |
| TDP1      | ENSG00000042088 | tyrosyl-DNA phosphodiesterase 1 [Source:HGNC Symbol;Acc:18884]                                             | 1.53 | 1.5E-17 |
| RAD54B    | ENSG00000197275 | RAD54 homolog B ( <i>S. cerevisiae</i> ) [Source:HGNC Symbol;Acc:17228]                                    | 3.06 | 1.5E-17 |
| ANP32A    | ENSG00000140350 | acidic (leucine-rich) nuclear phosphoprotein 32 family, member A [Source:HGNC Symbol;Acc:13233]            | 1.20 | 1.6E-17 |
| SNHG10    | ENSG00000247092 | small nucleolar RNA host gene 10 (non-protein coding) [Source:HGNC Symbol;Acc:27510]                       | 2.04 | 1.6E-17 |
| SESN3     | ENSG00000149212 | sestrin 3 [Source:HGNC Symbol;Acc:23060]                                                                   | 2.37 | 1.6E-17 |
| C4orf21   | ENSG00000138658 | chromosome 4 open reading frame 21 [Source:HGNC Symbol;Acc:25654]                                          | 3.22 | 1.6E-17 |
| ATG4C     | ENSG00000125703 | autophagy related 4C, cysteine peptidase [Source:HGNC Symbol;Acc:16040]                                    | 2.28 | 1.7E-17 |
| SMYD5     | ENSG00000135632 | SMYD family member 5 [Source:HGNC Symbol;Acc:16258]                                                        | 1.89 | 1.8E-17 |
| REPIN1    | ENSG00000214022 | replication initiator 1 [Source:HGNC Symbol;Acc:17922]                                                     | 1.44 | 2.1E-17 |
| GLS2      | ENSG00000135423 | glutaminase 2 (liver, mitochondrial) [Source:HGNC Symbol;Acc:29570]                                        | 2.67 | 2.1E-17 |
| TUBB      | ENSG00000196230 | tubulin, beta class I [Source:HGNC Symbol;Acc:20778]                                                       | 1.33 | 2.2E-17 |
| CHPT1     | ENSG00000111666 | choline phosphotransferase 1 [Source:HGNC Symbol;Acc:17852]                                                | 1.09 | 2.3E-17 |
| LRRC37A4P | ENSG00000214425 | leucine rich repeat containing 37, member A4, pseudogene [Source:HGNC Symbol;Acc:25479]                    | 2.56 | 2.3E-17 |
| --        | ENSG00000270055 | --                                                                                                         | 2.28 | 2.5E-17 |

|         |                 |                                                                                                                    |      |         |
|---------|-----------------|--------------------------------------------------------------------------------------------------------------------|------|---------|
| ACTL6A  | ENSG00000136518 | actin-like 6A [Source:HGNC Symbol;Acc:24124]                                                                       | 1.39 | 2.5E-17 |
| AUNIP   | ENSG00000127423 | aurora kinase A and ninein interacting protein [Source:HGNC Symbol;Acc:28363]                                      | 2.50 | 2.7E-17 |
| FBF1    | ENSG00000188878 | Fas (TNFRSF6) binding factor 1 [Source:HGNC Symbol;Acc:24674]                                                      | 2.72 | 2.8E-17 |
| RPL6    | ENSG00000089009 | ribosomal protein L6 [Source:HGNC Symbol;Acc:10362]                                                                | 1.25 | 2.8E-17 |
| RRN3P1  | ENSG00000248124 | RNA polymerase I transcription factor homolog ( <i>S. cerevisiae</i> ) pseudogene 1 [Source:HGNC Symbol;Acc:30548] | 1.56 | 2.8E-17 |
| URB2    | ENSG00000135763 | URB2 ribosome biogenesis 2 homolog ( <i>S. cerevisiae</i> ) [Source:HGNC Symbol;Acc:28967]                         | 1.96 | 3.0E-17 |
| RPA2    | ENSG00000117748 | replication protein A2, 32kDa [Source:HGNC Symbol;Acc:10290]                                                       | 1.38 | 3.0E-17 |
| --      | ENSG00000170089 | --                                                                                                                 | 1.96 | 3.3E-17 |
| FANCM   | ENSG00000187790 | Fanconi anemia, complementation group M [Source:HGNC Symbol;Acc:23168]                                             | 2.27 | 3.5E-17 |
| SOAT1   | ENSG00000057252 | sterol O-acyltransferase 1 [Source:HGNC Symbol;Acc:11177]                                                          | 1.96 | 3.6E-17 |
| RPL23   | ENSG00000125691 | ribosomal protein L23 [Source:HGNC Symbol;Acc:10316]                                                               | 1.37 | 3.6E-17 |
| --      | ENSG00000231365 | --                                                                                                                 | 1.82 | 3.9E-17 |
| POLD1   | ENSG00000062822 | polymerase (DNA directed), delta 1, catalytic subunit [Source:HGNC Symbol;Acc:9175]                                | 2.43 | 3.9E-17 |
| DDX31   | ENSG00000125485 | DEAD (Asp-Glu-Ala-Asp) box polypeptide 31 [Source:HGNC Symbol;Acc:16715]                                           | 1.64 | 3.9E-17 |
| MRPL24  | ENSG00000143314 | mitochondrial ribosomal protein L24 [Source:HGNC Symbol;Acc:14037]                                                 | 1.40 | 3.9E-17 |
| EIF2B3  | ENSG00000070785 | eukaryotic translation initiation factor 2B, subunit 3 gamma, 58kDa [Source:HGNC Symbol;Acc:3259]                  | 1.66 | 4.3E-17 |
| LYRM7   | ENSG00000186687 | LYR motif containing 7 [Source:HGNC Symbol;Acc:28072]                                                              | 1.93 | 4.3E-17 |
| CECR5   | ENSG00000069998 | cat eye syndrome chromosome region, candidate 5 [Source:HGNC Symbol;Acc:1843]                                      | 1.80 | 4.5E-17 |
| TWISTNB | ENSG00000105849 | TWIST neighbor [Source:HGNC Symbol;Acc:18027]                                                                      | 1.61 | 4.5E-17 |

|         |                 |                                                                                                                                                          |      |         |
|---------|-----------------|----------------------------------------------------------------------------------------------------------------------------------------------------------|------|---------|
| TAF4B   | ENSG00000141384 | TAF4b RNA polymerase II, TATA box binding protein (TBP)-associated factor, 105kDa [Source:HGNC Symbol;Acc:11538]                                         | 2.87 | 4.5E-17 |
| ZBTB9   | ENSG00000213588 | zinc finger and BTB domain containing 9 [Source:HGNC Symbol;Acc:28323]                                                                                   | 1.84 | 4.6E-17 |
| RCC2    | ENSG00000179051 | regulator of chromosome condensation 2 [Source:HGNC Symbol;Acc:30297]                                                                                    | 1.18 | 4.7E-17 |
| TBC1D24 | ENSG00000162065 | TBC1 domain family, member 24 [Source:HGNC Symbol;Acc:29203]                                                                                             | 1.39 | 4.7E-17 |
| SLC19A1 | ENSG00000173638 | solute carrier family 19 (folate transporter), member 1 [Source:HGNC Symbol;Acc:10937]                                                                   | 2.69 | 5.6E-17 |
| HSPA4L  | ENSG00000164070 | heat shock 70kDa protein 4-like [Source:HGNC Symbol;Acc:17041]                                                                                           | 1.79 | 5.7E-17 |
| --      | ENSG00000268565 | --                                                                                                                                                       | 2.37 | 5.9E-17 |
| --      | ENSG00000260807 | --                                                                                                                                                       | 3.27 | 6.2E-17 |
| --      | ENSG00000245970 | --                                                                                                                                                       | 1.09 | 6.6E-17 |
| DTD2    | ENSG00000129480 | D-tyrosyl-tRNA deacylase 2 (putative) [Source:HGNC Symbol;Acc:20277]                                                                                     | 2.30 | 6.6E-17 |
| CLSPN   | ENSG00000092853 | claspin [Source:HGNC Symbol;Acc:19715]                                                                                                                   | 3.76 | 6.8E-17 |
| KBTBD6  | ENSG00000165572 | kelch repeat and BTB (POZ) domain containing 6 [Source:HGNC Symbol;Acc:25340]                                                                            | 3.26 | 7.0E-17 |
| AMT     | ENSG00000145020 | aminomethyltransferase [Source:HGNC Symbol;Acc:473]                                                                                                      | 1.72 | 7.4E-17 |
| --      | ENSG00000197775 | --                                                                                                                                                       | 2.12 | 7.6E-17 |
| EIF3L   | ENSG00000100129 | eukaryotic translation initiation factor 3, subunit L [Source:HGNC Symbol;Acc:18138]                                                                     | 1.03 | 7.7E-17 |
| WDR75   | ENSG00000115368 | WD repeat domain 75 [Source:HGNC Symbol;Acc:25725]                                                                                                       | 1.43 | 7.7E-17 |
| CEP128  | ENSG00000100629 | centrosomal protein 128kDa [Source:HGNC Symbol;Acc:20359]                                                                                                | 3.67 | 7.9E-17 |
| GART    | ENSG00000159131 | phosphoribosylglycinamide formyltransferase, phosphoribosylglycinamide synthetase, phosphoribosylaminoimidazole synthetase [Source:HGNC Symbol;Acc:4163] | 1.34 | 8.6E-17 |
| CDK4    | ENSG00000135446 | cyclin-dependent kinase 4 [Source:HGNC Symbol;Acc:1773]                                                                                                  | 1.16 | 9.1E-17 |

|          |                 |                                                                                           |      |         |
|----------|-----------------|-------------------------------------------------------------------------------------------|------|---------|
| ADAMTS15 | ENSG00000166106 | ADAM metallopeptidase with thrombospondin type 1 motif, 15 [Source:HGNC Symbol;Acc:16305] | 4.04 | 9.3E-17 |
| PCID2    | ENSG00000126226 | PCI domain containing 2 [Source:HGNC Symbol;Acc:25653]                                    | 1.07 | 9.4E-17 |
| DNAJC9   | ENSG00000213551 | DnaJ (Hsp40) homolog, subfamily C, member 9 [Source:HGNC Symbol;Acc:19123]                | 1.34 | 9.5E-17 |
| GPN3     | ENSG00000111231 | GPN-loop GTPase 3 [Source:HGNC Symbol;Acc:30186]                                          | 1.80 | 9.8E-17 |
| WDR3     | ENSG00000065183 | WD repeat domain 3 [Source:HGNC Symbol;Acc:12755]                                         | 1.44 | 1.0E-16 |
| TCEAL4   | ENSG00000133142 | transcription elongation factor A (SII)-like 4 [Source:HGNC Symbol;Acc:26121]             | 1.69 | 1.1E-16 |
| SNRNP40  | ENSG00000060688 | small nuclear ribonucleoprotein 40kDa (U5) [Source:HGNC Symbol;Acc:30857]                 | 1.45 | 1.1E-16 |
| CCT2     | ENSG00000166226 | chaperonin containing TCP1, subunit 2 (beta) [Source:HGNC Symbol;Acc:1615]                | 1.26 | 1.2E-16 |
| NFIA     | ENSG00000162599 | nuclear factor I/A [Source:HGNC Symbol;Acc:7784]                                          | 1.69 | 1.2E-16 |
| IPO9     | ENSG00000198700 | importin 9 [Source:HGNC Symbol;Acc:19425]                                                 | 1.06 | 1.2E-16 |
| CNTRL    | ENSG00000119397 | centriolin [Source:HGNC Symbol;Acc:1858]                                                  | 1.77 | 1.4E-16 |
| MRPS25   | ENSG00000131368 | mitochondrial ribosomal protein S25 [Source:HGNC Symbol;Acc:14511]                        | 1.07 | 1.4E-16 |
| RWDD2B   | ENSG00000156253 | RWD domain containing 2B [Source:HGNC Symbol;Acc:1302]                                    | 1.66 | 1.5E-16 |
| CNDP1    | ENSG00000150656 | carosine dipeptidase 1 (metallopeptidase M20 family) [Source:HGNC Symbol;Acc:20675]       | 4.40 | 1.5E-16 |
| EXOSC5   | ENSG00000077348 | exosome component 5 [Source:HGNC Symbol;Acc:24662]                                        | 2.39 | 1.6E-16 |
| DNMT3A   | ENSG00000119772 | DNA (cytosine-5-)-methyltransferase 3 alpha [Source:HGNC Symbol;Acc:2978]                 | 1.65 | 1.6E-16 |
| SYNE2    | ENSG00000054654 | spectrin repeat containing, nuclear envelope 2 [Source:HGNC Symbol;Acc:17084]             | 1.62 | 1.7E-16 |
| GOT2     | ENSG00000125166 | glutamic-oxaloacetic transaminase 2, mitochondrial [Source:HGNC Symbol;Acc:4433]          | 1.24 | 1.7E-16 |



|          |                 |                                                                                                                                  |      |         |
|----------|-----------------|----------------------------------------------------------------------------------------------------------------------------------|------|---------|
| TSFM     | ENSG00000123297 | Ts translation elongation factor, mitochondrial [Source:HGNC Symbol;Acc:12367]                                                   | 1.39 | 1.7E-16 |
| RILPL2   | ENSG00000150977 | Rab interacting lysosomal protein-like 2 [Source:HGNC Symbol;Acc:28787]                                                          | 2.66 | 1.8E-16 |
| RPS6     | ENSG00000137154 | ribosomal protein S6 [Source:HGNC Symbol;Acc:10429]                                                                              | 1.40 | 1.9E-16 |
| NUP133   | ENSG00000069248 | nucleoporin 133kDa [Source:HGNC Symbol;Acc:18016]                                                                                | 1.32 | 2.0E-16 |
| DOCK11   | ENSG00000147251 | dedicator of cytokinesis 11 [Source:HGNC Symbol;Acc:23483]                                                                       | 2.75 | 2.6E-16 |
| SMARCC1  | ENSG00000173473 | SWI/SNF related, matrix associated, actin dependent regulator of chromatin, subfamily c, member 1 [Source:HGNC Symbol;Acc:11104] | 1.36 | 2.6E-16 |
| C1orf198 | ENSG00000119280 | chromosome 1 open reading frame 198 [Source:HGNC Symbol;Acc:25900]                                                               | 1.06 | 2.9E-16 |
| MDM1     | ENSG00000111554 | Mdm1 nuclear protein homolog (mouse) [Source:HGNC Symbol;Acc:29917]                                                              | 2.79 | 3.0E-16 |
| TMPO     | ENSG00000120802 | thymopoietin [Source:HGNC Symbol;Acc:11875]                                                                                      | 1.75 | 3.0E-16 |
| PGAM5    | ENSG00000247077 | phosphoglycerate mutase family member 5 [Source:HGNC Symbol;Acc:28763]                                                           | 1.42 | 3.1E-16 |
| RPS3     | ENSG00000149273 | ribosomal protein S3 [Source:HGNC Symbol;Acc:10420]                                                                              | 1.25 | 3.1E-16 |
| MRPL37   | ENSG00000116221 | mitochondrial ribosomal protein L37 [Source:HGNC Symbol;Acc:14034]                                                               | 1.13 | 3.2E-16 |
| COQ3     | ENSG00000132423 | coenzyme Q3 methyltransferase [Source:HGNC Symbol;Acc:18175]                                                                     | 2.52 | 3.4E-16 |
| CUTA     | ENSG00000112514 | cutA divalent cation tolerance homolog (E. coli) [Source:HGNC Symbol;Acc:21101]                                                  | 1.78 | 3.5E-16 |
| SMIM11   | ENSG00000205670 | small integral membrane protein 11 [Source:HGNC Symbol;Acc:1293]                                                                 | 2.50 | 3.6E-16 |
| DHX57    | ENSG00000163214 | DEAH (Asp-Glu-Ala-Asp/His) box polypeptide 57 [Source:HGNC Symbol;Acc:20086]                                                     | 1.75 | 3.8E-16 |
| TIMM9    | ENSG00000100575 | translocase of inner mitochondrial membrane 9 homolog (yeast) [Source:HGNC Symbol;Acc:11819]                                     | 1.77 | 3.8E-16 |
| RABEPK   | ENSG00000136933 | Rab9 effector protein with kelch motifs [Source:HGNC Symbol;Acc:16896]                                                           | 1.56 | 3.9E-16 |

|         |                 |                                                                                            |      |         |
|---------|-----------------|--------------------------------------------------------------------------------------------|------|---------|
| TTF2    | ENSG00000116830 | transcription termination factor, RNA polymerase II [Source:HGNC Symbol;Acc:12398]         | 1.39 | 4.0E-16 |
| ATAD5   | ENSG00000176208 | ATPase family, AAA domain containing 5 [Source:HGNC Symbol;Acc:25752]                      | 2.44 | 4.7E-16 |
| HSPA9   | ENSG00000113013 | heat shock 70kDa protein 9 (mortalin) [Source:HGNC Symbol;Acc:5244]                        | 1.16 | 4.7E-16 |
| NUDCD2  | ENSG00000170584 | NudC domain containing 2 [Source:HGNC Symbol;Acc:30535]                                    | 1.80 | 4.7E-16 |
| SNRPC   | ENSG00000124562 | small nuclear ribonucleoprotein polypeptide C [Source:HGNC Symbol;Acc:11157]               | 1.22 | 4.8E-16 |
| INTS10  | ENSG00000104613 | integrator complex subunit 10 [Source:HGNC Symbol;Acc:25548]                               | 1.39 | 4.8E-16 |
| GEMIN4  | ENSG00000179409 | gem (nuclear organelle) associated protein 4 [Source:HGNC Symbol;Acc:15717]                | 1.78 | 5.4E-16 |
| ALG1    | ENSG00000033011 | ALG1, chitobiosyldiphosphodolichol beta-mannosyltransferase [Source:HGNC Symbol;Acc:18294] | 1.35 | 5.6E-16 |
| RFT1    | ENSG00000163933 | RFT1 homolog ( <i>S. cerevisiae</i> ) [Source:HGNC Symbol;Acc:30220]                       | 1.44 | 5.8E-16 |
| CSE1L   | ENSG00000124207 | CSE1 chromosome segregation 1-like (yeast) [Source:HGNC Symbol;Acc:2431]                   | 1.50 | 5.9E-16 |
| ZMYM3   | ENSG00000147130 | zinc finger, MYM-type 3 [Source:HGNC Symbol;Acc:13054]                                     | 1.26 | 6.2E-16 |
| FANCB   | ENSG00000181544 | Fanconi anemia, complementation group B [Source:HGNC Symbol;Acc:3583]                      | 4.59 | 6.2E-16 |
| DBF4B   | ENSG00000161692 | DBF4 homolog B ( <i>S. cerevisiae</i> ) [Source:HGNC Symbol;Acc:17883]                     | 2.28 | 6.7E-16 |
| TBC1D31 | ENSG00000156787 | TBC1 domain family, member 31 [Source:HGNC Symbol;Acc:30888]                               | 1.42 | 6.9E-16 |
| RPL30   | ENSG00000156482 | ribosomal protein L30 [Source:HGNC Symbol;Acc:10333]                                       | 1.13 | 6.9E-16 |
| HSPB6   | ENSG00000004776 | heat shock protein, alpha-crystallin-related, B6 [Source:HGNC Symbol;Acc:26511]            | 2.81 | 7.4E-16 |
| FAM210B | ENSG00000124098 | family with sequence similarity 210, member B [Source:HGNC Symbol;Acc:16102]               | 1.41 | 7.4E-16 |
| C4orf27 | ENSG00000056050 | chromosome 4 open reading frame 27 [Source:HGNC Symbol;Acc:26051]                          | 2.60 | 7.7E-16 |

|           |                 |                                                                                         |      |         |
|-----------|-----------------|-----------------------------------------------------------------------------------------|------|---------|
| QTRTD1    | ENSG00000151576 | queuine tRNA-ribosyltransferase domain containing 1 [Source:HGNC Symbol;Acc:25771]      | 1.53 | 8.1E-16 |
| SLC25A35  | ENSG00000125434 | solute carrier family 25, member 35 [Source:HGNC Symbol;Acc:31921]                      | 1.52 | 8.1E-16 |
| TK1       | ENSG00000167900 | thymidine kinase 1, soluble [Source:HGNC Symbol;Acc:11830]                              | 1.59 | 8.6E-16 |
| TARBP1    | ENSG00000059588 | TAR (HIV-1) RNA binding protein 1 [Source:HGNC Symbol;Acc:11568]                        | 1.25 | 8.7E-16 |
| DDX51     | ENSG00000185163 | DEAD (Asp-Glu-Ala-Asp) box polypeptide 51 [Source:HGNC Symbol;Acc:20082]                | 1.59 | 1.0E-15 |
| PTCD2     | ENSG00000049883 | pentatricopeptide repeat domain 2 [Source:HGNC Symbol;Acc:25734]                        | 2.35 | 1.0E-15 |
| HNRNPA0   | ENSG00000177733 | heterogeneous nuclear ribonucleoprotein A0 [Source:HGNC Symbol;Acc:5030]                | 0.96 | 1.0E-15 |
| SLC39A10  | ENSG00000196950 | solute carrier family 39 (zinc transporter), member 10 [Source:HGNC Symbol;Acc:20861]   | 1.88 | 1.0E-15 |
| METTL16   | ENSG00000127804 | methyltransferase like 16 [Source:HGNC Symbol;Acc:28484]                                | 1.35 | 1.0E-15 |
| TMEM14A   | ENSG00000096092 | transmembrane protein 14A [Source:HGNC Symbol;Acc:21076]                                | 1.66 | 1.1E-15 |
| RRM1-AS1  | ENSG00000255276 | RRM1 antisense RNA 1 [Source:HGNC Symbol;Acc:40512]                                     | 1.95 | 1.1E-15 |
| TDGF1     | ENSG00000241186 | teratocarcinoma-derived growth factor 1 [Source:HGNC Symbol;Acc:11701]                  | 4.57 | 1.2E-15 |
| CKAP5     | ENSG00000175216 | cytoskeleton associated protein 5 [Source:HGNC Symbol;Acc:28959]                        | 1.21 | 1.3E-15 |
| COX10-AS1 | ENSG00000236088 | COX10 antisense RNA 1 [Source:HGNC Symbol;Acc:38873]                                    | 2.37 | 1.3E-15 |
| E2F7      | ENSG00000165891 | E2F transcription factor 7 [Source:HGNC Symbol;Acc:23820]                               | 2.51 | 1.3E-15 |
| CCDC58    | ENSG00000160124 | coiled-coil domain containing 58 [Source:HGNC Symbol;Acc:31136]                         | 1.66 | 1.4E-15 |
| PIGU      | ENSG00000101464 | phosphatidylinositol glycan anchor biosynthesis, class U [Source:HGNC Symbol;Acc:15791] | 1.19 | 1.4E-15 |
| NUP160    | ENSG00000030066 | nucleoporin 160kDa [Source:HGNC Symbol;Acc:18017]                                       | 1.46 | 1.5E-15 |
| SF3B3     | ENSG00000189091 | splicing factor 3b, subunit 3, 130kDa [Source:HGNC Symbol;Acc:10770]                    | 1.02 | 1.5E-15 |
| ZNF74     | ENSG00000185252 | zinc finger protein 74 [Source:HGNC Symbol;Acc:13144]                                   | 2.14 | 1.6E-15 |

|            |                 |                                                                                                    |      |         |
|------------|-----------------|----------------------------------------------------------------------------------------------------|------|---------|
| TMEM64     | ENSG00000180694 | transmembrane protein 64 [Source:HGNC Symbol;Acc:25441]                                            | 1.93 | 1.7E-15 |
| EBNA1BP2   | ENSG00000117395 | EBNA1 binding protein 2 [Source:HGNC Symbol;Acc:15531]                                             | 1.04 | 1.8E-15 |
| THNSL1     | ENSG00000185875 | threonine synthase-like 1 ( <i>S. cerevisiae</i> ) [Source:HGNC Symbol;Acc:26160]                  | 2.48 | 1.8E-15 |
| POLG2      | ENSG00000256525 | polymerase (DNA directed), gamma 2, accessory subunit [Source:HGNC Symbol;Acc:9180]                | 1.75 | 1.9E-15 |
| WDR5       | ENSG00000196363 | WD repeat domain 5 [Source:HGNC Symbol;Acc:12757]                                                  | 1.22 | 2.0E-15 |
| HCAR1      | ENSG00000196917 | hydroxycarboxylic acid receptor 1 [Source:HGNC Symbol;Acc:4532]                                    | 1.89 | 2.0E-15 |
| DNAJC9-AS1 | ENSG00000236756 | DNAJC9 antisense RNA 1 [Source:HGNC Symbol;Acc:31432]                                              | 1.40 | 2.3E-15 |
| SDCCAG3    | ENSG00000165689 | serologically defined colon cancer antigen 3 [Source:HGNC Symbol;Acc:10667]                        | 1.35 | 2.3E-15 |
| TIPIN      | ENSG00000075131 | TIMELESS interacting protein [Source:HGNC Symbol;Acc:30750]                                        | 2.76 | 2.5E-15 |
| THEM6      | ENSG00000130193 | thioesterase superfamily member 6 [Source:HGNC Symbol;Acc:29656]                                   | 1.69 | 2.6E-15 |
| SIGMAR1    | ENSG00000147955 | sigma non-opioid intracellular receptor 1 [Source:HGNC Symbol;Acc:8157]                            | 1.30 | 2.7E-15 |
| BORA       | ENSG00000136122 | bora, aurora kinase A activator [Source:HGNC Symbol;Acc:24724]                                     | 1.52 | 2.8E-15 |
| HIBCH      | ENSG00000198130 | 3-hydroxyisobutyryl-CoA hydrolase [Source:HGNC Symbol;Acc:4908]                                    | 1.50 | 2.8E-15 |
| DHRS4      | ENSG00000157326 | dehydrogenase/reductase (SDR family) member 4 [Source:HGNC Symbol;Acc:16985]                       | 1.57 | 2.9E-15 |
| ZC3H8      | ENSG00000144161 | zinc finger CCCH-type containing 8 [Source:HGNC Symbol;Acc:30941]                                  | 1.86 | 3.0E-15 |
| LCTL       | ENSG00000188501 | lactase-like [Source:HGNC Symbol;Acc:15583]                                                        | 2.66 | 3.1E-15 |
| LAS1L      | ENSG00000001497 | LAS1-like ( <i>S. cerevisiae</i> ) [Source:HGNC Symbol;Acc:25726]                                  | 1.38 | 3.2E-15 |
| --         | ENSG00000233184 | --                                                                                                 | 1.97 | 3.2E-15 |
| UTP20      | ENSG00000120800 | UTP20, small subunit (SSU) processome component, homolog (yeast) [Source:HGNC Symbol;Acc:17897]    | 2.16 | 3.2E-15 |
| SLC4A7     | ENSG00000033867 | solute carrier family 4, sodium bicarbonate cotransporter, member 7 [Source:HGNC Symbol;Acc:11033] | 2.34 | 3.4E-15 |

|          |                 |                                                                                                          |      |         |
|----------|-----------------|----------------------------------------------------------------------------------------------------------|------|---------|
| POLR3E   | ENSG00000058600 | polymerase (RNA) III (DNA directed) polypeptide E (80kD)<br>[Source:HGNC Symbol;Acc:30347]               | 0.99 | 3.4E-15 |
| METTL3   | ENSG00000165819 | methyltransferase like 3 [Source:HGNC Symbol;Acc:17563]                                                  | 1.09 | 3.4E-15 |
| FAM86A   | ENSG00000118894 | family with sequence similarity 86, member A [Source:HGNC<br>Symbol;Acc:32221]                           | 1.32 | 3.7E-15 |
| UBE3D    | ENSG00000118420 | ubiquitin protein ligase E3D [Source:HGNC Symbol;Acc:21381]                                              | 2.91 | 3.8E-15 |
| PRPF40B  | ENSG00000110844 | PRP40 pre-mRNA processing factor 40 homolog B ( <i>S. cerevisiae</i> )<br>[Source:HGNC Symbol;Acc:25031] | 1.84 | 4.0E-15 |
| DIS3L    | ENSG00000166938 | DIS3 mitotic control homolog ( <i>S. cerevisiae</i> )-like [Source:HGNC<br>Symbol;Acc:28698]             | 1.76 | 4.1E-15 |
| C12orf73 | ENSG00000204954 | chromosome 12 open reading frame 73 [Source:HGNC<br>Symbol;Acc:34450]                                    | 1.76 | 4.3E-15 |
| ANKRD16  | ENSG00000134461 | ankyrin repeat domain 16 [Source:HGNC Symbol;Acc:23471]                                                  | 1.95 | 4.5E-15 |
| ATR      | ENSG00000175054 | ataxia telangiectasia and Rad3 related [Source:HGNC Symbol;Acc:882]                                      | 1.50 | 5.0E-15 |
| WDR36    | ENSG00000134987 | WD repeat domain 36 [Source:HGNC Symbol;Acc:30696]                                                       | 1.76 | 5.1E-15 |
| TACC1    | ENSG00000147526 | transforming, acidic coiled-coil containing protein 1 [Source:HGNC<br>Symbol;Acc:11522]                  | 0.98 | 5.1E-15 |
| MRPL1    | ENSG00000169288 | mitochondrial ribosomal protein L1 [Source:HGNC Symbol;Acc:14275]                                        | 1.57 | 5.3E-15 |
| RGMB-AS1 | ENSG00000246763 | RGMB antisense RNA 1 [Source:HGNC Symbol;Acc:48666]                                                      | 3.07 | 5.5E-15 |
| PAAF1    | ENSG00000175575 | proteasomal ATPase-associated factor 1 [Source:HGNC<br>Symbol;Acc:25687]                                 | 1.64 | 5.8E-15 |
| NUDT21   | ENSG00000167005 | nudix (nucleoside diphosphate linked moiety X)-type motif 21<br>[Source:HGNC Symbol;Acc:13870]           | 1.22 | 5.8E-15 |
| C20orf96 | ENSG00000196476 | chromosome 20 open reading frame 96 [Source:HGNC<br>Symbol;Acc:16227]                                    | 2.17 | 5.9E-15 |
| TMEM205  | ENSG00000105518 | transmembrane protein 205 [Source:HGNC Symbol;Acc:29631]                                                 | 1.61 | 6.1E-15 |
| DCPS     | ENSG00000110063 | decapping enzyme, scavenger [Source:HGNC Symbol;Acc:29812]                                               | 1.45 | 6.1E-15 |

|         |                 |                                                                    |      |         |
|---------|-----------------|--------------------------------------------------------------------|------|---------|
| --      | ENSG00000260196 | --                                                                 | 1.78 | 6.4E-15 |
| GSG2    | ENSG00000177602 | germ cell associated 2 (haspin) [Source:HGNC Symbol;Acc:19682]     | 3.48 | 6.7E-15 |
| WDR74   | ENSG00000133316 | WD repeat domain 74 [Source:HGNC Symbol;Acc:25529]                 | 1.68 | 6.7E-15 |
| RPS25   | ENSG00000118181 | ribosomal protein S25 [Source:HGNC Symbol;Acc:10413]               | 1.12 | 6.7E-15 |
| ETV4    | ENSG00000175832 | ets variant 4 [Source:HGNC Symbol;Acc:3493]                        | 2.00 | 7.2E-15 |
| CCDC74A | ENSG00000163040 | coiled-coil domain containing 74A [Source:HGNC Symbol;Acc:25197]   | 3.25 | 7.5E-15 |
| PA2G4   | ENSG00000170515 | proliferation-associated 2G4, 38kDa [Source:HGNC Symbol;Acc:8550]  | 1.33 | 7.7E-15 |
|         |                 | dynein, axonemal, assembly factor 2 [Source:HGNC                   |      |         |
| DNAAF2  | ENSG00000165506 | Symbol;Acc:20188]                                                  | 1.63 | 8.2E-15 |
| STOML2  | ENSG00000165283 | stomatin (EPB72)-like 2 [Source:HGNC Symbol;Acc:14559]             | 1.31 | 8.5E-15 |
| WDR61   | ENSG00000140395 | WD repeat domain 61 [Source:HGNC Symbol;Acc:30300]                 | 1.21 | 8.9E-15 |
| --      | ENSG00000273373 | --                                                                 | 1.82 | 9.6E-15 |
| UROS    | ENSG00000188690 | uroporphyrinogen III synthase [Source:HGNC Symbol;Acc:12592]       | 1.49 | 9.6E-15 |
|         |                 | B-cell CLL/lymphoma 11A (zinc finger protein) [Source:HGNC         |      |         |
| BCL11A  | ENSG00000119866 | Symbol;Acc:13221]                                                  | 2.30 | 1.1E-14 |
| DPH2    | ENSG00000132768 | DPH2 homolog (S. cerevisiae) [Source:HGNC Symbol;Acc:3004]         | 1.64 | 1.2E-14 |
| --      | ENSG00000233728 | --                                                                 | 1.63 | 1.2E-14 |
| RPL21   | ENSG00000122026 | ribosomal protein L21 [Source:HGNC Symbol;Acc:10313]               | 1.30 | 1.2E-14 |
|         |                 | non-SMC element 4 homolog A (S. cerevisiae) [Source:HGNC           |      |         |
| NSMCE4A | ENSG00000107672 | Symbol;Acc:25935]                                                  | 1.30 | 1.2E-14 |
| DMKN    | ENSG00000161249 | dermokine [Source:HGNC Symbol;Acc:25063]                           | 1.44 | 1.3E-14 |
|         |                 | non-SMC element 1 homolog (S. cerevisiae) [Source:HGNC             |      |         |
| NSMCE1  | ENSG00000169189 | Symbol;Acc:29897]                                                  | 1.13 | 1.3E-14 |
|         |                 | methionyl aminopeptidase type 1D (mitochondrial) [Source:HGNC      |      |         |
| METAP1D | ENSG00000172878 | Symbol;Acc:32583]                                                  | 3.41 | 1.4E-14 |
|         |                 | family with sequence similarity 120C [Source:HGNC                  |      |         |
| FAM120C | ENSG00000184083 | Symbol;Acc:16949]                                                  | 3.01 | 1.5E-14 |
| EXTL2   | ENSG00000162694 | exostosin-like glycosyltransferase 2 [Source:HGNC Symbol;Acc:3516] | 2.28 | 1.5E-14 |
| PDCD11  | ENSG00000148843 | programmed cell death 11 [Source:HGNC Symbol;Acc:13408]            | 1.44 | 1.5E-14 |

|          |                 |                                                                                                                           |      |         |
|----------|-----------------|---------------------------------------------------------------------------------------------------------------------------|------|---------|
| RPP30    | ENSG00000148688 | ribonuclease P/MRP 30kDa subunit [Source:HGNC Symbol;Acc:17688]<br>KDEL (Lys-Asp-Glu-Leu) containing 2 [Source:HGNC       | 1.54 | 1.5E-14 |
| KDELC2   | ENSG00000178202 | Symbol;Acc:28496]<br>intraflagellar transport 122 homolog (Chlamydomonas) [Source:HGNC                                    | 1.70 | 1.6E-14 |
| IFT122   | ENSG00000163913 | Symbol;Acc:13556]<br>HAUS augmin-like complex, subunit 6 [Source:HGNC                                                     | 1.53 | 1.6E-14 |
| HAUS6    | ENSG00000147874 | Symbol;Acc:25948]                                                                                                         | 1.63 | 1.6E-14 |
| ATRIP    | ENSG00000164053 | ATR interacting protein [Source:HGNC Symbol;Acc:33499]                                                                    | 1.65 | 1.6E-14 |
| NLE1     | ENSG00000073536 | notchless homolog 1 (Drosophila) [Source:HGNC Symbol;Acc:19889]<br>mago-nashi homolog B (Drosophila) [Source:HGNC         | 2.47 | 1.6E-14 |
| MAGOHB   | ENSG00000111196 | Symbol;Acc:25504]                                                                                                         | 1.46 | 1.6E-14 |
| GOLGA2P5 | ENSG00000238105 | golgin A2 pseudogene 5 [Source:HGNC Symbol;Acc:25315]                                                                     | 1.48 | 1.7E-14 |
| TGIF2    | ENSG00000118707 | TGFB-induced factor homeobox 2 [Source:HGNC Symbol;Acc:15764]                                                             | 1.66 | 1.8E-14 |
| ELAVL1   | ENSG00000066044 | ELAV like RNA binding protein 1 [Source:HGNC Symbol;Acc:3312]<br>male-specific lethal 3 homolog (Drosophila) pseudogene 1 | 0.98 | 1.9E-14 |
| MSL3P1   | ENSG00000224287 | [Source:HGNC Symbol;Acc:17837]<br>STEAP family member 3, metalloredutase [Source:HGNC                                     | 1.87 | 1.9E-14 |
| STEAP3   | ENSG00000115107 | Symbol;Acc:24592]                                                                                                         | 1.73 | 1.9E-14 |
| ZIC2     | ENSG00000043355 | Zic family member 2 [Source:HGNC Symbol;Acc:12873]                                                                        | 1.78 | 2.2E-14 |
| ACACA    | ENSG00000132142 | acetyl-CoA carboxylase alpha [Source:HGNC Symbol;Acc:84]                                                                  | 1.12 | 2.3E-14 |
| HMGB1    | ENSG00000189403 | high mobility group box 1 [Source:HGNC Symbol;Acc:4983]                                                                   | 1.32 | 2.3E-14 |
| TMEM177  | ENSG00000144120 | transmembrane protein 177 [Source:HGNC Symbol;Acc:28143]<br>SURP and G patch domain containing 2 [Source:HGNC             | 1.43 | 2.4E-14 |
| SUGP2    | ENSG00000064607 | Symbol;Acc:18641]                                                                                                         | 1.00 | 2.5E-14 |
| --       | ENSG00000254420 | --<br>centrobin, centrosomal BRCA2 interacting protein [Source:HGNC                                                       | 2.57 | 2.5E-14 |
| CNTROB   | ENSG00000170037 | Symbol;Acc:29616]                                                                                                         | 1.41 | 2.5E-14 |

|          |                 |                                                                                                                            |      |         |
|----------|-----------------|----------------------------------------------------------------------------------------------------------------------------|------|---------|
| FITM2    | ENSG00000197296 | fat storage-inducing transmembrane protein 2 [Source:HGNC Symbol;Acc:16135]                                                | 1.55 | 2.6E-14 |
| PVT1     | ENSG00000249859 | Pvt1 oncogene (non-protein coding) [Source:HGNC Symbol;Acc:9709]                                                           | 1.97 | 2.7E-14 |
| WDR89    | ENSG00000140006 | WD repeat domain 89 [Source:HGNC Symbol;Acc:20489]                                                                         | 1.59 | 2.9E-14 |
| --       | ENSG00000261762 | --                                                                                                                         | 4.70 | 2.9E-14 |
| RBBP7    | ENSG00000102054 | retinoblastoma binding protein 7 [Source:HGNC Symbol;Acc:9890]                                                             | 1.21 | 3.0E-14 |
| CDK5RAP1 | ENSG00000101391 | CDK5 regulatory subunit associated protein 1 [Source:HGNC Symbol;Acc:15880]                                                | 1.17 | 3.2E-14 |
| EHMT2    | ENSG00000204371 | euchromatic histone-lysine N-methyltransferase 2 [Source:HGNC Symbol;Acc:14129]                                            | 1.51 | 3.3E-14 |
| SLC25A38 | ENSG00000144659 | solute carrier family 25, member 38 [Source:HGNC Symbol;Acc:26054]                                                         | 1.15 | 3.4E-14 |
| ARAP3    | ENSG00000120318 | ArfGAP with RhoGAP domain, ankyrin repeat and PH domain 3 [Source:HGNC Symbol;Acc:24097]                                   | 1.77 | 3.6E-14 |
| NELFCD   | ENSG00000101158 | negative elongation factor complex member C/D [Source:HGNC Symbol;Acc:15934]                                               | 0.94 | 3.6E-14 |
| LYZ      | ENSG00000090382 | lysozyme [Source:HGNC Symbol;Acc:6740]                                                                                     | 1.41 | 3.8E-14 |
| FAM89A   | ENSG00000182118 | family with sequence similarity 89, member A [Source:HGNC Symbol;Acc:25057]                                                | 1.37 | 3.8E-14 |
| RPP40    | ENSG00000124787 | ribonuclease P/MRP 40kDa subunit [Source:HGNC Symbol;Acc:20992]                                                            | 2.55 | 3.9E-14 |
| NTPCR    | ENSG00000135778 | nucleoside-triphosphatase, cancer-related [Source:HGNC Symbol;Acc:28204]                                                   | 1.14 | 3.9E-14 |
| TAMM41   | ENSG00000144559 | TAM41, mitochondrial translocator assembly and maintenance protein, homolog (S. cerevisiae) [Source:HGNC Symbol;Acc:25187] | 1.47 | 4.0E-14 |
| KCTD12   | ENSG00000178695 | potassium channel tetramerization domain containing 12 [Source:HGNC Symbol;Acc:14678]                                      | 3.13 | 4.3E-14 |
| UTRN     | ENSG00000152818 | utrophin [Source:HGNC Symbol;Acc:12635]                                                                                    | 2.43 | 4.3E-14 |
| TMEM231  | ENSG00000205084 | transmembrane protein 231 [Source:HGNC Symbol;Acc:37234]                                                                   | 2.60 | 4.6E-14 |



|          |                 |                                                                                           |      |         |
|----------|-----------------|-------------------------------------------------------------------------------------------|------|---------|
| KLHL42   | ENSG00000087448 | kelch-like family member 42 [Source:HGNC Symbol;Acc:29252]                                | 1.36 | 4.8E-14 |
| GAS5     | ENSG00000234741 | growth arrest-specific 5 (non-protein coding) [Source:HGNC Symbol;Acc:16355]              | 1.40 | 4.9E-14 |
| RPAIN    | ENSG00000129197 | RPA interacting protein [Source:HGNC Symbol;Acc:28641]                                    | 1.34 | 4.9E-14 |
| --       | ENSG00000236144 | --                                                                                        | 1.57 | 5.2E-14 |
| NSL1     | ENSG00000117697 | NSL1, MIS12 kinetochore complex component [Source:HGNC Symbol;Acc:24548]                  | 1.56 | 5.2E-14 |
| NAV2     | ENSG00000166833 | neuron navigator 2 [Source:HGNC Symbol;Acc:15997]                                         | 1.32 | 5.2E-14 |
| CENPO    | ENSG00000138092 | centromere protein O [Source:HGNC Symbol;Acc:28152]                                       | 1.31 | 5.4E-14 |
| NKRF     | ENSG00000186416 | NFKB repressing factor [Source:HGNC Symbol;Acc:19374]                                     | 1.40 | 5.8E-14 |
| VSNL1    | ENSG00000163032 | visinin-like 1 [Source:HGNC Symbol;Acc:12722]                                             | 1.69 | 5.8E-14 |
| ANKRD13B | ENSG00000198720 | ankyrin repeat domain 13B [Source:HGNC Symbol;Acc:26363]                                  | 2.11 | 5.9E-14 |
| CACYBP   | ENSG00000116161 | calcyclin binding protein [Source:HGNC Symbol;Acc:30423]                                  | 1.09 | 6.2E-14 |
| C2orf70  | ENSG00000173557 | chromosome 2 open reading frame 70 [Source:HGNC Symbol;Acc:27938]                         | 3.45 | 6.4E-14 |
| NOL8     | ENSG00000198000 | nucleolar protein 8 [Source:HGNC Symbol;Acc:23387]                                        | 1.63 | 6.5E-14 |
| TTC12    | ENSG00000149292 | tetratricopeptide repeat domain 12 [Source:HGNC Symbol;Acc:23700]                         | 1.23 | 6.5E-14 |
| EFCAB4B  | ENSG00000130038 | EF-hand calcium binding domain 4B [Source:HGNC Symbol;Acc:28657]                          | 2.46 | 6.6E-14 |
| RANGRF   | ENSG00000108961 | RAN guanine nucleotide release factor [Source:HGNC Symbol;Acc:17679]                      | 1.73 | 6.8E-14 |
| TMEM138  | ENSG00000149483 | transmembrane protein 138 [Source:HGNC Symbol;Acc:26944]                                  | 1.14 | 7.6E-14 |
| PHF19    | ENSG00000119403 | PHD finger protein 19 [Source:HGNC Symbol;Acc:24566]                                      | 1.07 | 7.8E-14 |
| TRMU     | ENSG00000100416 | tRNA 5-methylaminomethyl-2-thiouridylate methyltransferase [Source:HGNC Symbol;Acc:25481] | 1.43 | 7.9E-14 |
| ZNF232   | ENSG00000167840 | zinc finger protein 232 [Source:HGNC Symbol;Acc:13026]                                    | 2.00 | 8.4E-14 |
| MRPS16   | ENSG00000182180 | mitochondrial ribosomal protein S16 [Source:HGNC Symbol;Acc:14048]                        | 0.87 | 8.4E-14 |

|          |                 |                                                                                                                                         |      |         |
|----------|-----------------|-----------------------------------------------------------------------------------------------------------------------------------------|------|---------|
| TFDP1    | ENSG00000198176 | transcription factor Dp-1 [Source:HGNC Symbol;Acc:11749]<br>nucleolar protein with MIF4G domain 1 [Source:HGNC                          | 1.27 | 9.0E-14 |
| NOM1     | ENSG00000146909 | Symbol;Acc:13244]<br>SET domain and mariner transposase fusion gene [Source:HGNC                                                        | 1.33 | 9.0E-14 |
| SETMAR   | ENSG00000170364 | Symbol;Acc:10762]                                                                                                                       | 2.48 | 9.2E-14 |
| CUEDC2   | ENSG00000107874 | CUE domain containing 2 [Source:HGNC Symbol;Acc:28352]<br>acid phosphatase 6, lysophosphatidic [Source:HGNC                             | 1.71 | 9.5E-14 |
| ACP6     | ENSG00000162836 | Symbol;Acc:29609]                                                                                                                       | 1.10 | 9.8E-14 |
| YBX1     | ENSG00000065978 | Y box binding protein 1 [Source:HGNC Symbol;Acc:8014]<br>DnaJ (Hsp40) homolog, subfamily A, member 3 [Source:HGNC                       | 1.04 | 1.1E-13 |
| DNAJA3   | ENSG00000103423 | Symbol;Acc:11808]<br>chromosome 1 open reading frame 109 [Source:HGNC                                                                   | 1.26 | 1.1E-13 |
| C1orf109 | ENSG00000116922 | Symbol;Acc:26039]                                                                                                                       | 1.48 | 1.1E-13 |
| TMEM5    | ENSG00000118600 | transmembrane protein 5 [Source:HGNC Symbol;Acc:13530]                                                                                  | 1.60 | 1.2E-13 |
| TMEM161A | ENSG00000064545 | transmembrane protein 161A [Source:HGNC Symbol;Acc:26020]                                                                               | 1.90 | 1.3E-13 |
| WDR92    | ENSG00000243667 | WD repeat domain 92 [Source:HGNC Symbol;Acc:25176]                                                                                      | 2.49 | 1.3E-13 |
| --       | ENSG00000258334 | --                                                                                                                                      | 3.36 | 1.3E-13 |
| ZNF202   | ENSG00000166261 | zinc finger protein 202 [Source:HGNC Symbol;Acc:12994]<br>UTP15, U3 small nucleolar ribonucleoprotein, homolog ( <i>S. cerevisiae</i> ) | 1.40 | 1.3E-13 |
| UTP15    | ENSG00000164338 | [Source:HGNC Symbol;Acc:25758]                                                                                                          | 1.82 | 1.4E-13 |
| FIGL1    | ENSG00000132436 | fidgetin-like 1 [Source:HGNC Symbol;Acc:13286]                                                                                          | 1.67 | 1.4E-13 |
| RPA3     | ENSG00000106399 | replication protein A3, 14kDa [Source:HGNC Symbol;Acc:10291]<br>GC-rich sequence DNA-binding factor 2 [Source:HGNC                      | 1.50 | 1.4E-13 |
| GCFC2    | ENSG00000005436 | Symbol;Acc:1317]                                                                                                                        | 1.58 | 1.4E-13 |
| TMPO-AS1 | ENSG00000257167 | TMPO antisense RNA 1 [Source:HGNC Symbol;Acc:44158]                                                                                     | 1.95 | 1.5E-13 |
| RPP25    | ENSG00000178718 | ribonuclease P/MRP 25kDa subunit [Source:HGNC Symbol;Acc:30361]<br>5'-nucleotidase domain containing 2 [Source:HGNC                     | 1.32 | 1.5E-13 |
| NT5DC2   | ENSG00000168268 | Symbol;Acc:25717]                                                                                                                       | 1.58 | 1.6E-13 |

|          |                 |                                                                                                                     |      |         |
|----------|-----------------|---------------------------------------------------------------------------------------------------------------------|------|---------|
| TMTC4    | ENSG00000125247 | transmembrane and tetratricopeptide repeat containing 4 [Source:HGNC Symbol;Acc:25904]                              | 1.53 | 1.6E-13 |
| TTI1     | ENSG00000101407 | TELO2 interacting protein 1 [Source:HGNC Symbol;Acc:29029]                                                          | 1.46 | 1.6E-13 |
| ERCC8    | ENSG00000049167 | excision repair cross-complementing rodent repair deficiency, complementation group 8 [Source:HGNC Symbol;Acc:3439] | 1.77 | 1.6E-13 |
| TCEAL8   | ENSG00000180964 | transcription elongation factor A (SII)-like 8 [Source:HGNC Symbol;Acc:28683]                                       | 1.51 | 1.7E-13 |
| TPGS2    | ENSG00000134779 | tubulin polyglutamylase complex subunit 2 [Source:HGNC Symbol;Acc:24561]                                            | 1.24 | 1.8E-13 |
| TMEM243  | ENSG00000135185 | transmembrane protein 243, mitochondrial [Source:HGNC Symbol;Acc:21707]                                             | 1.37 | 1.8E-13 |
| NSMAF    | ENSG00000035681 | neutral sphingomyelinase (N-SMase) activation associated factor [Source:HGNC Symbol;Acc:8017]                       | 1.00 | 1.9E-13 |
| SSB      | ENSG00000138385 | Sjogren syndrome antigen B (autoantigen La) [Source:HGNC Symbol;Acc:11316]                                          | 1.44 | 2.1E-13 |
| SSX2IP   | ENSG00000117155 | synovial sarcoma, X breakpoint 2 interacting protein [Source:HGNC Symbol;Acc:16509]                                 | 1.96 | 2.1E-13 |
| FAIM2    | ENSG00000135472 | Fas apoptotic inhibitory molecule 2 [Source:HGNC Symbol;Acc:17067]                                                  | 4.31 | 2.3E-13 |
| CCDC150  | ENSG00000144395 | coiled-coil domain containing 150 [Source:HGNC Symbol;Acc:26834]                                                    | 3.53 | 2.3E-13 |
| PSIP1    | ENSG00000164985 | PC4 and SFRS1 interacting protein 1 [Source:HGNC Symbol;Acc:9527]                                                   | 2.05 | 2.3E-13 |
| TMEM237  | ENSG00000155755 | transmembrane protein 237 [Source:HGNC Symbol;Acc:14432]                                                            | 1.76 | 2.3E-13 |
| --       | ENSG00000235837 | --                                                                                                                  | 1.40 | 2.4E-13 |
| SLC5A6   | ENSG00000138074 | solute carrier family 5 (sodium/multivitamin and iodide cotransporter), member 6 [Source:HGNC Symbol;Acc:11041]     | 1.26 | 2.6E-13 |
| C17orf89 | ENSG00000224877 | chromosome 17 open reading frame 89 [Source:HGNC Symbol;Acc:33551]                                                  | 1.78 | 2.6E-13 |
| RFC2     | ENSG00000049541 | replication factor C (activator 1) 2, 40kDa [Source:HGNC Symbol;Acc:9970]                                           | 1.30 | 2.7E-13 |

|           |                 |                                                                                                 |      |         |
|-----------|-----------------|-------------------------------------------------------------------------------------------------|------|---------|
| MRPL35    | ENSG00000132313 | mitochondrial ribosomal protein L35 [Source:HGNC Symbol;Acc:14489]                              | 1.13 | 2.8E-13 |
| XPO4      | ENSG00000132953 | exportin 4 [Source:HGNC Symbol;Acc:17796]                                                       | 1.74 | 2.8E-13 |
| NFIC      | ENSG00000141905 | nuclear factor I/C (CCAAT-binding transcription factor) [Source:HGNC Symbol;Acc:7786]           | 1.43 | 2.9E-13 |
| SPG21     | ENSG00000090487 | spastic paraplegia 21 (autosomal recessive, Mast syndrome) [Source:HGNC Symbol;Acc:20373]       | 1.10 | 3.0E-13 |
| E2F2      | ENSG00000007968 | E2F transcription factor 2 [Source:HGNC Symbol;Acc:3114]                                        | 2.46 | 3.0E-13 |
| WDR41     | ENSG00000164253 | WD repeat domain 41 [Source:HGNC Symbol;Acc:25601]                                              | 1.38 | 3.1E-13 |
| --        | ENSG00000257764 | --                                                                                              | 1.47 | 3.1E-13 |
| PARK7     | ENSG00000116288 | parkinson protein 7 [Source:HGNC Symbol;Acc:16369]                                              | 1.08 | 3.1E-13 |
| ACTL8     | ENSG00000117148 | actin-like 8 [Source:HGNC Symbol;Acc:24018]                                                     | 4.10 | 3.2E-13 |
| UQCRH     | ENSG00000173660 | ubiquinol-cytochrome c reductase hinge protein [Source:HGNC Symbol;Acc:12590]                   | 0.86 | 3.5E-13 |
| ZKSCAN8   | ENSG00000198315 | zinc finger with KRAB and SCAN domains 8 [Source:HGNC Symbol;Acc:12983]                         | 1.72 | 3.6E-13 |
| CCDC66    | ENSG00000180376 | coiled-coil domain containing 66 [Source:HGNC Symbol;Acc:27709]                                 | 1.44 | 3.6E-13 |
| ARSE      | ENSG00000157399 | arylsulfatase E (chondrodysplasia punctata 1) [Source:HGNC Symbol;Acc:719]                      | 1.27 | 3.8E-13 |
| CHAMP1    | ENSG00000198824 | chromosome alignment maintaining phosphoprotein 1 [Source:HGNC Symbol;Acc:20311]                | 1.65 | 3.9E-13 |
| --        | ENSG00000270189 | --                                                                                              | 2.14 | 3.9E-13 |
| RPS24     | ENSG00000138326 | ribosomal protein S24 [Source:HGNC Symbol;Acc:10411]                                            | 1.16 | 3.9E-13 |
| MRTO4     | ENSG00000053372 | mRNA turnover 4 homolog ( <i>S. cerevisiae</i> ) [Source:HGNC Symbol;Acc:18477]                 | 1.16 | 4.0E-13 |
| C14orf159 | ENSG00000133943 | chromosome 14 open reading frame 159 [Source:HGNC Symbol;Acc:20498]                             | 1.13 | 4.0E-13 |
| NDUFAB1   | ENSG00000004779 | NADH dehydrogenase (ubiquinone) 1, alpha/beta subcomplex, 1, 8kDa [Source:HGNC Symbol;Acc:7694] | 0.99 | 4.2E-13 |

|            |                 |                                                                                                              |      |         |
|------------|-----------------|--------------------------------------------------------------------------------------------------------------|------|---------|
| DPH1       | ENSG00000108963 | diphthamide biosynthesis 1 [Source:HGNC Symbol;Acc:3003]                                                     | 1.97 | 4.2E-13 |
| ALG3       | ENSG00000214160 | ALG3, alpha-1,3- mannosyltransferase [Source:HGNC Symbol;Acc:23056]                                          | 1.60 | 4.2E-13 |
| EIF4B      | ENSG00000063046 | eukaryotic translation initiation factor 4B [Source:HGNC Symbol;Acc:3285]                                    | 0.98 | 4.4E-13 |
| ERI3       | ENSG00000117419 | ERI1 exoribonuclease family member 3 [Source:HGNC Symbol;Acc:17276]                                          | 1.45 | 4.5E-13 |
| NUP93      | ENSG00000102900 | nucleoporin 93kDa [Source:HGNC Symbol;Acc:28958]                                                             | 1.57 | 4.5E-13 |
| MTR        | ENSG00000116984 | 5-methyltetrahydrofolate-homocysteine methyltransferase [Source:HGNC Symbol;Acc:7468]                        | 1.25 | 4.7E-13 |
| UBXN8      | ENSG00000104691 | UBX domain protein 8 [Source:HGNC Symbol;Acc:30307]                                                          | 2.03 | 5.0E-13 |
| FAM168A    | ENSG00000054965 | family with sequence similarity 168, member A [Source:HGNC Symbol;Acc:28999]                                 | 1.63 | 5.1E-13 |
| --         | ENSG00000267328 | --                                                                                                           | 3.84 | 5.1E-13 |
| DLGAP1-AS2 | ENSG00000262001 | DLGAP1 antisense RNA 2 [Source:HGNC Symbol;Acc:28146]                                                        | 1.89 | 5.3E-13 |
| --         | ENSG00000248835 | CDNA: FLJ21031 fis, clone CAE07336; HCG1780521; Uncharacterized protein [Source:UniProtKB/TrEMBL;Acc:Q9H7D2] | 3.06 | 5.4E-13 |
| ATPAF1     | ENSG00000123472 | ATP synthase mitochondrial F1 complex assembly factor 1 [Source:HGNC Symbol;Acc:18803]                       | 1.20 | 5.6E-13 |
| CCDC115    | ENSG00000136710 | coiled-coil domain containing 115 [Source:HGNC Symbol;Acc:28178]                                             | 0.98 | 5.6E-13 |
| PM20D2     | ENSG00000146281 | peptidase M20 domain containing 2 [Source:HGNC Symbol;Acc:21408]                                             | 2.09 | 5.7E-13 |
| HSF2       | ENSG00000025156 | heat shock transcription factor 2 [Source:HGNC Symbol;Acc:5225]                                              | 2.03 | 5.7E-13 |
| PTMA       | ENSG00000187514 | prothymosin, alpha [Source:HGNC Symbol;Acc:9623]                                                             | 1.18 | 6.0E-13 |
| PHTF2      | ENSG00000006576 | putative homeodomain transcription factor 2 [Source:HGNC Symbol;Acc:13411]                                   | 1.59 | 6.1E-13 |
| COQ2       | ENSG00000173085 | coenzyme Q2 4-hydroxybenzoate polyprenyltransferase [Source:HGNC Symbol;Acc:25223]                           | 1.38 | 6.4E-13 |

|          |                 |                                                                                                                                   |      |         |
|----------|-----------------|-----------------------------------------------------------------------------------------------------------------------------------|------|---------|
| KREMEN1  | ENSG00000183762 | kringle containing transmembrane protein 1 [Source:HGNC Symbol;Acc:17550]                                                         | 1.42 | 6.5E-13 |
| TMEM178B | ENSG00000261115 | transmembrane protein 178B [Source:HGNC Symbol;Acc:44112]                                                                         | 1.84 | 6.5E-13 |
| EXOSC7   | ENSG00000075914 | exosome component 7 [Source:HGNC Symbol;Acc:28112]                                                                                | 1.14 | 6.5E-13 |
| --       | ENSG00000257588 | --                                                                                                                                | 3.92 | 6.6E-13 |
| SEC31B   | ENSG00000075826 | SEC31 homolog B ( <i>S. cerevisiae</i> ) [Source:HGNC Symbol;Acc:23197]                                                           | 1.67 | 6.6E-13 |
| SPEF2    | ENSG00000152582 | sperm flagellar 2 [Source:HGNC Symbol;Acc:26293]                                                                                  | 2.49 | 6.8E-13 |
| MRPL34   | ENSG00000130312 | mitochondrial ribosomal protein L34 [Source:HGNC Symbol;Acc:14488]                                                                | 1.47 | 6.9E-13 |
| C18orf56 | ENSG00000176912 | chromosome 18 open reading frame 56 [Source:HGNC Symbol;Acc:29553]                                                                | 3.54 | 7.0E-13 |
| CA8      | ENSG00000178538 | carbonic anhydrase VIII [Source:HGNC Symbol;Acc:1382]                                                                             | 3.72 | 7.0E-13 |
| LGR6     | ENSG00000133067 | leucine-rich repeat containing G protein-coupled receptor 6 [Source:HGNC Symbol;Acc:19719]                                        | 2.56 | 7.0E-13 |
| EEF1E1   | ENSG00000124802 | eukaryotic translation elongation factor 1 epsilon 1 [Source:HGNC Symbol;Acc:3212]                                                | 2.08 | 7.1E-13 |
| ARMC9    | ENSG00000135931 | armadillo repeat containing 9 [Source:HGNC Symbol;Acc:20730]                                                                      | 1.70 | 7.4E-13 |
| KLHL23   | ENSG00000213160 | kelch-like family member 23 [Source:HGNC Symbol;Acc:27506]                                                                        | 1.85 | 7.5E-13 |
| C9orf40  | ENSG00000135045 | chromosome 9 open reading frame 40 [Source:HGNC Symbol;Acc:23433]                                                                 | 1.68 | 7.6E-13 |
| ATP5A1   | ENSG00000152234 | ATP synthase, H <sup>+</sup> transporting, mitochondrial F1 complex, alpha subunit 1, cardiac muscle [Source:HGNC Symbol;Acc:823] | 0.89 | 7.7E-13 |
| ABCF2    | ENSG00000033050 | ATP-binding cassette, sub-family F (GCN20), member 2 [Source:HGNC Symbol;Acc:71]                                                  | 1.27 | 8.0E-13 |
| DNAJC19  | ENSG00000205981 | DnaJ (Hsp40) homolog, subfamily C, member 19 [Source:HGNC Symbol;Acc:30528]                                                       | 1.29 | 8.1E-13 |
| RPL7A    | ENSG00000148303 | ribosomal protein L7a [Source:HGNC Symbol;Acc:10364]                                                                              | 1.10 | 8.2E-13 |
| SRSF1    | ENSG00000136450 | serine/arginine-rich splicing factor 1 [Source:HGNC Symbol;Acc:10780]                                                             | 0.97 | 8.4E-13 |

|         |                 |                                                                                                |      |         |
|---------|-----------------|------------------------------------------------------------------------------------------------|------|---------|
| MSANTD4 | ENSG00000170903 | Myb/SANT-like DNA-binding domain containing 4 with coiled-coils [Source:HGNC Symbol;Acc:29383] | 1.61 | 9.1E-13 |
| MTERFD1 | ENSG00000156469 | MTERF domain containing 1 [Source:HGNC Symbol;Acc:24258]                                       | 1.61 | 9.1E-13 |
| DARS2   | ENSG00000117593 | aspartyl-tRNA synthetase 2, mitochondrial [Source:HGNC Symbol;Acc:25538]                       | 1.45 | 9.1E-13 |
| RPUSD3  | ENSG00000156990 | RNA pseudouridylate synthase domain containing 3 [Source:HGNC Symbol;Acc:28437]                | 1.20 | 9.1E-13 |
| FMOD    | ENSG00000122176 | fibromodulin [Source:HGNC Symbol;Acc:3774]                                                     | 1.72 | 1.0E-12 |
| AMPD2   | ENSG00000116337 | adenosine monophosphate deaminase 2 [Source:HGNC Symbol;Acc:469]                               | 1.24 | 1.0E-12 |
| MYB-AS1 | ENSG00000236703 | MYB antisense RNA 1 [Source:HGNC Symbol;Acc:37457]                                             | 3.07 | 1.0E-12 |
| FZD3    | ENSG00000104290 | frizzled family receptor 3 [Source:HGNC Symbol;Acc:4041]                                       | 2.07 | 1.1E-12 |
| ZNF771  | ENSG00000179965 | zinc finger protein 771 [Source:HGNC Symbol;Acc:29653]                                         | 1.76 | 1.1E-12 |
| PRKX    | ENSG00000183943 | protein kinase, X-linked [Source:HGNC Symbol;Acc:9441]                                         | 1.26 | 1.1E-12 |
| ERH     | ENSG00000100632 | enhancer of rudimentary homolog (Drosophila) [Source:HGNC Symbol;Acc:3447]                     | 1.22 | 1.2E-12 |
| PPIL1   | ENSG00000137168 | peptidylprolyl isomerase (cyclophilin)-like 1 [Source:HGNC Symbol;Acc:9260]                    | 1.54 | 1.2E-12 |
| TOMM20  | ENSG00000173726 | translocase of outer mitochondrial membrane 20 homolog (yeast) [Source:HGNC Symbol;Acc:20947]  | 1.09 | 1.2E-12 |
| RPL32   | ENSG00000144713 | ribosomal protein L32 [Source:HGNC Symbol;Acc:10336]                                           | 1.21 | 1.3E-12 |
| CHDH    | ENSG00000016391 | choline dehydrogenase [Source:HGNC Symbol;Acc:24288]                                           | 0.98 | 1.3E-12 |
| ZDHHC23 | ENSG00000184307 | zinc finger, DHHC-type containing 23 [Source:HGNC Symbol;Acc:28654]                            | 1.51 | 1.4E-12 |
| FZD7    | ENSG00000155760 | frizzled family receptor 7 [Source:HGNC Symbol;Acc:4045]                                       | 1.99 | 1.4E-12 |
| DCAKD   | ENSG00000172992 | dephospho-CoA kinase domain containing [Source:HGNC Symbol;Acc:26238]                          | 1.77 | 1.5E-12 |
| SRR     | ENSG00000167720 | serine racemase [Source:HGNC Symbol;Acc:14398]                                                 | 1.14 | 1.5E-12 |
| TXNDC16 | ENSG00000087301 | thioredoxin domain containing 16 [Source:HGNC Symbol;Acc:19965]                                | 2.27 | 1.5E-12 |

|          |                 |                                                                                           |      |         |
|----------|-----------------|-------------------------------------------------------------------------------------------|------|---------|
| --       | ENSG00000256690 | --                                                                                        | 1.54 | 1.6E-12 |
| SERBP1   | ENSG00000142864 | SERPINE1 mRNA binding protein 1 [Source:HGNC Symbol;Acc:17860]                            | 1.07 | 1.7E-12 |
| CPOX     | ENSG00000080819 | coproporphyrinogen oxidase [Source:HGNC Symbol;Acc:2321]                                  | 1.41 | 1.7E-12 |
| DNMT3B   | ENSG00000088305 | DNA (cytosine-5-)-methyltransferase 3 beta [Source:HGNC Symbol;Acc:2979]                  | 1.88 | 1.7E-12 |
| MIS18BP1 | ENSG00000129534 | MIS18 binding protein 1 [Source:HGNC Symbol;Acc:20190]                                    | 1.96 | 1.7E-12 |
| C12orf66 | ENSG00000174206 | chromosome 12 open reading frame 66 [Source:HGNC Symbol;Acc:26517]                        | 1.63 | 1.8E-12 |
| NAP1L1   | ENSG00000187109 | nucleosome assembly protein 1-like 1 [Source:HGNC Symbol;Acc:7637]                        | 1.41 | 1.8E-12 |
| PIAS2    | ENSG00000078043 | protein inhibitor of activated STAT, 2 [Source:HGNC Symbol;Acc:17311]                     | 1.44 | 1.9E-12 |
| PNO1     | ENSG00000115946 | partner of NOB1 homolog ( <i>S. cerevisiae</i> ) [Source:HGNC Symbol;Acc:32790]           | 1.70 | 1.9E-12 |
| MDH1     | ENSG00000014641 | malate dehydrogenase 1, NAD (soluble) [Source:HGNC Symbol;Acc:6970]                       | 1.01 | 1.9E-12 |
| GNPDA1   | ENSG00000113552 | glucosamine-6-phosphate deaminase 1 [Source:HGNC Symbol;Acc:4417]                         | 1.19 | 1.9E-12 |
| PRCP     | ENSG00000137509 | prolylcarboxypeptidase (angiotensinase C) [Source:HGNC Symbol;Acc:9344]                   | 1.16 | 1.9E-12 |
| LGR5     | ENSG00000139292 | leucine-rich repeat containing G protein-coupled receptor 5 [Source:HGNC Symbol;Acc:4504] | 4.71 | 1.9E-12 |
| CEP41    | ENSG00000106477 | centrosomal protein 41kDa [Source:HGNC Symbol;Acc:12370]                                  | 2.05 | 1.9E-12 |
| PAIP2B   | ENSG00000124374 | poly(A) binding protein interacting protein 2B [Source:HGNC Symbol;Acc:29200]             | 2.63 | 2.0E-12 |
| PIGW     | ENSG00000184886 | phosphatidylinositol glycan anchor biosynthesis, class W [Source:HGNC Symbol;Acc:23213]   | 1.72 | 2.0E-12 |
| FASTKD2  | ENSG00000118246 | FAST kinase domains 2 [Source:HGNC Symbol;Acc:29160]                                      | 1.41 | 2.1E-12 |



|            |                 |                                                                                             |      |         |
|------------|-----------------|---------------------------------------------------------------------------------------------|------|---------|
| NAF1       | ENSG00000145414 | nuclear assembly factor 1 ribonucleoprotein [Source:HGNC Symbol;Acc:25126]                  | 1.82 | 2.1E-12 |
| VWA8       | ENSG00000102763 | von Willebrand factor A domain containing 8 [Source:HGNC Symbol;Acc:29071]                  | 1.92 | 2.1E-12 |
| NOP2       | ENSG00000111641 | NOP2 nucleolar protein [Source:HGNC Symbol;Acc:7867]                                        | 1.35 | 2.2E-12 |
| NUDT5      | ENSG00000165609 | nudix (nucleoside diphosphate linked moiety X)-type motif 5 [Source:HGNC Symbol;Acc:8052]   | 1.06 | 2.2E-12 |
| MPLKIP     | ENSG00000168303 | M-phase specific PLK1 interacting protein [Source:HGNC Symbol;Acc:16002]                    | 1.07 | 2.3E-12 |
| RNF157-AS1 | ENSG00000267128 | RNF157 antisense RNA 1 [Source:HGNC Symbol;Acc:44127]                                       | 1.66 | 2.3E-12 |
| SNX5       | ENSG00000089006 | sorting nexin 5 [Source:HGNC Symbol;Acc:14969]                                              | 1.27 | 2.3E-12 |
| FLVCR1     | ENSG00000162769 | feline leukemia virus subgroup C cellular receptor 1 [Source:HGNC Symbol;Acc:24682]         | 1.22 | 2.4E-12 |
| MYL6B      | ENSG00000196465 | myosin, light chain 6B, alkali, smooth muscle and non-muscle [Source:HGNC Symbol;Acc:29823] | 2.09 | 2.4E-12 |
| PPT1       | ENSG00000131238 | palmitoyl-protein thioesterase 1 [Source:HGNC Symbol;Acc:9325]                              | 1.15 | 2.5E-12 |
| CNNM3      | ENSG00000168763 | cyclin M3 [Source:HGNC Symbol;Acc:104]                                                      | 1.26 | 2.5E-12 |
| MRP63      | ENSG00000173141 | mitochondrial ribosomal protein 63 [Source:HGNC Symbol;Acc:14514]                           | 1.23 | 2.6E-12 |
| POGLUT1    | ENSG00000163389 | protein O-glucosyltransferase 1 [Source:HGNC Symbol;Acc:22954]                              | 1.47 | 2.6E-12 |
| RNASEH1-AS | ENSG00000234171 | RNASEH1 antisense RNA 1 [Source:HGNC Symbol;Acc:49289]                                      | 2.31 | 2.6E-12 |
| RNF166     | ENSG00000158717 | ring finger protein 166 [Source:HGNC Symbol;Acc:28856]                                      | 1.99 | 2.6E-12 |
| DLEU2      | ENSG00000231607 | deleted in lymphocytic leukemia 2 (non-protein coding) [Source:HGNC Symbol;Acc:13748]       | 2.50 | 2.8E-12 |
| EIF3E      | ENSG00000104408 | eukaryotic translation initiation factor 3, subunit E [Source:HGNC Symbol;Acc:3277]         | 1.30 | 2.8E-12 |
| ZNF343     | ENSG00000088876 | zinc finger protein 343 [Source:HGNC Symbol;Acc:16017]                                      | 1.45 | 2.9E-12 |
| G6PC3      | ENSG00000141349 | glucose 6 phosphatase, catalytic, 3 [Source:HGNC Symbol;Acc:24861]                          | 1.78 | 2.9E-12 |

|         |                 |                                                                                                 |      |         |
|---------|-----------------|-------------------------------------------------------------------------------------------------|------|---------|
| PATZ1   | ENSG00000100105 | POZ (BTB) and AT hook containing zinc finger 1 [Source:HGNC Symbol;Acc:13071]                   | 1.23 | 3.0E-12 |
| --      | ENSG00000179859 | --                                                                                              | 2.29 | 3.0E-12 |
| RIBC2   | ENSG00000128408 | RIB43A domain with coiled-coils 2 [Source:HGNC Symbol;Acc:13241]                                | 4.11 | 3.1E-12 |
| MRPL21  | ENSG00000197345 | mitochondrial ribosomal protein L21 [Source:HGNC Symbol;Acc:14479]                              | 1.13 | 3.1E-12 |
| MBIP    | ENSG00000151332 | MAP3K12 binding inhibitory protein 1 [Source:HGNC Symbol;Acc:20427]                             | 1.62 | 3.1E-12 |
| FAM169A | ENSG00000198780 | family with sequence similarity 169, member A [Source:HGNC Symbol;Acc:29138]                    | 2.99 | 3.2E-12 |
| RPL11   | ENSG00000142676 | ribosomal protein L11 [Source:HGNC Symbol;Acc:10301]                                            | 1.04 | 3.2E-12 |
| ACTR3B  | ENSG00000133627 | ARP3 actin-related protein 3 homolog B (yeast) [Source:HGNC Symbol;Acc:17256]                   | 1.90 | 3.3E-12 |
| MRE11A  | ENSG00000020922 | MRE11 meiotic recombination 11 homolog A ( <i>S. cerevisiae</i> ) [Source:HGNC Symbol;Acc:7230] | 1.56 | 3.3E-12 |
| TCTN1   | ENSG00000204852 | tectonic family member 1 [Source:HGNC Symbol;Acc:26113]                                         | 1.56 | 3.3E-12 |
| DIEXF   | ENSG00000117597 | digestive organ expansion factor homolog (zebrafish) [Source:HGNC Symbol;Acc:28440]             | 1.31 | 3.3E-12 |
| TGFBR3  | ENSG00000069702 | transforming growth factor, beta receptor III [Source:HGNC Symbol;Acc:11774]                    | 1.89 | 3.3E-12 |
| HEATR3  | ENSG00000155393 | HEAT repeat containing 3 [Source:HGNC Symbol;Acc:26087]                                         | 1.23 | 3.3E-12 |
| RUVBL1  | ENSG00000175792 | RuvB-like AAA ATPase 1 [Source:HGNC Symbol;Acc:10474]                                           | 1.39 | 3.4E-12 |
| --      | ENSG00000265415 | --                                                                                              | 3.18 | 3.4E-12 |
| MRPS30  | ENSG00000112996 | mitochondrial ribosomal protein S30 [Source:HGNC Symbol;Acc:8769]                               | 1.49 | 3.5E-12 |
| WDR27   | ENSG00000184465 | WD repeat domain 27 [Source:HGNC Symbol;Acc:21248]                                              | 1.40 | 3.6E-12 |
| TMEM216 | ENSG00000187049 | transmembrane protein 216 [Source:HGNC Symbol;Acc:25018]                                        | 1.24 | 3.7E-12 |
| FAM136A | ENSG00000035141 | family with sequence similarity 136, member A [Source:HGNC Symbol;Acc:25911]                    | 0.83 | 3.8E-12 |

|           |                 |                                                                                                       |      |         |
|-----------|-----------------|-------------------------------------------------------------------------------------------------------|------|---------|
| LINC00338 | ENSG00000234912 | long intergenic non-protein coding RNA 338 [Source:HGNC Symbol;Acc:33099]                             | 1.71 | 3.9E-12 |
| DLL1      | ENSG00000198719 | delta-like 1 (Drosophila) [Source:HGNC Symbol;Acc:2908]                                               | 2.79 | 4.0E-12 |
| PRDX3     | ENSG00000165672 | peroxiredoxin 3 [Source:HGNC Symbol;Acc:9354]                                                         | 1.51 | 4.0E-12 |
| --        | ENSG00000224645 | --                                                                                                    | 1.72 | 4.1E-12 |
| ALDH5A1   | ENSG00000112294 | aldehyde dehydrogenase 5 family, member A1 [Source:HGNC Symbol;Acc:408]                               | 1.73 | 4.2E-12 |
| RNF43     | ENSG00000108375 | ring finger protein 43 [Source:HGNC Symbol;Acc:18505]                                                 | 1.17 | 4.3E-12 |
| CHSY1     | ENSG00000131873 | chondroitin sulfate synthase 1 [Source:HGNC Symbol;Acc:17198]                                         | 1.67 | 4.3E-12 |
| --        | ENSG00000269416 | --                                                                                                    | 1.84 | 4.4E-12 |
| PODXL2    | ENSG00000114631 | podocalyxin-like 2 [Source:HGNC Symbol;Acc:17936]                                                     | 1.54 | 4.5E-12 |
| CENPL     | ENSG00000120334 | centromere protein L [Source:HGNC Symbol;Acc:17879]                                                   | 1.70 | 4.5E-12 |
| DFFA      | ENSG00000160049 | DNA fragmentation factor, 45kDa, alpha polypeptide [Source:HGNC Symbol;Acc:2772]                      | 1.10 | 4.6E-12 |
| MNS1      | ENSG00000138587 | meiosis-specific nuclear structural 1 [Source:HGNC Symbol;Acc:29636]                                  | 3.59 | 4.7E-12 |
| PRKCQ-AS1 | ENSG00000237943 | PRKCQ antisense RNA 1 [Source:HGNC Symbol;Acc:44689]                                                  | 3.48 | 4.8E-12 |
| TPM2      | ENSG00000198467 | tropomyosin 2 (beta) [Source:HGNC Symbol;Acc:12011]                                                   | 1.21 | 4.8E-12 |
| RNF26     | ENSG00000173456 | ring finger protein 26 [Source:HGNC Symbol;Acc:14646]                                                 | 1.16 | 4.8E-12 |
| --        | ENSG00000271754 | --                                                                                                    | 1.69 | 4.9E-12 |
| MRPL51    | ENSG00000111639 | mitochondrial ribosomal protein L51 [Source:HGNC Symbol;Acc:14044]                                    | 0.86 | 5.1E-12 |
| ACBD6     | ENSG00000135847 | acyl-CoA binding domain containing 6 [Source:HGNC Symbol;Acc:23339]                                   | 1.29 | 5.1E-12 |
| SESN1     | ENSG00000080546 | sestrin 1 [Source:HGNC Symbol;Acc:21595]                                                              | 1.37 | 5.1E-12 |
| CSTF2T    | ENSG00000177613 | cleavage stimulation factor, 3' pre-RNA, subunit 2, 64kDa, tau variant [Source:HGNC Symbol;Acc:17086] | 1.34 | 5.2E-12 |
| LINC00858 | ENSG00000229404 | long intergenic non-protein coding RNA 858 [Source:HGNC Symbol;Acc:27276]                             | 2.19 | 5.3E-12 |

|            |                 |                                                                                                        |      |         |
|------------|-----------------|--------------------------------------------------------------------------------------------------------|------|---------|
| NNT        | ENSG00000112992 | nicotinamide nucleotide transhydrogenase [Source:HGNC Symbol;Acc:7863]                                 | 1.27 | 5.6E-12 |
| TMEM116    | ENSG00000198270 | transmembrane protein 116 [Source:HGNC Symbol;Acc:25084]                                               | 2.11 | 6.0E-12 |
| CYP39A1    | ENSG00000146233 | cytochrome P450, family 39, subfamily A, polypeptide 1 [Source:HGNC Symbol;Acc:17449]                  | 4.27 | 6.1E-12 |
| RUVBL2     | ENSG00000183207 | RuvB-like AAA ATPase 2 [Source:HGNC Symbol;Acc:10475]                                                  | 1.29 | 6.1E-12 |
| HOXB5      | ENSG00000120075 | homeobox B5 [Source:HGNC Symbol;Acc:5116]                                                              | 1.37 | 6.6E-12 |
| ALDH9A1    | ENSG00000143149 | aldehyde dehydrogenase 9 family, member A1 [Source:HGNC Symbol;Acc:412]                                | 1.10 | 6.6E-12 |
| RPUSD2     | ENSG00000166133 | RNA pseudouridylate synthase domain containing 2 [Source:HGNC Symbol;Acc:24180]                        | 1.66 | 6.7E-12 |
| ZNF32      | ENSG00000169740 | zinc finger protein 32 [Source:HGNC Symbol;Acc:13095]                                                  | 1.83 | 6.7E-12 |
| WRAP53     | ENSG00000141499 | WD repeat containing, antisense to TP53 [Source:HGNC Symbol;Acc:25522]                                 | 1.71 | 6.8E-12 |
| --         | ENSG00000236498 | --                                                                                                     | 0.97 | 6.9E-12 |
| PAXIP1-AS1 | ENSG00000273344 | PAXIP1 antisense RNA 1 (head to head) [Source:HGNC Symbol;Acc:27328]                                   | 1.62 | 6.9E-12 |
| TEX30      | ENSG00000151287 | testis expressed 30 [Source:HGNC Symbol;Acc:25188]                                                     | 1.78 | 6.9E-12 |
| COA4       | ENSG00000181924 | cytochrome c oxidase assembly factor 4 homolog ( <i>S. cerevisiae</i> ) [Source:HGNC Symbol;Acc:24604] | 1.01 | 6.9E-12 |
| CACNA1D    | ENSG00000157388 | calcium channel, voltage-dependent, L type, alpha 1D subunit [Source:HGNC Symbol;Acc:1391]             | 1.39 | 7.1E-12 |
| SGOL1-AS1  | ENSG00000237485 | SGOL1 antisense RNA 1 [Source:HGNC Symbol;Acc:41081]                                                   | 3.14 | 7.2E-12 |
| --         | ENSG00000171282 | BAH and coiled-coil domain-containing protein 1 [Source:RefSeq peptide;Acc:NP_001073988]               | 1.56 | 7.2E-12 |
| MRPL9      | ENSG00000143436 | mitochondrial ribosomal protein L9 [Source:HGNC Symbol;Acc:14277]                                      | 0.93 | 7.4E-12 |
| IMP3       | ENSG00000177971 | IMP3, U3 small nucleolar ribonucleoprotein, homolog (yeast) [Source:HGNC Symbol;Acc:14497]             | 0.99 | 7.6E-12 |

|          |                 |                                                                                                                             |      |         |
|----------|-----------------|-----------------------------------------------------------------------------------------------------------------------------|------|---------|
| FOXA2    | ENSG00000125798 | forkhead box A2 [Source:HGNC Symbol;Acc:5022]<br>translocase of outer mitochondrial membrane 22 homolog (yeast)             | 1.11 | 7.9E-12 |
| TOMM22   | ENSG00000100216 | [Source:HGNC Symbol;Acc:18002]                                                                                              | 1.03 | 7.9E-12 |
| HABP2    | ENSG00000148702 | hyaluronan binding protein 2 [Source:HGNC Symbol;Acc:4798]                                                                  | 4.34 | 8.4E-12 |
| TMEM201  | ENSG00000188807 | transmembrane protein 201 [Source:HGNC Symbol;Acc:33719]                                                                    | 2.63 | 8.5E-12 |
| NOTCH1   | ENSG00000148400 | notch 1 [Source:HGNC Symbol;Acc:7881]                                                                                       | 1.69 | 8.6E-12 |
| --       | ENSG00000257222 | --                                                                                                                          | 1.46 | 9.0E-12 |
| TCF19    | ENSG00000137310 | transcription factor 19 [Source:HGNC Symbol;Acc:11629]                                                                      | 1.15 | 9.1E-12 |
| MARVELD1 | ENSG00000155254 | MARVEL domain containing 1 [Source:HGNC Symbol;Acc:28674]<br>ATPase, H <sup>+</sup> transporting V0 subunit e2 [Source:HGNC | 1.09 | 9.2E-12 |
| ATP6V0E2 | ENSG00000171130 | Symbol;Acc:21723]                                                                                                           | 1.81 | 9.3E-12 |
| KIAA0586 | ENSG00000100578 | KIAA0586 [Source:HGNC Symbol;Acc:19960]                                                                                     | 1.62 | 9.3E-12 |
| EPHX2    | ENSG00000120915 | epoxide hydrolase 2, cytoplasmic [Source:HGNC Symbol;Acc:3402]                                                              | 1.36 | 9.4E-12 |
| --       | ENSG00000265393 | --                                                                                                                          | 2.15 | 9.5E-12 |
| TRUB2    | ENSG00000167112 | TruB pseudouridine (psi) synthase family member 2 [Source:HGNC                                                              | 1.08 | 9.7E-12 |
| GLB1L2   | ENSG00000149328 | Symbol;Acc:17170]<br>galactosidase, beta 1-like 2 [Source:HGNC Symbol;Acc:25129]                                            | 1.30 | 1.0E-11 |
| ACYP1    | ENSG00000119640 | acylphosphatase 1, erythrocyte (common) type [Source:HGNC                                                                   | 1.48 | 1.0E-11 |
| FARS2    | ENSG00000145982 | Symbol;Acc:179]<br>phenylalanyl-tRNA synthetase 2, mitochondrial [Source:HGNC                                               | 1.68 | 1.0E-11 |
| IFT80    | ENSG00000068885 | Symbol;Acc:21062]<br>intraflagellar transport 80 homolog (Chlamydomonas) [Source:HGNC                                       | 2.13 | 1.1E-11 |
| SCARA3   | ENSG00000168077 | Symbol;Acc:29262]<br>scavenger receptor class A, member 3 [Source:HGNC                                                      | 4.04 | 1.1E-11 |
| CCNI2    | ENSG00000205089 | Symbol;Acc:19000]<br>cyclin I family, member 2 [Source:HGNC Symbol;Acc:33869]                                               | 1.10 | 1.1E-11 |
| FAM216A  | ENSG00000204856 | family with sequence similarity 216, member A [Source:HGNC                                                                  | 2.58 | 1.2E-11 |
|          |                 | Symbol;Acc:30180]                                                                                                           |      |         |

|            |                 |                                                                                                           |      |         |
|------------|-----------------|-----------------------------------------------------------------------------------------------------------|------|---------|
| IFT74      | ENSG00000096872 | intraflagellar transport 74 homolog (Chlamydomonas) [Source:HGNC Symbol;Acc:21424]                        | 1.53 | 1.2E-11 |
| CHD6       | ENSG00000124177 | chromodomain helicase DNA binding protein 6 [Source:HGNC Symbol;Acc:19057]                                | 1.27 | 1.3E-11 |
| FAHD2B     | ENSG00000144199 | fumarylacetoacetate hydrolase domain containing 2B [Source:HGNC Symbol;Acc:25318]                         | 2.83 | 1.3E-11 |
| MANEAL     | ENSG00000185090 | mannosidase, endo-alpha-like [Source:HGNC Symbol;Acc:26452]                                               | 1.59 | 1.3E-11 |
| METTL13    | ENSG00000010165 | methyltransferase like 13 [Source:HGNC Symbol;Acc:24248]                                                  | 1.26 | 1.3E-11 |
| HDDC2      | ENSG00000111906 | HD domain containing 2 [Source:HGNC Symbol;Acc:21078]                                                     | 1.03 | 1.3E-11 |
| DDX18      | ENSG00000088205 | DEAD (Asp-Glu-Ala-Asp) box polypeptide 18 [Source:HGNC Symbol;Acc:2741]                                   | 1.37 | 1.3E-11 |
| RPS8       | ENSG00000142937 | ribosomal protein S8 [Source:HGNC Symbol;Acc:10441]                                                       | 1.12 | 1.4E-11 |
| ARL3       | ENSG00000138175 | ADP-ribosylation factor-like 3 [Source:HGNC Symbol;Acc:694]                                               | 1.57 | 1.5E-11 |
| NIF3L1     | ENSG00000196290 | NIF3 NGG1 interacting factor 3-like 1 ( <i>S. cerevisiae</i> ) [Source:HGNC Symbol;Acc:13390]             | 0.95 | 1.6E-11 |
| RPL27      | ENSG00000131469 | ribosomal protein L27 [Source:HGNC Symbol;Acc:10328]                                                      | 1.06 | 1.7E-11 |
| FAM211A-AS | ENSG00000175061 | FAM211A antisense RNA 1 [Source:HGNC Symbol;Acc:28619]                                                    | 1.05 | 1.7E-11 |
| FAM131B    | ENSG00000159784 | family with sequence similarity 131, member B [Source:HGNC Symbol;Acc:22202]                              | 1.80 | 1.7E-11 |
| IMPA2      | ENSG00000141401 | inositol(myo)-1(or 4)-monophosphatase 2 [Source:HGNC Symbol;Acc:6051]                                     | 1.67 | 1.7E-11 |
| EMC3-AS1   | ENSG00000180385 | EMC3 antisense RNA 1 [Source:HGNC Symbol;Acc:49223]                                                       | 2.11 | 1.7E-11 |
| DFFB       | ENSG00000169598 | DNA fragmentation factor, 40kDa, beta polypeptide (caspase-activated DNase) [Source:HGNC Symbol;Acc:2773] | 2.14 | 1.8E-11 |
| NAA16      | ENSG00000172766 | N(alpha)-acetyltransferase 16, NatA auxiliary subunit [Source:HGNC Symbol;Acc:26164]                      | 1.35 | 1.9E-11 |
| CLUAP1     | ENSG00000103351 | clusterin associated protein 1 [Source:HGNC Symbol;Acc:19009]                                             | 1.56 | 1.9E-11 |
| HDDC3      | ENSG00000184508 | HD domain containing 3 [Source:HGNC Symbol;Acc:30522]                                                     | 1.33 | 2.0E-11 |
| --         | ENSG00000247903 | --                                                                                                        | 2.13 | 2.0E-11 |

|         |                 |                                                                                                        |      |         |
|---------|-----------------|--------------------------------------------------------------------------------------------------------|------|---------|
| TTC26   | ENSG00000105948 | tetratricopeptide repeat domain 26 [Source:HGNC Symbol;Acc:21882]                                      | 2.07 | 2.0E-11 |
| NNT-AS1 | ENSG00000248092 | NNT antisense RNA 1 [Source:HGNC Symbol;Acc:49005]                                                     | 1.38 | 2.0E-11 |
| UMPS    | ENSG00000114491 | uridine monophosphate synthetase [Source:HGNC Symbol;Acc:12563]                                        | 0.95 | 2.1E-11 |
| GLA     | ENSG00000102393 | galactosidase, alpha [Source:HGNC Symbol;Acc:4296]                                                     | 0.90 | 2.1E-11 |
| PUS1    | ENSG00000177192 | pseudouridylate synthase 1 [Source:HGNC Symbol;Acc:15508]                                              | 1.63 | 2.1E-11 |
| GPAM    | ENSG00000119927 | glycerol-3-phosphate acyltransferase, mitochondrial [Source:HGNC Symbol;Acc:24865]                     | 1.63 | 2.2E-11 |
| GPR63   | ENSG00000112218 | G protein-coupled receptor 63 [Source:HGNC Symbol;Acc:13302]                                           | 3.82 | 2.3E-11 |
| PHB     | ENSG00000167085 | prohibitin [Source:HGNC Symbol;Acc:8912]                                                               | 1.15 | 2.5E-11 |
| DNAH14  | ENSG00000185842 | dynein, axonemal, heavy chain 14 [Source:HGNC Symbol;Acc:2945]                                         | 1.99 | 2.5E-11 |
| TMEM39B | ENSG00000121775 | transmembrane protein 39B [Source:HGNC Symbol;Acc:25510]                                               | 1.78 | 2.6E-11 |
| RNF20   | ENSG00000155827 | ring finger protein 20, E3 ubiquitin protein ligase [Source:HGNC Symbol;Acc:10062]                     | 1.29 | 2.7E-11 |
| PNPLA4  | ENSG00000006757 | patatin-like phospholipase domain containing 4 [Source:HGNC Symbol;Acc:24887]                          | 0.94 | 2.7E-11 |
| PCNXL2  | ENSG00000135749 | pecanex-like 2 (Drosophila) [Source:HGNC Symbol;Acc:8736]                                              | 1.23 | 2.8E-11 |
| SLBP    | ENSG00000163950 | stem-loop binding protein [Source:HGNC Symbol;Acc:10904]                                               | 1.09 | 2.8E-11 |
| CBX1    | ENSG00000108468 | chromobox homolog 1 [Source:HGNC Symbol;Acc:1551]                                                      | 1.28 | 2.9E-11 |
| CADPS   | ENSG00000163618 | Ca <sup>++</sup> -dependent secretion activator [Source:HGNC Symbol;Acc:1426]                          | 2.16 | 2.9E-11 |
| SYCP3   | ENSG00000139351 | synaptonemal complex protein 3 [Source:HGNC Symbol;Acc:18130]                                          | 1.21 | 3.2E-11 |
| KCNAB2  | ENSG00000069424 | potassium voltage-gated channel, shaker-related subfamily, beta member 2 [Source:HGNC Symbol;Acc:6229] | 1.68 | 3.4E-11 |
| IGFBP4  | ENSG00000141753 | insulin-like growth factor binding protein 4 [Source:HGNC Symbol;Acc:5473]                             | 1.20 | 3.4E-11 |
| MRPS2   | ENSG00000122140 | mitochondrial ribosomal protein S2 [Source:HGNC Symbol;Acc:14495]                                      | 1.44 | 3.6E-11 |

|         |                 |                                                                                                                      |      |         |
|---------|-----------------|----------------------------------------------------------------------------------------------------------------------|------|---------|
| NDUFA10 | ENSG00000130414 | NADH dehydrogenase (ubiquinone) 1 alpha subcomplex, 10, 42kDa [Source:HGNC Symbol;Acc:7684]                          | 0.80 | 3.6E-11 |
| CD8B    | ENSG00000172116 | CD8b molecule [Source:HGNC Symbol;Acc:1707]                                                                          | 1.51 | 3.7E-11 |
| --      | ENSG00000257337 | --                                                                                                                   | 0.89 | 3.8E-11 |
| SEH1L   | ENSG00000085415 | SEH1-like (S. cerevisiae) [Source:HGNC Symbol;Acc:30379]                                                             | 1.18 | 4.0E-11 |
| SNRPA   | ENSG00000077312 | small nuclear ribonucleoprotein polypeptide A [Source:HGNC Symbol;Acc:11151]                                         | 1.36 | 4.0E-11 |
| CCDC159 | ENSG00000183401 | coiled-coil domain containing 159 [Source:HGNC Symbol;Acc:26996]                                                     | 1.39 | 4.1E-11 |
| RCN2    | ENSG00000117906 | reticulocalbin 2, EF-hand calcium binding domain [Source:HGNC Symbol;Acc:9935]                                       | 1.50 | 4.2E-11 |
| ANAPC7  | ENSG00000196510 | anaphase promoting complex subunit 7 [Source:HGNC Symbol;Acc:17380]                                                  | 1.14 | 4.3E-11 |
| TTC21B  | ENSG00000123607 | tetratricopeptide repeat domain 21B [Source:HGNC Symbol;Acc:25660]                                                   | 1.40 | 4.3E-11 |
| IFT46   | ENSG00000118096 | intraflagellar transport 46 homolog (Chlamydomonas) [Source:HGNC Symbol;Acc:26146]                                   | 1.74 | 4.4E-11 |
| RRP9    | ENSG00000114767 | ribosomal RNA processing 9, small subunit (SSU) processome component, homolog (yeast) [Source:HGNC Symbol;Acc:16829] | 1.60 | 4.4E-11 |
| --      | ENSG00000269131 | --                                                                                                                   | 1.03 | 4.8E-11 |
| FBXO4   | ENSG00000151876 | F-box protein 4 [Source:HGNC Symbol;Acc:13583]                                                                       | 2.06 | 5.0E-11 |
| ARV1    | ENSG00000173409 | ARV1 homolog (S. cerevisiae) [Source:HGNC Symbol;Acc:29561]                                                          | 1.30 | 5.0E-11 |
| APTX    | ENSG00000137074 | aprataxin [Source:HGNC Symbol;Acc:15984]                                                                             | 0.96 | 5.1E-11 |
| --      | ENSG00000269534 | --                                                                                                                   | 2.73 | 5.2E-11 |
| CISD1   | ENSG00000122873 | CDGSH iron sulfur domain 1 [Source:HGNC Symbol;Acc:30880]                                                            | 1.47 | 5.2E-11 |
| ING5    | ENSG00000168395 | inhibitor of growth family, member 5 [Source:HGNC Symbol;Acc:19421]                                                  | 1.42 | 5.2E-11 |
| ZNF204P | ENSG00000204789 | zinc finger protein 204, pseudogene [Source:HGNC Symbol;Acc:12995]                                                   | 2.74 | 5.3E-11 |



|          |                 |                                                                                                          |      |         |
|----------|-----------------|----------------------------------------------------------------------------------------------------------|------|---------|
| NKD2     | ENSG00000145506 | naked cuticle homolog 2 (Drosophila) [Source:HGNC Symbol;Acc:17046]                                      | 2.76 | 5.4E-11 |
| PGAP2    | ENSG00000148985 | post-GPI attachment to proteins 2 [Source:HGNC Symbol;Acc:17893]                                         | 1.28 | 5.6E-11 |
| ICT1     | ENSG00000167862 | immature colon carcinoma transcript 1 [Source:HGNC Symbol;Acc:5359]                                      | 1.03 | 5.6E-11 |
| NMU      | ENSG00000109255 | neuromedin U [Source:HGNC Symbol;Acc:7859]                                                               | 1.76 | 5.6E-11 |
| GSTM4    | ENSG00000168765 | glutathione S-transferase mu 4 [Source:HGNC Symbol;Acc:4636]                                             | 1.55 | 5.7E-11 |
| RIPPLY3  | ENSG00000183145 | rippy transcriptional repressor 3 [Source:HGNC Symbol;Acc:3047]                                          | 4.33 | 5.8E-11 |
| SS18L2   | ENSG00000008324 | synovial sarcoma translocation gene on chromosome 18-like 2 [Source:HGNC Symbol;Acc:15593]               | 1.12 | 5.8E-11 |
| MTPAP    | ENSG00000107951 | mitochondrial poly(A) polymerase [Source:HGNC Symbol;Acc:25532]                                          | 1.17 | 5.8E-11 |
| SPATA33  | ENSG00000167523 | spermatogenesis associated 33 [Source:HGNC Symbol;Acc:26463]                                             | 1.32 | 5.8E-11 |
| RDM1     | ENSG00000187456 | RAD52 motif 1 [Source:HGNC Symbol;Acc:19950]                                                             | 4.34 | 6.0E-11 |
| --       | ENSG00000258378 | --                                                                                                       | 2.12 | 6.0E-11 |
| SRSF7    | ENSG00000115875 | serine/arginine-rich splicing factor 7 [Source:HGNC Symbol;Acc:10789]                                    | 0.86 | 6.1E-11 |
| TOR3A    | ENSG00000186283 | torsin family 3, member A [Source:HGNC Symbol;Acc:11997]                                                 | 1.20 | 6.2E-11 |
| ZNF775   | ENSG00000196456 | zinc finger protein 775 [Source:HGNC Symbol;Acc:28501]                                                   | 2.44 | 6.5E-11 |
| ESD      | ENSG00000139684 | esterase D [Source:HGNC Symbol;Acc:3465]                                                                 | 1.08 | 6.6E-11 |
| CCT6A    | ENSG00000146731 | chaperonin containing TCP1, subunit 6A (zeta 1) [Source:HGNC Symbol;Acc:1620]                            | 0.94 | 6.6E-11 |
| --       | ENSG00000253161 | --                                                                                                       | 2.72 | 6.7E-11 |
| CD320    | ENSG00000167775 | CD320 molecule [Source:HGNC Symbol;Acc:16692]                                                            | 1.44 | 6.9E-11 |
| UBR7     | ENSG00000012963 | ubiquitin protein ligase E3 component n-recognin 7 (putative) [Source:HGNC Symbol;Acc:20344]             | 1.03 | 6.9E-11 |
| PDCD2L   | ENSG00000126249 | programmed cell death 2-like [Source:HGNC Symbol;Acc:28194]                                              | 1.86 | 7.1E-11 |
| NUDT16P1 | ENSG00000246082 | nudix (nucleoside diphosphate linked moiety X)-type motif 16 pseudogene 1 [Source:HGNC Symbol;Acc:27189] | 1.42 | 7.2E-11 |

|           |                 |                                                                                           |      |         |
|-----------|-----------------|-------------------------------------------------------------------------------------------|------|---------|
| EIF3F     | ENSG00000175390 | eukaryotic translation initiation factor 3, subunit F [Source:HGNC Symbol;Acc:3275]       | 0.78 | 7.2E-11 |
| TRMT12    | ENSG00000183665 | tRNA methyltransferase 12 homolog ( <i>S. cerevisiae</i> ) [Source:HGNC Symbol;Acc:26091] | 1.27 | 7.3E-11 |
| C3orf33   | ENSG00000174928 | chromosome 3 open reading frame 33 [Source:HGNC Symbol;Acc:26434]                         | 1.72 | 7.3E-11 |
| TARS2     | ENSG00000143374 | threonyl-tRNA synthetase 2, mitochondrial (putative) [Source:HGNC Symbol;Acc:30740]       | 1.13 | 7.3E-11 |
| NSUN5P1   | ENSG00000223705 | NOP2/Sun domain family, member 5 pseudogene 1 [Source:HGNC Symbol;Acc:19146]              | 1.15 | 7.4E-11 |
| CIRH1A    | ENSG00000141076 | cirrhosis, autosomal recessive 1A (cirhin) [Source:HGNC Symbol;Acc:1983]                  | 1.33 | 7.8E-11 |
| MRPL36    | ENSG00000171421 | mitochondrial ribosomal protein L36 [Source:HGNC Symbol;Acc:14490]                        | 1.19 | 7.8E-11 |
| NOL11     | ENSG00000130935 | nucleolar protein 11 [Source:HGNC Symbol;Acc:24557]                                       | 1.25 | 7.9E-11 |
| BYSL      | ENSG00000112578 | bystin-like [Source:HGNC Symbol;Acc:1157]                                                 | 1.44 | 8.0E-11 |
| ZC3HC1    | ENSG00000091732 | zinc finger, C3HC-type containing 1 [Source:HGNC Symbol;Acc:29913]                        | 1.57 | 8.0E-11 |
| ZNF90     | ENSG00000213988 | zinc finger protein 90 [Source:HGNC Symbol;Acc:13165]                                     | 2.26 | 8.1E-11 |
| ZNF22     | ENSG00000165512 | zinc finger protein 22 [Source:HGNC Symbol;Acc:13012]                                     | 1.53 | 8.4E-11 |
| DPH6      | ENSG00000134146 | diphthamine biosynthesis 6 [Source:HGNC Symbol;Acc:30543]                                 | 1.41 | 8.5E-11 |
| LINC00888 | ENSG00000240024 | long intergenic non-protein coding RNA 888 [Source:HGNC Symbol;Acc:48575]                 | 2.14 | 8.7E-11 |
| --        | ENSG00000266642 | --                                                                                        | 1.97 | 9.0E-11 |
| GRPEL2    | ENSG00000164284 | GrpE-like 2, mitochondrial ( <i>E. coli</i> ) [Source:HGNC Symbol;Acc:21060]              | 1.24 | 9.0E-11 |
| FAF1      | ENSG00000185104 | Fas (TNFRSF6) associated factor 1 [Source:HGNC Symbol;Acc:3578]                           | 1.02 | 9.4E-11 |
| CCDC138   | ENSG00000163006 | coiled-coil domain containing 138 [Source:HGNC Symbol;Acc:26531]                          | 2.17 | 9.5E-11 |
| SURF6     | ENSG00000148296 | surfeit 6 [Source:HGNC Symbol;Acc:11478]                                                  | 1.29 | 9.8E-11 |
| GMPS      | ENSG00000163655 | guanine monophosphate synthase [Source:HGNC Symbol;Acc:4378]                              | 1.12 | 9.9E-11 |

|              |                 |                                                                                                                 |      |         |
|--------------|-----------------|-----------------------------------------------------------------------------------------------------------------|------|---------|
| CMTM8        | ENSG00000170293 | CKLF-like MARVEL transmembrane domain containing 8 [Source:HGNC Symbol;Acc:19179]                               | 1.20 | 1.0E-10 |
| THEM4        | ENSG00000159445 | thioesterase superfamily member 4 [Source:HGNC Symbol;Acc:17947]                                                | 1.19 | 1.0E-10 |
| ARHGEF19     | ENSG00000142632 | Rho guanine nucleotide exchange factor (GEF) 19 [Source:HGNC Symbol;Acc:26604]                                  | 1.50 | 1.0E-10 |
| --           | ENSG00000270605 | --                                                                                                              | 2.14 | 1.1E-10 |
| SNHG8        | ENSG00000269893 | small nucleolar RNA host gene 8 (non-protein coding) [Source:HGNC Symbol;Acc:33098]                             | 1.25 | 1.1E-10 |
| CEP192       | ENSG00000101639 | centrosomal protein 192kDa [Source:HGNC Symbol;Acc:25515]                                                       | 1.18 | 1.1E-10 |
| HNRNPA1L2    | ENSG00000139675 | heterogeneous nuclear ribonucleoprotein A1-like 2 [Source:HGNC Symbol;Acc:27067]                                | 2.15 | 1.1E-10 |
| CTPS1        | ENSG00000171793 | CTP synthase 1 [Source:HGNC Symbol;Acc:2519]                                                                    | 1.27 | 1.1E-10 |
| TAF15        | ENSG00000172660 | TAF15 RNA polymerase II, TATA box binding protein (TBP)-associated factor, 68kDa [Source:HGNC Symbol;Acc:11547] | 0.86 | 1.2E-10 |
| CREB3L4      | ENSG00000143578 | cAMP responsive element binding protein 3-like 4 [Source:HGNC Symbol;Acc:18854]                                 | 1.84 | 1.2E-10 |
| C6orf57      | ENSG00000154079 | chromosome 6 open reading frame 57 [Source:HGNC Symbol;Acc:20957]                                               | 1.50 | 1.2E-10 |
| EPB41L4A-AS1 | ENSG00000224032 | EPB41L4A antisense RNA 1 [Source:HGNC Symbol;Acc:30749]                                                         | 1.56 | 1.2E-10 |
| GLIS3        | ENSG00000107249 | GLIS family zinc finger 3 [Source:HGNC Symbol;Acc:28510]                                                        | 1.28 | 1.3E-10 |
| POLR2D       | ENSG00000144231 | polymerase (RNA) II (DNA directed) polypeptide D [Source:HGNC Symbol;Acc:9191]                                  | 1.10 | 1.3E-10 |
| RPF2         | ENSG00000197498 | ribosome production factor 2 homolog ( <i>S. cerevisiae</i> ) [Source:HGNC Symbol;Acc:20870]                    | 1.21 | 1.4E-10 |
| NCKAP5L      | ENSG00000167566 | NCK-associated protein 5-like [Source:HGNC Symbol;Acc:29321]                                                    | 1.92 | 1.4E-10 |
| CEP57        | ENSG00000166037 | centrosomal protein 57kDa [Source:HGNC Symbol;Acc:30794]                                                        | 1.36 | 1.4E-10 |
| MTHFD1L      | ENSG00000120254 | methylenetetrahydrofolate dehydrogenase (NADP+ dependent) 1-like [Source:HGNC Symbol;Acc:21055]                 | 1.49 | 1.4E-10 |

|           |                 |                                                                   |      |         |
|-----------|-----------------|-------------------------------------------------------------------|------|---------|
| ZNF330    | ENSG00000109445 | zinc finger protein 330 [Source:HGNC Symbol;Acc:15462]            | 1.03 | 1.4E-10 |
|           |                 | natural killer cell cytotoxicity receptor 3 ligand 1 [Source:HGNC |      |         |
| NCR3LG1   | ENSG00000188211 | Symbol;Acc:42400]                                                 | 1.72 | 1.5E-10 |
| --        | ENSG00000259049 | --                                                                | 1.02 | 1.5E-10 |
| --        | ENSG00000253716 | --                                                                | 1.80 | 1.5E-10 |
|           |                 | Uncharacterized protein C2orf15 [Source:UniProtKB/Swiss-          |      |         |
| --        | ENSG00000273045 | Prot;Acc:Q8WU43]                                                  | 2.38 | 1.5E-10 |
| --        | ENSG00000260822 | --                                                                | 1.60 | 1.5E-10 |
| --        | ENSG00000254343 | --                                                                | 4.08 | 1.5E-10 |
| MCF2L-AS1 | ENSG00000235280 | MCF2L antisense RNA 1 [Source:HGNC Symbol;Acc:39825]              | 3.40 | 1.6E-10 |
|           |                 | alkB, alkylation repair homolog 8 (E. coli) [Source:HGNC          |      |         |
| ALKBH8    | ENSG00000137760 | Symbol;Acc:25189]                                                 | 1.59 | 1.7E-10 |
|           |                 | mitochondrial ribosomal protein L13 [Source:HGNC                  |      |         |
| MRPL13    | ENSG00000172172 | Symbol;Acc:14278]                                                 | 1.08 | 1.7E-10 |
| --        | ENSG00000231851 | --                                                                | 1.46 | 1.7E-10 |
| GKAP1     | ENSG00000165113 | G kinase anchoring protein 1 [Source:HGNC Symbol;Acc:17496]       | 2.31 | 1.8E-10 |
|           |                 | MCF.2 cell line derived transforming sequence-like [Source:HGNC   |      |         |
| MCF2L     | ENSG00000126217 | Symbol;Acc:14576]                                                 | 1.69 | 1.8E-10 |
|           |                 | clustered mitochondria (cluA/CLU1) homolog [Source:HGNC           |      |         |
| CLUH      | ENSG00000132361 | Symbol;Acc:29094]                                                 | 1.55 | 1.8E-10 |
|           |                 | DEAD (Asp-Glu-Ala-Asp) box polypeptide 28 [Source:HGNC            |      |         |
| DDX28     | ENSG00000182810 | Symbol;Acc:17330]                                                 | 1.44 | 1.9E-10 |
|           |                 | chromosome 1 open reading frame 112 [Source:HGNC                  |      |         |
| C1orf112  | ENSG00000000460 | Symbol;Acc:25565]                                                 | 0.97 | 1.9E-10 |
| --        | ENSG00000267321 | --                                                                | 2.04 | 1.9E-10 |
|           |                 | chromosome 2 open reading frame 44 [Source:HGNC                   |      |         |
| C2orf44   | ENSG00000163026 | Symbol;Acc:26157]                                                 | 1.69 | 2.0E-10 |
| --        | ENSG00000225241 | --                                                                | 1.69 | 2.0E-10 |
| ZNF48     | ENSG00000180035 | zinc finger protein 48 [Source:HGNC Symbol;Acc:13114]             | 1.26 | 2.0E-10 |

|         |                 |                                                                                                                                                    |      |         |
|---------|-----------------|----------------------------------------------------------------------------------------------------------------------------------------------------|------|---------|
| SMIM4   | ENSG00000168273 | small integral membrane protein 4 [Source:HGNC Symbol;Acc:37257]<br>processing of precursor 1, ribonuclease P/MRP subunit ( <i>S. cerevisiae</i> ) | 1.35 | 2.1E-10 |
| POP1    | ENSG00000104356 | [Source:HGNC Symbol;Acc:30129]<br>AT rich interactive domain 5B (MRF1-like) [Source:HGNC                                                           | 1.18 | 2.1E-10 |
| ARID5B  | ENSG00000150347 | Symbol;Acc:17362]<br>cytochrome P450, family 2, subfamily U, polypeptide 1 [Source:HGNC                                                            | 1.97 | 2.1E-10 |
| CYP2U1  | ENSG00000155016 | Symbol;Acc:20582]                                                                                                                                  | 3.16 | 2.2E-10 |
| USP36   | ENSG00000055483 | ubiquitin specific peptidase 36 [Source:HGNC Symbol;Acc:20062]<br>tryptophanyl tRNA synthetase 2, mitochondrial [Source:HGNC                       | 1.20 | 2.3E-10 |
| WARS2   | ENSG00000116874 | Symbol;Acc:12730]                                                                                                                                  | 1.14 | 2.3E-10 |
| LRRC45  | ENSG00000169683 | leucine rich repeat containing 45 [Source:HGNC Symbol;Acc:28302]                                                                                   | 1.56 | 2.3E-10 |
| --      | ENSG00000235560 | --                                                                                                                                                 | 1.98 | 2.3E-10 |
| --      | ENSG00000204872 | --                                                                                                                                                 | 2.37 | 2.4E-10 |
| MRPS23  | ENSG00000181610 | mitochondrial ribosomal protein S23 [Source:HGNC<br>Symbol;Acc:14509]                                                                              | 1.20 | 2.4E-10 |
| SSBP1   | ENSG00000106028 | single-stranded DNA binding protein 1, mitochondrial [Source:HGNC<br>Symbol;Acc:11317]                                                             | 0.83 | 2.4E-10 |
| DZIP3   | ENSG00000198919 | DAZ interacting zinc finger protein 3 [Source:HGNC<br>Symbol;Acc:30938]                                                                            | 1.78 | 2.4E-10 |
| RHOBTB3 | ENSG00000164292 | Rho-related BTB domain containing 3 [Source:HGNC<br>Symbol;Acc:18757]                                                                              | 1.18 | 2.6E-10 |
| TRIM65  | ENSG00000141569 | tripartite motif containing 65 [Source:HGNC Symbol;Acc:27316]<br>dual-specificity tyrosine-(Y)-phosphorylation regulated kinase 4                  | 1.02 | 2.7E-10 |
| DYRK4   | ENSG00000010219 | [Source:HGNC Symbol;Acc:3095]<br>centriole, cilia and spindle-associated protein [Source:HGNC                                                      | 1.48 | 2.7E-10 |
| CCSAP   | ENSG00000154429 | Symbol;Acc:29578]<br>RAB40B, member RAS oncogene family [Source:HGNC                                                                               | 1.53 | 2.8E-10 |
| RAB40B  | ENSG00000141542 | Symbol;Acc:18284]                                                                                                                                  | 0.96 | 2.8E-10 |
| RPL14   | ENSG00000188846 | ribosomal protein L14 [Source:HGNC Symbol;Acc:10305]                                                                                               | 1.10 | 2.9E-10 |

|          |                 |                                                                                     |      |         |
|----------|-----------------|-------------------------------------------------------------------------------------|------|---------|
| RPS20    | ENSG00000008988 | ribosomal protein S20 [Source:HGNC Symbol;Acc:10405]                                | 1.13 | 2.9E-10 |
| ORC5     | ENSG00000164815 | origin recognition complex, subunit 5 [Source:HGNC Symbol;Acc:8491]                 | 1.14 | 2.9E-10 |
| SHQ1     | ENSG00000144736 | SHQ1, H/ACA ribonucleoprotein assembly factor [Source:HGNC Symbol;Acc:25543]        | 1.23 | 3.0E-10 |
| --       | ENSG00000255959 | --                                                                                  | 1.75 | 3.0E-10 |
| PYURF    | ENSG00000145337 | PIGY upstream reading frame [Source:HGNC Symbol;Acc:44317]                          | 1.13 | 3.0E-10 |
| MKS1     | ENSG00000011143 | Meckel syndrome, type 1 [Source:HGNC Symbol;Acc:7121]                               | 1.23 | 3.0E-10 |
| RPL31    | ENSG00000071082 | ribosomal protein L31 [Source:HGNC Symbol;Acc:10334]                                | 0.96 | 3.0E-10 |
| DMRTA2   | ENSG00000142700 | DMRT-like family A2 [Source:HGNC Symbol;Acc:13908]                                  | 3.01 | 3.1E-10 |
| RANBP17  | ENSG00000204764 | RAN binding protein 17 [Source:HGNC Symbol;Acc:14428]                               | 1.50 | 3.1E-10 |
| EFTUD2   | ENSG00000108883 | elongation factor Tu GTP binding domain containing 2 [Source:HGNC Symbol;Acc:30858] | 0.87 | 3.2E-10 |
| C9orf142 | ENSG00000148362 | chromosome 9 open reading frame 142 [Source:HGNC Symbol;Acc:27849]                  | 2.17 | 3.2E-10 |
| ZNF275   | ENSG00000063587 | zinc finger protein 275 [Source:HGNC Symbol;Acc:13069]                              | 1.36 | 3.3E-10 |
| CBR4     | ENSG00000145439 | carbonyl reductase 4 [Source:HGNC Symbol;Acc:25891]                                 | 1.05 | 3.3E-10 |
| RPS13    | ENSG00000110700 | ribosomal protein S13 [Source:HGNC Symbol;Acc:10386]                                | 1.01 | 3.3E-10 |
| TMEM192  | ENSG00000170088 | transmembrane protein 192 [Source:HGNC Symbol;Acc:26775]                            | 1.59 | 3.5E-10 |
| ARL14EP  | ENSG00000152219 | ADP-ribosylation factor-like 14 effector protein [Source:HGNC Symbol;Acc:26798]     | 1.27 | 3.6E-10 |
| --       | ENSG00000272189 | --                                                                                  | 1.86 | 3.8E-10 |
| LPAR6    | ENSG00000139679 | lysophosphatidic acid receptor 6 [Source:HGNC Symbol;Acc:15520]                     | 2.45 | 3.8E-10 |
| SAC3D1   | ENSG00000168061 | SAC3 domain containing 1 [Source:HGNC Symbol;Acc:30179]                             | 1.60 | 3.9E-10 |
| RCC1     | ENSG00000180198 | regulator of chromosome condensation 1 [Source:HGNC Symbol;Acc:1913]                | 0.90 | 3.9E-10 |
| BANF1    | ENSG00000175334 | barrier to autointegration factor 1 [Source:HGNC Symbol;Acc:17397]                  | 1.05 | 4.0E-10 |
| GNPNAT1  | ENSG00000100522 | glucosamine-phosphate N-acetyltransferase 1 [Source:HGNC Symbol;Acc:19980]          | 1.11 | 4.0E-10 |

|           |                 |                                                                                               |      |         |
|-----------|-----------------|-----------------------------------------------------------------------------------------------|------|---------|
| ZBED3     | ENSG00000132846 | zinc finger, BED-type containing 3 [Source:HGNC Symbol;Acc:20711]                             | 1.47 | 4.1E-10 |
| TMEM67    | ENSG00000164953 | transmembrane protein 67 [Source:HGNC Symbol;Acc:28396]                                       | 1.87 | 4.1E-10 |
| GTPBP4    | ENSG00000107937 | GTP binding protein 4 [Source:HGNC Symbol;Acc:21535]                                          | 0.91 | 4.1E-10 |
| CSPP1     | ENSG00000104218 | centrosome and spindle pole associated protein 1 [Source:HGNC Symbol;Acc:26193]               | 1.32 | 4.2E-10 |
| ECSIT     | ENSG00000130159 | ECSIT signalling integrator [Source:HGNC Symbol;Acc:29548]                                    | 1.49 | 4.2E-10 |
| TTC8      | ENSG00000165533 | tetratricopeptide repeat domain 8 [Source:HGNC Symbol;Acc:20087]                              | 1.62 | 4.3E-10 |
| NSA2      | ENSG00000164346 | NSA2 ribosome biogenesis homolog ( <i>S. cerevisiae</i> ) [Source:HGNC Symbol;Acc:30728]      | 1.15 | 4.3E-10 |
| ACADM     | ENSG00000117054 | acyl-CoA dehydrogenase, C-4 to C-12 straight chain [Source:HGNC Symbol;Acc:89]                | 1.53 | 4.3E-10 |
| ERMER34-1 | ENSG00000226887 | endogenous retrovirus group MER34, member 1 [Source:HGNC Symbol;Acc:42970]                    | 2.59 | 4.4E-10 |
| RAB26     | ENSG00000167964 | RAB26, member RAS oncogene family [Source:HGNC Symbol;Acc:14259]                              | 2.04 | 4.4E-10 |
| AARS2     | ENSG00000124608 | alanyl-tRNA synthetase 2, mitochondrial [Source:HGNC Symbol;Acc:21022]                        | 1.51 | 4.6E-10 |
| RPS7      | ENSG00000171863 | ribosomal protein S7 [Source:HGNC Symbol;Acc:10440]                                           | 1.03 | 4.6E-10 |
| CPVL      | ENSG00000106066 | carboxypeptidase, vitellogenic-like [Source:HGNC Symbol;Acc:14399]                            | 1.35 | 4.6E-10 |
| HOXA9     | ENSG00000078399 | homeobox A9 [Source:HGNC Symbol;Acc:5109]                                                     | 1.34 | 4.7E-10 |
| UTP18     | ENSG00000011260 | UTP18 small subunit (SSU) processome component homolog (yeast) [Source:HGNC Symbol;Acc:24274] | 1.13 | 4.7E-10 |
| --        | ENSG00000261188 | --                                                                                            | 2.19 | 4.8E-10 |
| RPL35A    | ENSG00000182899 | ribosomal protein L35a [Source:HGNC Symbol;Acc:10345]                                         | 0.99 | 5.0E-10 |
| DHRS13    | ENSG00000167536 | dehydrogenase/reductase (SDR family) member 13 [Source:HGNC Symbol;Acc:28326]                 | 1.93 | 5.0E-10 |
| RPGRIP1L  | ENSG00000103494 | RPGRIP1-like [Source:HGNC Symbol;Acc:29168]                                                   | 1.74 | 5.1E-10 |
| GPALPP1   | ENSG00000133114 | GPALPP motifs containing 1 [Source:HGNC Symbol;Acc:20298]                                     | 1.10 | 5.2E-10 |

|          |                 |                                                                                                       |      |         |
|----------|-----------------|-------------------------------------------------------------------------------------------------------|------|---------|
| C21orf33 | ENSG00000160221 | chromosome 21 open reading frame 33 [Source:HGNC Symbol;Acc:1273]                                     | 0.96 | 5.3E-10 |
| DHODH    | ENSG00000102967 | dihydroorotate dehydrogenase (quinone) [Source:HGNC Symbol;Acc:2867]                                  | 2.37 | 5.4E-10 |
| LSG1     | ENSG00000041802 | large 60S subunit nuclear export GTPase 1 [Source:HGNC Symbol;Acc:25652]                              | 0.94 | 5.5E-10 |
| ATP6V0A2 | ENSG00000185344 | ATPase, H <sup>+</sup> transporting, lysosomal V0 subunit a2 [Source:HGNC Symbol;Acc:18481]           | 1.05 | 5.5E-10 |
| SPTSSB   | ENSG00000196542 | serine palmitoyltransferase, small subunit B [Source:HGNC Symbol;Acc:24045]                           | 1.48 | 5.5E-10 |
| DDX19A   | ENSG00000168872 | DEAD (Asp-Glu-Ala-Asp) box polypeptide 19A [Source:HGNC Symbol;Acc:25628]                             | 1.13 | 5.6E-10 |
| TOMM7    | ENSG00000196683 | translocase of outer mitochondrial membrane 7 homolog (yeast) [Source:HGNC Symbol;Acc:21648]          | 0.92 | 5.8E-10 |
| --       | ENSG00000272910 | --                                                                                                    | 1.23 | 6.0E-10 |
| SRM      | ENSG00000116649 | spermidine synthase [Source:HGNC Symbol;Acc:11296]                                                    | 1.89 | 6.1E-10 |
| ZNF248   | ENSG00000198105 | zinc finger protein 248 [Source:HGNC Symbol;Acc:13041]                                                | 1.39 | 6.2E-10 |
| HSD17B10 | ENSG00000072506 | hydroxysteroid (17-beta) dehydrogenase 10 [Source:HGNC Symbol;Acc:4800]                               | 1.18 | 6.5E-10 |
| CD27-AS1 | ENSG00000215039 | CD27 antisense RNA 1 [Source:HGNC Symbol;Acc:43896]                                                   | 1.11 | 6.5E-10 |
| MAD2L2   | ENSG00000116670 | MAD2 mitotic arrest deficient-like 2 (yeast) [Source:HGNC Symbol;Acc:6764]                            | 1.88 | 6.5E-10 |
| VMA21    | ENSG00000160131 | VMA21 vacuolar H <sup>+</sup> -ATPase homolog ( <i>S. cerevisiae</i> ) [Source:HGNC Symbol;Acc:22082] | 1.00 | 6.5E-10 |
| LIMK2    | ENSG00000182541 | LIM domain kinase 2 [Source:HGNC Symbol;Acc:6614]                                                     | 1.06 | 6.5E-10 |
| MRPS18B  | ENSG00000204568 | mitochondrial ribosomal protein S18B [Source:HGNC Symbol;Acc:14516]                                   | 0.86 | 6.6E-10 |
| NOL10    | ENSG00000115761 | nucleolar protein 10 [Source:HGNC Symbol;Acc:25862]                                                   | 1.21 | 6.8E-10 |
| COL9A3   | ENSG00000092758 | collagen, type IX, alpha 3 [Source:HGNC Symbol;Acc:2219]                                              | 1.97 | 6.8E-10 |



|            |                 |                                                                                        |      |         |
|------------|-----------------|----------------------------------------------------------------------------------------|------|---------|
| FMNL3      | ENSG00000161791 | formin-like 3 [Source:HGNC Symbol;Acc:23698]                                           | 1.63 | 6.8E-10 |
| CNTNAP2    | ENSG00000174469 | contactin associated protein-like 2 [Source:HGNC Symbol;Acc:13830]                     | 1.70 | 6.9E-10 |
| MINPP1     | ENSG00000107789 | multiple inositol-polyphosphate phosphatase 1 [Source:HGNC Symbol;Acc:7102]            | 1.24 | 7.0E-10 |
| CDKN2AIPNL | ENSG00000237190 | CDKN2A interacting protein N-terminal like [Source:HGNC Symbol;Acc:30545]              | 1.14 | 7.1E-10 |
| MRPL32     | ENSG00000106591 | mitochondrial ribosomal protein L32 [Source:HGNC Symbol;Acc:14035]                     | 0.94 | 7.2E-10 |
| AGO1       | ENSG00000092847 | argonaute RISC catalytic component 1 [Source:HGNC Symbol;Acc:3262]                     | 1.05 | 7.3E-10 |
| --         | ENSG00000257742 | --                                                                                     | 1.68 | 7.4E-10 |
| --         | ENSG00000260874 | --                                                                                     | 2.15 | 7.5E-10 |
| COPG2      | ENSG00000158623 | coatamer protein complex, subunit gamma 2 [Source:HGNC Symbol;Acc:2237]                | 1.24 | 7.8E-10 |
| --         | ENSG00000250615 | --                                                                                     | 1.59 | 7.9E-10 |
| AIFM3      | ENSG00000183773 | apoptosis-inducing factor, mitochondrion-associated, 3 [Source:HGNC Symbol;Acc:26398]  | 1.64 | 8.0E-10 |
| RYR2       | ENSG00000198626 | ryanodine receptor 2 (cardiac) [Source:HGNC Symbol;Acc:10484]                          | 2.35 | 8.0E-10 |
| EPHB3      | ENSG00000182580 | EPH receptor B3 [Source:HGNC Symbol;Acc:3394]                                          | 1.95 | 8.3E-10 |
| TSPYL4     | ENSG00000187189 | TSPY-like 4 [Source:HGNC Symbol;Acc:21559]                                             | 1.25 | 8.3E-10 |
| DHX40      | ENSG00000108406 | DEAH (Asp-Glu-Ala-His) box polypeptide 40 [Source:HGNC Symbol;Acc:18018]               | 1.17 | 8.3E-10 |
| GPRC5B     | ENSG00000167191 | G protein-coupled receptor, family C, group 5, member B [Source:HGNC Symbol;Acc:13308] | 1.30 | 8.7E-10 |
| DSN1       | ENSG00000149636 | DSN1, MIS12 kinetochore complex component [Source:HGNC Symbol;Acc:16165]               | 0.95 | 8.7E-10 |
| PHKA2      | ENSG00000044446 | phosphorylase kinase, alpha 2 (liver) [Source:HGNC Symbol;Acc:8926]                    | 1.46 | 8.8E-10 |

|            |                 |                                                                                              |      |         |
|------------|-----------------|----------------------------------------------------------------------------------------------|------|---------|
| TRMT61B    | ENSG00000171103 | tRNA methyltransferase 61 homolog B ( <i>S. cerevisiae</i> ) [Source:HGNC Symbol;Acc:26070]  | 1.46 | 8.9E-10 |
| RETNLB     | ENSG00000163515 | resistin like beta [Source:HGNC Symbol;Acc:20388]                                            | 4.14 | 9.2E-10 |
| COPRS      | ENSG00000172301 | coordinator of PRMT5, differentiation stimulator [Source:HGNC Symbol;Acc:28848]              | 1.18 | 9.3E-10 |
| GRB14      | ENSG00000115290 | growth factor receptor-bound protein 14 [Source:HGNC Symbol;Acc:4565]                        | 2.63 | 9.4E-10 |
| SUV39H1    | ENSG00000101945 | suppressor of variegation 3-9 homolog 1 ( <i>Drosophila</i> ) [Source:HGNC Symbol;Acc:11479] | 1.18 | 9.5E-10 |
| NOP14      | ENSG00000087269 | NOP14 nucleolar protein [Source:HGNC Symbol;Acc:16821]                                       | 1.08 | 9.6E-10 |
| ISOC2      | ENSG00000063241 | isochorismatase domain containing 2 [Source:HGNC Symbol;Acc:26278]                           | 1.52 | 9.6E-10 |
| B3GNT1     | ENSG00000174684 | UDP-GlcNAc:betaGal beta-1,3-N-acetylglucosaminyltransferase 1 [Source:HGNC Symbol;Acc:15685] | 1.15 | 9.9E-10 |
| TRMT61A    | ENSG00000166166 | tRNA methyltransferase 61 homolog A ( <i>S. cerevisiae</i> ) [Source:HGNC Symbol;Acc:23790]  | 1.76 | 1.0E-09 |
| FAM72D     | ENSG00000215784 | family with sequence similarity 72, member D [Source:HGNC Symbol;Acc:33593]                  | 3.78 | 1.0E-09 |
| PRKAG2-AS1 | ENSG00000239911 | PRKAG2 antisense RNA 1 [Source:HGNC Symbol;Acc:40468]                                        | 4.36 | 1.0E-09 |
| --         | ENSG00000256364 | --                                                                                           | 1.96 | 1.0E-09 |
| CYB5RL     | ENSG00000215883 | cytochrome b5 reductase-like [Source:HGNC Symbol;Acc:32220]                                  | 3.16 | 1.1E-09 |
| TBC1D16    | ENSG00000167291 | TBC1 domain family, member 16 [Source:HGNC Symbol;Acc:28356]                                 | 1.08 | 1.1E-09 |
| --         | ENSG00000247796 | --                                                                                           | 3.07 | 1.1E-09 |
| HNRNPC     | ENSG00000092199 | heterogeneous nuclear ribonucleoprotein C (C1/C2) [Source:HGNC Symbol;Acc:5035]              | 0.83 | 1.1E-09 |
| --         | ENSG00000255135 | --                                                                                           | 2.36 | 1.1E-09 |
| CTTNBP2    | ENSG00000077063 | cortactin binding protein 2 [Source:HGNC Symbol;Acc:15679]                                   | 2.41 | 1.2E-09 |
| RPL7L1     | ENSG00000146223 | ribosomal protein L7-like 1 [Source:HGNC Symbol;Acc:21370]                                   | 0.90 | 1.2E-09 |
| --         | ENSG00000235257 | --                                                                                           | 1.82 | 1.2E-09 |

|           |                 |                                                                                                                        |      |         |
|-----------|-----------------|------------------------------------------------------------------------------------------------------------------------|------|---------|
| ANAPC15   | ENSG00000110200 | anaphase promoting complex subunit 15 [Source:HGNC Symbol;Acc:24531]                                                   | 1.06 | 1.2E-09 |
| C14orf142 | ENSG00000170270 | chromosome 14 open reading frame 142 [Source:HGNC Symbol;Acc:20356]                                                    | 1.34 | 1.2E-09 |
| LRRC34    | ENSG00000171757 | leucine rich repeat containing 34 [Source:HGNC Symbol;Acc:28408]                                                       | 2.58 | 1.2E-09 |
| ZNF670    | ENSG00000135747 | zinc finger protein 670 [Source:HGNC Symbol;Acc:28167]                                                                 | 1.51 | 1.2E-09 |
| CCNE2     | ENSG00000175305 | cyclin E2 [Source:HGNC Symbol;Acc:1590]                                                                                | 1.18 | 1.3E-09 |
| ELP2      | ENSG00000134759 | elongator acetyltransferase complex subunit 2 [Source:HGNC Symbol;Acc:18248]                                           | 0.93 | 1.3E-09 |
| ILF3-AS1  | ENSG00000267100 | ILF3 antisense RNA 1 (head to head) [Source:HGNC Symbol;Acc:27115]                                                     | 1.46 | 1.3E-09 |
| MRPS17    | ENSG00000239789 | mitochondrial ribosomal protein S17 [Source:HGNC Symbol;Acc:14047]                                                     | 1.81 | 1.3E-09 |
| ITGAE     | ENSG00000083457 | integrin, alpha E (antigen CD103, human mucosal lymphocyte antigen 1; alpha polypeptide) [Source:HGNC Symbol;Acc:6147] | 1.41 | 1.3E-09 |
| SLC19A3   | ENSG00000135917 | solute carrier family 19 (thiamine transporter), member 3 [Source:HGNC Symbol;Acc:16266]                               | 3.84 | 1.3E-09 |
| TFRC      | ENSG00000072274 | transferrin receptor [Source:HGNC Symbol;Acc:11763]                                                                    | 1.12 | 1.4E-09 |
| DDX56     | ENSG00000136271 | DEAD (Asp-Glu-Ala-Asp) box helicase 56 [Source:HGNC Symbol;Acc:18193]                                                  | 0.87 | 1.4E-09 |
| --        | ENSG00000256813 | --                                                                                                                     | 1.79 | 1.4E-09 |
| RRP12     | ENSG00000052749 | ribosomal RNA processing 12 homolog ( <i>S. cerevisiae</i> ) [Source:HGNC Symbol;Acc:29100]                            | 1.51 | 1.4E-09 |
| EPB41L4A  | ENSG00000129595 | erythrocyte membrane protein band 4.1 like 4A [Source:HGNC Symbol;Acc:13278]                                           | 1.90 | 1.5E-09 |
| MIR17HG   | ENSG00000215417 | miR-17-92 cluster host gene (non-protein coding) [Source:HGNC Symbol;Acc:23564]                                        | 1.62 | 1.5E-09 |
| RPS18     | ENSG00000231500 | ribosomal protein S18 [Source:HGNC Symbol;Acc:10401]                                                                   | 1.13 | 1.5E-09 |

|            |                 |                                                                                             |      |         |
|------------|-----------------|---------------------------------------------------------------------------------------------|------|---------|
| BZRAP1     | ENSG00000005379 | benzodiazepine receptor (peripheral) associated protein 1<br>[Source:HGNC Symbol;Acc:16831] | 3.10 | 1.5E-09 |
| --         | ENSG00000272335 | --                                                                                          | 1.81 | 1.5E-09 |
| TCFL5      | ENSG00000101190 | transcription factor-like 5 (basic helix-loop-helix) [Source:HGNC<br>Symbol;Acc:11646]      | 1.19 | 1.5E-09 |
| GMDS       | ENSG00000112699 | GDP-mannose 4,6-dehydratase [Source:HGNC Symbol;Acc:4369]                                   | 1.06 | 1.6E-09 |
| ARHGEF19-A | ENSG00000234166 | ARHGEF19 antisense RNA 1 [Source:HGNC Symbol;Acc:39996]                                     | 1.86 | 1.6E-09 |
| TRIT1      | ENSG00000043514 | tRNA isopentenyltransferase 1 [Source:HGNC Symbol;Acc:20286]                                | 1.10 | 1.6E-09 |
| CHIC1      | ENSG00000204116 | cysteine-rich hydrophobic domain 1 [Source:HGNC Symbol;Acc:1934]                            | 1.59 | 1.7E-09 |
| MARCH9     | ENSG00000139266 | membrane-associated ring finger (C3HC4) 9 [Source:HGNC<br>Symbol;Acc:25139]                 | 1.21 | 1.7E-09 |
| TONSL      | ENSG00000160949 | tonsoku-like, DNA repair protein [Source:HGNC Symbol;Acc:7801]                              | 1.65 | 1.8E-09 |
| CD3EAP     | ENSG00000117877 | CD3e molecule, epsilon associated protein [Source:HGNC<br>Symbol;Acc:24219]                 | 1.26 | 1.8E-09 |
| --         | ENSG00000228989 | --                                                                                          | 2.18 | 1.8E-09 |
| WBSCR22    | ENSG00000071462 | Williams Beuren syndrome chromosome region 22 [Source:HGNC<br>Symbol;Acc:16405]             | 1.02 | 1.8E-09 |
| LYSMD2     | ENSG00000140280 | LysM, putative peptidoglycan-binding, domain containing 2<br>[Source:HGNC Symbol;Acc:28571] | 1.63 | 1.9E-09 |
| CCDC104    | ENSG00000163001 | coiled-coil domain containing 104 [Source:HGNC Symbol;Acc:30540]                            | 1.02 | 1.9E-09 |
| JAM3       | ENSG00000166086 | junctional adhesion molecule 3 [Source:HGNC Symbol;Acc:15532]                               | 2.71 | 1.9E-09 |
| MAK16      | ENSG00000198042 | MAK16 homolog ( <i>S. cerevisiae</i> ) [Source:HGNC Symbol;Acc:13703]                       | 1.15 | 2.1E-09 |
| ENAH       | ENSG00000154380 | enabled homolog ( <i>Drosophila</i> ) [Source:HGNC Symbol;Acc:18271]                        | 1.33 | 2.1E-09 |
| SRFBP1     | ENSG00000151304 | serum response factor binding protein 1 [Source:HGNC<br>Symbol;Acc:26333]                   | 1.89 | 2.1E-09 |
| ENOPH1     | ENSG00000145293 | enolase-phosphatase 1 [Source:HGNC Symbol;Acc:24599]                                        | 1.02 | 2.1E-09 |
| DNASE1     | ENSG00000213918 | deoxyribonuclease I [Source:HGNC Symbol;Acc:2956]                                           | 1.12 | 2.2E-09 |
| DHX9       | ENSG00000135829 | DEAH (Asp-Glu-Ala-His) box helicase 9 [Source:HGNC<br>Symbol;Acc:2750]                      | 0.80 | 2.2E-09 |

|          |                 |                                                                                     |      |         |
|----------|-----------------|-------------------------------------------------------------------------------------|------|---------|
| LIAS     | ENSG00000121897 | lipoic acid synthetase [Source:HGNC Symbol;Acc:16429]                               | 1.49 | 2.2E-09 |
| MRS2     | ENSG00000124532 | MRS2 magnesium transporter [Source:HGNC Symbol;Acc:13785]                           | 1.10 | 2.3E-09 |
| QDPR     | ENSG00000151552 | quinoid dihydropteridine reductase [Source:HGNC Symbol;Acc:9752]                    | 0.98 | 2.3E-09 |
| GSTA4    | ENSG00000170899 | glutathione S-transferase alpha 4 [Source:HGNC Symbol;Acc:4629]                     | 1.19 | 2.3E-09 |
| TMEM147  | ENSG00000105677 | transmembrane protein 147 [Source:HGNC Symbol;Acc:30414]                            | 1.14 | 2.4E-09 |
| STAMBPL1 | ENSG00000138134 | STAM binding protein-like 1 [Source:HGNC Symbol;Acc:24105]                          | 0.95 | 2.4E-09 |
| KBTBD7   | ENSG00000120696 | kelch repeat and BTB (POZ) domain containing 7 [Source:HGNC Symbol;Acc:25266]       | 1.65 | 2.4E-09 |
| TP53BP1  | ENSG00000067369 | tumor protein p53 binding protein 1 [Source:HGNC Symbol;Acc:11999]                  | 0.97 | 2.5E-09 |
| MECR     | ENSG00000116353 | mitochondrial trans-2-enoyl-CoA reductase [Source:HGNC Symbol;Acc:19691]            | 1.30 | 2.5E-09 |
| METTL17  | ENSG00000165792 | methyltransferase like 17 [Source:HGNC Symbol;Acc:19280]                            | 0.83 | 2.5E-09 |
| CPSF3    | ENSG00000119203 | cleavage and polyadenylation specific factor 3, 73kDa [Source:HGNC Symbol;Acc:2326] | 0.94 | 2.6E-09 |
| IARS     | ENSG00000196305 | isoleucyl-tRNA synthetase [Source:HGNC Symbol;Acc:5330]                             | 1.20 | 2.6E-09 |
| NUP88    | ENSG00000108559 | nucleoporin 88kDa [Source:HGNC Symbol;Acc:8067]                                     | 0.95 | 2.7E-09 |
| LEPREL2  | ENSG00000110811 | leprecan-like 2 [Source:HGNC Symbol;Acc:19318]                                      | 1.33 | 2.7E-09 |
| FBXO41   | ENSG00000163013 | F-box protein 41 [Source:HGNC Symbol;Acc:29409]                                     | 1.32 | 2.8E-09 |
| PRIMPOL  | ENSG00000164306 | primase and polymerase (DNA-directed) [Source:HGNC Symbol;Acc:26575]                | 1.51 | 2.8E-09 |
| PDSS1    | ENSG00000148459 | prenyl (decaprenyl) diphosphate synthase, subunit 1 [Source:HGNC Symbol;Acc:17759]  | 1.01 | 2.9E-09 |
| FGFR4    | ENSG00000160867 | fibroblast growth factor receptor 4 [Source:HGNC Symbol;Acc:3691]                   | 1.47 | 2.9E-09 |
| RPS29    | ENSG00000213741 | ribosomal protein S29 [Source:HGNC Symbol;Acc:10419]                                | 0.99 | 3.1E-09 |
| ZZZ3     | ENSG00000036549 | zinc finger, ZZ-type containing 3 [Source:HGNC Symbol;Acc:24523]                    | 1.24 | 3.1E-09 |
| GSTM3    | ENSG00000134202 | glutathione S-transferase mu 3 (brain) [Source:HGNC Symbol;Acc:4635]                | 0.77 | 3.1E-09 |
| CDHR1    | ENSG00000148600 | cadherin-related family member 1 [Source:HGNC Symbol;Acc:14550]                     | 2.34 | 3.2E-09 |

|          |                 |                                                                                             |      |         |
|----------|-----------------|---------------------------------------------------------------------------------------------|------|---------|
| MYBL1    | ENSG00000185697 | v-myb avian myeloblastosis viral oncogene homolog-like 1 [Source:HGNC Symbol;Acc:7547]      | 2.83 | 3.2E-09 |
| METTL21A | ENSG00000144401 | methyltransferase like 21A [Source:HGNC Symbol;Acc:30476]                                   | 1.06 | 3.2E-09 |
| NIT2     | ENSG00000114021 | nitrilase family, member 2 [Source:HGNC Symbol;Acc:29878]                                   | 1.03 | 3.3E-09 |
| MRAP     | ENSG00000170262 | melanocortin 2 receptor accessory protein [Source:HGNC Symbol;Acc:1304]                     | 2.12 | 3.3E-09 |
| RPL12    | ENSG00000197958 | ribosomal protein L12 [Source:HGNC Symbol;Acc:10302]                                        | 0.96 | 3.3E-09 |
| WEE1     | ENSG00000166483 | WEE1 G2 checkpoint kinase [Source:HGNC Symbol;Acc:12761]                                    | 1.24 | 3.3E-09 |
| H2AFX    | ENSG00000188486 | H2A histone family, member X [Source:HGNC Symbol;Acc:4739]                                  | 1.43 | 3.4E-09 |
| COQ10A   | ENSG00000135469 | coenzyme Q10 homolog A ( <i>S. cerevisiae</i> ) [Source:HGNC Symbol;Acc:26515]              | 1.46 | 3.4E-09 |
| GIPC2    | ENSG00000137960 | GIPC PDZ domain containing family, member 2 [Source:HGNC Symbol;Acc:18177]                  | 1.09 | 3.4E-09 |
| METTL12  | ENSG00000214756 | methyltransferase like 12 [Source:HGNC Symbol;Acc:33113]                                    | 1.36 | 3.4E-09 |
| C17orf75 | ENSG00000108666 | chromosome 17 open reading frame 75 [Source:HGNC Symbol;Acc:30173]                          | 1.33 | 3.4E-09 |
| --       | ENSG00000258017 | --                                                                                          | 0.78 | 3.4E-09 |
| --       | ENSG00000255328 | --                                                                                          | 2.71 | 3.4E-09 |
| MRPL19   | ENSG00000115364 | mitochondrial ribosomal protein L19 [Source:HGNC Symbol;Acc:14052]                          | 1.21 | 3.5E-09 |
| HOXA11   | ENSG00000005073 | homeobox A11 [Source:HGNC Symbol;Acc:5101]                                                  | 1.17 | 3.5E-09 |
| SERTAD4  | ENSG00000082497 | SERTA domain containing 4 [Source:HGNC Symbol;Acc:25236]                                    | 1.61 | 3.5E-09 |
| DCAF4    | ENSG00000119599 | DDB1 and CUL4 associated factor 4 [Source:HGNC Symbol;Acc:20229]                            | 1.07 | 3.5E-09 |
| EFCAB11  | ENSG00000140025 | EF-hand calcium binding domain 11 [Source:HGNC Symbol;Acc:20357]                            | 1.68 | 3.6E-09 |
| TRMT10C  | ENSG00000174173 | tRNA methyltransferase 10 homolog C ( <i>S. cerevisiae</i> ) [Source:HGNC Symbol;Acc:26022] | 1.19 | 3.7E-09 |

|           |                 |                                                                                                |      |         |
|-----------|-----------------|------------------------------------------------------------------------------------------------|------|---------|
| NDUFB6    | ENSG00000165264 | NADH dehydrogenase (ubiquinone) 1 beta subcomplex, 6, 17kDa<br>[Source:HGNC Symbol;Acc:7701]   | 1.04 | 3.7E-09 |
| RTN4RL1   | ENSG00000185924 | reticulon 4 receptor-like 1 [Source:HGNC Symbol;Acc:21329]                                     | 1.33 | 3.8E-09 |
| UBQLN4    | ENSG00000160803 | ubiquilin 4 [Source:HGNC Symbol;Acc:1237]                                                      | 0.94 | 3.8E-09 |
| HPRT1     | ENSG00000165704 | hypoxanthine phosphoribosyltransferase 1 [Source:HGNC<br>Symbol;Acc:5157]                      | 1.15 | 3.9E-09 |
| DCUN1D5   | ENSG00000137692 | DCN1, defective in cullin neddylation 1, domain containing 5<br>[Source:HGNC Symbol;Acc:28409] | 0.99 | 4.0E-09 |
| SCFD2     | ENSG00000184178 | sec1 family domain containing 2 [Source:HGNC Symbol;Acc:30676]                                 | 1.70 | 4.0E-09 |
| NGFRAP1   | ENSG00000166681 | nerve growth factor receptor (TNFRSF16) associated protein 1<br>[Source:HGNC Symbol;Acc:13388] | 0.91 | 4.0E-09 |
| HAUS8     | ENSG00000131351 | HAUS augmin-like complex, subunit 8 [Source:HGNC<br>Symbol;Acc:30532]                          | 1.71 | 4.0E-09 |
| GLUL      | ENSG00000135821 | glutamate-ammonia ligase [Source:HGNC Symbol;Acc:4341]                                         | 0.71 | 4.1E-09 |
| ZNF138    | ENSG00000197008 | zinc finger protein 138 [Source:HGNC Symbol;Acc:12922]                                         | 1.27 | 4.1E-09 |
| GCDH      | ENSG00000105607 | glutaryl-CoA dehydrogenase [Source:HGNC Symbol;Acc:4189]                                       | 1.57 | 4.1E-09 |
| RAN       | ENSG00000132341 | RAN, member RAS oncogene family [Source:HGNC Symbol;Acc:9846]                                  | 0.73 | 4.3E-09 |
| TMEM5-AS1 | ENSG00000255850 | TMEM5 antisense RNA 1 [Source:HGNC Symbol;Acc:48910]                                           | 1.82 | 4.3E-09 |
| MTCH2     | ENSG00000109919 | mitochondrial carrier 2 [Source:HGNC Symbol;Acc:17587]                                         | 0.68 | 4.3E-09 |
| IQCH-AS1  | ENSG00000259673 | IQCH antisense RNA 1 [Source:HGNC Symbol;Acc:44104]                                            | 1.56 | 4.4E-09 |
| SH3BP4    | ENSG00000130147 | SH3-domain binding protein 4 [Source:HGNC Symbol;Acc:10826]                                    | 1.09 | 4.4E-09 |
| ZNF512    | ENSG00000243943 | zinc finger protein 512 [Source:HGNC Symbol;Acc:29380]                                         | 1.02 | 4.5E-09 |
| ASF1A     | ENSG00000111875 | anti-silencing function 1A histone chaperone [Source:HGNC<br>Symbol;Acc:20995]                 | 1.11 | 4.5E-09 |
| ANKS6     | ENSG00000165138 | ankyrin repeat and sterile alpha motif domain containing 6<br>[Source:HGNC Symbol;Acc:26724]   | 0.88 | 4.5E-09 |
| --        | ENSG00000237594 | --                                                                                             | 3.80 | 4.7E-09 |
| --        | ENSG00000235501 | --                                                                                             | 2.77 | 4.7E-09 |
| GPC4      | ENSG00000076716 | glypican 4 [Source:HGNC Symbol;Acc:4452]                                                       | 1.19 | 4.9E-09 |

|           |                 |                                                                                                      |      |         |
|-----------|-----------------|------------------------------------------------------------------------------------------------------|------|---------|
| --        | ENSG00000270933 | --                                                                                                   | 2.22 | 5.0E-09 |
| GSPT2     | ENSG00000189369 | G1 to S phase transition 2 [Source:HGNC Symbol;Acc:4622]                                             | 1.27 | 5.0E-09 |
| RPS2      | ENSG00000140988 | ribosomal protein S2 [Source:HGNC Symbol;Acc:10404]                                                  | 1.45 | 5.0E-09 |
| WNT10B    | ENSG00000169884 | wingless-type MMTV integration site family, member 10B [Source:HGNC Symbol;Acc:12775]                | 2.40 | 5.1E-09 |
| CCDC109B  | ENSG00000005059 | coiled-coil domain containing 109B [Source:HGNC Symbol;Acc:26076]                                    | 1.18 | 5.1E-09 |
| RPL15     | ENSG00000174748 | ribosomal protein L15 [Source:HGNC Symbol;Acc:10306]                                                 | 0.87 | 5.2E-09 |
| XRCC6     | ENSG00000196419 | X-ray repair complementing defective repair in Chinese hamster cells 6 [Source:HGNC Symbol;Acc:4055] | 0.72 | 5.3E-09 |
| --        | ENSG00000257681 | --                                                                                                   | 2.58 | 5.4E-09 |
| TIGD4     | ENSG00000169989 | tigger transposable element derived 4 [Source:HGNC Symbol;Acc:18335]                                 | 2.64 | 5.4E-09 |
| CYB5D1    | ENSG00000182224 | cytochrome b5 domain containing 1 [Source:HGNC Symbol;Acc:26516]                                     | 1.26 | 5.4E-09 |
| TM7SF3    | ENSG00000064115 | transmembrane 7 superfamily member 3 [Source:HGNC Symbol;Acc:23049]                                  | 0.95 | 5.5E-09 |
| KCNJ11    | ENSG00000187486 | potassium inwardly-rectifying channel, subfamily J, member 11 [Source:HGNC Symbol;Acc:6257]          | 3.48 | 5.5E-09 |
| --        | ENSG00000224739 | --                                                                                                   | 2.04 | 5.6E-09 |
| AGK       | ENSG00000006530 | acylglycerol kinase [Source:HGNC Symbol;Acc:21869]                                                   | 1.03 | 5.6E-09 |
| EHMT2-AS1 | ENSG00000237080 | EHMT2 antisense RNA 1 [Source:HGNC Symbol;Acc:39751]                                                 | 1.74 | 5.6E-09 |
| RHBDL1    | ENSG00000103269 | rhomboid, veinlet-like 1 (Drosophila) [Source:HGNC Symbol;Acc:10007]                                 | 1.94 | 5.6E-09 |
| GLOD4     | ENSG00000167699 | glyoxalase domain containing 4 [Source:HGNC Symbol;Acc:14111]                                        | 0.79 | 5.9E-09 |
| POFUT1    | ENSG00000101346 | protein O-fucosyltransferase 1 [Source:HGNC Symbol;Acc:14988]                                        | 0.89 | 6.0E-09 |
| WNK2      | ENSG00000165238 | WNK lysine deficient protein kinase 2 [Source:HGNC Symbol;Acc:14542]                                 | 1.11 | 6.2E-09 |



|           |                 |                                                                                                    |      |         |
|-----------|-----------------|----------------------------------------------------------------------------------------------------|------|---------|
| ALG1L     | ENSG00000189366 | ALG1, chitobiosyldiphosphodolichol beta-mannosyltransferase-like<br>[Source:HGNC Symbol;Acc:33721] | 1.38 | 6.2E-09 |
| MGST2     | ENSG00000085871 | microsomal glutathione S-transferase 2 [Source:HGNC<br>Symbol;Acc:7063]                            | 0.98 | 6.2E-09 |
| MPHOSPH10 | ENSG00000124383 | M-phase phosphoprotein 10 (U3 small nucleolar ribonucleoprotein)<br>[Source:HGNC Symbol;Acc:7213]  | 1.04 | 6.3E-09 |
| NUDT6     | ENSG00000170917 | nudix (nucleoside diphosphate linked moiety X)-type motif 6<br>[Source:HGNC Symbol;Acc:8053]       | 2.41 | 6.4E-09 |
| QPCTL     | ENSG00000011478 | glutaminyl-peptide cyclotransferase-like [Source:HGNC<br>Symbol;Acc:25952]                         | 1.23 | 6.5E-09 |
| CHORDC1   | ENSG00000110172 | cysteine and histidine-rich domain (CHORD) containing 1<br>[Source:HGNC Symbol;Acc:14525]          | 1.05 | 6.5E-09 |
| TSN       | ENSG00000211460 | translin [Source:HGNC Symbol;Acc:12379]                                                            | 0.86 | 6.6E-09 |
| KRT75     | ENSG00000170454 | keratin 75 [Source:HGNC Symbol;Acc:24431]                                                          | 2.62 | 6.7E-09 |
| --        | ENSG00000237857 | --                                                                                                 | 1.93 | 6.7E-09 |
| NIPSNAP1  | ENSG00000184117 | nipsnap homolog 1 (C. elegans) [Source:HGNC Symbol;Acc:7827]                                       | 1.15 | 6.8E-09 |
| CETN3     | ENSG00000153140 | centrin, EF-hand protein, 3 [Source:HGNC Symbol;Acc:1868]                                          | 1.37 | 6.8E-09 |
| COPS7B    | ENSG00000144524 | COP9 signalosome subunit 7B [Source:HGNC Symbol;Acc:16760]                                         | 0.79 | 6.9E-09 |
| TOMM40    | ENSG00000130204 | translocase of outer mitochondrial membrane 40 homolog (yeast)<br>[Source:HGNC Symbol;Acc:18001]   | 1.53 | 7.0E-09 |
| DDHD1     | ENSG00000100523 | DDHD domain containing 1 [Source:HGNC Symbol;Acc:19714]                                            | 2.15 | 7.0E-09 |
| ZBTB12    | ENSG00000204366 | zinc finger and BTB domain containing 12 [Source:HGNC<br>Symbol;Acc:19066]                         | 1.83 | 7.1E-09 |
| RPL13A    | ENSG00000142541 | ribosomal protein L13a [Source:HGNC Symbol;Acc:10304]                                              | 0.96 | 7.2E-09 |
| SLIRP     | ENSG00000119705 | SRA stem-loop interacting RNA binding protein [Source:HGNC<br>Symbol;Acc:20495]                    | 0.92 | 7.3E-09 |
| ZNF480    | ENSG00000198464 | zinc finger protein 480 [Source:HGNC Symbol;Acc:23305]                                             | 1.06 | 7.5E-09 |
| GLMN      | ENSG00000174842 | glomulin, FKBP associated protein [Source:HGNC Symbol;Acc:14373]                                   | 1.22 | 7.6E-09 |
| PTGDR     | ENSG00000168229 | prostaglandin D2 receptor (DP) [Source:HGNC Symbol;Acc:9591]                                       | 4.18 | 7.7E-09 |

|          |                 |                                                                                                         |      |         |
|----------|-----------------|---------------------------------------------------------------------------------------------------------|------|---------|
| MRPL18   | ENSG00000112110 | mitochondrial ribosomal protein L18 [Source:HGNC Symbol;Acc:14477]                                      | 0.80 | 7.7E-09 |
| TMEM52   | ENSG00000178821 | transmembrane protein 52 [Source:HGNC Symbol;Acc:27916]                                                 | 2.40 | 7.9E-09 |
| ZNF620   | ENSG00000177842 | zinc finger protein 620 [Source:HGNC Symbol;Acc:28742]                                                  | 2.63 | 8.0E-09 |
| RPL37A   | ENSG00000197756 | ribosomal protein L37a [Source:HGNC Symbol;Acc:10348]                                                   | 0.96 | 8.3E-09 |
| HYLS1    | ENSG00000198331 | hydrolethalus syndrome 1 [Source:HGNC Symbol;Acc:26558]                                                 | 1.19 | 8.4E-09 |
| CCT4     | ENSG00000115484 | chaperonin containing TCP1, subunit 4 (delta) [Source:HGNC Symbol;Acc:1617]                             | 0.92 | 8.4E-09 |
| BCL6B    | ENSG00000161940 | B-cell CLL/lymphoma 6, member B [Source:HGNC Symbol;Acc:1002]                                           | 3.60 | 8.6E-09 |
| --       | ENSG00000257761 | --                                                                                                      | 3.59 | 8.9E-09 |
| ECI2     | ENSG00000198721 | enoyl-CoA delta isomerase 2 [Source:HGNC Symbol;Acc:14601]                                              | 1.37 | 9.2E-09 |
| PHC1     | ENSG00000111752 | polyhomeotic homolog 1 (Drosophila) [Source:HGNC Symbol;Acc:3182]                                       | 0.87 | 9.5E-09 |
| FTSJ2    | ENSG00000122687 | FtsJ RNA methyltransferase homolog 2 (E. coli) [Source:HGNC Symbol;Acc:16352]                           | 0.88 | 9.7E-09 |
| --       | ENSG00000261135 | --                                                                                                      | 2.75 | 1.0E-08 |
| N6AMT1   | ENSG00000156239 | N-6 adenine-specific DNA methyltransferase 1 (putative) [Source:HGNC Symbol;Acc:16021]                  | 1.27 | 1.0E-08 |
| EPHB4    | ENSG00000196411 | EPH receptor B4 [Source:HGNC Symbol;Acc:3395]                                                           | 1.14 | 1.0E-08 |
| TMA7     | ENSG00000232112 | translation machinery associated 7 homolog (S. cerevisiae) [Source:HGNC Symbol;Acc:26932]               | 1.07 | 1.0E-08 |
| ZNF146   | ENSG00000167635 | zinc finger protein 146 [Source:HGNC Symbol;Acc:12931]                                                  | 1.09 | 1.0E-08 |
| FANCD2OS | ENSG00000163705 | FANCD2 opposite strand [Source:HGNC Symbol;Acc:28623]                                                   | 1.37 | 1.0E-08 |
| TRAPPC6A | ENSG00000007255 | trafficking protein particle complex 6A [Source:HGNC Symbol;Acc:23069]                                  | 1.62 | 1.0E-08 |
| TOMM70A  | ENSG00000154174 | translocase of outer mitochondrial membrane 70 homolog A (S. cerevisiae) [Source:HGNC Symbol;Acc:11985] | 1.04 | 1.1E-08 |
| EIF2B5   | ENSG00000145191 | eukaryotic translation initiation factor 2B, subunit 5 epsilon, 82kDa [Source:HGNC Symbol;Acc:3261]     | 0.76 | 1.1E-08 |

|           |                 |                                                                                |      |         |
|-----------|-----------------|--------------------------------------------------------------------------------|------|---------|
| TRNT1     | ENSG00000072756 | tRNA nucleotidyl transferase, CCA-adding, 1 [Source:HGNC Symbol;Acc:17341]     | 1.09 | 1.1E-08 |
| PRLR      | ENSG00000113494 | prolactin receptor [Source:HGNC Symbol;Acc:9446]                               | 1.74 | 1.2E-08 |
| MTO1      | ENSG00000135297 | mitochondrial tRNA translation optimization 1 [Source:HGNC Symbol;Acc:19261]   | 1.02 | 1.2E-08 |
| DGCR6L    | ENSG00000128185 | DiGeorge syndrome critical region gene 6-like [Source:HGNC Symbol;Acc:18551]   | 1.46 | 1.2E-08 |
| CDK6      | ENSG00000105810 | cyclin-dependent kinase 6 [Source:HGNC Symbol;Acc:1777]                        | 1.18 | 1.2E-08 |
| ASB13     | ENSG00000196372 | ankyrin repeat and SOCS box containing 13 [Source:HGNC Symbol;Acc:19765]       | 1.10 | 1.2E-08 |
| MYO19     | ENSG00000141140 | myosin XIX [Source:HGNC Symbol;Acc:26234]                                      | 0.76 | 1.2E-08 |
| RMI1      | ENSG00000178966 | RecQ mediated genome instability 1 [Source:HGNC Symbol;Acc:25764]              | 1.43 | 1.2E-08 |
| HIP1      | ENSG00000127946 | huntingtin interacting protein 1 [Source:HGNC Symbol;Acc:4913]                 | 3.17 | 1.3E-08 |
| FAN1      | ENSG00000198690 | FANCD2/FANCI-associated nuclease 1 [Source:HGNC Symbol;Acc:29170]              | 0.99 | 1.3E-08 |
| CENPV     | ENSG00000166582 | centromere protein V [Source:HGNC Symbol;Acc:29920]                            | 0.87 | 1.3E-08 |
| OXA1L     | ENSG00000155463 | oxidase (cytochrome c) assembly 1-like [Source:HGNC Symbol;Acc:8526]           | 0.83 | 1.3E-08 |
| MRPL50    | ENSG00000136897 | mitochondrial ribosomal protein L50 [Source:HGNC Symbol;Acc:16654]             | 1.08 | 1.3E-08 |
| --        | ENSG00000229891 | --                                                                             | 2.00 | 1.4E-08 |
| CEP44     | ENSG00000164118 | centrosomal protein 44kDa [Source:HGNC Symbol;Acc:29356]                       | 1.30 | 1.4E-08 |
| --        | ENSG00000258471 | --                                                                             | 0.99 | 1.4E-08 |
| MKKS      | ENSG00000125863 | McKusick-Kaufman syndrome [Source:HGNC Symbol;Acc:7108]                        | 0.82 | 1.4E-08 |
| COX10     | ENSG00000006695 | cytochrome c oxidase assembly homolog 10 (yeast) [Source:HGNC Symbol;Acc:2260] | 1.30 | 1.4E-08 |
| FEZF1-AS1 | ENSG00000230316 | FEZF1 antisense RNA 1 [Source:HGNC Symbol;Acc:41001]                           | 1.08 | 1.4E-08 |
| RPL34     | ENSG00000109475 | ribosomal protein L34 [Source:HGNC Symbol;Acc:10340]                           | 0.95 | 1.4E-08 |

|         |                 |                                                                                                |      |         |
|---------|-----------------|------------------------------------------------------------------------------------------------|------|---------|
| PINX1   | ENSG00000254093 | PIN2/TERF1 interacting, telomerase inhibitor 1 [Source:HGNC Symbol;Acc:30046]                  | 1.61 | 1.5E-08 |
| WDR70   | ENSG00000082068 | WD repeat domain 70 [Source:HGNC Symbol;Acc:25495]                                             | 1.02 | 1.5E-08 |
| TXNDC12 | ENSG00000117862 | thioredoxin domain containing 12 (endoplasmic reticulum) [Source:HGNC Symbol;Acc:24626]        | 0.91 | 1.5E-08 |
| SRSF3   | ENSG00000112081 | serine/arginine-rich splicing factor 3 [Source:HGNC Symbol;Acc:10785]                          | 0.67 | 1.5E-08 |
| PRR3    | ENSG00000204576 | proline rich 3 [Source:HGNC Symbol;Acc:21149]                                                  | 1.24 | 1.5E-08 |
| OGFOD1  | ENSG00000087263 | 2-oxoglutarate and iron-dependent oxygenase domain containing 1 [Source:HGNC Symbol;Acc:25585] | 0.85 | 1.5E-08 |
| POC5    | ENSG00000152359 | POC5 centriolar protein [Source:HGNC Symbol;Acc:26658]                                         | 1.12 | 1.6E-08 |
| RPL9    | ENSG00000163682 | ribosomal protein L9 [Source:HGNC Symbol;Acc:10369]                                            | 0.94 | 1.6E-08 |
| MRRF    | ENSG00000148187 | mitochondrial ribosome recycling factor [Source:HGNC Symbol;Acc:7234]                          | 0.89 | 1.6E-08 |
| THAP11  | ENSG00000168286 | THAP domain containing 11 [Source:HGNC Symbol;Acc:23194]                                       | 0.93 | 1.6E-08 |
| TTC13   | ENSG00000143643 | tetratricopeptide repeat domain 13 [Source:HGNC Symbol;Acc:26204]                              | 0.99 | 1.6E-08 |
| FBXW9   | ENSG00000132004 | F-box and WD repeat domain containing 9 [Source:HGNC Symbol;Acc:28136]                         | 1.77 | 1.7E-08 |
| PCCA    | ENSG00000175198 | propionyl CoA carboxylase, alpha polypeptide [Source:HGNC Symbol;Acc:8653]                     | 0.89 | 1.7E-08 |
| APMAP   | ENSG00000101474 | adipocyte plasma membrane associated protein [Source:HGNC Symbol;Acc:13238]                    | 0.80 | 1.7E-08 |
| AKAP5   | ENSG00000179841 | A kinase (PRKA) anchor protein 5 [Source:HGNC Symbol;Acc:375]                                  | 1.46 | 1.7E-08 |
| --      | ENSG00000272540 | --                                                                                             | 1.20 | 1.7E-08 |
| SFPQ    | ENSG00000116560 | splicing factor proline/glutamine-rich [Source:HGNC Symbol;Acc:10774]                          | 0.62 | 1.7E-08 |
| PAXIP1  | ENSG00000157212 | PAX interacting (with transcription-activation domain) protein 1 [Source:HGNC Symbol;Acc:8624] | 1.09 | 1.8E-08 |

|          |                 |                                                                                         |      |         |
|----------|-----------------|-----------------------------------------------------------------------------------------|------|---------|
| PPP2R3B  | ENSG00000167393 | protein phosphatase 2, regulatory subunit B'', beta [Source:HGNC Symbol;Acc:13417]      | 1.16 | 1.8E-08 |
| CEP250   | ENSG00000126001 | centrosomal protein 250kDa [Source:HGNC Symbol;Acc:1859]                                | 0.97 | 1.8E-08 |
| LCK      | ENSG00000182866 | lymphocyte-specific protein tyrosine kinase [Source:HGNC Symbol;Acc:6524]               | 2.95 | 1.8E-08 |
| PDPR     | ENSG00000090857 | pyruvate dehydrogenase phosphatase regulatory subunit [Source:HGNC Symbol;Acc:30264]    | 1.41 | 1.8E-08 |
| --       | ENSG00000234818 | --                                                                                      | 1.24 | 1.9E-08 |
| PABPC4   | ENSG00000090621 | poly(A) binding protein, cytoplasmic 4 (inducible form) [Source:HGNC Symbol;Acc:8557]   | 0.80 | 1.9E-08 |
| NIFK-AS1 | ENSG00000236859 | NIFK antisense RNA 1 [Source:HGNC Symbol;Acc:27385]                                     | 1.03 | 1.9E-08 |
| CDK5RAP2 | ENSG00000136861 | CDK5 regulatory subunit associated protein 2 [Source:HGNC Symbol;Acc:18672]             | 0.86 | 2.0E-08 |
| CSTF3    | ENSG00000176102 | cleavage stimulation factor, 3' pre-RNA, subunit 3, 77kDa [Source:HGNC Symbol;Acc:2485] | 1.00 | 2.0E-08 |
| --       | ENSG00000227751 | --                                                                                      | 1.20 | 2.1E-08 |
| INTS9    | ENSG00000104299 | integrator complex subunit 9 [Source:HGNC Symbol;Acc:25592]                             | 1.25 | 2.1E-08 |
| RPL19    | ENSG00000108298 | ribosomal protein L19 [Source:HGNC Symbol;Acc:10312]                                    | 1.06 | 2.1E-08 |
| MRPL2    | ENSG00000112651 | mitochondrial ribosomal protein L2 [Source:HGNC Symbol;Acc:14056]                       | 0.95 | 2.1E-08 |
| SCLY     | ENSG00000132330 | selenocysteine lyase [Source:HGNC Symbol;Acc:18161]                                     | 2.13 | 2.1E-08 |
| GFM1     | ENSG00000168827 | G elongation factor, mitochondrial 1 [Source:HGNC Symbol;Acc:13780]                     | 1.05 | 2.2E-08 |
| --       | ENSG00000216775 | --                                                                                      | 1.48 | 2.2E-08 |
| CCT7     | ENSG00000135624 | chaperonin containing TCP1, subunit 7 (eta) [Source:HGNC Symbol;Acc:1622]               | 0.87 | 2.2E-08 |
| PHF14    | ENSG00000106443 | PHD finger protein 14 [Source:HGNC Symbol;Acc:22203]                                    | 0.98 | 2.3E-08 |
| CD19     | ENSG00000177455 | CD19 molecule [Source:HGNC Symbol;Acc:1633]                                             | 3.14 | 2.3E-08 |
| CDC23    | ENSG00000094880 | cell division cycle 23 [Source:HGNC Symbol;Acc:1724]                                    | 0.95 | 2.3E-08 |

|         |                 |                                                                                                                                          |      |         |
|---------|-----------------|------------------------------------------------------------------------------------------------------------------------------------------|------|---------|
| EXOSC3  | ENSG00000107371 | exosome component 3 [Source:HGNC Symbol;Acc:17944]<br>inhibitor of kappa light polypeptide gene enhancer in B-cells, kinase              | 0.94 | 2.3E-08 |
| IKBKAP  | ENSG00000070061 | complex-associated protein [Source:HGNC Symbol;Acc:5959]<br>COX18 cytochrome C oxidase assembly factor [Source:HGNC                      | 0.97 | 2.3E-08 |
| COX18   | ENSG00000163626 | Symbol;Acc:26801]                                                                                                                        | 1.31 | 2.4E-08 |
| ZNF124  | ENSG00000196418 | zinc finger protein 124 [Source:HGNC Symbol;Acc:12907]                                                                                   | 1.41 | 2.4E-08 |
| NANOS1  | ENSG00000188613 | nanos homolog 1 (Drosophila) [Source:HGNC Symbol;Acc:23044]<br>heterogeneous nuclear ribonucleoprotein H3 (2H9) [Source:HGNC             | 1.36 | 2.4E-08 |
| HNRNPH3 | ENSG00000096746 | Symbol;Acc:5043]<br>spindle apparatus coiled-coil protein 1 [Source:HGNC                                                                 | 0.68 | 2.4E-08 |
| SPDL1   | ENSG00000040275 | Symbol;Acc:26010]<br>extra spindle pole bodies homolog 1 (S. cerevisiae) [Source:HGNC                                                    | 1.12 | 2.4E-08 |
| ESPL1   | ENSG00000135476 | Symbol;Acc:16856]                                                                                                                        | 1.11 | 2.5E-08 |
| AKAP1   | ENSG00000121057 | A kinase (PKA) anchor protein 1 [Source:HGNC Symbol;Acc:367]                                                                             | 0.81 | 2.6E-08 |
| CBWD1   | ENSG00000172785 | COBW domain containing 1 [Source:HGNC Symbol;Acc:17134]                                                                                  | 0.99 | 2.6E-08 |
| RAD1    | ENSG00000113456 | RAD1 homolog (S. pombe) [Source:HGNC Symbol;Acc:9806]<br>ligand dependent nuclear receptor corepressor-like [Source:HGNC                 | 1.03 | 2.6E-08 |
| LCORL   | ENSG00000178177 | Symbol;Acc:30776]                                                                                                                        | 1.29 | 2.6E-08 |
| --      | ENSG00000269990 | --                                                                                                                                       | 1.41 | 2.6E-08 |
| GFRA3   | ENSG00000146013 | GDNF family receptor alpha 3 [Source:HGNC Symbol;Acc:4245]                                                                               | 2.12 | 2.7E-08 |
| --      | ENSG00000230650 | --                                                                                                                                       | 1.81 | 2.8E-08 |
| GCA     | ENSG00000115271 | granulosa cell protein, EF-hand calcium binding protein [Source:HGNC<br>Symbol;Acc:15990]                                                | 1.32 | 2.8E-08 |
| SLC35F2 | ENSG00000110660 | solute carrier family 35, member F2 [Source:HGNC Symbol;Acc:23615]<br>UDP glucuronosyltransferase 2 family, polypeptide B15 [Source:HGNC | 0.96 | 2.9E-08 |
| UGT2B15 | ENSG00000196620 | Symbol;Acc:12546]                                                                                                                        | 3.52 | 2.9E-08 |
| GPHN    | ENSG00000171723 | gephyrin [Source:HGNC Symbol;Acc:15465]                                                                                                  | 1.04 | 2.9E-08 |

|         |                 |                                                                                           |      |         |
|---------|-----------------|-------------------------------------------------------------------------------------------|------|---------|
| FAM221A | ENSG00000188732 | family with sequence similarity 221, member A [Source:HGNC Symbol;Acc:27977]              | 1.49 | 2.9E-08 |
| AK2     | ENSG00000004455 | adenylate kinase 2 [Source:HGNC Symbol;Acc:362]                                           | 0.75 | 2.9E-08 |
| RPLP0   | ENSG00000089157 | ribosomal protein, large, P0 [Source:HGNC Symbol;Acc:10371]                               | 0.88 | 2.9E-08 |
| --      | ENSG00000269974 | --                                                                                        | 3.37 | 3.0E-08 |
| C8orf37 | ENSG00000156172 | chromosome 8 open reading frame 37 [Source:HGNC Symbol;Acc:27232]                         | 2.90 | 3.1E-08 |
| CAPN13  | ENSG00000162949 | calpain 13 [Source:HGNC Symbol;Acc:16663]                                                 | 2.03 | 3.1E-08 |
| LAMB1   | ENSG00000091136 | laminin, beta 1 [Source:HGNC Symbol;Acc:6486]                                             | 0.89 | 3.2E-08 |
| EXOSC6  | ENSG00000223496 | exosome component 6 [Source:HGNC Symbol;Acc:19055]                                        | 1.27 | 3.2E-08 |
| DTNB    | ENSG00000138101 | dystrobrevin, beta [Source:HGNC Symbol;Acc:3058]                                          | 2.98 | 3.2E-08 |
| PDE4DIP | ENSG00000178104 | phosphodiesterase 4D interacting protein [Source:HGNC Symbol;Acc:15580]                   | 0.99 | 3.3E-08 |
| HACL1   | ENSG00000131373 | 2-hydroxyacyl-CoA lyase 1 [Source:HGNC Symbol;Acc:17856]                                  | 1.24 | 3.3E-08 |
| POT1    | ENSG00000128513 | protection of telomeres 1 [Source:HGNC Symbol;Acc:17284]                                  | 1.53 | 3.3E-08 |
| ACVR1C  | ENSG00000123612 | activin A receptor, type IC [Source:HGNC Symbol;Acc:18123]                                | 2.22 | 3.4E-08 |
| SH3D19  | ENSG00000109686 | SH3 domain containing 19 [Source:HGNC Symbol;Acc:30418]                                   | 0.75 | 3.4E-08 |
| --      | ENSG00000233542 | --                                                                                        | 2.83 | 3.5E-08 |
| --      | ENSG00000245750 | --                                                                                        | 4.04 | 3.5E-08 |
| CAMKK1  | ENSG00000004660 | calcium/calmodulin-dependent protein kinase kinase 1, alpha [Source:HGNC Symbol;Acc:1469] | 1.12 | 3.5E-08 |
| MYC     | ENSG00000136997 | v-myc avian myelocytomatosis viral oncogene homolog [Source:HGNC Symbol;Acc:7553]         | 0.95 | 3.6E-08 |
| PAK6    | ENSG00000137843 | p21 protein (Cdc42/Rac)-activated kinase 6 [Source:HGNC Symbol;Acc:16061]                 | 1.84 | 3.6E-08 |
| OTUD6B  | ENSG00000155100 | OTU domain containing 6B [Source:HGNC Symbol;Acc:24281]                                   | 1.60 | 3.6E-08 |
| --      | ENSG00000254682 | --                                                                                        | 2.03 | 3.6E-08 |
| SNRPG   | ENSG00000143977 | small nuclear ribonucleoprotein polypeptide G [Source:HGNC Symbol;Acc:11163]              | 0.88 | 3.6E-08 |

|          |                 |                                                                                                    |      |         |
|----------|-----------------|----------------------------------------------------------------------------------------------------|------|---------|
| --       | ENSG00000250266 | --                                                                                                 | 2.02 | 3.7E-08 |
| PEMT     | ENSG00000133027 | phosphatidylethanolamine N-methyltransferase [Source:HGNC Symbol;Acc:8830]                         | 1.63 | 3.7E-08 |
| IRF8     | ENSG00000140968 | interferon regulatory factor 8 [Source:HGNC Symbol;Acc:5358]                                       | 1.13 | 3.7E-08 |
| PPOX     | ENSG00000143224 | protoporphyrinogen oxidase [Source:HGNC Symbol;Acc:9280]                                           | 1.29 | 3.7E-08 |
| C17orf80 | ENSG00000141219 | chromosome 17 open reading frame 80 [Source:HGNC Symbol;Acc:29601]                                 | 1.01 | 3.8E-08 |
| APOBEC3C | ENSG00000244509 | apolipoprotein B mRNA editing enzyme, catalytic polypeptide-like 3C [Source:HGNC Symbol;Acc:17353] | 1.67 | 3.8E-08 |
| RPS27    | ENSG00000177954 | ribosomal protein S27 [Source:HGNC Symbol;Acc:10416]                                               | 0.83 | 3.9E-08 |
| SCAMP5   | ENSG00000198794 | secretory carrier membrane protein 5 [Source:HGNC Symbol;Acc:30386]                                | 1.88 | 3.9E-08 |
| ADCK1    | ENSG00000063761 | aarF domain containing kinase 1 [Source:HGNC Symbol;Acc:19038]                                     | 1.44 | 4.0E-08 |
| ZSCAN12  | ENSG00000158691 | zinc finger and SCAN domain containing 12 [Source:HGNC Symbol;Acc:13172]                           | 2.33 | 4.0E-08 |
| NEIL2    | ENSG00000154328 | nei endonuclease VIII-like 2 (E. coli) [Source:HGNC Symbol;Acc:18956]                              | 1.63 | 4.1E-08 |
| SNHG17   | ENSG00000196756 | small nucleolar RNA host gene 17 (non-protein coding) [Source:HGNC Symbol;Acc:48600]               | 1.26 | 4.2E-08 |
| RFXAP    | ENSG00000133111 | regulatory factor X-associated protein [Source:HGNC Symbol;Acc:9988]                               | 1.72 | 4.3E-08 |
| HAGHL    | ENSG00000103253 | hydroxyacylglutathione hydrolase-like [Source:HGNC Symbol;Acc:14177]                               | 1.31 | 4.3E-08 |
| GTPBP3   | ENSG00000130299 | GTP binding protein 3 (mitochondrial) [Source:HGNC Symbol;Acc:14880]                               | 1.37 | 4.4E-08 |
| UBE2S    | ENSG00000108106 | ubiquitin-conjugating enzyme E2S [Source:HGNC Symbol;Acc:17895]                                    | 1.67 | 4.4E-08 |
| RGS14    | ENSG00000169220 | regulator of G-protein signaling 14 [Source:HGNC Symbol;Acc:9996]                                  | 1.11 | 4.4E-08 |
| CMC2     | ENSG00000103121 | C-x(9)-C motif containing 2 [Source:HGNC Symbol;Acc:24447]                                         | 0.99 | 4.6E-08 |
| EFCAB7   | ENSG00000203965 | EF-hand calcium binding domain 7 [Source:HGNC Symbol;Acc:29379]                                    | 2.06 | 4.8E-08 |



|           |                 |                                                                                                                                  |      |         |
|-----------|-----------------|----------------------------------------------------------------------------------------------------------------------------------|------|---------|
| FBXL8     | ENSG00000135722 | F-box and leucine-rich repeat protein 8 [Source:HGNC Symbol;Acc:17875]                                                           | 1.34 | 4.8E-08 |
| MZT1      | ENSG00000204899 | mitotic spindle organizing protein 1 [Source:HGNC Symbol;Acc:33830]                                                              | 1.30 | 4.9E-08 |
| CMBL      | ENSG00000164237 | carboxymethylenebutenolidase homolog (Pseudomonas) [Source:HGNC Symbol;Acc:25090]                                                | 0.93 | 4.9E-08 |
| APOLD1    | ENSG00000178878 | apolipoprotein L domain containing 1 [Source:HGNC Symbol;Acc:25268]                                                              | 1.51 | 4.9E-08 |
| TANGO6    | ENSG00000103047 | transport and golgi organization 6 homolog (Drosophila) [Source:HGNC Symbol;Acc:25749]                                           | 1.25 | 4.9E-08 |
| TIMM8B    | ENSG00000150779 | translocase of inner mitochondrial membrane 8 homolog B (yeast) [Source:HGNC Symbol;Acc:11818]                                   | 0.93 | 4.9E-08 |
| SAMM50    | ENSG00000100347 | SAMM50 sorting and assembly machinery component [Source:HGNC Symbol;Acc:24276]                                                   | 0.88 | 5.0E-08 |
| PRADC1    | ENSG00000135617 | protease-associated domain containing 1 [Source:HGNC Symbol;Acc:16047]                                                           | 1.24 | 5.0E-08 |
| LINC01106 | ENSG00000175772 | long intergenic non-protein coding RNA 1106 [Source:HGNC Symbol;Acc:26769]                                                       | 1.42 | 5.1E-08 |
| --        | ENSG00000251556 | --                                                                                                                               | 1.26 | 5.1E-08 |
| SCPEP1    | ENSG00000121064 | serine carboxypeptidase 1 [Source:HGNC Symbol;Acc:29507]                                                                         | 0.93 | 5.1E-08 |
| TUBA1B    | ENSG00000123416 | tubulin, alpha 1b [Source:HGNC Symbol;Acc:18809]                                                                                 | 0.85 | 5.3E-08 |
| SMARCE1   | ENSG00000073584 | SWI/SNF related, matrix associated, actin dependent regulator of chromatin, subfamily e, member 1 [Source:HGNC Symbol;Acc:11109] | 0.91 | 5.4E-08 |
| UPF3A     | ENSG00000169062 | UPF3 regulator of nonsense transcripts homolog A (yeast) [Source:HGNC Symbol;Acc:20332]                                          | 0.82 | 5.4E-08 |
| COLEC11   | ENSG00000118004 | collectin sub-family member 11 [Source:HGNC Symbol;Acc:17213]                                                                    | 2.99 | 5.7E-08 |
| EXOSC8    | ENSG00000120699 | exosome component 8 [Source:HGNC Symbol;Acc:17035]                                                                               | 1.09 | 5.8E-08 |
| EEFSEC    | ENSG00000132394 | eukaryotic elongation factor, selenocysteine-tRNA-specific [Source:HGNC Symbol;Acc:24614]                                        | 1.40 | 5.9E-08 |

|           |                 |                                                                    |      |         |
|-----------|-----------------|--------------------------------------------------------------------|------|---------|
| RBM19     | ENSG00000122965 | RNA binding motif protein 19 [Source:HGNC Symbol;Acc:29098]        | 0.96 | 5.9E-08 |
| DBR1      | ENSG00000138231 | debranching RNA lariats 1 [Source:HGNC Symbol;Acc:15594]           | 1.26 | 6.0E-08 |
|           |                 | ubiquitin family domain containing 1 [Source:HGNC                  |      |         |
| UBFD1     | ENSG00000103353 | Symbol;Acc:30565]                                                  | 0.79 | 6.0E-08 |
| RAE1      | ENSG00000101146 | ribonucleic acid export 1 [Source:HGNC Symbol;Acc:9828]            | 0.70 | 6.1E-08 |
| --        | ENSG00000226706 | --                                                                 | 1.45 | 6.1E-08 |
| TEX10     | ENSG00000136891 | testis expressed 10 [Source:HGNC Symbol;Acc:25988]                 | 0.77 | 6.1E-08 |
| --        | ENSG00000272093 | --                                                                 | 2.35 | 6.2E-08 |
| IQCC      | ENSG00000160051 | IQ motif containing C [Source:HGNC Symbol;Acc:25545]               | 1.61 | 6.2E-08 |
|           |                 | structural maintenance of chromosomes 1A [Source:HGNC              |      |         |
| SMC1A     | ENSG00000072501 | Symbol;Acc:11111]                                                  | 0.95 | 6.2E-08 |
| NOL9      | ENSG00000162408 | nucleolar protein 9 [Source:HGNC Symbol;Acc:26265]                 | 1.07 | 6.3E-08 |
|           |                 | solute carrier family 25 (mitochondrial folate carrier), member 32 |      |         |
| SLC25A32  | ENSG00000164933 | [Source:HGNC Symbol;Acc:29683]                                     | 1.21 | 6.3E-08 |
|           |                 | acyl-CoA synthetase medium-chain family member 3 [Source:HGNC      |      |         |
| ACSM3     | ENSG00000005187 | Symbol;Acc:10522]                                                  | 1.32 | 6.4E-08 |
|           |                 | ATP-binding cassette, sub-family A (ABC1), member 2 [Source:HGNC   |      |         |
| ABCA2     | ENSG00000107331 | Symbol;Acc:32]                                                     | 1.22 | 6.5E-08 |
| TCF3      | ENSG00000071564 | transcription factor 3 [Source:HGNC Symbol;Acc:11633]              | 0.92 | 6.5E-08 |
| --        | ENSG00000272434 | --                                                                 | 1.90 | 6.5E-08 |
| PRRT3-AS1 | ENSG00000230082 | PRRT3 antisense RNA 1 [Source:HGNC Symbol;Acc:41151]               | 2.09 | 6.6E-08 |
|           |                 | RAB11 family interacting protein 3 (class II) [Source:HGNC         |      |         |
| RAB11FIP3 | ENSG00000090565 | Symbol;Acc:17224]                                                  | 0.95 | 6.6E-08 |
| PDCD7     | ENSG00000090470 | programmed cell death 7 [Source:HGNC Symbol;Acc:8767]              | 0.96 | 6.6E-08 |
| TBCD      | ENSG00000141556 | tubulin folding cofactor D [Source:HGNC Symbol;Acc:11581]          | 1.09 | 6.6E-08 |
|           |                 | family with sequence similarity 86, member C2, pseudogene          |      |         |
| FAM86C2P  | ENSG00000160172 | [Source:HGNC Symbol;Acc:42392]                                     | 1.44 | 6.6E-08 |
|           |                 | EMG1 N1-specific pseudouridine methyltransferase [Source:HGNC      |      |         |
| EMG1      | ENSG00000126749 | Symbol;Acc:16912]                                                  | 0.91 | 6.6E-08 |

|           |                 |                                                                                                                               |      |         |
|-----------|-----------------|-------------------------------------------------------------------------------------------------------------------------------|------|---------|
| HOXA11-AS | ENSG00000240990 | HOXA11 antisense RNA [Source:HGNC Symbol;Acc:24957]                                                                           | 1.20 | 6.7E-08 |
| PDZRN3    | ENSG00000121440 | PDZ domain containing ring finger 3 [Source:HGNC Symbol;Acc:17704]                                                            | 2.84 | 6.8E-08 |
| RRP8      | ENSG00000132275 | ribosomal RNA processing 8, methyltransferase, homolog (yeast) [Source:HGNC Symbol;Acc:29030]                                 | 0.92 | 6.9E-08 |
| ZNF280D   | ENSG00000137871 | zinc finger protein 280D [Source:HGNC Symbol;Acc:25953]                                                                       | 1.13 | 6.9E-08 |
| MTBP      | ENSG00000172167 | Mdm2, transformed 3T3 cell double minute 2, p53 binding protein (mouse) binding protein, 104kDa [Source:HGNC Symbol;Acc:7417] | 1.07 | 7.1E-08 |
| AAAS      | ENSG00000094914 | achalasia, adrenocortical insufficiency, alacrimia [Source:HGNC Symbol;Acc:13666]                                             | 1.04 | 7.1E-08 |
| COL18A1   | ENSG00000182871 | collagen, type XVIII, alpha 1 [Source:HGNC Symbol;Acc:2195]                                                                   | 3.13 | 7.2E-08 |
| SLC28A2   | ENSG00000137860 | solute carrier family 28 (concentrative nucleoside transporter), member 2 [Source:HGNC Symbol;Acc:11002]                      | 1.54 | 7.2E-08 |
| NGDN      | ENSG00000129460 | neuroguidin, EIF4E binding protein [Source:HGNC Symbol;Acc:20271]                                                             | 0.78 | 7.2E-08 |
| CDH24     | ENSG00000139880 | cadherin 24, type 2 [Source:HGNC Symbol;Acc:14265]                                                                            | 1.36 | 7.2E-08 |
| PPRC1     | ENSG00000148840 | peroxisome proliferator-activated receptor gamma, coactivator-related 1 [Source:HGNC Symbol;Acc:30025]                        | 1.08 | 7.4E-08 |
| ATOH1     | ENSG00000172238 | atonal homolog 1 (Drosophila) [Source:HGNC Symbol;Acc:797]                                                                    | 2.64 | 7.4E-08 |
| TUBGCP4   | ENSG00000137822 | tubulin, gamma complex associated protein 4 [Source:HGNC Symbol;Acc:16691]                                                    | 1.11 | 7.5E-08 |
| PEX6      | ENSG00000124587 | peroxisomal biogenesis factor 6 [Source:HGNC Symbol;Acc:8859]                                                                 | 1.44 | 7.5E-08 |
| SEPT7P2   | ENSG00000214765 | septin 7 pseudogene 2 [Source:HGNC Symbol;Acc:32339]                                                                          | 1.26 | 7.5E-08 |
| TEX261    | ENSG00000144043 | testis expressed 261 [Source:HGNC Symbol;Acc:30712]                                                                           | 0.71 | 7.5E-08 |
| TRMT11    | ENSG00000066651 | tRNA methyltransferase 11 homolog (S. cerevisiae) [Source:HGNC Symbol;Acc:21080]                                              | 1.09 | 7.6E-08 |
| CPNE7     | ENSG00000178773 | copine VII [Source:HGNC Symbol;Acc:2320]                                                                                      | 1.54 | 7.6E-08 |
| ZNF273    | ENSG00000198039 | zinc finger protein 273 [Source:HGNC Symbol;Acc:13067]                                                                        | 1.70 | 7.6E-08 |
| FAHD2A    | ENSG00000115042 | fumarylacetoacetate hydrolase domain containing 2A [Source:HGNC Symbol;Acc:24252]                                             | 1.30 | 7.8E-08 |

|         |                 |                                                                                                                |      |         |
|---------|-----------------|----------------------------------------------------------------------------------------------------------------|------|---------|
| NOA1    | ENSG00000084092 | nitric oxide associated 1 [Source:HGNC Symbol;Acc:28473]                                                       | 0.92 | 8.0E-08 |
| RPL35   | ENSG00000136942 | ribosomal protein L35 [Source:HGNC Symbol;Acc:10344]                                                           | 1.05 | 8.2E-08 |
| SUPV3L1 | ENSG00000156502 | suppressor of var1, 3-like 1 ( <i>S. cerevisiae</i> ) [Source:HGNC Symbol;Acc:11471]                           | 1.00 | 8.3E-08 |
| SMIM20  | ENSG00000250317 | small integral membrane protein 20 [Source:HGNC Symbol;Acc:37260]                                              | 1.07 | 8.6E-08 |
| PPIP5K2 | ENSG00000145725 | diphosphoinositol pentakisphosphate kinase 2 [Source:HGNC Symbol;Acc:29035]                                    | 1.07 | 8.6E-08 |
| SLC18B1 | ENSG00000146409 | solute carrier family 18, subfamily B, member 1 [Source:HGNC Symbol;Acc:21573]                                 | 1.05 | 8.6E-08 |
| TUBGCP3 | ENSG00000126216 | tubulin, gamma complex associated protein 3 [Source:HGNC Symbol;Acc:18598]                                     | 0.78 | 8.7E-08 |
| RFWD3   | ENSG00000168411 | ring finger and WD repeat domain 3 [Source:HGNC Symbol;Acc:25539]                                              | 0.85 | 8.7E-08 |
| CCDC113 | ENSG00000103021 | coiled-coil domain containing 113 [Source:HGNC Symbol;Acc:25002]                                               | 1.53 | 8.8E-08 |
| CBWD2   | ENSG00000136682 | COBW domain containing 2 [Source:HGNC Symbol;Acc:17907]                                                        | 1.03 | 8.9E-08 |
| BCAT2   | ENSG00000105552 | branched chain amino-acid transaminase 2, mitochondrial [Source:HGNC Symbol;Acc:977]                           | 1.36 | 9.0E-08 |
| ISYNA1  | ENSG00000105655 | inositol-3-phosphate synthase 1 [Source:HGNC Symbol;Acc:29821]                                                 | 1.64 | 9.0E-08 |
| FANCF   | ENSG00000183161 | Fanconi anemia, complementation group F [Source:HGNC Symbol;Acc:3587]                                          | 1.01 | 9.0E-08 |
| SNAPC5  | ENSG00000174446 | small nuclear RNA activating complex, polypeptide 5, 19kDa [Source:HGNC Symbol;Acc:15484]                      | 0.93 | 9.3E-08 |
| TAF9    | ENSG00000085231 | TAF9 RNA polymerase II, TATA box binding protein (TBP)-associated factor, 32kDa [Source:HGNC Symbol;Acc:11542] | 0.85 | 9.5E-08 |
| PKDCC   | ENSG00000162878 | protein kinase domain containing, cytoplasmic [Source:HGNC Symbol;Acc:25123]                                   | 1.19 | 9.5E-08 |
| --      | ENSG00000272599 | --                                                                                                             | 2.15 | 9.5E-08 |

|          |                 |                                                                                                         |      |         |
|----------|-----------------|---------------------------------------------------------------------------------------------------------|------|---------|
| ZCCHC11  | ENSG00000134744 | zinc finger, CCHC domain containing 11 [Source:HGNC Symbol;Acc:28981]                                   | 1.03 | 9.5E-08 |
| --       | ENSG00000204802 | --                                                                                                      | 2.32 | 9.6E-08 |
| HES6     | ENSG00000144485 | hes family bHLH transcription factor 6 [Source:HGNC Symbol;Acc:18254]                                   | 1.41 | 9.6E-08 |
| PCCB     | ENSG00000114054 | propionyl CoA carboxylase, beta polypeptide [Source:HGNC Symbol;Acc:8654]                               | 0.86 | 9.8E-08 |
| ARL10    | ENSG00000175414 | ADP-ribosylation factor-like 10 [Source:HGNC Symbol;Acc:22042]                                          | 1.35 | 9.9E-08 |
| EI24     | ENSG00000149547 | etoposide induced 2.4 [Source:HGNC Symbol;Acc:13276]                                                    | 0.63 | 1.0E-07 |
| QRSL1    | ENSG00000130348 | glutaminyl-tRNA synthase (glutamine-hydrolyzing)-like 1 [Source:HGNC Symbol;Acc:21020]                  | 0.90 | 1.0E-07 |
| --       | ENSG00000269621 | --                                                                                                      | 0.93 | 1.0E-07 |
| DHRS4L2  | ENSG00000187630 | dehydrogenase/reductase (SDR family) member 4 like 2 [Source:HGNC Symbol;Acc:19731]                     | 1.24 | 1.0E-07 |
| KDELC1   | ENSG00000134901 | KDEL (Lys-Asp-Glu-Leu) containing 1 [Source:HGNC Symbol;Acc:19350]                                      | 2.93 | 1.1E-07 |
| C21orf59 | ENSG00000159079 | chromosome 21 open reading frame 59 [Source:HGNC Symbol;Acc:1301]                                       | 1.31 | 1.1E-07 |
| C5       | ENSG00000106804 | complement component 5 [Source:HGNC Symbol;Acc:1331]                                                    | 1.58 | 1.1E-07 |
| GNB2L1   | ENSG00000204628 | guanine nucleotide binding protein (G protein), beta polypeptide 2-like 1 [Source:HGNC Symbol;Acc:4399] | 0.98 | 1.1E-07 |
| TIGD1    | ENSG00000221944 | tigger transposable element derived 1 [Source:HGNC Symbol;Acc:14523]                                    | 1.35 | 1.1E-07 |
| ANKRD32  | ENSG00000133302 | ankyrin repeat domain 32 [Source:HGNC Symbol;Acc:25408]                                                 | 1.76 | 1.1E-07 |
| SCAI     | ENSG00000173611 | suppressor of cancer cell invasion [Source:HGNC Symbol;Acc:26709]                                       | 1.63 | 1.1E-07 |
| NACA     | ENSG00000196531 | nascent polypeptide-associated complex alpha subunit [Source:HGNC Symbol;Acc:7629]                      | 0.66 | 1.1E-07 |
| GCAT     | ENSG00000100116 | glycine C-acetyltransferase [Source:HGNC Symbol;Acc:4188]                                               | 1.85 | 1.1E-07 |

|          |                 |                                                                                                                                   |      |         |
|----------|-----------------|-----------------------------------------------------------------------------------------------------------------------------------|------|---------|
| TOPBP1   | ENSG00000163781 | topoisomerase (DNA) II binding protein 1 [Source:HGNC Symbol;Acc:17008]                                                           | 1.07 | 1.2E-07 |
| --       | ENSG00000261668 | --                                                                                                                                | 2.24 | 1.2E-07 |
| NANOS3   | ENSG00000187556 | nanos homolog 3 (Drosophila) [Source:HGNC Symbol;Acc:22048]                                                                       | 2.34 | 1.2E-07 |
| AASDHPPT | ENSG00000149313 | aminoadipate-semialdehyde dehydrogenase-phosphopantetheinyl transferase [Source:HGNC Symbol;Acc:14235]                            | 1.24 | 1.2E-07 |
| ADH6     | ENSG00000172955 | alcohol dehydrogenase 6 (class V) [Source:HGNC Symbol;Acc:255]                                                                    | 3.24 | 1.2E-07 |
| PRDX6    | ENSG00000117592 | peroxiredoxin 6 [Source:HGNC Symbol;Acc:16753]                                                                                    | 0.80 | 1.2E-07 |
| PCBD1    | ENSG00000166228 | pterin-4 alpha-carbinolamine dehydratase/dimerization cofactor of hepatocyte nuclear factor 1 alpha [Source:HGNC Symbol;Acc:8646] | 0.68 | 1.2E-07 |
| NUPL2    | ENSG00000136243 | nucleoporin like 2 [Source:HGNC Symbol;Acc:17010]                                                                                 | 1.16 | 1.3E-07 |
| CEP152   | ENSG00000103995 | centrosomal protein 152kDa [Source:HGNC Symbol;Acc:29298]                                                                         | 1.36 | 1.3E-07 |
| HOXB4    | ENSG00000182742 | homeobox B4 [Source:HGNC Symbol;Acc:5115]                                                                                         | 1.39 | 1.3E-07 |
| ZBTB24   | ENSG00000112365 | zinc finger and BTB domain containing 24 [Source:HGNC Symbol;Acc:21143]                                                           | 1.13 | 1.3E-07 |
| NUDC     | ENSG00000090273 | nudC nuclear distribution protein [Source:HGNC Symbol;Acc:8045]                                                                   | 0.81 | 1.3E-07 |
| M6PR     | ENSG00000003056 | mannose-6-phosphate receptor (cation dependent) [Source:HGNC Symbol;Acc:6752]                                                     | 0.85 | 1.3E-07 |
| MARC2    | ENSG00000117791 | mitochondrial amidoxime reducing component 2 [Source:HGNC Symbol;Acc:26064]                                                       | 1.02 | 1.3E-07 |
| UTP6     | ENSG00000108651 | UTP6, small subunit (SSU) processome component, homolog (yeast) [Source:HGNC Symbol;Acc:18279]                                    | 0.80 | 1.3E-07 |
| BMP7     | ENSG00000101144 | bone morphogenetic protein 7 [Source:HGNC Symbol;Acc:1074]                                                                        | 3.89 | 1.3E-07 |
| COMMD6   | ENSG00000188243 | COMM domain containing 6 [Source:HGNC Symbol;Acc:24015]                                                                           | 1.03 | 1.3E-07 |
| --       | ENSG00000271936 | --                                                                                                                                | 2.05 | 1.3E-07 |
| TMEM186  | ENSG00000184857 | transmembrane protein 186 [Source:HGNC Symbol;Acc:24530]                                                                          | 1.10 | 1.4E-07 |
| CABP1    | ENSG00000157782 | calcium binding protein 1 [Source:HGNC Symbol;Acc:1384]                                                                           | 2.14 | 1.4E-07 |
| MRPS28   | ENSG00000147586 | mitochondrial ribosomal protein S28 [Source:HGNC Symbol;Acc:14513]                                                                | 1.52 | 1.4E-07 |

|           |                 |                                                                                                                                                |      |         |
|-----------|-----------------|------------------------------------------------------------------------------------------------------------------------------------------------|------|---------|
| LBR       | ENSG00000143815 | lamin B receptor [Source:HGNC Symbol;Acc:6518]                                                                                                 | 1.18 | 1.4E-07 |
| EXOG      | ENSG00000157036 | endo/exonuclease (5'-3'), endonuclease G-like [Source:HGNC Symbol;Acc:3347]                                                                    | 1.07 | 1.4E-07 |
| SNRPA1    | ENSG00000131876 | small nuclear ribonucleoprotein polypeptide A' [Source:HGNC Symbol;Acc:11152]                                                                  | 0.74 | 1.4E-07 |
| EXPH5     | ENSG00000110723 | exophilin 5 [Source:HGNC Symbol;Acc:30578]                                                                                                     | 1.25 | 1.4E-07 |
| LRTOMT    | ENSG00000184154 | leucine rich transmembrane and O-methyltransferase domain containing [Source:HGNC Symbol;Acc:25033]                                            | 0.88 | 1.4E-07 |
| LSM6      | ENSG00000164167 | LSM6 homolog, U6 small nuclear RNA associated ( <i>S. cerevisiae</i> ) [Source:HGNC Symbol;Acc:17017]                                          | 1.19 | 1.4E-07 |
| --        | ENSG00000225721 | --                                                                                                                                             | 1.35 | 1.5E-07 |
| CYP4X1    | ENSG00000186377 | cytochrome P450, family 4, subfamily X, polypeptide 1 [Source:HGNC Symbol;Acc:20244]                                                           | 3.46 | 1.5E-07 |
| ANP32E    | ENSG00000143401 | acidic (leucine-rich) nuclear phosphoprotein 32 family, member E [Source:HGNC Symbol;Acc:16673]                                                | 1.17 | 1.5E-07 |
| RHPN1-AS1 | ENSG00000254389 | RHPN1 antisense RNA 1 (head to head) [Source:HGNC Symbol;Acc:28457]                                                                            | 2.02 | 1.5E-07 |
| TEX2      | ENSG00000136478 | testis expressed 2 [Source:HGNC Symbol;Acc:30884]                                                                                              | 0.87 | 1.5E-07 |
| TGFBRAP1  | ENSG00000135966 | transforming growth factor, beta receptor associated protein 1 [Source:HGNC Symbol;Acc:16836]                                                  | 0.75 | 1.5E-07 |
| CAT       | ENSG00000121691 | catalase [Source:HGNC Symbol;Acc:1516]                                                                                                         | 1.28 | 1.5E-07 |
| ACP1      | ENSG00000143727 | acid phosphatase 1, soluble [Source:HGNC Symbol;Acc:122]                                                                                       | 0.78 | 1.5E-07 |
| RQCD1     | ENSG00000144580 | RCD1 required for cell differentiation1 homolog ( <i>S. pombe</i> ) [Source:HGNC Symbol;Acc:10445]                                             | 0.69 | 1.6E-07 |
| MCCC1-AS1 | ENSG00000243368 | MCCC1 antisense RNA 1 [Source:HGNC Symbol;Acc:40366]                                                                                           | 1.66 | 1.6E-07 |
| SMARCAD1  | ENSG00000163104 | SWI/SNF-related, matrix-associated actin-dependent regulator of chromatin, subfamily a, containing DEAD/H box 1 [Source:HGNC Symbol;Acc:18398] | 1.23 | 1.6E-07 |

|         |                 |                                                                                                                 |      |         |
|---------|-----------------|-----------------------------------------------------------------------------------------------------------------|------|---------|
| DHRS2   | ENSG00000100867 | dehydrogenase/reductase (SDR family) member 2 [Source:HGNC Symbol;Acc:18349]                                    | 2.09 | 1.6E-07 |
| ZNF695  | ENSG00000197472 | zinc finger protein 695 [Source:HGNC Symbol;Acc:30954]                                                          | 2.06 | 1.6E-07 |
| FAM72A  | ENSG00000196550 | family with sequence similarity 72, member A [Source:HGNC Symbol;Acc:24044]                                     | 2.53 | 1.6E-07 |
| AZI1    | ENSG00000141577 | 5-azacytidine induced 1 [Source:HGNC Symbol;Acc:29511]                                                          | 1.22 | 1.6E-07 |
| CITED1  | ENSG00000125931 | Cbp/p300-interacting transactivator, with Glu/Asp-rich carboxy-terminal domain, 1 [Source:HGNC Symbol;Acc:1986] | 2.28 | 1.7E-07 |
| --      | ENSG00000270823 | hsa-mir-335 [Source:miRBase;Acc:MI0000816]                                                                      | 1.73 | 1.7E-07 |
| ZNF519  | ENSG00000175322 | zinc finger protein 519 [Source:HGNC Symbol;Acc:30574]                                                          | 3.00 | 1.7E-07 |
| SUOX    | ENSG00000139531 | sulfite oxidase [Source:HGNC Symbol;Acc:11460]                                                                  | 0.80 | 1.7E-07 |
| TIFA    | ENSG00000145365 | TRAF-interacting protein with forkhead-associated domain [Source:HGNC Symbol;Acc:19075]                         | 1.34 | 1.7E-07 |
| --      | ENSG00000226088 | --                                                                                                              | 2.54 | 1.7E-07 |
| C9orf41 | ENSG00000156017 | chromosome 9 open reading frame 41 [Source:HGNC Symbol;Acc:23435]                                               | 1.21 | 1.7E-07 |
| E2F5    | ENSG00000133740 | E2F transcription factor 5, p130-binding [Source:HGNC Symbol;Acc:3119]                                          | 0.90 | 1.9E-07 |
| COPS3   | ENSG00000141030 | COP9 signalosome subunit 3 [Source:HGNC Symbol;Acc:2239]                                                        | 0.97 | 1.9E-07 |
| SEPN1   | ENSG00000162430 | selenoprotein N, 1 [Source:HGNC Symbol;Acc:15999]                                                               | 0.92 | 1.9E-07 |
| SYBU    | ENSG00000147642 | syntabulin (syntaxin-interacting) [Source:HGNC Symbol;Acc:26011]                                                | 1.38 | 1.9E-07 |
| FOPNL   | ENSG00000133393 | FGFR1OP N-terminal like [Source:HGNC Symbol;Acc:26435]                                                          | 0.99 | 1.9E-07 |
| PPP1R1B | ENSG00000131771 | protein phosphatase 1, regulatory (inhibitor) subunit 1B [Source:HGNC Symbol;Acc:9287]                          | 1.04 | 1.9E-07 |
| ALDH3A1 | ENSG00000108602 | aldehyde dehydrogenase 3 family, member A1 [Source:HGNC Symbol;Acc:405]                                         | 2.28 | 2.0E-07 |
| RPL27A  | ENSG00000166441 | ribosomal protein L27a [Source:HGNC Symbol;Acc:10329]                                                           | 1.00 | 2.0E-07 |
| PLCG1   | ENSG00000124181 | phospholipase C, gamma 1 [Source:HGNC Symbol;Acc:9065]                                                          | 0.76 | 2.0E-07 |
| ARRB2   | ENSG00000141480 | arrestin, beta 2 [Source:HGNC Symbol;Acc:712]                                                                   | 1.00 | 2.0E-07 |



|            |                 |                                                                                                   |      |         |
|------------|-----------------|---------------------------------------------------------------------------------------------------|------|---------|
| PCGF6      | ENSG00000156374 | polycomb group ring finger 6 [Source:HGNC Symbol;Acc:21156]                                       | 1.21 | 2.0E-07 |
| ERP29      | ENSG00000089248 | endoplasmic reticulum protein 29 [Source:HGNC Symbol;Acc:13799]                                   | 0.73 | 2.0E-07 |
| MOB1B      | ENSG00000173542 | MOB kinase activator 1B [Source:HGNC Symbol;Acc:29801]                                            | 1.77 | 2.0E-07 |
| KLHL3      | ENSG00000146021 | kelch-like family member 3 [Source:HGNC Symbol;Acc:6354]                                          | 2.26 | 2.0E-07 |
| ZNF594     | ENSG00000180626 | zinc finger protein 594 [Source:HGNC Symbol;Acc:29392]                                            | 1.94 | 2.1E-07 |
| --         | ENSG00000261572 | --                                                                                                | 1.51 | 2.2E-07 |
| ZBTB25     | ENSG00000089775 | zinc finger and BTB domain containing 25 [Source:HGNC Symbol;Acc:13112]                           | 1.11 | 2.2E-07 |
| KCNJ3      | ENSG00000162989 | potassium inwardly-rectifying channel, subfamily J, member 3 [Source:HGNC Symbol;Acc:6264]        | 3.26 | 2.2E-07 |
| HHEX       | ENSG00000152804 | hematopoietically expressed homeobox [Source:HGNC Symbol;Acc:4901]                                | 1.81 | 2.2E-07 |
| TMEM218    | ENSG00000150433 | transmembrane protein 218 [Source:HGNC Symbol;Acc:27344]                                          | 1.20 | 2.2E-07 |
| FAM222A-AS | ENSG00000255650 | FAM222A antisense RNA 1 [Source:HGNC Symbol;Acc:28223]                                            | 3.85 | 2.3E-07 |
| EIF2AK4    | ENSG00000128829 | eukaryotic translation initiation factor 2 alpha kinase 4 [Source:HGNC Symbol;Acc:19687]          | 0.89 | 2.3E-07 |
| ELP6       | ENSG00000163832 | elongator acetyltransferase complex subunit 6 [Source:HGNC Symbol;Acc:25976]                      | 0.90 | 2.3E-07 |
| --         | ENSG00000228302 | --                                                                                                | 0.84 | 2.4E-07 |
| CCDC40     | ENSG00000141519 | coiled-coil domain containing 40 [Source:HGNC Symbol;Acc:26090]                                   | 2.38 | 2.4E-07 |
| PARS2      | ENSG00000162396 | prolyl-tRNA synthetase 2, mitochondrial (putative) [Source:HGNC Symbol;Acc:30563]                 | 1.20 | 2.4E-07 |
| RAB23      | ENSG00000112210 | RAB23, member RAS oncogene family [Source:HGNC Symbol;Acc:14263]                                  | 1.43 | 2.4E-07 |
| B3GNTL1    | ENSG00000175711 | UDP-GlcNAc:betaGal beta-1,3-N-acetylglucosaminyltransferase-like 1 [Source:HGNC Symbol;Acc:21727] | 1.35 | 2.4E-07 |
| MMP11      | ENSG00000099953 | matrix metalloproteinase 11 (stromelysin 3) [Source:HGNC Symbol;Acc:7157]                         | 2.46 | 2.5E-07 |
| NUP205     | ENSG00000155561 | nucleoporin 205kDa [Source:HGNC Symbol;Acc:18658]                                                 | 0.83 | 2.5E-07 |

|          |                 |                                                                                             |      |         |
|----------|-----------------|---------------------------------------------------------------------------------------------|------|---------|
| SUMF2    | ENSG00000129103 | sulfatase modifying factor 2 [Source:HGNC Symbol;Acc:20415]                                 | 0.70 | 2.6E-07 |
| PRDX4    | ENSG00000123131 | peroxiredoxin 4 [Source:HGNC Symbol;Acc:17169]                                              | 0.70 | 2.6E-07 |
| GAS5-AS1 | ENSG00000270084 | GAS5 antisense RNA 1 [Source:HGNC Symbol;Acc:44119]                                         | 1.28 | 2.6E-07 |
| CHCHD6   | ENSG00000159685 | coiled-coil-helix-coiled-coil-helix domain containing 6 [Source:HGNC Symbol;Acc:28184]      | 1.72 | 2.6E-07 |
| IRAK1BP1 | ENSG00000146243 | interleukin-1 receptor-associated kinase 1 binding protein 1 [Source:HGNC Symbol;Acc:17368] | 1.46 | 2.6E-07 |
| NAT14    | ENSG00000090971 | N-acetyltransferase 14 (GCN5-related, putative) [Source:HGNC Symbol;Acc:28918]              | 1.42 | 2.6E-07 |
| LZTFL1   | ENSG00000163818 | leucine zipper transcription factor-like 1 [Source:HGNC Symbol;Acc:6741]                    | 1.20 | 2.6E-07 |
| DHX37    | ENSG00000150990 | DEAH (Asp-Glu-Ala-His) box polypeptide 37 [Source:HGNC Symbol;Acc:17210]                    | 1.34 | 2.7E-07 |
| RNMTL1   | ENSG00000171861 | RNA methyltransferase like 1 [Source:HGNC Symbol;Acc:18485]                                 | 1.26 | 2.7E-07 |
| ARSK     | ENSG00000164291 | arylsulfatase family, member K [Source:HGNC Symbol;Acc:25239]                               | 1.66 | 2.7E-07 |
| XPNPEP3  | ENSG00000196236 | X-prolyl aminopeptidase (aminopeptidase P) 3, putative [Source:HGNC Symbol;Acc:28052]       | 0.99 | 2.7E-07 |
| C1orf216 | ENSG00000142686 | chromosome 1 open reading frame 216 [Source:HGNC Symbol;Acc:26800]                          | 2.22 | 2.8E-07 |
| N6AMT2   | ENSG00000150456 | N-6 adenine-specific DNA methyltransferase 2 (putative) [Source:HGNC Symbol;Acc:27351]      | 2.02 | 2.8E-07 |
| --       | ENSG00000244380 | --                                                                                          | 1.10 | 2.8E-07 |
| MGST1    | ENSG00000008394 | microsomal glutathione S-transferase 1 [Source:HGNC Symbol;Acc:7061]                        | 0.98 | 2.9E-07 |
| --       | ENSG00000267288 | --                                                                                          | 1.38 | 2.9E-07 |
| NIFK     | ENSG00000155438 | nucleolar protein interacting with the FHA domain of MKI67 [Source:HGNC Symbol;Acc:17838]   | 1.01 | 2.9E-07 |
| SUCLG1   | ENSG00000163541 | succinate-CoA ligase, alpha subunit [Source:HGNC Symbol;Acc:11449]                          | 0.61 | 2.9E-07 |

|         |                 |                                                                                                            |      |         |
|---------|-----------------|------------------------------------------------------------------------------------------------------------|------|---------|
| NPL     | ENSG00000135838 | N-acetylneuraminase pyruvate lyase (dihydrodipicolinate synthase) [Source:HGNC Symbol;Acc:16781]           | 1.49 | 2.9E-07 |
| ARL17A  | ENSG00000185829 | ADP-ribosylation factor-like 17A [Source:HGNC Symbol;Acc:24096]                                            | 1.01 | 2.9E-07 |
| ALYREF  | ENSG00000183684 | Aly/REF export factor [Source:HGNC Symbol;Acc:19071]                                                       | 1.15 | 3.0E-07 |
| MYEOV2  | ENSG00000172428 | myeloma overexpressed 2 [Source:HGNC Symbol;Acc:21314]                                                     | 0.92 | 3.0E-07 |
| IL1RL2  | ENSG00000115598 | interleukin 1 receptor-like 2 [Source:HGNC Symbol;Acc:5999]                                                | 1.51 | 3.0E-07 |
| MRPS12  | ENSG00000128626 | mitochondrial ribosomal protein S12 [Source:HGNC Symbol;Acc:10380]                                         | 1.26 | 3.0E-07 |
| PRKRA   | ENSG00000180228 | protein kinase, interferon-inducible double stranded RNA dependent activator [Source:HGNC Symbol;Acc:9438] | 0.87 | 3.1E-07 |
| RECQL4  | ENSG00000160957 | RecQ protein-like 4 [Source:HGNC Symbol;Acc:9949]                                                          | 2.41 | 3.1E-07 |
| PET112  | ENSG00000059691 | PET112 homolog (yeast) [Source:HGNC Symbol;Acc:8849]                                                       | 1.07 | 3.1E-07 |
| PES1    | ENSG00000100029 | pescadillo ribosomal biogenesis factor 1 [Source:HGNC Symbol;Acc:8848]                                     | 0.97 | 3.1E-07 |
| RP9     | ENSG00000164610 | retinitis pigmentosa 9 (autosomal dominant) [Source:HGNC Symbol;Acc:10288]                                 | 1.18 | 3.1E-07 |
| DDX21   | ENSG00000165732 | DEAD (Asp-Glu-Ala-Asp) box helicase 21 [Source:HGNC Symbol;Acc:2744]                                       | 1.19 | 3.2E-07 |
| --      | ENSG00000254578 | --                                                                                                         | 1.21 | 3.2E-07 |
| METTL2B | ENSG00000165055 | methyltransferase like 2B [Source:HGNC Symbol;Acc:18272]                                                   | 0.76 | 3.2E-07 |
| RPL37   | ENSG00000145592 | ribosomal protein L37 [Source:HGNC Symbol;Acc:10347]                                                       | 0.94 | 3.2E-07 |
| HEATR2  | ENSG00000164818 | HEAT repeat containing 2 [Source:HGNC Symbol;Acc:26013]                                                    | 0.66 | 3.2E-07 |
| LPCAT1  | ENSG00000153395 | lysophosphatidylcholine acyltransferase 1 [Source:HGNC Symbol;Acc:25718]                                   | 0.93 | 3.2E-07 |
| RPS5    | ENSG00000083845 | ribosomal protein S5 [Source:HGNC Symbol;Acc:10426]                                                        | 0.98 | 3.3E-07 |
| METTL5  | ENSG00000138382 | methyltransferase like 5 [Source:HGNC Symbol;Acc:25006]                                                    | 0.95 | 3.3E-07 |
| EDRF1   | ENSG00000107938 | erythroid differentiation regulatory factor 1 [Source:HGNC Symbol;Acc:24640]                               | 1.06 | 3.4E-07 |

|          |                 |                                                                                                             |      |         |
|----------|-----------------|-------------------------------------------------------------------------------------------------------------|------|---------|
| REV3L    | ENSG00000009413 | REV3-like, polymerase (DNA directed), zeta, catalytic subunit [Source:HGNC Symbol;Acc:9968]                 | 0.93 | 3.4E-07 |
| METTL8   | ENSG00000123600 | methyltransferase like 8 [Source:HGNC Symbol;Acc:25856]                                                     | 1.31 | 3.5E-07 |
| ALG6     | ENSG00000088035 | ALG6, alpha-1,3-glucosyltransferase [Source:HGNC Symbol;Acc:23157]                                          | 1.14 | 3.5E-07 |
| ENOSF1   | ENSG00000132199 | enolase superfamily member 1 [Source:HGNC Symbol;Acc:30365]                                                 | 0.92 | 3.6E-07 |
| MRPL42   | ENSG00000198015 | mitochondrial ribosomal protein L42 [Source:HGNC Symbol;Acc:14493]                                          | 0.93 | 3.6E-07 |
| ZNF740   | ENSG00000139651 | zinc finger protein 740 [Source:HGNC Symbol;Acc:27465]                                                      | 0.92 | 3.7E-07 |
| DTWD1    | ENSG00000104047 | DTW domain containing 1 [Source:HGNC Symbol;Acc:30926]                                                      | 1.22 | 3.7E-07 |
| MAATS1   | ENSG00000183833 | MYCBP-associated, testis expressed 1 [Source:HGNC Symbol;Acc:24010]                                         | 1.23 | 3.7E-07 |
| THOC1    | ENSG00000079134 | THO complex 1 [Source:HGNC Symbol;Acc:19070]                                                                | 1.19 | 3.8E-07 |
| ASNSD1   | ENSG00000138381 | asparagine synthetase domain containing 1 [Source:HGNC Symbol;Acc:24910]                                    | 0.99 | 3.8E-07 |
| IMMT     | ENSG00000132305 | inner membrane protein, mitochondrial [Source:HGNC Symbol;Acc:6047]                                         | 0.67 | 3.9E-07 |
| CNOT10   | ENSG00000182973 | CCR4-NOT transcription complex, subunit 10 [Source:HGNC Symbol;Acc:23817]                                   | 0.83 | 3.9E-07 |
| SLC38A5  | ENSG00000017483 | solute carrier family 38, member 5 [Source:HGNC Symbol;Acc:18070]                                           | 0.97 | 3.9E-07 |
| --       | ENSG00000270081 | --                                                                                                          | 1.32 | 4.0E-07 |
| UNC93A   | ENSG00000112494 | unc-93 homolog A (C. elegans) [Source:HGNC Symbol;Acc:12570]                                                | 1.91 | 4.0E-07 |
| AHSA1    | ENSG00000100591 | AHA1, activator of heat shock 90kDa protein ATPase homolog 1 (yeast) [Source:HGNC Symbol;Acc:1189]          | 0.71 | 4.1E-07 |
| MCIDAS   | ENSG00000234602 | multiciliate differentiation and DNA synthesis associated cell cycle protein [Source:HGNC Symbol;Acc:40050] | 2.13 | 4.1E-07 |
| C22orf39 | ENSG00000242259 | chromosome 22 open reading frame 39 [Source:HGNC Symbol;Acc:27012]                                          | 1.02 | 4.1E-07 |

|          |                 |                                                                                                                 |      |         |
|----------|-----------------|-----------------------------------------------------------------------------------------------------------------|------|---------|
| ATF7IP2  | ENSG00000166669 | activating transcription factor 7 interacting protein 2 [Source:HGNC Symbol;Acc:20397]                          | 1.50 | 4.2E-07 |
| AKR1C4   | ENSG00000198610 | aldo-keto reductase family 1, member C4 [Source:HGNC Symbol;Acc:387]                                            | 1.38 | 4.3E-07 |
| SLC2A11  | ENSG00000133460 | solute carrier family 2 (facilitated glucose transporter), member 11 [Source:HGNC Symbol;Acc:14239]             | 1.47 | 4.4E-07 |
| FH       | ENSG00000091483 | fumarate hydratase [Source:HGNC Symbol;Acc:3700]                                                                | 0.78 | 4.4E-07 |
| CCND1    | ENSG00000110092 | cyclin D1 [Source:HGNC Symbol;Acc:1582]                                                                         | 0.78 | 4.4E-07 |
| CDC123   | ENSG00000151465 | cell division cycle 123 [Source:HGNC Symbol;Acc:16827]                                                          | 0.84 | 4.4E-07 |
| CDK20    | ENSG00000156345 | cyclin-dependent kinase 20 [Source:HGNC Symbol;Acc:21420]                                                       | 1.69 | 4.5E-07 |
| --       | ENSG00000245385 | --                                                                                                              | 1.11 | 4.5E-07 |
| NDUFS5   | ENSG00000168653 | NADH dehydrogenase (ubiquinone) Fe-S protein 5, 15kDa (NADH-coenzyme Q reductase) [Source:HGNC Symbol;Acc:7712] | 0.74 | 4.5E-07 |
| HMG3-AS1 | ENSG00000270362 | HMG3 antisense RNA 1 [Source:HGNC Symbol;Acc:48984]                                                             | 2.82 | 4.6E-07 |
| CEBPZ    | ENSG00000115816 | CCAAT/enhancer binding protein (C/EBP), zeta [Source:HGNC Symbol;Acc:24218]                                     | 1.00 | 4.6E-07 |
| PHF5A    | ENSG00000100410 | PHD finger protein 5A [Source:HGNC Symbol;Acc:18000]                                                            | 0.78 | 4.6E-07 |
| ASXL1    | ENSG00000171456 | additional sex combs like 1 (Drosophila) [Source:HGNC Symbol;Acc:18318]                                         | 0.69 | 4.6E-07 |
| SET      | ENSG00000119335 | SET nuclear oncogene [Source:HGNC Symbol;Acc:10760]                                                             | 0.91 | 4.8E-07 |
| ZFP90    | ENSG00000184939 | ZFP90 zinc finger protein [Source:HGNC Symbol;Acc:23329]                                                        | 1.16 | 4.8E-07 |
| --       | ENSG00000248408 | --                                                                                                              | 3.57 | 4.9E-07 |
| TEAD4    | ENSG00000197905 | TEA domain family member 4 [Source:HGNC Symbol;Acc:11717]                                                       | 1.36 | 5.0E-07 |
| WDR35    | ENSG00000118965 | WD repeat domain 35 [Source:HGNC Symbol;Acc:29250]                                                              | 1.98 | 5.1E-07 |
| GPR19    | ENSG00000183150 | G protein-coupled receptor 19 [Source:HGNC Symbol;Acc:4473]                                                     | 3.25 | 5.1E-07 |
| ADRA2C   | ENSG00000184160 | adrenoceptor alpha 2C [Source:HGNC Symbol;Acc:283]                                                              | 3.24 | 5.1E-07 |
| L3MBTL2  | ENSG00000100395 | l(3)mbt-like 2 (Drosophila) [Source:HGNC Symbol;Acc:18594]                                                      | 0.79 | 5.2E-07 |
| RTN4IP1  | ENSG00000130347 | reticulon 4 interacting protein 1 [Source:HGNC Symbol;Acc:18647]                                                | 1.24 | 5.2E-07 |

|         |                 |                                                                                                    |      |         |
|---------|-----------------|----------------------------------------------------------------------------------------------------|------|---------|
| ANP32B  | ENSG00000136938 | acidic (leucine-rich) nuclear phosphoprotein 32 family, member B<br>[Source:HGNC Symbol;Acc:16677] | 0.95 | 5.2E-07 |
| --      | ENSG00000230124 | --                                                                                                 | 1.29 | 5.3E-07 |
| MRPL45  | ENSG00000174100 | mitochondrial ribosomal protein L45 [Source:HGNC<br>Symbol;Acc:16651]                              | 0.92 | 5.4E-07 |
| L2HGDH  | ENSG00000087299 | L-2-hydroxyglutarate dehydrogenase [Source:HGNC<br>Symbol;Acc:20499]                               | 1.54 | 5.4E-07 |
| DNAJC11 | ENSG00000007923 | DnaJ (Hsp40) homolog, subfamily C, member 11 [Source:HGNC<br>Symbol;Acc:25570]                     | 0.82 | 5.4E-07 |
| APITD1  | ENSG00000175279 | apoptosis-inducing, TAF9-like domain 1 [Source:HGNC<br>Symbol;Acc:23163]                           | 1.49 | 5.6E-07 |
| TFR2    | ENSG00000106327 | transferrin receptor 2 [Source:HGNC Symbol;Acc:11762]                                              | 1.90 | 5.6E-07 |
| YARS2   | ENSG00000139131 | tyrosyl-tRNA synthetase 2, mitochondrial [Source:HGNC<br>Symbol;Acc:24249]                         | 0.89 | 5.6E-07 |
| ZNF37BP | ENSG00000234420 | zinc finger protein 37B, pseudogene [Source:HGNC<br>Symbol;Acc:13103]                              | 1.41 | 5.7E-07 |
| SHF     | ENSG00000138606 | Src homology 2 domain containing F [Source:HGNC<br>Symbol;Acc:25116]                               | 1.91 | 5.7E-07 |
| GRIN1   | ENSG00000176884 | glutamate receptor, ionotropic, N-methyl D-aspartate 1<br>[Source:HGNC Symbol;Acc:4584]            | 1.60 | 5.8E-07 |
| HNMT    | ENSG00000150540 | histamine N-methyltransferase [Source:HGNC Symbol;Acc:5028]                                        | 0.95 | 5.9E-07 |
| ATG3    | ENSG00000144848 | autophagy related 3 [Source:HGNC Symbol;Acc:20962]                                                 | 0.86 | 5.9E-07 |
| NHLRC3  | ENSG00000188811 | NHL repeat containing 3 [Source:HGNC Symbol;Acc:33751]                                             | 1.21 | 6.0E-07 |
| DMC1    | ENSG00000100206 | DNA meiotic recombinase 1 [Source:HGNC Symbol;Acc:2927]                                            | 3.75 | 6.1E-07 |
| ALOX15  | ENSG00000161905 | arachidonate 15-lipoxygenase [Source:HGNC Symbol;Acc:433]                                          | 2.79 | 6.2E-07 |
| NUDT15  | ENSG00000136159 | nudix (nucleoside diphosphate linked moiety X)-type motif 15<br>[Source:HGNC Symbol;Acc:23063]     | 0.93 | 6.2E-07 |
| POLR2K  | ENSG00000147669 | polymerase (RNA) II (DNA directed) polypeptide K, 7.0kDa<br>[Source:HGNC Symbol;Acc:9198]          | 0.86 | 6.2E-07 |

|          |                 |                                                                                                             |      |         |
|----------|-----------------|-------------------------------------------------------------------------------------------------------------|------|---------|
| --       | ENSG00000256546 | --                                                                                                          | 1.90 | 6.3E-07 |
| ZBTB2    | ENSG00000181472 | zinc finger and BTB domain containing 2 [Source:HGNC Symbol;Acc:20868]                                      | 0.94 | 6.3E-07 |
| LAGE3    | ENSG00000196976 | L antigen family, member 3 [Source:HGNC Symbol;Acc:26058]                                                   | 1.30 | 6.3E-07 |
| SCML2    | ENSG00000102098 | sex comb on midleg-like 2 (Drosophila) [Source:HGNC Symbol;Acc:10581]                                       | 3.55 | 6.4E-07 |
| TRMT6    | ENSG00000089195 | tRNA methyltransferase 6 homolog (S. cerevisiae) [Source:HGNC Symbol;Acc:20900]                             | 0.86 | 6.4E-07 |
| PCMTD2   | ENSG00000203880 | protein-L-isoaspartate (D-aspartate) O-methyltransferase domain containing 2 [Source:HGNC Symbol;Acc:15882] | 0.97 | 6.5E-07 |
| HNRNPM   | ENSG00000099783 | heterogeneous nuclear ribonucleoprotein M [Source:HGNC Symbol;Acc:5046]                                     | 0.73 | 6.5E-07 |
| ZNF793   | ENSG00000188227 | zinc finger protein 793 [Source:HGNC Symbol;Acc:33115]                                                      | 1.41 | 6.5E-07 |
| MAGOH    | ENSG00000162385 | mag0-nashi homolog, proliferation-associated (Drosophila) [Source:HGNC Symbol;Acc:6815]                     | 0.88 | 6.6E-07 |
| B9D1     | ENSG00000108641 | B9 protein domain 1 [Source:HGNC Symbol;Acc:24123]                                                          | 1.26 | 6.6E-07 |
| STX6     | ENSG00000135823 | syntaxin 6 [Source:HGNC Symbol;Acc:11441]                                                                   | 0.78 | 6.7E-07 |
| SCAMP3   | ENSG00000116521 | secretory carrier membrane protein 3 [Source:HGNC Symbol;Acc:10565]                                         | 1.08 | 6.8E-07 |
| TOMM20L  | ENSG00000196860 | translocase of outer mitochondrial membrane 20 homolog (yeast)-like [Source:HGNC Symbol;Acc:33752]          | 2.23 | 6.8E-07 |
| --       | ENSG00000216895 | Protein LOC100506302 [Source:UniProtKB/TrEMBL;Acc:B5MCR4]                                                   | 1.45 | 6.8E-07 |
| C7orf50  | ENSG00000146540 | chromosome 7 open reading frame 50 [Source:HGNC Symbol;Acc:22421]                                           | 1.32 | 6.9E-07 |
| C19orf54 | ENSG00000188493 | chromosome 19 open reading frame 54 [Source:HGNC Symbol;Acc:24758]                                          | 0.95 | 6.9E-07 |
| TOMM34   | ENSG00000025772 | translocase of outer mitochondrial membrane 34 [Source:HGNC Symbol;Acc:15746]                               | 0.80 | 6.9E-07 |
| --       | ENSG00000263272 | --                                                                                                          | 1.12 | 6.9E-07 |

|          |                 |                                                                                                                           |      |         |
|----------|-----------------|---------------------------------------------------------------------------------------------------------------------------|------|---------|
| DEK      | ENSG00000124795 | DEK oncogene [Source:HGNC Symbol;Acc:2768]<br>neuropilin (NRP) and tolloid (TLL)-like 2 [Source:HGNC<br>Symbol;Acc:14644] | 1.20 | 7.0E-07 |
| NETO2    | ENSG00000171208 | WD repeat domain 90 [Source:HGNC Symbol;Acc:26960]                                                                        | 1.34 | 7.0E-07 |
| WDR90    | ENSG00000161996 | nephronophthisis 1 (juvenile) [Source:HGNC Symbol;Acc:7905]                                                               | 1.15 | 7.0E-07 |
| NPHP1    | ENSG00000144061 | aldehyde dehydrogenase 3 family, member A2 [Source:HGNC<br>Symbol;Acc:403]                                                | 3.37 | 7.0E-07 |
| ALDH3A2  | ENSG00000072210 | translation machinery associated 16 homolog ( <i>S. cerevisiae</i> )<br>[Source:HGNC Symbol;Acc:25638]                    | 0.77 | 7.1E-07 |
| TMA16    | ENSG00000198498 | oxoglutarate (alpha-ketoglutarate) receptor 1 [Source:HGNC<br>Symbol;Acc:4531]                                            | 1.32 | 7.1E-07 |
| OXGR1    | ENSG00000165621 | chromosome 9 open reading frame 129 [Source:HGNC<br>Symbol;Acc:31116]                                                     | 3.74 | 7.2E-07 |
| C9orf129 | ENSG00000204352 | septin 6 [Source:HGNC Symbol;Acc:15848]                                                                                   | 1.05 | 7.4E-07 |
| SEPT6    | ENSG00000125354 | nei endonuclease VIII-like 1 ( <i>E. coli</i> ) [Source:HGNC Symbol;Acc:18448]                                            | 1.01 | 7.4E-07 |
| NEIL1    | ENSG00000140398 | elongator acetyltransferase complex subunit 4 [Source:HGNC<br>Symbol;Acc:1171]                                            | 1.14 | 7.4E-07 |
| ELP4     | ENSG00000109911 | selenophosphate synthetase 2 [Source:HGNC Symbol;Acc:19686]                                                               | 1.03 | 7.5E-07 |
| SEPHS2   | ENSG00000179918 | B-cell CLL/lymphoma 9 [Source:HGNC Symbol;Acc:1008]                                                                       | 0.68 | 7.6E-07 |
| BCL9     | ENSG00000116128 | peptidylprolyl isomerase (cyclophilin)-like 3 [Source:HGNC<br>Symbol;Acc:9262]                                            | 1.01 | 7.7E-07 |
| PPIL3    | ENSG00000240344 | nucleoporin 188kDa [Source:HGNC Symbol;Acc:17859]                                                                         | 0.92 | 7.7E-07 |
| NUP188   | ENSG00000095319 | ankyrin repeat domain 36 [Source:HGNC Symbol;Acc:24079]                                                                   | 0.79 | 7.8E-07 |
| ANKRD36  | ENSG00000135976 | --                                                                                                                        | 1.49 | 7.8E-07 |
| --       | ENSG00000224272 | --                                                                                                                        | 1.09 | 7.8E-07 |
| RBL1     | ENSG00000080839 | retinoblastoma-like 1 (p107) [Source:HGNC Symbol;Acc:9893]                                                                | 0.85 | 7.9E-07 |
| --       | ENSG00000242479 | --                                                                                                                        | 1.59 | 8.0E-07 |
| SELENBP1 | ENSG00000143416 | selenium binding protein 1 [Source:HGNC Symbol;Acc:10719]                                                                 | 0.90 | 8.0E-07 |



|            |                 |                                                                                                        |      |         |
|------------|-----------------|--------------------------------------------------------------------------------------------------------|------|---------|
| SLC35G1    | ENSG00000176273 | solute carrier family 35, member G1 [Source:HGNC Symbol;Acc:26607]                                     | 1.24 | 8.1E-07 |
| RPS19      | ENSG00000105372 | ribosomal protein S19 [Source:HGNC Symbol;Acc:10402]                                                   | 1.02 | 8.1E-07 |
| CPS1       | ENSG00000021826 | carbamoyl-phosphate synthase 1, mitochondrial [Source:HGNC Symbol;Acc:2323]                            | 2.34 | 8.1E-07 |
| CCT3       | ENSG00000163468 | chaperonin containing TCP1, subunit 3 (gamma) [Source:HGNC Symbol;Acc:1616]                            | 0.73 | 8.2E-07 |
| GSTCD      | ENSG00000138780 | glutathione S-transferase, C-terminal domain containing [Source:HGNC Symbol;Acc:25806]                 | 1.32 | 8.3E-07 |
| BCL11B     | ENSG00000127152 | B-cell CLL/lymphoma 11B (zinc finger protein) [Source:HGNC Symbol;Acc:13222]                           | 1.56 | 8.3E-07 |
| --         | ENSG00000260206 | --                                                                                                     | 1.07 | 8.3E-07 |
| --         | ENSG00000236452 | --                                                                                                     | 3.71 | 8.4E-07 |
| USP39      | ENSG00000168883 | ubiquitin specific peptidase 39 [Source:HGNC Symbol;Acc:20071]                                         | 0.62 | 8.4E-07 |
| HMG5       | ENSG00000198157 | high mobility group nucleosome binding domain 5 [Source:HGNC Symbol;Acc:8013]                          | 3.09 | 8.5E-07 |
| WDR91      | ENSG00000105875 | WD repeat domain 91 [Source:HGNC Symbol;Acc:24997]                                                     | 1.38 | 8.6E-07 |
| SKA2       | ENSG00000182628 | spindle and kinetochore associated complex subunit 2 [Source:HGNC Symbol;Acc:28006]                    | 1.06 | 8.6E-07 |
| SPATA3-AS1 | ENSG00000238062 | SPATA3 antisense RNA 1 (head to head) [Source:HGNC Symbol;Acc:28013]                                   | 2.95 | 8.6E-07 |
| RPS6KL1    | ENSG00000198208 | ribosomal protein S6 kinase-like 1 [Source:HGNC Symbol;Acc:20222]                                      | 0.91 | 8.7E-07 |
| FKTN       | ENSG00000106692 | fukutin [Source:HGNC Symbol;Acc:3622]                                                                  | 1.31 | 8.7E-07 |
| UTP3       | ENSG00000132467 | UTP3, small subunit (SSU) processome component, homolog (S. cerevisiae) [Source:HGNC Symbol;Acc:24477] | 0.75 | 8.7E-07 |
| MDC1-AS1   | ENSG00000224328 | MDC1 antisense RNA 1 [Source:HGNC Symbol;Acc:39764]                                                    | 2.16 | 8.8E-07 |
| TP53       | ENSG00000141510 | tumor protein p53 [Source:HGNC Symbol;Acc:11998]                                                       | 1.00 | 8.8E-07 |
| --         | ENSG00000261008 | --                                                                                                     | 3.19 | 8.9E-07 |
| KDM1A      | ENSG00000004487 | lysine (K)-specific demethylase 1A [Source:HGNC Symbol;Acc:29079]                                      | 0.65 | 9.0E-07 |

|          |                 |                                                                                                                                     |      |         |
|----------|-----------------|-------------------------------------------------------------------------------------------------------------------------------------|------|---------|
| GAS6     | ENSG00000183087 | growth arrest-specific 6 [Source:HGNC Symbol;Acc:4168]<br>transmembrane and coiled-coil domains 6 [Source:HGNC<br>Symbol;Acc:28814] | 1.37 | 9.3E-07 |
| TMCO6    | ENSG00000113119 | tensin 4 [Source:HGNC Symbol;Acc:24352]                                                                                             | 0.90 | 9.3E-07 |
| TNS4     | ENSG00000131746 | TP73 antisense RNA 1 [Source:HGNC Symbol;Acc:29052]                                                                                 | 1.18 | 9.6E-07 |
| TP73-AS1 | ENSG00000227372 | solute carrier family 25 (mitochondrial carrier; ornithine transporter)<br>member 15 [Source:HGNC Symbol;Acc:10985]                 | 3.32 | 9.7E-07 |
| SLC25A15 | ENSG00000102743 | protein phosphatase, Mg <sup>2+</sup> /Mn <sup>2+</sup> dependent, 1G [Source:HGNC<br>Symbol;Acc:9278]                              | 1.53 | 9.7E-07 |
| PPM1G    | ENSG00000115241 | coiled-coil domain containing 18 [Source:HGNC Symbol;Acc:30370]                                                                     | 0.65 | 9.7E-07 |
| CCDC18   | ENSG00000122483 | HEN1 methyltransferase homolog 1 (Arabidopsis) [Source:HGNC<br>Symbol;Acc:26400]                                                    | 1.21 | 9.8E-07 |
| HENMT1   | ENSG00000162639 | testis specific, 10 [Source:HGNC Symbol;Acc:14927]                                                                                  | 0.98 | 9.8E-07 |
| TSGA10   | ENSG00000135951 | replication protein A1, 70kDa [Source:HGNC Symbol;Acc:10289]                                                                        | 1.75 | 1.0E-06 |
| RPA1     | ENSG00000132383 | family with sequence similarity 86, member B1 [Source:HGNC<br>Symbol;Acc:28268]                                                     | 0.93 | 1.0E-06 |
| FAM86B1  | ENSG00000186523 | dendrin [Source:HGNC Symbol;Acc:24458]                                                                                              | 1.22 | 1.0E-06 |
| DDN      | ENSG00000181418 | family with sequence similarity 227, member A [Source:HGNC<br>Symbol;Acc:44197]                                                     | 2.23 | 1.0E-06 |
| FAM227A  | ENSG00000184949 | MNX1 antisense RNA 1 (head to head) [Source:HGNC<br>Symbol;Acc:48954]                                                               | 2.32 | 1.0E-06 |
| MNX1-AS1 | ENSG00000243479 | --                                                                                                                                  | 2.79 | 1.0E-06 |
| --       | ENSG00000267194 | elongator acetyltransferase complex subunit 3 [Source:HGNC<br>Symbol;Acc:20696]                                                     | 2.02 | 1.1E-06 |
| ELP3     | ENSG00000134014 | --                                                                                                                                  | 1.06 | 1.1E-06 |
| --       | ENSG00000262482 | centrosomal protein 70kDa [Source:HGNC Symbol;Acc:29972]                                                                            | 1.73 | 1.1E-06 |
| CEP70    | ENSG00000114107 | 1-aminocyclopropane-1-carboxylate synthase homolog<br>(Arabidopsis)(non-functional) [Source:HGNC Symbol;Acc:23989]                  | 0.93 | 1.1E-06 |
| ACCS     | ENSG00000110455 | CD6 molecule [Source:HGNC Symbol;Acc:1691]                                                                                          | 1.44 | 1.1E-06 |
| CD6      | ENSG00000013725 |                                                                                                                                     | 3.50 | 1.1E-06 |

|           |                 |                                                                                                          |      |         |
|-----------|-----------------|----------------------------------------------------------------------------------------------------------|------|---------|
| SDHAF1    | ENSG00000205138 | succinate dehydrogenase complex assembly factor 1 [Source:HGNC Symbol;Acc:33867]                         | 1.19 | 1.1E-06 |
| MAN1A1    | ENSG00000111885 | mannosidase, alpha, class 1A, member 1 [Source:HGNC Symbol;Acc:6821]                                     | 2.01 | 1.1E-06 |
| NHLRC1    | ENSG00000187566 | NHL repeat containing E3 ubiquitin protein ligase 1 [Source:HGNC Symbol;Acc:21576]                       | 1.54 | 1.1E-06 |
| LRRC24    | ENSG00000254402 | leucine rich repeat containing 24 [Source:HGNC Symbol;Acc:28947]                                         | 1.13 | 1.1E-06 |
| TFB1M     | ENSG00000029639 | transcription factor B1, mitochondrial [Source:HGNC Symbol;Acc:17037]                                    | 0.91 | 1.1E-06 |
| COA7      | ENSG00000162377 | cytochrome c oxidase assembly factor 7 [Source:HGNC Symbol;Acc:25716]                                    | 0.94 | 1.1E-06 |
| IMMP1L    | ENSG00000148950 | IMP1 inner mitochondrial membrane peptidase-like ( <i>S. cerevisiae</i> ) [Source:HGNC Symbol;Acc:26317] | 0.97 | 1.1E-06 |
| DPF1      | ENSG00000011332 | D4, zinc and double PHD fingers family 1 [Source:HGNC Symbol;Acc:20225]                                  | 1.93 | 1.1E-06 |
| --        | ENSG00000214999 | --                                                                                                       | 2.46 | 1.1E-06 |
| C19orf44  | ENSG00000105072 | chromosome 19 open reading frame 44 [Source:HGNC Symbol;Acc:26141]                                       | 0.79 | 1.1E-06 |
| ADO       | ENSG00000181915 | 2-aminoethanethiol (cysteamine) dioxygenase [Source:HGNC Symbol;Acc:23506]                               | 1.05 | 1.1E-06 |
| SMYD3     | ENSG00000185420 | SET and MYND domain containing 3 [Source:HGNC Symbol;Acc:15513]                                          | 1.07 | 1.2E-06 |
| --        | ENSG00000258525 | --                                                                                                       | 2.53 | 1.2E-06 |
| SNHG18    | ENSG00000250786 | small nucleolar RNA host gene 18 (non-protein coding) [Source:HGNC Symbol;Acc:49007]                     | 1.06 | 1.2E-06 |
| ARMC10    | ENSG00000170632 | armadillo repeat containing 10 [Source:HGNC Symbol;Acc:21706]                                            | 0.79 | 1.2E-06 |
| LINC01123 | ENSG00000204588 | long intergenic non-protein coding RNA 1123 [Source:HGNC Symbol;Acc:49269]                               | 1.32 | 1.2E-06 |

|            |                 |                                                                                                   |      |         |
|------------|-----------------|---------------------------------------------------------------------------------------------------|------|---------|
| BRMS1L     | ENSG00000100916 | breast cancer metastasis-suppressor 1-like [Source:HGNC Symbol;Acc:20512]                         | 1.46 | 1.2E-06 |
| GAPDHS     | ENSG00000105679 | glyceraldehyde-3-phosphate dehydrogenase, spermatogenic [Source:HGNC Symbol;Acc:24864]            | 2.41 | 1.2E-06 |
| SOX1       | ENSG00000182968 | SRY (sex determining region Y)-box 1 [Source:HGNC Symbol;Acc:11189]                               | 3.18 | 1.2E-06 |
| PDK2       | ENSG00000005882 | pyruvate dehydrogenase kinase, isozyme 2 [Source:HGNC Symbol;Acc:8810]                            | 1.14 | 1.2E-06 |
| ATP6V0E2-A | ENSG00000204934 | ATP6V0E2 antisense RNA 1 [Source:HGNC Symbol;Acc:44180]                                           | 1.69 | 1.2E-06 |
| GATA6-AS1  | ENSG00000266010 | GATA6 antisense RNA 1 (head to head) [Source:HGNC Symbol;Acc:48840]                               | 1.41 | 1.2E-06 |
| ASPHD1     | ENSG00000174939 | aspartate beta-hydroxylase domain containing 1 [Source:HGNC Symbol;Acc:27380]                     | 1.09 | 1.2E-06 |
| EIF2B1     | ENSG00000111361 | eukaryotic translation initiation factor 2B, subunit 1 alpha, 26kDa [Source:HGNC Symbol;Acc:3257] | 0.67 | 1.2E-06 |
| LHFPL5     | ENSG00000197753 | lipoma HMGIC fusion partner-like 5 [Source:HGNC Symbol;Acc:21253]                                 | 0.83 | 1.3E-06 |
| SULT1C4    | ENSG00000198075 | sulfotransferase family, cytosolic, 1C, member 4 [Source:HGNC Symbol;Acc:11457]                   | 2.99 | 1.3E-06 |
| SPATC1L    | ENSG00000160284 | spermatogenesis and centriole associated 1-like [Source:HGNC Symbol;Acc:1298]                     | 1.94 | 1.3E-06 |
| LTA4H      | ENSG00000111144 | leukotriene A4 hydrolase [Source:HGNC Symbol;Acc:6710]                                            | 0.84 | 1.3E-06 |
| --         | ENSG00000254433 | --                                                                                                | 1.26 | 1.4E-06 |
| RPE        | ENSG00000197713 | ribulose-5-phosphate-3-epimerase [Source:HGNC Symbol;Acc:10293]                                   | 0.90 | 1.4E-06 |
| PMS2P1     | ENSG00000078319 | postmeiotic segregation increased 2 pseudogene 1 [Source:HGNC Symbol;Acc:9123]                    | 1.09 | 1.4E-06 |
| ACTR5      | ENSG00000101442 | ARP5 actin-related protein 5 homolog (yeast) [Source:HGNC Symbol;Acc:14671]                       | 0.86 | 1.4E-06 |
| COL27A1    | ENSG00000196739 | collagen, type XXVII, alpha 1 [Source:HGNC Symbol;Acc:22986]                                      | 1.74 | 1.4E-06 |

|           |                 |                                                                                                   |      |         |
|-----------|-----------------|---------------------------------------------------------------------------------------------------|------|---------|
| NCBP2-AS2 | ENSG00000270170 | NCBP2 antisense RNA 2 (head to head) [Source:HGNC Symbol;Acc:25121]                               | 1.10 | 1.4E-06 |
| WRB       | ENSG00000182093 | tryptophan rich basic protein [Source:HGNC Symbol;Acc:12790]                                      | 1.18 | 1.4E-06 |
| CHCHD7    | ENSG00000170791 | coiled-coil-helix-coiled-coil-helix domain containing 7 [Source:HGNC Symbol;Acc:28314]            | 0.80 | 1.5E-06 |
| EMC1      | ENSG00000127463 | ER membrane protein complex subunit 1 [Source:HGNC Symbol;Acc:28957]                              | 0.76 | 1.5E-06 |
| SHPRH     | ENSG00000146414 | SNF2 histone linker PHD RING helicase, E3 ubiquitin protein ligase [Source:HGNC Symbol;Acc:19336] | 1.01 | 1.5E-06 |
| PAXBP1    | ENSG00000159086 | PAX3 and PAX7 binding protein 1 [Source:HGNC Symbol;Acc:13579]                                    | 0.98 | 1.5E-06 |
| RPS21     | ENSG00000171858 | ribosomal protein S21 [Source:HGNC Symbol;Acc:10409]                                              | 0.94 | 1.5E-06 |
| ARHGAP33  | ENSG00000004777 | Rho GTPase activating protein 33 [Source:HGNC Symbol;Acc:23085]                                   | 2.01 | 1.6E-06 |
| C11orf48  | ENSG00000162194 | chromosome 11 open reading frame 48 [Source:HGNC Symbol;Acc:28351]                                | 0.80 | 1.6E-06 |
| ZNF572    | ENSG00000180938 | zinc finger protein 572 [Source:HGNC Symbol;Acc:26758]                                            | 1.72 | 1.6E-06 |
| ZNF215    | ENSG00000149054 | zinc finger protein 215 [Source:HGNC Symbol;Acc:13007]                                            | 1.04 | 1.6E-06 |
| POLB      | ENSG00000070501 | polymerase (DNA directed), beta [Source:HGNC Symbol;Acc:9174]                                     | 0.76 | 1.7E-06 |
| CCAR1     | ENSG00000060339 | cell division cycle and apoptosis regulator 1 [Source:HGNC Symbol;Acc:24236]                      | 0.88 | 1.7E-06 |
| TERT      | ENSG00000164362 | telomerase reverse transcriptase [Source:HGNC Symbol;Acc:11730]                                   | 3.46 | 1.7E-06 |
| XRCC6BP1  | ENSG00000166896 | XRCC6 binding protein 1 [Source:HGNC Symbol;Acc:29452]                                            | 1.24 | 1.7E-06 |
| --        | ENSG00000259081 | --                                                                                                | 2.51 | 1.7E-06 |
| SCG2      | ENSG00000171951 | secretogranin II [Source:HGNC Symbol;Acc:10575]                                                   | 1.28 | 1.7E-06 |
| ILF2      | ENSG00000143621 | interleukin enhancer binding factor 2 [Source:HGNC Symbol;Acc:6037]                               | 0.72 | 1.7E-06 |
| KLRG2     | ENSG00000188883 | killer cell lectin-like receptor subfamily G, member 2 [Source:HGNC Symbol;Acc:24778]             | 2.99 | 1.8E-06 |
| --        | ENSG00000255308 | --                                                                                                | 3.26 | 1.8E-06 |
| TRIM32    | ENSG00000119401 | tripartite motif containing 32 [Source:HGNC Symbol;Acc:16380]                                     | 0.86 | 1.8E-06 |

|          |                 |                                                                                           |      |         |
|----------|-----------------|-------------------------------------------------------------------------------------------|------|---------|
| TSLP     | ENSG00000145777 | thymic stromal lymphopoietin [Source:HGNC Symbol;Acc:30743]                               | 3.07 | 1.8E-06 |
| DAK      | ENSG00000149476 | dihydroxyacetone kinase 2 homolog ( <i>S. cerevisiae</i> ) [Source:HGNC Symbol;Acc:24552] | 0.89 | 1.9E-06 |
| HSDL2    | ENSG00000119471 | hydroxysteroid dehydrogenase like 2 [Source:HGNC Symbol;Acc:18572]                        | 0.81 | 1.9E-06 |
| --       | ENSG00000272054 | --                                                                                        | 1.05 | 1.9E-06 |
| TRMT1    | ENSG00000104907 | tRNA methyltransferase 1 homolog ( <i>S. cerevisiae</i> ) [Source:HGNC Symbol;Acc:25980]  | 1.33 | 1.9E-06 |
| DDX27    | ENSG00000124228 | DEAD (Asp-Glu-Ala-Asp) box polypeptide 27 [Source:HGNC Symbol;Acc:15837]                  | 0.59 | 1.9E-06 |
| ORC3     | ENSG00000135336 | origin recognition complex, subunit 3 [Source:HGNC Symbol;Acc:8489]                       | 0.86 | 2.0E-06 |
| ZNF428   | ENSG00000131116 | zinc finger protein 428 [Source:HGNC Symbol;Acc:20804]                                    | 1.14 | 2.0E-06 |
| SEC61A2  | ENSG00000065665 | Sec61 alpha 2 subunit ( <i>S. cerevisiae</i> ) [Source:HGNC Symbol;Acc:17702]             | 0.80 | 2.0E-06 |
| --       | ENSG00000223509 | --                                                                                        | 2.14 | 2.0E-06 |
| XYLT2    | ENSG00000015532 | xylosyltransferase II [Source:HGNC Symbol;Acc:15517]                                      | 0.95 | 2.0E-06 |
| FAM122B  | ENSG00000156504 | family with sequence similarity 122B [Source:HGNC Symbol;Acc:30490]                       | 0.84 | 2.0E-06 |
| MRPL48   | ENSG00000175581 | mitochondrial ribosomal protein L48 [Source:HGNC Symbol;Acc:16653]                        | 0.80 | 2.0E-06 |
| BARD1    | ENSG00000138376 | BRCA1 associated RING domain 1 [Source:HGNC Symbol;Acc:952]                               | 1.30 | 2.1E-06 |
| CAMKMT   | ENSG00000143919 | calmodulin-lysine N-methyltransferase [Source:HGNC Symbol;Acc:26276]                      | 0.93 | 2.1E-06 |
| BCL2L12  | ENSG00000126453 | BCL2-like 12 (proline rich) [Source:HGNC Symbol;Acc:13787]                                | 1.09 | 2.1E-06 |
| NFE2L3   | ENSG00000050344 | nuclear factor, erythroid 2-like 3 [Source:HGNC Symbol;Acc:7783]                          | 0.93 | 2.1E-06 |
| KIAA1257 | ENSG00000114656 | KIAA1257 [Source:HGNC Symbol;Acc:29231]                                                   | 1.46 | 2.1E-06 |
| GNPDA2   | ENSG00000163281 | glucosamine-6-phosphate deaminase 2 [Source:HGNC Symbol;Acc:21526]                        | 1.33 | 2.1E-06 |

|         |                 |                                                                                                           |      |         |
|---------|-----------------|-----------------------------------------------------------------------------------------------------------|------|---------|
| DCK     | ENSG00000156136 | deoxycytidine kinase [Source:HGNC Symbol;Acc:2704]                                                        | 1.35 | 2.1E-06 |
| CCNG1   | ENSG00000113328 | cyclin G1 [Source:HGNC Symbol;Acc:1592]                                                                   | 0.90 | 2.2E-06 |
| TPP2    | ENSG00000134900 | tripeptidyl peptidase II [Source:HGNC Symbol;Acc:12016]                                                   | 0.86 | 2.2E-06 |
| SLC41A1 | ENSG00000133065 | solute carrier family 41 (magnesium transporter), member 1<br>[Source:HGNC Symbol;Acc:19429]              | 1.26 | 2.2E-06 |
| POMGNT2 | ENSG00000144647 | protein O-linked mannose N-acetylglucosaminyltransferase 2 (beta<br>1,4-) [Source:HGNC Symbol;Acc:25902]  | 1.28 | 2.2E-06 |
| COA6    | ENSG00000168275 | cytochrome c oxidase assembly factor 6 homolog ( <i>S. cerevisiae</i> )<br>[Source:HGNC Symbol;Acc:18025] | 0.87 | 2.2E-06 |
| TEAD2   | ENSG00000074219 | TEA domain family member 2 [Source:HGNC Symbol;Acc:11715]                                                 | 1.11 | 2.3E-06 |
| CCDC25  | ENSG00000147419 | coiled-coil domain containing 25 [Source:HGNC Symbol;Acc:25591]                                           | 0.83 | 2.3E-06 |
| LIN9    | ENSG00000183814 | lin-9 homolog ( <i>C. elegans</i> ) [Source:HGNC Symbol;Acc:30830]                                        | 1.36 | 2.3E-06 |
| RIF1    | ENSG00000080345 | RAP1 interacting factor homolog (yeast) [Source:HGNC<br>Symbol;Acc:23207]                                 | 1.10 | 2.3E-06 |
| HOXB3   | ENSG00000120093 | homeobox B3 [Source:HGNC Symbol;Acc:5114]                                                                 | 0.95 | 2.4E-06 |
| GNL2    | ENSG00000134697 | guanine nucleotide binding protein-like 2 (nucleolar) [Source:HGNC<br>Symbol;Acc:29925]                   | 0.69 | 2.4E-06 |
| RABGGTB | ENSG00000137955 | Rab geranylgeranyltransferase, beta subunit [Source:HGNC<br>Symbol;Acc:9796]                              | 0.66 | 2.4E-06 |
| ZNF736  | ENSG00000234444 | zinc finger protein 736 [Source:HGNC Symbol;Acc:32467]                                                    | 1.38 | 2.4E-06 |
| TMEM70  | ENSG00000175606 | transmembrane protein 70 [Source:HGNC Symbol;Acc:26050]                                                   | 0.83 | 2.4E-06 |
| TOP2B   | ENSG00000077097 | topoisomerase (DNA) II beta 180kDa [Source:HGNC<br>Symbol;Acc:11990]                                      | 0.98 | 2.4E-06 |
| ZNF614  | ENSG00000142556 | zinc finger protein 614 [Source:HGNC Symbol;Acc:24722]                                                    | 1.10 | 2.4E-06 |
| FAHD1   | ENSG00000180185 | fumarylacetoacetate hydrolase domain containing 1 [Source:HGNC<br>Symbol;Acc:14169]                       | 0.64 | 2.4E-06 |
| PDSS2   | ENSG00000164494 | prenyl (decaprenyl) diphosphate synthase, subunit 2 [Source:HGNC<br>Symbol;Acc:23041]                     | 1.03 | 2.4E-06 |
| NDNL2   | ENSG00000185115 | necdin-like 2 [Source:HGNC Symbol;Acc:7677]                                                               | 1.21 | 2.4E-06 |

|          |                 |                                                                                |      |         |
|----------|-----------------|--------------------------------------------------------------------------------|------|---------|
| B4GALNT4 | ENSG00000182272 | beta-1,4-N-acetyl-galactosaminyl transferase 4 [Source:HGNC Symbol;Acc:26315]  | 1.86 | 2.5E-06 |
| C11orf73 | ENSG00000149196 | chromosome 11 open reading frame 73 [Source:HGNC Symbol;Acc:26938]             | 0.67 | 2.5E-06 |
| ZNF93    | ENSG00000184635 | zinc finger protein 93 [Source:HGNC Symbol;Acc:13169]                          | 1.51 | 2.5E-06 |
| GPX1P1   | ENSG00000197582 | glutathione peroxidase pseudogene 1 [Source:HGNC Symbol;Acc:4560]              | 1.10 | 2.5E-06 |
| BRD8     | ENSG00000112983 | bromodomain containing 8 [Source:HGNC Symbol;Acc:19874]                        | 0.72 | 2.5E-06 |
| C1orf131 | ENSG00000143633 | chromosome 1 open reading frame 131 [Source:HGNC Symbol;Acc:25332]             | 0.91 | 2.5E-06 |
| SPN      | ENSG00000197471 | sialophorin [Source:HGNC Symbol;Acc:11249]                                     | 2.93 | 2.6E-06 |
| KIAA1586 | ENSG00000168116 | KIAA1586 [Source:HGNC Symbol;Acc:21360]                                        | 1.73 | 2.7E-06 |
| DHX30    | ENSG00000132153 | DEAH (Asp-Glu-Ala-His) box helicase 30 [Source:HGNC Symbol;Acc:16716]          | 0.95 | 2.8E-06 |
| GAS2L3   | ENSG00000139354 | growth arrest-specific 2 like 3 [Source:HGNC Symbol;Acc:27475]                 | 1.23 | 2.8E-06 |
| --       | ENSG00000272452 | --                                                                             | 2.43 | 2.8E-06 |
| GRAMD1A  | ENSG00000089351 | GRAM domain containing 1A [Source:HGNC Symbol;Acc:29305]                       | 1.19 | 3.0E-06 |
| POLR2F   | ENSG00000100142 | polymerase (RNA) II (DNA directed) polypeptide F [Source:HGNC Symbol;Acc:9193] | 0.96 | 3.0E-06 |
| COA5     | ENSG00000183513 | cytochrome c oxidase assembly factor 5 [Source:HGNC Symbol;Acc:33848]          | 0.87 | 3.0E-06 |
| --       | ENSG00000230561 | --                                                                             | 1.44 | 3.0E-06 |
| GOLGA2P7 | ENSG00000225151 | golgin A2 pseudogene 7 [Source:HGNC Symbol;Acc:49516]                          | 0.88 | 3.0E-06 |
| NPAT     | ENSG00000149308 | nuclear protein, ataxia-telangiectasia locus [Source:HGNC Symbol;Acc:7896]     | 1.14 | 3.0E-06 |
| --       | ENSG00000243150 | --                                                                             | 1.18 | 3.0E-06 |
| REPS2    | ENSG00000169891 | RALBP1 associated Eps domain containing 2 [Source:HGNC Symbol;Acc:9963]        | 0.83 | 3.0E-06 |
| --       | ENSG00000247228 | --                                                                             | 1.42 | 3.0E-06 |



|          |                 |                                                                                                       |      |         |
|----------|-----------------|-------------------------------------------------------------------------------------------------------|------|---------|
| XRCC1    | ENSG00000073050 | X-ray repair complementing defective repair in Chinese hamster cells 1 [Source:HGNC Symbol;Acc:12828] | 0.86 | 3.1E-06 |
| C1orf233 | ENSG00000228594 | chromosome 1 open reading frame 233 [Source:HGNC Symbol;Acc:42951]                                    | 1.25 | 3.1E-06 |
| RBM26    | ENSG00000139746 | RNA binding motif protein 26 [Source:HGNC Symbol;Acc:20327]                                           | 0.88 | 3.1E-06 |
| CWF19L1  | ENSG00000095485 | CWF19-like 1, cell cycle control ( <i>S. pombe</i> ) [Source:HGNC Symbol;Acc:25613]                   | 0.83 | 3.2E-06 |
| HAT1     | ENSG00000128708 | histone acetyltransferase 1 [Source:HGNC Symbol;Acc:4821]                                             | 1.19 | 3.2E-06 |
| PFDN6    | ENSG00000204220 | prefoldin subunit 6 [Source:HGNC Symbol;Acc:4926]                                                     | 0.75 | 3.2E-06 |
| --       | ENSG00000226754 | --                                                                                                    | 1.84 | 3.2E-06 |
| PLCB2    | ENSG00000137841 | phospholipase C, beta 2 [Source:HGNC Symbol;Acc:9055]                                                 | 2.16 | 3.3E-06 |
| GOLIM4   | ENSG00000173905 | golgi integral membrane protein 4 [Source:HGNC Symbol;Acc:15448]                                      | 1.12 | 3.3E-06 |
| MBLAC2   | ENSG00000176055 | metallo-beta-lactamase domain containing 2 [Source:HGNC Symbol;Acc:33711]                             | 1.73 | 3.3E-06 |
| TUBGCP5  | ENSG00000153575 | tubulin, gamma complex associated protein 5 [Source:HGNC Symbol;Acc:18600]                            | 1.32 | 3.4E-06 |
| ZIC5     | ENSG00000139800 | Zic family member 5 [Source:HGNC Symbol;Acc:20322]                                                    | 1.27 | 3.4E-06 |
| STARD13  | ENSG00000133121 | StAR-related lipid transfer (START) domain containing 13 [Source:HGNC Symbol;Acc:19164]               | 1.05 | 3.4E-06 |
| FAR1     | ENSG00000197601 | fatty acyl CoA reductase 1 [Source:HGNC Symbol;Acc:26222]                                             | 0.97 | 3.4E-06 |
| TTC23    | ENSG00000103852 | tetratricopeptide repeat domain 23 [Source:HGNC Symbol;Acc:25730]                                     | 1.03 | 3.4E-06 |
| --       | ENSG00000262714 | --                                                                                                    | 2.02 | 3.5E-06 |
| GCNT1    | ENSG00000187210 | glucosaminyl (N-acetyl) transferase 1, core 2 [Source:HGNC Symbol;Acc:4203]                           | 0.85 | 3.5E-06 |
| NAA15    | ENSG00000164134 | N(alpha)-acetyltransferase 15, NatA auxiliary subunit [Source:HGNC Symbol;Acc:30782]                  | 1.06 | 3.5E-06 |
| ZNF445   | ENSG00000185219 | zinc finger protein 445 [Source:HGNC Symbol;Acc:21018]                                                | 0.82 | 3.5E-06 |

|           |                 |                                                                                               |      |         |
|-----------|-----------------|-----------------------------------------------------------------------------------------------|------|---------|
| C18orf54  | ENSG00000166845 | chromosome 18 open reading frame 54 [Source:HGNC Symbol;Acc:13796]                            | 2.04 | 3.6E-06 |
| CPSF4     | ENSG00000160917 | cleavage and polyadenylation specific factor 4, 30kDa [Source:HGNC Symbol;Acc:2327]           | 0.87 | 3.6E-06 |
| --        | ENSG00000263859 | --                                                                                            | 1.26 | 3.6E-06 |
| TIMM13    | ENSG00000099800 | translocase of inner mitochondrial membrane 13 homolog (yeast) [Source:HGNC Symbol;Acc:11816] | 1.35 | 3.6E-06 |
| TUFM      | ENSG00000178952 | Tu translation elongation factor, mitochondrial [Source:HGNC Symbol;Acc:12420]                | 0.82 | 3.6E-06 |
| RPL38     | ENSG00000172809 | ribosomal protein L38 [Source:HGNC Symbol;Acc:10349]                                          | 0.77 | 3.6E-06 |
| --        | ENSG00000272356 | --                                                                                            | 1.45 | 3.7E-06 |
| FAM86JP   | ENSG00000171084 | family with sequence similarity 86, member J, pseudogene [Source:HGNC Symbol;Acc:44097]       | 1.21 | 3.7E-06 |
| EVA1C     | ENSG00000166979 | eva-1 homolog C (C. elegans) [Source:HGNC Symbol;Acc:13239]                                   | 1.37 | 3.7E-06 |
| HS2ST1    | ENSG00000153936 | heparan sulfate 2-O-sulfotransferase 1 [Source:HGNC Symbol;Acc:5193]                          | 0.98 | 3.7E-06 |
| DUSP2     | ENSG00000158050 | dual specificity phosphatase 2 [Source:HGNC Symbol;Acc:3068]                                  | 1.69 | 3.7E-06 |
| LINC00242 | ENSG00000229214 | long intergenic non-protein coding RNA 242 [Source:HGNC Symbol;Acc:21249]                     | 3.18 | 3.7E-06 |
| BMS1      | ENSG00000165733 | BMS1 ribosome biogenesis factor [Source:HGNC Symbol;Acc:23505]                                | 0.70 | 3.8E-06 |
| FAM86C1   | ENSG00000158483 | family with sequence similarity 86, member C1 [Source:HGNC Symbol;Acc:25561]                  | 0.91 | 3.8E-06 |
| CPSF6     | ENSG00000111605 | cleavage and polyadenylation specific factor 6, 68kDa [Source:HGNC Symbol;Acc:13871]          | 0.79 | 3.8E-06 |
| PRDX2     | ENSG00000167815 | peroxiredoxin 2 [Source:HGNC Symbol;Acc:9353]                                                 | 0.86 | 3.9E-06 |
| RPL39L    | ENSG00000163923 | ribosomal protein L39-like [Source:HGNC Symbol;Acc:17094]                                     | 0.98 | 3.9E-06 |
| C6orf48   | ENSG00000204387 | chromosome 6 open reading frame 48 [Source:HGNC Symbol;Acc:19078]                             | 0.81 | 3.9E-06 |
| --        | ENSG00000266969 | --                                                                                            | 1.46 | 3.9E-06 |

|          |                 |                                                                                       |      |         |
|----------|-----------------|---------------------------------------------------------------------------------------|------|---------|
| FSD1L    | ENSG00000106701 | fibronectin type III and SPRY domain containing 1-like [Source:HGNC Symbol;Acc:13753] | 1.48 | 3.9E-06 |
| FAIM     | ENSG00000158234 | Fas apoptotic inhibitory molecule [Source:HGNC Symbol;Acc:18703]                      | 0.81 | 4.0E-06 |
| MRPS15   | ENSG00000116898 | mitochondrial ribosomal protein S15 [Source:HGNC Symbol;Acc:14504]                    | 0.71 | 4.0E-06 |
| HSD17B8  | ENSG00000204228 | hydroxysteroid (17-beta) dehydrogenase 8 [Source:HGNC Symbol;Acc:3554]                | 1.45 | 4.1E-06 |
| KARS     | ENSG00000065427 | lysyl-tRNA synthetase [Source:HGNC Symbol;Acc:6215]                                   | 0.55 | 4.1E-06 |
| USP1     | ENSG00000162607 | ubiquitin specific peptidase 1 [Source:HGNC Symbol;Acc:12607]                         | 1.16 | 4.1E-06 |
| ACAD8    | ENSG00000151498 | acyl-CoA dehydrogenase family, member 8 [Source:HGNC Symbol;Acc:87]                   | 0.71 | 4.2E-06 |
| --       | ENSG00000270147 | --                                                                                    | 2.27 | 4.2E-06 |
| GTF2H3   | ENSG00000111358 | general transcription factor IIH, polypeptide 3, 34kDa [Source:HGNC Symbol;Acc:4657]  | 0.95 | 4.3E-06 |
| ERLIN1   | ENSG00000107566 | ER lipid raft associated 1 [Source:HGNC Symbol;Acc:16947]                             | 0.90 | 4.3E-06 |
| RPS9     | ENSG00000170889 | ribosomal protein S9 [Source:HGNC Symbol;Acc:10442]                                   | 0.98 | 4.3E-06 |
| --       | ENSG00000273066 | --                                                                                    | 1.49 | 4.3E-06 |
| SH3BGRL  | ENSG00000131171 | SH3 domain binding glutamic acid-rich protein like [Source:HGNC Symbol;Acc:10823]     | 1.31 | 4.4E-06 |
| DEPDC4   | ENSG00000166153 | DEP domain containing 4 [Source:HGNC Symbol;Acc:22952]                                | 2.57 | 4.4E-06 |
| --       | ENSG00000269983 | --                                                                                    | 1.65 | 4.4E-06 |
| KIAA1244 | ENSG00000112379 | KIAA1244 [Source:HGNC Symbol;Acc:21213]                                               | 0.91 | 4.5E-06 |
| RPL24    | ENSG00000114391 | ribosomal protein L24 [Source:HGNC Symbol;Acc:10325]                                  | 0.81 | 4.5E-06 |
| MACROD1  | ENSG00000133315 | MACRO domain containing 1 [Source:HGNC Symbol;Acc:29598]                              | 1.08 | 4.5E-06 |
| ZBTB39   | ENSG00000166860 | zinc finger and BTB domain containing 39 [Source:HGNC Symbol;Acc:29014]               | 1.06 | 4.5E-06 |
| --       | ENSG00000259901 | --                                                                                    | 3.16 | 4.5E-06 |
| RPL18A   | ENSG00000105640 | ribosomal protein L18a [Source:HGNC Symbol;Acc:10311]                                 | 1.11 | 4.6E-06 |

|         |                 |                                                                                                             |      |         |
|---------|-----------------|-------------------------------------------------------------------------------------------------------------|------|---------|
| SCUBE3  | ENSG00000146197 | signal peptide, CUB domain, EGF-like 3 [Source:HGNC Symbol;Acc:13655]                                       | 2.39 | 4.6E-06 |
| PLA2G3  | ENSG00000100078 | phospholipase A2, group III [Source:HGNC Symbol;Acc:17934]                                                  | 1.65 | 4.6E-06 |
| FGFBP3  | ENSG00000174721 | fibroblast growth factor binding protein 3 [Source:HGNC Symbol;Acc:23428]                                   | 2.69 | 4.7E-06 |
| INPP5J  | ENSG00000185133 | inositol polyphosphate-5-phosphatase J [Source:HGNC Symbol;Acc:8956]                                        | 0.97 | 4.7E-06 |
| --      | ENSG00000266918 | --                                                                                                          | 2.25 | 4.7E-06 |
| AATF    | ENSG00000108270 | apoptosis antagonizing transcription factor [Source:HGNC Symbol;Acc:19235]                                  | 0.72 | 4.7E-06 |
| HNRNPA3 | ENSG00000170144 | heterogeneous nuclear ribonucleoprotein A3 [Source:HGNC Symbol;Acc:24941]                                   | 0.59 | 4.8E-06 |
| ANKRD23 | ENSG00000163126 | ankyrin repeat domain 23 [Source:HGNC Symbol;Acc:24470]                                                     | 1.13 | 4.9E-06 |
| PLEKHH2 | ENSG00000152527 | pleckstrin homology domain containing, family H (with MyTH4 domain) member 2 [Source:HGNC Symbol;Acc:30506] | 2.54 | 4.9E-06 |
| KATNB1  | ENSG00000140854 | katanin p80 (WD repeat containing) subunit B 1 [Source:HGNC Symbol;Acc:6217]                                | 1.18 | 4.9E-06 |
| --      | ENSG00000250303 | --                                                                                                          | 2.63 | 4.9E-06 |
| --      | ENSG00000255474 | --                                                                                                          | 1.06 | 5.0E-06 |
| PEX3    | ENSG00000034693 | peroxisomal biogenesis factor 3 [Source:HGNC Symbol;Acc:8858]                                               | 1.17 | 5.0E-06 |
| TXNRD3  | ENSG00000197763 | thioredoxin reductase 3 [Source:HGNC Symbol;Acc:20667]                                                      | 1.48 | 5.0E-06 |
| NOTCH4  | ENSG00000204301 | notch 4 [Source:HGNC Symbol;Acc:7884]                                                                       | 2.03 | 5.1E-06 |
| UQCC1   | ENSG00000101019 | ubiquinol-cytochrome c reductase complex assembly factor 1 [Source:HGNC Symbol;Acc:15891]                   | 0.64 | 5.1E-06 |
| LSM10   | ENSG00000181817 | LSM10, U7 small nuclear RNA associated [Source:HGNC Symbol;Acc:17562]                                       | 1.06 | 5.2E-06 |
| --      | ENSG00000250132 | --                                                                                                          | 2.72 | 5.2E-06 |
| PSAT1   | ENSG00000135069 | phosphoserine aminotransferase 1 [Source:HGNC Symbol;Acc:19129]                                             | 1.25 | 5.2E-06 |

|          |                 |                                                                                                      |      |         |
|----------|-----------------|------------------------------------------------------------------------------------------------------|------|---------|
| MAP2K6   | ENSG00000108984 | mitogen-activated protein kinase kinase 6 [Source:HGNC Symbol;Acc:6846]                              | 1.36 | 5.2E-06 |
| GXYLT2   | ENSG00000172986 | glucoside xylosyltransferase 2 [Source:HGNC Symbol;Acc:33383]                                        | 3.18 | 5.2E-06 |
| NFXL1    | ENSG00000170448 | nuclear transcription factor, X-box binding-like 1 [Source:HGNC Symbol;Acc:18726]                    | 0.82 | 5.3E-06 |
| CHST14   | ENSG00000169105 | carbohydrate (N-acetylgalactosamine 4-0) sulfotransferase 14 [Source:HGNC Symbol;Acc:24464]          | 1.78 | 5.3E-06 |
| SIX4     | ENSG00000100625 | SIX homeobox 4 [Source:HGNC Symbol;Acc:10890]                                                        | 2.45 | 5.3E-06 |
| DNALI1   | ENSG00000163879 | dynein, axonemal, light intermediate chain 1 [Source:HGNC Symbol;Acc:14353]                          | 1.38 | 5.3E-06 |
| C2orf69  | ENSG00000178074 | chromosome 2 open reading frame 69 [Source:HGNC Symbol;Acc:26799]                                    | 1.17 | 5.4E-06 |
| RCN1     | ENSG00000049449 | reticulocalbin 1, EF-hand calcium binding domain [Source:HGNC Symbol;Acc:9934]                       | 0.69 | 5.4E-06 |
| CWC27    | ENSG00000153015 | CWC27 spliceosome-associated protein homolog ( <i>S. cerevisiae</i> ) [Source:HGNC Symbol;Acc:10664] | 1.22 | 5.5E-06 |
| APOA1BP  | ENSG00000163382 | apolipoprotein A-I binding protein [Source:HGNC Symbol;Acc:18453]                                    | 0.80 | 5.6E-06 |
| --       | ENSG00000249743 | --                                                                                                   | 2.47 | 5.6E-06 |
| BACE1    | ENSG00000186318 | beta-site APP-cleaving enzyme 1 [Source:HGNC Symbol;Acc:933]                                         | 1.14 | 5.6E-06 |
| PRPF4    | ENSG00000136875 | pre-mRNA processing factor 4 [Source:HGNC Symbol;Acc:17349]                                          | 0.68 | 5.6E-06 |
| CEP164P1 | ENSG00000226937 | centrosomal protein 164kDa pseudogene 1 [Source:HGNC Symbol;Acc:44988]                               | 1.36 | 5.6E-06 |
| KBTBD4   | ENSG00000123444 | kelch repeat and BTB (POZ) domain containing 4 [Source:HGNC Symbol;Acc:23761]                        | 0.69 | 5.7E-06 |
| INTS2    | ENSG00000108506 | integrator complex subunit 2 [Source:HGNC Symbol;Acc:29241]                                          | 1.05 | 5.8E-06 |
| --       | ENSG00000248429 | --                                                                                                   | 1.08 | 5.9E-06 |
| --       | ENSG00000228801 | --                                                                                                   | 1.82 | 5.9E-06 |
| AHI1     | ENSG00000135541 | Abelson helper integration site 1 [Source:HGNC Symbol;Acc:21575]                                     | 0.93 | 5.9E-06 |

|          |                 |                                                                                                |      |         |
|----------|-----------------|------------------------------------------------------------------------------------------------|------|---------|
| CAMK1    | ENSG00000134072 | calcium/calmodulin-dependent protein kinase I [Source:HGNC Symbol;Acc:1459]                    | 1.01 | 6.0E-06 |
| BDH2     | ENSG00000164039 | 3-hydroxybutyrate dehydrogenase, type 2 [Source:HGNC Symbol;Acc:32389]                         | 3.30 | 6.0E-06 |
| FAM149B1 | ENSG00000138286 | family with sequence similarity 149, member B1 [Source:HGNC Symbol;Acc:29162]                  | 0.77 | 6.0E-06 |
| KIAA1430 | ENSG00000164323 | KIAA1430 [Source:HGNC Symbol;Acc:29276]                                                        | 1.30 | 6.0E-06 |
| TPPP3    | ENSG00000159713 | tubulin polymerization-promoting protein family member 3 [Source:HGNC Symbol;Acc:24162]        | 1.71 | 6.0E-06 |
| TIMM10B  | ENSG00000132286 | translocase of inner mitochondrial membrane 10 homolog B (yeast) [Source:HGNC Symbol;Acc:4022] | 0.69 | 6.1E-06 |
| --       | ENSG00000258824 | --                                                                                             | 2.19 | 6.1E-06 |
| RSRC1    | ENSG00000174891 | arginine/serine-rich coiled-coil 1 [Source:HGNC Symbol;Acc:24152]                              | 0.89 | 6.1E-06 |
| CDAN1    | ENSG00000140326 | codanin 1 [Source:HGNC Symbol;Acc:1713]                                                        | 1.13 | 6.2E-06 |
| ZNF815P  | ENSG00000235944 | zinc finger protein 815, pseudogene [Source:HGNC Symbol;Acc:22029]                             | 3.46 | 6.2E-06 |
| MRPS14   | ENSG00000120333 | mitochondrial ribosomal protein S14 [Source:HGNC Symbol;Acc:14049]                             | 0.83 | 6.3E-06 |
| --       | ENSG00000264019 | --                                                                                             | 0.78 | 6.3E-06 |
| DHX35    | ENSG00000101452 | DEAH (Asp-Glu-Ala-His) box polypeptide 35 [Source:HGNC Symbol;Acc:15861]                       | 0.85 | 6.3E-06 |
| HVCN1    | ENSG00000122986 | hydrogen voltage-gated channel 1 [Source:HGNC Symbol;Acc:28240]                                | 1.57 | 6.4E-06 |
| --       | ENSG00000249721 | --                                                                                             | 2.53 | 6.4E-06 |
| CD37     | ENSG00000104894 | CD37 molecule [Source:HGNC Symbol;Acc:1666]                                                    | 1.43 | 6.4E-06 |
| RBBP4    | ENSG00000162521 | retinoblastoma binding protein 4 [Source:HGNC Symbol;Acc:9887]                                 | 0.79 | 6.5E-06 |
| ZNF486   | ENSG00000256229 | zinc finger protein 486 [Source:HGNC Symbol;Acc:20807]                                         | 1.20 | 6.5E-06 |
| --       | ENSG00000263588 | Uncharacterized protein [Source:UniProtKB/TrEMBL;Acc:J3KTR3]                                   | 3.30 | 6.5E-06 |
| --       | ENSG00000250669 | --                                                                                             | 2.67 | 6.5E-06 |
| RAD50    | ENSG00000113522 | RAD50 homolog ( <i>S. cerevisiae</i> ) [Source:HGNC Symbol;Acc:9816]                           | 0.93 | 6.6E-06 |

|          |                 |                                                                                                     |      |         |
|----------|-----------------|-----------------------------------------------------------------------------------------------------|------|---------|
| ZNF738   | ENSG00000172687 | zinc finger protein 738 [Source:HGNC Symbol;Acc:32469]                                              | 1.10 | 6.6E-06 |
| GPR68    | ENSG00000119714 | G protein-coupled receptor 68 [Source:HGNC Symbol;Acc:4519]                                         | 2.09 | 6.7E-06 |
| FGF2     | ENSG00000138685 | fibroblast growth factor 2 (basic) [Source:HGNC Symbol;Acc:3676]                                    | 2.36 | 6.7E-06 |
| ARHGAP19 | ENSG00000213390 | Rho GTPase activating protein 19 [Source:HGNC Symbol;Acc:23724]                                     | 1.03 | 6.7E-06 |
| RPS11    | ENSG00000142534 | ribosomal protein S11 [Source:HGNC Symbol;Acc:10384]                                                | 0.82 | 6.7E-06 |
| --       | ENSG00000263843 | --                                                                                                  | 1.37 | 6.8E-06 |
| PIP4K2B  | ENSG00000141720 | phosphatidylinositol-5-phosphate 4-kinase, type II, beta [Source:HGNC Symbol;Acc:8998]              | 0.81 | 6.8E-06 |
| MRPL4    | ENSG00000105364 | mitochondrial ribosomal protein L4 [Source:HGNC Symbol;Acc:14276]                                   | 1.35 | 6.8E-06 |
| FUNDC1   | ENSG00000069509 | FUN14 domain containing 1 [Source:HGNC Symbol;Acc:28746]                                            | 0.70 | 6.8E-06 |
| ATAD3A   | ENSG00000197785 | ATPase family, AAA domain containing 3A [Source:HGNC Symbol;Acc:25567]                              | 1.33 | 6.9E-06 |
| PPARGC1B | ENSG00000155846 | peroxisome proliferator-activated receptor gamma, coactivator 1 beta [Source:HGNC Symbol;Acc:30022] | 1.07 | 6.9E-06 |
| FCAMR    | ENSG00000162897 | Fc receptor, IgA, IgM, high affinity [Source:HGNC Symbol;Acc:24692]                                 | 2.22 | 6.9E-06 |
| ZNHIT6   | ENSG00000117174 | zinc finger, HIT-type containing 6 [Source:HGNC Symbol;Acc:26089]                                   | 1.02 | 7.0E-06 |
| --       | ENSG00000257596 | --                                                                                                  | 2.19 | 7.0E-06 |
| CD83     | ENSG00000112149 | CD83 molecule [Source:HGNC Symbol;Acc:1703]                                                         | 1.98 | 7.1E-06 |
| --       | ENSG00000264207 | --                                                                                                  | 1.98 | 7.2E-06 |
| EIF4EBP1 | ENSG00000187840 | eukaryotic translation initiation factor 4E binding protein 1 [Source:HGNC Symbol;Acc:3288]         | 1.22 | 7.2E-06 |
| --       | ENSG00000271976 | --                                                                                                  | 1.01 | 7.2E-06 |
| --       | ENSG00000241720 | --                                                                                                  | 0.71 | 7.3E-06 |
| THOP1    | ENSG00000172009 | thimet oligopeptidase 1 [Source:HGNC Symbol;Acc:11793]                                              | 1.14 | 7.4E-06 |
| RPL39    | ENSG00000198918 | ribosomal protein L39 [Source:HGNC Symbol;Acc:10350]                                                | 0.86 | 7.4E-06 |
| SHMT2    | ENSG00000182199 | serine hydroxymethyltransferase 2 (mitochondrial) [Source:HGNC Symbol;Acc:10852]                    | 0.77 | 7.4E-06 |

|          |                 |                                                                                                                                      |      |         |
|----------|-----------------|--------------------------------------------------------------------------------------------------------------------------------------|------|---------|
| RCBTB2   | ENSG00000136161 | regulator of chromosome condensation (RCC1) and BTB (POZ) domain containing protein 2 [Source:HGNC Symbol;Acc:1914]                  | 2.51 | 7.5E-06 |
| MAPK15   | ENSG00000181085 | mitogen-activated protein kinase 15 [Source:HGNC Symbol;Acc:24667]                                                                   | 1.13 | 7.5E-06 |
| ENOX2    | ENSG00000165675 | ecto-NOX disulfide-thiol exchanger 2 [Source:HGNC Symbol;Acc:2259]                                                                   | 0.95 | 7.5E-06 |
| SLC17A9  | ENSG00000101194 | solute carrier family 17 (vesicular nucleotide transporter), member 9 [Source:HGNC Symbol;Acc:16192]                                 | 1.23 | 7.5E-06 |
| MAT2A    | ENSG00000168906 | methionine adenosyltransferase II, alpha [Source:HGNC Symbol;Acc:6904]                                                               | 0.70 | 7.6E-06 |
| B3GNT9   | ENSG00000237172 | UDP-GlcNAc:betaGal beta-1,3-N-acetylglucosaminyltransferase 9 [Source:HGNC Symbol;Acc:28714]                                         | 0.82 | 7.6E-06 |
| MCAT     | ENSG00000100294 | malonyl CoA:ACP acyltransferase (mitochondrial) [Source:HGNC Symbol;Acc:29622]                                                       | 0.97 | 7.7E-06 |
| --       | ENSG00000272149 | --                                                                                                                                   | 1.64 | 7.7E-06 |
| AASDH    | ENSG00000157426 | aminoadipate-semialdehyde dehydrogenase [Source:HGNC Symbol;Acc:23993]                                                               | 0.95 | 7.8E-06 |
| SERPINF2 | ENSG00000167711 | serpin peptidase inhibitor, clade F (alpha-2 antiplasmin, pigment epithelium derived factor), member 2 [Source:HGNC Symbol;Acc:9075] | 1.22 | 7.8E-06 |
| --       | ENSG00000256663 | --                                                                                                                                   | 3.01 | 7.9E-06 |
| --       | ENSG00000170161 | --                                                                                                                                   | 1.54 | 7.9E-06 |
| RABL5    | ENSG00000128581 | RAB, member RAS oncogene family-like 5 [Source:HGNC Symbol;Acc:21895]                                                                | 1.03 | 7.9E-06 |
| LPCAT3   | ENSG00000111684 | lysophosphatidylcholine acyltransferase 3 [Source:HGNC Symbol;Acc:30244]                                                             | 0.57 | 8.0E-06 |
| D2HGDH   | ENSG00000180902 | D-2-hydroxyglutarate dehydrogenase [Source:HGNC Symbol;Acc:28358]                                                                    | 1.30 | 8.0E-06 |



|            |                 |                                                                                          |      |         |
|------------|-----------------|------------------------------------------------------------------------------------------|------|---------|
| GNPAT      | ENSG00000116906 | glyceronephosphate O-acyltransferase [Source:HGNC Symbol;Acc:4416]                       | 0.70 | 8.0E-06 |
| MPC2       | ENSG00000143158 | mitochondrial pyruvate carrier 2 [Source:HGNC Symbol;Acc:24515]                          | 0.63 | 8.1E-06 |
| MECOM      | ENSG00000085276 | MDS1 and EVI1 complex locus [Source:HGNC Symbol;Acc:3498]                                | 1.04 | 8.3E-06 |
| GRIN2B     | ENSG00000273079 | glutamate receptor, ionotropic, N-methyl D-aspartate 2B [Source:HGNC Symbol;Acc:4586]    | 0.91 | 8.4E-06 |
| TTC5       | ENSG00000136319 | tetratricopeptide repeat domain 5 [Source:HGNC Symbol;Acc:19274]                         | 0.98 | 8.4E-06 |
| --         | ENSG00000268402 | --                                                                                       | 2.74 | 8.5E-06 |
| SPDYA      | ENSG00000163806 | speedy/RINGO cell cycle regulator family member A [Source:HGNC Symbol;Acc:30613]         | 1.28 | 8.5E-06 |
| C2orf48    | ENSG00000163009 | chromosome 2 open reading frame 48 [Source:HGNC Symbol;Acc:26322]                        | 3.24 | 8.6E-06 |
| --         | ENSG00000267577 | --                                                                                       | 1.68 | 8.8E-06 |
| C2orf43    | ENSG00000118961 | chromosome 2 open reading frame 43 [Source:HGNC Symbol;Acc:26145]                        | 0.81 | 8.8E-06 |
| ZNF346     | ENSG00000113761 | zinc finger protein 346 [Source:HGNC Symbol;Acc:16403]                                   | 1.00 | 8.8E-06 |
| RPS15A     | ENSG00000134419 | ribosomal protein S15a [Source:HGNC Symbol;Acc:10389]                                    | 1.09 | 9.0E-06 |
| UTP11L     | ENSG00000183520 | UTP11-like, U3 small nucleolar ribonucleoprotein, (yeast) [Source:HGNC Symbol;Acc:24329] | 0.83 | 9.0E-06 |
| RPAP3      | ENSG00000005175 | RNA polymerase II associated protein 3 [Source:HGNC Symbol;Acc:26151]                    | 1.09 | 9.1E-06 |
| GARNL3     | ENSG00000136895 | GTPase activating Rap/RanGAP domain-like 3 [Source:HGNC Symbol;Acc:25425]                | 1.33 | 9.1E-06 |
| VWCE       | ENSG00000167992 | von Willebrand factor C and EGF domains [Source:HGNC Symbol;Acc:26487]                   | 1.93 | 9.2E-06 |
| PHGDH      | ENSG00000092621 | phosphoglycerate dehydrogenase [Source:HGNC Symbol;Acc:8923]                             | 1.55 | 9.2E-06 |
| GABPB1-AS1 | ENSG00000244879 | GABPB1 antisense RNA 1 [Source:HGNC Symbol;Acc:44157]                                    | 1.80 | 9.3E-06 |
| RPS14      | ENSG00000164587 | ribosomal protein S14 [Source:HGNC Symbol;Acc:10387]                                     | 0.88 | 9.3E-06 |

|           |                 |                                                                                               |      |         |
|-----------|-----------------|-----------------------------------------------------------------------------------------------|------|---------|
| NPRL2     | ENSG00000114388 | nitrogen permease regulator-like 2 ( <i>S. cerevisiae</i> ) [Source:HGNC Symbol;Acc:24969]    | 0.88 | 9.3E-06 |
| ASUN      | ENSG00000064102 | asunder spermatogenesis regulator [Source:HGNC Symbol;Acc:20174]                              | 0.97 | 9.4E-06 |
| GBGT1     | ENSG00000148288 | globoside alpha-1,3-N-acetylgalactosaminyltransferase 1 [Source:HGNC Symbol;Acc:20460]        | 2.71 | 9.4E-06 |
| MRPL40    | ENSG00000185608 | mitochondrial ribosomal protein L40 [Source:HGNC Symbol;Acc:14491]                            | 1.04 | 9.5E-06 |
| SNHG7     | ENSG00000233016 | small nucleolar RNA host gene 7 (non-protein coding) [Source:HGNC Symbol;Acc:28254]           | 1.03 | 9.5E-06 |
| HNRNPR    | ENSG00000125944 | heterogeneous nuclear ribonucleoprotein R [Source:HGNC Symbol;Acc:5047]                       | 0.95 | 9.7E-06 |
| --        | ENSG00000261556 | --                                                                                            | 1.25 | 9.8E-06 |
| CEBPZ-AS1 | ENSG00000218739 | CEBPZ antisense RNA 1 [Source:HGNC Symbol;Acc:49288]                                          | 0.88 | 9.9E-06 |
| --        | ENSG00000260260 | --                                                                                            | 1.57 | 1.0E-05 |
| COMMD10   | ENSG00000145781 | COMM domain containing 10 [Source:HGNC Symbol;Acc:30201]                                      | 0.92 | 1.0E-05 |
| ZNF584    | ENSG00000171574 | zinc finger protein 584 [Source:HGNC Symbol;Acc:27318]                                        | 1.47 | 1.0E-05 |
| SPAG16    | ENSG00000144451 | sperm associated antigen 16 [Source:HGNC Symbol;Acc:23225]                                    | 1.04 | 1.0E-05 |
| WDYHV1    | ENSG00000156795 | WDYHV motif containing 1 [Source:HGNC Symbol;Acc:25490]                                       | 0.91 | 1.0E-05 |
| --        | ENSG00000250186 | --                                                                                            | 1.05 | 1.0E-05 |
| CEP68     | ENSG00000011523 | centrosomal protein 68kDa [Source:HGNC Symbol;Acc:29076]                                      | 0.80 | 1.0E-05 |
| MANEA     | ENSG00000172469 | mannosidase, endo-alpha [Source:HGNC Symbol;Acc:21072]                                        | 2.37 | 1.0E-05 |
| OARD1     | ENSG00000124596 | O-acyl-ADP-ribose deacylase 1 [Source:HGNC Symbol;Acc:21257]                                  | 0.68 | 1.0E-05 |
| RAB36     | ENSG00000100228 | RAB36, member RAS oncogene family [Source:HGNC Symbol;Acc:9775]                               | 1.51 | 1.0E-05 |
| UBA2      | ENSG00000126261 | ubiquitin-like modifier activating enzyme 2 [Source:HGNC Symbol;Acc:30661]                    | 0.75 | 1.1E-05 |
| TIMM23    | ENSG00000138297 | translocase of inner mitochondrial membrane 23 homolog (yeast) [Source:HGNC Symbol;Acc:17312] | 0.69 | 1.1E-05 |

|        |                 |                                                                                                                        |      |         |
|--------|-----------------|------------------------------------------------------------------------------------------------------------------------|------|---------|
| COQ7   | ENSG00000167186 | coenzyme Q7 homolog, ubiquinone (yeast) [Source:HGNC Symbol;Acc:2244]                                                  | 0.72 | 1.1E-05 |
| SLC6A6 | ENSG00000131389 | solute carrier family 6 (neurotransmitter transporter), member 6 [Source:HGNC Symbol;Acc:11052]                        | 0.93 | 1.1E-05 |
| RPL36A | ENSG00000241343 | ribosomal protein L36a [Source:HGNC Symbol;Acc:10359]                                                                  | 1.11 | 1.1E-05 |
| GCHFR  | ENSG00000137880 | GTP cyclohydrolase I feedback regulator [Source:HGNC Symbol;Acc:4194]                                                  | 1.41 | 1.1E-05 |
| APPL1  | ENSG00000157500 | adaptor protein, phosphotyrosine interaction, PH domain and leucine zipper containing 1 [Source:HGNC Symbol;Acc:24035] | 1.03 | 1.1E-05 |
| ADK    | ENSG00000156110 | adenosine kinase [Source:HGNC Symbol;Acc:257]                                                                          | 0.86 | 1.1E-05 |
| RNPS1  | ENSG00000205937 | RNA binding protein S1, serine-rich domain [Source:HGNC Symbol;Acc:10080]                                              | 0.60 | 1.1E-05 |
| MRPS31 | ENSG00000102738 | mitochondrial ribosomal protein S31 [Source:HGNC Symbol;Acc:16632]                                                     | 0.78 | 1.1E-05 |
| REXO2  | ENSG00000076043 | RNA exonuclease 2 [Source:HGNC Symbol;Acc:17851]                                                                       | 0.75 | 1.1E-05 |
| MRGBP  | ENSG00000101189 | MRG/MORF4L binding protein [Source:HGNC Symbol;Acc:15866]                                                              | 0.75 | 1.1E-05 |
| PDCD2  | ENSG00000071994 | programmed cell death 2 [Source:HGNC Symbol;Acc:8762]                                                                  | 0.67 | 1.1E-05 |
| NFS1   | ENSG00000244005 | NFS1 cysteine desulfurase [Source:HGNC Symbol;Acc:15910]                                                               | 0.76 | 1.1E-05 |
| FAS    | ENSG00000026103 | Fas cell surface death receptor [Source:HGNC Symbol;Acc:11920]                                                         | 1.18 | 1.1E-05 |
| RPL26  | ENSG00000161970 | ribosomal protein L26 [Source:HGNC Symbol;Acc:10327]                                                                   | 1.19 | 1.1E-05 |
| --     | ENSG00000236155 | --                                                                                                                     | 1.28 | 1.1E-05 |
| MXRA7  | ENSG00000182534 | matrix-remodelling associated 7 [Source:HGNC Symbol;Acc:7541]                                                          | 1.01 | 1.2E-05 |
| TMEM9  | ENSG00000116857 | transmembrane protein 9 [Source:HGNC Symbol;Acc:18823]                                                                 | 0.78 | 1.2E-05 |
| CNPY4  | ENSG00000166997 | canopy FGF signaling regulator 4 [Source:HGNC Symbol;Acc:28631]                                                        | 1.99 | 1.2E-05 |
| SPR    | ENSG00000116096 | sepiapterin reductase (7,8-dihydrobiopterin:NADP+ oxidoreductase) [Source:HGNC Symbol;Acc:11257]                       | 0.72 | 1.2E-05 |
| AIF1L  | ENSG00000126878 | allograft inflammatory factor 1-like [Source:HGNC Symbol;Acc:28904]                                                    | 0.83 | 1.2E-05 |

|          |                 |                                                                                                                                 |      |         |
|----------|-----------------|---------------------------------------------------------------------------------------------------------------------------------|------|---------|
| DNAJC2   | ENSG00000105821 | DnaJ (Hsp40) homolog, subfamily C, member 2 [Source:HGNC Symbol;Acc:13192]                                                      | 0.90 | 1.2E-05 |
| MIPEP    | ENSG00000027001 | mitochondrial intermediate peptidase [Source:HGNC Symbol;Acc:7104]                                                              | 0.87 | 1.2E-05 |
| ASTN2    | ENSG00000148219 | astrotactin 2 [Source:HGNC Symbol;Acc:17021]                                                                                    | 1.69 | 1.2E-05 |
| BCCIP    | ENSG00000107949 | BRCA2 and CDKN1A interacting protein [Source:HGNC Symbol;Acc:978]                                                               | 0.64 | 1.2E-05 |
| DERL3    | ENSG00000099958 | derlin 3 [Source:HGNC Symbol;Acc:14236]                                                                                         | 1.84 | 1.2E-05 |
| HOXB7    | ENSG00000260027 | homeobox B7 [Source:HGNC Symbol;Acc:5118]                                                                                       | 0.74 | 1.2E-05 |
| NME4     | ENSG00000103202 | NME/NM23 nucleoside diphosphate kinase 4 [Source:HGNC Symbol;Acc:7852]                                                          | 1.09 | 1.2E-05 |
| ANAPC13  | ENSG00000129055 | anaphase promoting complex subunit 13 [Source:HGNC Symbol;Acc:24540]                                                            | 0.72 | 1.2E-05 |
| --       | ENSG00000261526 | --                                                                                                                              | 1.41 | 1.2E-05 |
| PHF10    | ENSG00000130024 | PHD finger protein 10 [Source:HGNC Symbol;Acc:18250]                                                                            | 0.90 | 1.2E-05 |
| PLCH1    | ENSG00000114805 | phospholipase C, eta 1 [Source:HGNC Symbol;Acc:29185]                                                                           | 1.04 | 1.2E-05 |
| KLHL8    | ENSG00000145332 | kelch-like family member 8 [Source:HGNC Symbol;Acc:18644]                                                                       | 1.15 | 1.2E-05 |
| PLA2G4A  | ENSG00000116711 | phospholipase A2, group IVA (cytosolic, calcium-dependent) [Source:HGNC Symbol;Acc:9035]                                        | 3.05 | 1.3E-05 |
| RIOK2    | ENSG00000058729 | RIO kinase 2 [Source:HGNC Symbol;Acc:18999]                                                                                     | 0.89 | 1.3E-05 |
| HNRNPD   | ENSG00000138668 | heterogeneous nuclear ribonucleoprotein D (AU-rich element RNA binding protein 1, 37kDa) [Source:HGNC Symbol;Acc:5036]          | 0.66 | 1.3E-05 |
| GAS6-AS1 | ENSG00000233695 | GAS6 antisense RNA 1 [Source:HGNC Symbol;Acc:39826]                                                                             | 1.44 | 1.3E-05 |
| NUDT8    | ENSG00000167799 | nudix (nucleoside diphosphate linked moiety X)-type motif 8 [Source:HGNC Symbol;Acc:8055]                                       | 1.28 | 1.3E-05 |
| KHSRP    | ENSG00000088247 | KH-type splicing regulatory protein [Source:HGNC Symbol;Acc:6316]                                                               | 0.73 | 1.3E-05 |
| CFTR     | ENSG00000001626 | cystic fibrosis transmembrane conductance regulator (ATP-binding cassette sub-family C, member 7) [Source:HGNC Symbol;Acc:1884] | 1.02 | 1.3E-05 |
| GPR137C  | ENSG00000180998 | G protein-coupled receptor 137C [Source:HGNC Symbol;Acc:25445]                                                                  | 2.92 | 1.3E-05 |

|          |                 |                                                                                                                 |      |         |
|----------|-----------------|-----------------------------------------------------------------------------------------------------------------|------|---------|
| KCNMB4   | ENSG00000135643 | potassium large conductance calcium-activated channel, subfamily M, beta member 4 [Source:HGNC Symbol;Acc:6289] | 0.78 | 1.3E-05 |
| MORN2    | ENSG00000188010 | MORN repeat containing 2 [Source:HGNC Symbol;Acc:30166]                                                         | 0.97 | 1.3E-05 |
| NOC2L    | ENSG00000188976 | nucleolar complex associated 2 homolog (S. cerevisiae) [Source:HGNC Symbol;Acc:24517]                           | 0.97 | 1.3E-05 |
| CLPB     | ENSG00000162129 | ClpB caseinolytic peptidase B homolog (E. coli) [Source:HGNC Symbol;Acc:30664]                                  | 0.92 | 1.3E-05 |
| METTL21B | ENSG00000123427 | methyltransferase like 21B [Source:HGNC Symbol;Acc:24936]                                                       | 1.51 | 1.3E-05 |
| LARS2    | ENSG00000011376 | leucyl-tRNA synthetase 2, mitochondrial [Source:HGNC Symbol;Acc:17095]                                          | 0.85 | 1.3E-05 |
| LCLAT1   | ENSG00000172954 | lysocardiolipin acyltransferase 1 [Source:HGNC Symbol;Acc:26756]                                                | 0.94 | 1.3E-05 |
| GUF1     | ENSG00000151806 | GUF1 GTPase homolog (S. cerevisiae) [Source:HGNC Symbol;Acc:25799]                                              | 0.87 | 1.4E-05 |
| WDR18    | ENSG00000065268 | WD repeat domain 18 [Source:HGNC Symbol;Acc:17956]                                                              | 1.19 | 1.4E-05 |
| RRP1     | ENSG00000160214 | ribosomal RNA processing 1 [Source:HGNC Symbol;Acc:18785]                                                       | 0.92 | 1.4E-05 |
| TTL      | ENSG00000114999 | tubulin tyrosine ligase [Source:HGNC Symbol;Acc:21586]                                                          | 0.71 | 1.4E-05 |
| ATP5I    | ENSG00000169020 | ATP synthase, H <sup>+</sup> transporting, mitochondrial Fo complex, subunit E [Source:HGNC Symbol;Acc:846]     | 0.83 | 1.4E-05 |
| ALKBH4   | ENSG00000160993 | alkB, alkylation repair homolog 4 (E. coli) [Source:HGNC Symbol;Acc:21900]                                      | 1.01 | 1.4E-05 |
| C1orf53  | ENSG00000203724 | chromosome 1 open reading frame 53 [Source:HGNC Symbol;Acc:30003]                                               | 1.45 | 1.4E-05 |
| NT5C3B   | ENSG00000141698 | 5'-nucleotidase, cytosolic IIIB [Source:HGNC Symbol;Acc:28300]                                                  | 0.86 | 1.4E-05 |
| IMPACT   | ENSG00000154059 | impact RWD domain protein [Source:HGNC Symbol;Acc:20387]                                                        | 1.04 | 1.4E-05 |
| FAM96AP2 | ENSG00000224566 | family with sequence similarity 96, member A pseudogene 2 [Source:HGNC Symbol;Acc:43862]                        | 2.43 | 1.4E-05 |
| ECT2     | ENSG00000114346 | epithelial cell transforming sequence 2 oncogene [Source:HGNC Symbol;Acc:3155]                                  | 1.08 | 1.4E-05 |

|           |                 |                                                                                     |      |         |
|-----------|-----------------|-------------------------------------------------------------------------------------|------|---------|
| SNRPD3    | ENSG00000100028 | small nuclear ribonucleoprotein D3 polypeptide 18kDa [Source:HGNC Symbol;Acc:11160] | 0.59 | 1.4E-05 |
| --        | ENSG00000268432 | Uncharacterized protein [Source:UniProtKB/TrEMBL;Acc:M0R239]                        | 1.50 | 1.5E-05 |
| CNTNAP1   | ENSG00000108797 | contactin associated protein 1 [Source:HGNC Symbol;Acc:8011]                        | 1.24 | 1.5E-05 |
| KIF27     | ENSG00000165115 | kinesin family member 27 [Source:HGNC Symbol;Acc:18632]                             | 1.29 | 1.5E-05 |
| --        | ENSG00000245330 | --                                                                                  | 2.53 | 1.5E-05 |
| RPLP1     | ENSG00000137818 | ribosomal protein, large, P1 [Source:HGNC Symbol;Acc:10372]                         | 1.06 | 1.5E-05 |
| AMER1     | ENSG00000184675 | APC membrane recruitment protein 1 [Source:HGNC Symbol;Acc:26837]                   | 1.10 | 1.5E-05 |
| SIVA1     | ENSG00000184990 | SIVA1, apoptosis-inducing factor [Source:HGNC Symbol;Acc:17712]                     | 1.18 | 1.5E-05 |
| TRIM28    | ENSG00000130726 | tripartite motif containing 28 [Source:HGNC Symbol;Acc:16384]                       | 0.99 | 1.5E-05 |
| NFYB      | ENSG00000120837 | nuclear transcription factor Y, beta [Source:HGNC Symbol;Acc:7805]                  | 0.87 | 1.5E-05 |
| NT5DC4    | ENSG00000144130 | 5'-nucleotidase domain containing 4 [Source:HGNC Symbol;Acc:27678]                  | 1.47 | 1.5E-05 |
| TMEM38A   | ENSG00000072954 | transmembrane protein 38A [Source:HGNC Symbol;Acc:28462]                            | 1.26 | 1.5E-05 |
| AFAP1-AS1 | ENSG00000272620 | AFAP1 antisense RNA 1 [Source:HGNC Symbol;Acc:28141]                                | 0.73 | 1.5E-05 |
| DDX46     | ENSG00000145833 | DEAD (Asp-Glu-Ala-Asp) box polypeptide 46 [Source:HGNC Symbol;Acc:18681]            | 0.73 | 1.6E-05 |
| CTU2      | ENSG00000174177 | cytosolic thiouridylase subunit 2 homolog (S. pombe) [Source:HGNC Symbol;Acc:28005] | 1.43 | 1.6E-05 |
| MBNL3     | ENSG00000076770 | muscleblind-like splicing regulator 3 [Source:HGNC Symbol;Acc:20564]                | 1.21 | 1.6E-05 |
| PRAC2     | ENSG00000229637 | prostate cancer susceptibility candidate 2 [Source:HGNC Symbol;Acc:30143]           | 1.69 | 1.6E-05 |
| USP10     | ENSG00000103194 | ubiquitin specific peptidase 10 [Source:HGNC Symbol;Acc:12608]                      | 0.78 | 1.6E-05 |
| --        | ENSG00000234936 | --                                                                                  | 1.53 | 1.6E-05 |
| --        | ENSG00000262026 | --                                                                                  | 0.75 | 1.6E-05 |
| WDR53     | ENSG00000185798 | WD repeat domain 53 [Source:HGNC Symbol;Acc:28786]                                  | 0.98 | 1.6E-05 |
| CD163L1   | ENSG00000177675 | CD163 molecule-like 1 [Source:HGNC Symbol;Acc:30375]                                | 0.86 | 1.6E-05 |

|           |                 |                                                                                                                 |      |         |
|-----------|-----------------|-----------------------------------------------------------------------------------------------------------------|------|---------|
| FDXACB1   | ENSG00000255561 | ferredoxin-fold anticodon binding domain containing 1 [Source:HGNC Symbol;Acc:25110]                            | 1.42 | 1.6E-05 |
| SYNM      | ENSG00000182253 | synemin, intermediate filament protein [Source:HGNC Symbol;Acc:24466]                                           | 2.18 | 1.6E-05 |
| RMND1     | ENSG00000155906 | required for meiotic nuclear division 1 homolog ( <i>S. cerevisiae</i> ) [Source:HGNC Symbol;Acc:21176]         | 0.93 | 1.6E-05 |
| LRRC6     | ENSG00000129295 | leucine rich repeat containing 6 [Source:HGNC Symbol;Acc:16725]                                                 | 0.93 | 1.7E-05 |
| --        | ENSG00000260766 | --                                                                                                              | 1.51 | 1.7E-05 |
| PHKA2-AS1 | ENSG00000237836 | PHKA2 antisense RNA 1 [Source:HGNC Symbol;Acc:44110]                                                            | 1.29 | 1.7E-05 |
| KRT10     | ENSG00000186395 | keratin 10 [Source:HGNC Symbol;Acc:6413]                                                                        | 1.00 | 1.7E-05 |
| LETMD1    | ENSG00000050426 | LETM1 domain containing 1 [Source:HGNC Symbol;Acc:24241]                                                        | 0.70 | 1.7E-05 |
| TCTN3     | ENSG00000119977 | tectonic family member 3 [Source:HGNC Symbol;Acc:24519]                                                         | 0.67 | 1.8E-05 |
| HDAC4     | ENSG00000068024 | histone deacetylase 4 [Source:HGNC Symbol;Acc:14063]                                                            | 1.00 | 1.8E-05 |
| SNX2      | ENSG00000205302 | sorting nexin 2 [Source:HGNC Symbol;Acc:11173]                                                                  | 1.00 | 1.8E-05 |
| --        | ENSG00000264112 | --                                                                                                              | 1.11 | 1.8E-05 |
| GTF3A     | ENSG00000122034 | general transcription factor IIIA [Source:HGNC Symbol;Acc:4662]                                                 | 0.73 | 1.8E-05 |
| XPOT      | ENSG00000184575 | exportin, tRNA [Source:HGNC Symbol;Acc:12826]                                                                   | 0.79 | 1.8E-05 |
| TLE2      | ENSG00000065717 | transducin-like enhancer of split 2 ( <i>E(sp1)</i> homolog, <i>Drosophila</i> ) [Source:HGNC Symbol;Acc:11838] | 1.31 | 1.8E-05 |
| XRN2      | ENSG00000088930 | 5'-3' exoribonuclease 2 [Source:HGNC Symbol;Acc:12836]                                                          | 1.00 | 1.8E-05 |
| --        | ENSG00000268788 | Uncharacterized protein [Source:UniProtKB/TrEMBL;Acc:M0R2X6]                                                    | 0.81 | 1.8E-05 |
| CHID1     | ENSG00000177830 | chitinase domain containing 1 [Source:HGNC Symbol;Acc:28474]                                                    | 0.83 | 1.8E-05 |
| NXPE4     | ENSG00000137634 | neurexophilin and PC-esterase domain family, member 4 [Source:HGNC Symbol;Acc:23117]                            | 1.34 | 1.8E-05 |
| --        | ENSG00000248810 | --                                                                                                              | 1.90 | 1.8E-05 |
| CNN3      | ENSG00000117519 | calponin 3, acidic [Source:HGNC Symbol;Acc:2157]                                                                | 0.89 | 1.9E-05 |
| DNASE2    | ENSG00000105612 | deoxyribonuclease II, lysosomal [Source:HGNC Symbol;Acc:2960]                                                   | 0.73 | 1.9E-05 |
| FOXD2-AS1 | ENSG00000237424 | FOXD2 antisense RNA 1 (head to head) [Source:HGNC Symbol;Acc:44256]                                             | 1.28 | 1.9E-05 |

|         |                 |                                                                                                                              |      |         |
|---------|-----------------|------------------------------------------------------------------------------------------------------------------------------|------|---------|
| DCP1B   | ENSG00000151065 | decapping mRNA 1B [Source:HGNC Symbol;Acc:24451]                                                                             | 0.96 | 1.9E-05 |
| TIMMDC1 | ENSG00000113845 | translocase of inner mitochondrial membrane domain containing 1 [Source:HGNC Symbol;Acc:1321]                                | 0.55 | 1.9E-05 |
| GALNT8  | ENSG00000130035 | UDP-N-acetyl-alpha-D-galactosamine:polypeptide N-acetylgalactosaminyltransferase 8 (GalNAc-T8) [Source:HGNC Symbol;Acc:4130] | 1.50 | 1.9E-05 |
| PIM2    | ENSG00000102096 | pim-2 oncogene [Source:HGNC Symbol;Acc:8987]                                                                                 | 0.72 | 1.9E-05 |
| PRRT1   | ENSG00000204314 | proline-rich transmembrane protein 1 [Source:HGNC Symbol;Acc:13943]                                                          | 1.61 | 2.0E-05 |
| ATRAID  | ENSG00000138085 | all-trans retinoic acid-induced differentiation factor [Source:HGNC Symbol;Acc:24090]                                        | 0.54 | 2.0E-05 |
| DSTYK   | ENSG00000133059 | dual serine/threonine and tyrosine protein kinase [Source:HGNC Symbol;Acc:29043]                                             | 1.15 | 2.0E-05 |
| PHF7    | ENSG00000010318 | PHD finger protein 7 [Source:HGNC Symbol;Acc:18458]                                                                          | 1.65 | 2.0E-05 |
| NUDCD1  | ENSG00000120526 | NudC domain containing 1 [Source:HGNC Symbol;Acc:24306]                                                                      | 0.96 | 2.0E-05 |
| ORC2    | ENSG00000115942 | origin recognition complex, subunit 2 [Source:HGNC Symbol;Acc:8488]                                                          | 0.78 | 2.0E-05 |
| YY2     | ENSG00000230797 | YY2 transcription factor [Source:HGNC Symbol;Acc:31684]                                                                      | 2.14 | 2.0E-05 |
| ZNF263  | ENSG00000006194 | zinc finger protein 263 [Source:HGNC Symbol;Acc:13056]                                                                       | 0.60 | 2.0E-05 |
| MPV17L2 | ENSG00000254858 | MPV17 mitochondrial membrane protein-like 2 [Source:HGNC Symbol;Acc:28177]                                                   | 1.12 | 2.0E-05 |
| ACD     | ENSG00000102977 | adrenocortical dysplasia homolog (mouse) [Source:HGNC Symbol;Acc:25070]                                                      | 1.12 | 2.1E-05 |
| C3orf70 | ENSG00000187068 | chromosome 3 open reading frame 70 [Source:HGNC Symbol;Acc:33731]                                                            | 1.29 | 2.1E-05 |
| EID2    | ENSG00000176396 | EP300 interacting inhibitor of differentiation 2 [Source:HGNC Symbol;Acc:28292]                                              | 1.00 | 2.1E-05 |
| TRMT5   | ENSG00000126814 | tRNA methyltransferase 5 [Source:HGNC Symbol;Acc:23141]                                                                      | 0.84 | 2.2E-05 |



|          |                 |                                                                                                                                  |      |         |
|----------|-----------------|----------------------------------------------------------------------------------------------------------------------------------|------|---------|
| PDHX     | ENSG00000110435 | pyruvate dehydrogenase complex, component X [Source:HGNC Symbol;Acc:21350]                                                       | 0.82 | 2.2E-05 |
| FARSA    | ENSG00000179115 | phenylalanyl-tRNA synthetase, alpha subunit [Source:HGNC Symbol;Acc:3592]                                                        | 0.95 | 2.2E-05 |
| C17orf96 | ENSG00000179294 | chromosome 17 open reading frame 96 [Source:HGNC Symbol;Acc:34493]                                                               | 1.57 | 2.2E-05 |
| CYB5A    | ENSG00000166347 | cytochrome b5 type A (microsomal) [Source:HGNC Symbol;Acc:2570]                                                                  | 0.69 | 2.2E-05 |
| ARL9     | ENSG00000196503 | ADP-ribosylation factor-like 9 [Source:HGNC Symbol;Acc:23592]                                                                    | 2.33 | 2.2E-05 |
| L3MBTL1  | ENSG00000185513 | l(3)mbt-like 1 (Drosophila) [Source:HGNC Symbol;Acc:15905]                                                                       | 0.86 | 2.2E-05 |
| SARS2    | ENSG00000104835 | seryl-tRNA synthetase 2, mitochondrial [Source:HGNC Symbol;Acc:17697]                                                            | 2.72 | 2.3E-05 |
| SMOC2    | ENSG00000112562 | SPARC related modular calcium binding 2 [Source:HGNC Symbol;Acc:20323]                                                           | 3.17 | 2.3E-05 |
| SSBP4    | ENSG00000130511 | single stranded DNA binding protein 4 [Source:HGNC Symbol;Acc:15676]                                                             | 1.36 | 2.3E-05 |
| TBRG4    | ENSG00000136270 | transforming growth factor beta regulator 4 [Source:HGNC Symbol;Acc:17443]                                                       | 0.80 | 2.3E-05 |
| SMARCD1  | ENSG00000066117 | SWI/SNF related, matrix associated, actin dependent regulator of chromatin, subfamily d, member 1 [Source:HGNC Symbol;Acc:11106] | 0.53 | 2.3E-05 |
| HOXB13   | ENSG00000159184 | homeobox B13 [Source:HGNC Symbol;Acc:5112]                                                                                       | 0.93 | 2.3E-05 |
| --       | ENSG00000227540 | --                                                                                                                               | 1.79 | 2.4E-05 |
| PDHA1    | ENSG00000131828 | pyruvate dehydrogenase (lipoamide) alpha 1 [Source:HGNC Symbol;Acc:8806]                                                         | 0.55 | 2.4E-05 |
| FAM117B  | ENSG00000138439 | family with sequence similarity 117, member B [Source:HGNC Symbol;Acc:14440]                                                     | 1.00 | 2.4E-05 |
| SLC25A14 | ENSG00000102078 | solute carrier family 25 (mitochondrial carrier, brain), member 14 [Source:HGNC Symbol;Acc:10984]                                | 0.84 | 2.4E-05 |
| MIR155HG | ENSG00000234883 | MIR155 host gene (non-protein coding) [Source:HGNC Symbol;Acc:35460]                                                             | 1.69 | 2.5E-05 |

|          |                 |                                                                                                                                    |      |         |
|----------|-----------------|------------------------------------------------------------------------------------------------------------------------------------|------|---------|
| PNPT1    | ENSG00000138035 | polyribonucleotide nucleotidyltransferase 1 [Source:HGNC Symbol;Acc:23166]                                                         | 1.03 | 2.6E-05 |
| NAP1L5   | ENSG00000177432 | nucleosome assembly protein 1-like 5 [Source:HGNC Symbol;Acc:19968]                                                                | 1.59 | 2.6E-05 |
| KIAA1731 | ENSG00000166004 | KIAA1731 [Source:HGNC Symbol;Acc:29366]                                                                                            | 0.90 | 2.6E-05 |
| UBAC1    | ENSG00000130560 | UBA domain containing 1 [Source:HGNC Symbol;Acc:30221]                                                                             | 0.84 | 2.6E-05 |
| ZNF789   | ENSG00000198556 | zinc finger protein 789 [Source:HGNC Symbol;Acc:27801]                                                                             | 0.71 | 2.6E-05 |
| MEGF8    | ENSG00000105429 | multiple EGF-like-domains 8 [Source:HGNC Symbol;Acc:3233]                                                                          | 1.08 | 2.6E-05 |
| C12orf10 | ENSG00000139637 | chromosome 12 open reading frame 10 [Source:HGNC Symbol;Acc:17590]                                                                 | 0.95 | 2.6E-05 |
| SIRT3    | ENSG00000142082 | sirtuin 3 [Source:HGNC Symbol;Acc:14931]                                                                                           | 0.70 | 2.6E-05 |
| YEATS4   | ENSG00000127337 | YEATS domain containing 4 [Source:HGNC Symbol;Acc:24859]                                                                           | 1.17 | 2.6E-05 |
| RCBTB1   | ENSG00000136144 | regulator of chromosome condensation (RCC1) and BTB (POZ) domain containing protein 1 [Source:HGNC Symbol;Acc:18243]               | 1.55 | 2.6E-05 |
| CBX3     | ENSG00000122565 | chromobox homolog 3 [Source:HGNC Symbol;Acc:1553]                                                                                  | 0.88 | 2.7E-05 |
| ODF2-AS1 | ENSG00000225951 | ODF2 antisense RNA 1 [Source:HGNC Symbol;Acc:49461]                                                                                | 1.35 | 2.7E-05 |
| PARP16   | ENSG00000138617 | poly (ADP-ribose) polymerase family, member 16 [Source:HGNC Symbol;Acc:26040]                                                      | 1.06 | 2.7E-05 |
| MOAP1    | ENSG00000165943 | modulator of apoptosis 1 [Source:HGNC Symbol;Acc:16658]                                                                            | 0.72 | 2.7E-05 |
| SLC35E3  | ENSG00000175782 | solute carrier family 35, member E3 [Source:HGNC Symbol;Acc:20864]                                                                 | 0.90 | 2.7E-05 |
| KBTBD8   | ENSG00000163376 | kelch repeat and BTB (POZ) domain containing 8 [Source:HGNC Symbol;Acc:30691]                                                      | 1.91 | 2.8E-05 |
| RFX7     | ENSG00000181827 | regulatory factor X, 7 [Source:HGNC Symbol;Acc:25777]                                                                              | 0.86 | 2.8E-05 |
| MTHFD2   | ENSG00000065911 | methylenetetrahydrofolate dehydrogenase (NADP+ dependent) 2, methenyltetrahydrofolate cyclohydrolase [Source:HGNC Symbol;Acc:7434] | 0.74 | 2.8E-05 |
| C6orf203 | ENSG00000130349 | chromosome 6 open reading frame 203 [Source:HGNC Symbol;Acc:17971]                                                                 | 0.82 | 2.8E-05 |

|             |                 |                                                                                                                       |      |         |
|-------------|-----------------|-----------------------------------------------------------------------------------------------------------------------|------|---------|
| --          | ENSG00000271524 | --                                                                                                                    | 2.41 | 2.8E-05 |
| STIL        | ENSG00000123473 | SCL/TAL1 interrupting locus [Source:HGNC Symbol;Acc:10879]                                                            | 0.63 | 2.8E-05 |
| --          | ENSG00000267002 | --                                                                                                                    | 1.48 | 2.9E-05 |
| RPS16       | ENSG00000105193 | ribosomal protein S16 [Source:HGNC Symbol;Acc:10396]                                                                  | 0.83 | 2.9E-05 |
| PPID        | ENSG00000171497 | peptidylprolyl isomerase D [Source:HGNC Symbol;Acc:9257]                                                              | 0.69 | 2.9E-05 |
| FAM178A     | ENSG00000119906 | family with sequence similarity 178, member A [Source:HGNC Symbol;Acc:17814]                                          | 0.68 | 2.9E-05 |
| GLT8D1      | ENSG00000016864 | glycosyltransferase 8 domain containing 1 [Source:HGNC Symbol;Acc:24870]                                              | 0.64 | 2.9E-05 |
| --          | ENSG00000270332 | --                                                                                                                    | 3.10 | 2.9E-05 |
| --          | ENSG00000261845 | --                                                                                                                    | 0.74 | 2.9E-05 |
| RAC3        | ENSG00000169750 | ras-related C3 botulinum toxin substrate 3 (rho family, small GTP binding protein Rac3) [Source:HGNC Symbol;Acc:9803] | 1.36 | 2.9E-05 |
| SLC16A1-AS1 | ENSG00000226419 | SLC16A1 antisense RNA 1 [Source:HGNC Symbol;Acc:49445]                                                                | 1.80 | 2.9E-05 |
| MRPL47      | ENSG00000136522 | mitochondrial ribosomal protein L47 [Source:HGNC Symbol;Acc:16652]                                                    | 0.69 | 2.9E-05 |
| ADARB1      | ENSG00000197381 | adenosine deaminase, RNA-specific, B1 [Source:HGNC Symbol;Acc:226]                                                    | 1.08 | 2.9E-05 |
| MAP10       | ENSG00000212916 | microtubule-associated protein 10 [Source:HGNC Symbol;Acc:29265]                                                      | 1.53 | 2.9E-05 |
| C6orf201    | ENSG00000185689 | chromosome 6 open reading frame 201 [Source:HGNC Symbol;Acc:21620]                                                    | 1.38 | 2.9E-05 |
| ATP5G2      | ENSG00000135390 | ATP synthase, H+ transporting, mitochondrial Fo complex, subunit C2 (subunit 9) [Source:HGNC Symbol;Acc:842]          | 0.86 | 3.0E-05 |
| --          | ENSG00000270135 | --                                                                                                                    | 3.12 | 3.0E-05 |
| SMPDL3B     | ENSG00000130768 | sphingomyelin phosphodiesterase, acid-like 3B [Source:HGNC Symbol;Acc:21416]                                          | 0.72 | 3.0E-05 |
| DDX54       | ENSG00000123064 | DEAD (Asp-Glu-Ala-Asp) box polypeptide 54 [Source:HGNC Symbol;Acc:20084]                                              | 0.97 | 3.0E-05 |
| CSRP2BP     | ENSG00000149474 | CSRP2 binding protein [Source:HGNC Symbol;Acc:15904]                                                                  | 1.07 | 3.0E-05 |

|          |                 |                                                                                        |      |         |
|----------|-----------------|----------------------------------------------------------------------------------------|------|---------|
| ZCCHC7   | ENSG00000147905 | zinc finger, CCHC domain containing 7 [Source:HGNC Symbol;Acc:26209]                   | 0.88 | 3.0E-05 |
| ATP6V1E2 | ENSG00000250565 | ATPase, H+ transporting, lysosomal 31kDa, V1 subunit E2 [Source:HGNC Symbol;Acc:18125] | 1.32 | 3.0E-05 |
| RAB40A   | ENSG00000172476 | RAB40A, member RAS oncogene family [Source:HGNC Symbol;Acc:18283]                      | 1.94 | 3.0E-05 |
| RPP14    | ENSG00000163684 | ribonuclease P/MRP 14kDa subunit [Source:HGNC Symbol;Acc:30327]                        | 0.67 | 3.0E-05 |
| GPC2     | ENSG00000213420 | glypican 2 [Source:HGNC Symbol;Acc:4450]                                               | 2.09 | 3.1E-05 |
| SRRM5    | ENSG00000226763 | serine/arginine repetitive matrix 5 [Source:HGNC Symbol;Acc:37248]                     | 1.28 | 3.1E-05 |
| MESP1    | ENSG00000166823 | mesoderm posterior 1 homolog (mouse) [Source:HGNC Symbol;Acc:29658]                    | 2.08 | 3.1E-05 |
| TLL2     | ENSG00000120440 | tubulin tyrosine ligase-like family, member 2 [Source:HGNC Symbol;Acc:21211]           | 2.44 | 3.1E-05 |
| --       | ENSG00000228172 | --                                                                                     | 0.77 | 3.1E-05 |
| KLF11    | ENSG00000172059 | Kruppel-like factor 11 [Source:HGNC Symbol;Acc:11811]                                  | 0.77 | 3.2E-05 |
| NUP85    | ENSG00000125450 | nucleoporin 85kDa [Source:HGNC Symbol;Acc:8734]                                        | 0.61 | 3.2E-05 |
| --       | ENSG00000261088 | --                                                                                     | 1.02 | 3.2E-05 |
| CDCA3    | ENSG00000111665 | cell division cycle associated 3 [Source:HGNC Symbol;Acc:14624]                        | 0.67 | 3.3E-05 |
| CD27     | ENSG00000139193 | CD27 molecule [Source:HGNC Symbol;Acc:11922]                                           | 1.31 | 3.3E-05 |
| LRRC2    | ENSG00000163827 | leucine rich repeat containing 2 [Source:HGNC Symbol;Acc:14676]                        | 3.25 | 3.3E-05 |
| IL17RD   | ENSG00000144730 | interleukin 17 receptor D [Source:HGNC Symbol;Acc:17616]                               | 1.05 | 3.3E-05 |
| --       | ENSG00000203602 | --                                                                                     | 0.98 | 3.3E-05 |
| STAB2    | ENSG00000136011 | stabilin 2 [Source:HGNC Symbol;Acc:18629]                                              | 1.74 | 3.4E-05 |
| CBY1     | ENSG00000100211 | chibby homolog 1 (Drosophila) [Source:HGNC Symbol;Acc:1307]                            | 0.77 | 3.4E-05 |
| --       | ENSG00000232640 | --                                                                                     | 2.33 | 3.4E-05 |
| NR2C2AP  | ENSG00000184162 | nuclear receptor 2C2-associated protein [Source:HGNC Symbol;Acc:30763]                 | 0.88 | 3.4E-05 |

|           |                 |                                                                              |      |         |
|-----------|-----------------|------------------------------------------------------------------------------|------|---------|
| SRSF8     | ENSG00000180771 | serine/arginine-rich splicing factor 8 [Source:HGNC Symbol;Acc:16988]        | 0.82 | 3.4E-05 |
| --        | ENSG00000234072 | --                                                                           | 0.72 | 3.5E-05 |
| FAM185A   | ENSG00000222011 | family with sequence similarity 185, member A [Source:HGNC Symbol;Acc:22412] | 1.13 | 3.5E-05 |
| ANKRD46   | ENSG00000186106 | ankyrin repeat domain 46 [Source:HGNC Symbol;Acc:27229]                      | 1.04 | 3.5E-05 |
| ZNF174    | ENSG00000103343 | zinc finger protein 174 [Source:HGNC Symbol;Acc:12963]                       | 1.04 | 3.5E-05 |
| GPX1      | ENSG00000233276 | glutathione peroxidase 1 [Source:HGNC Symbol;Acc:4553]                       | 1.01 | 3.6E-05 |
| CCND2-AS1 | ENSG00000256164 | CCND2 antisense RNA 1 [Source:HGNC Symbol;Acc:49398]                         | 1.76 | 3.6E-05 |
| RPL13     | ENSG00000167526 | ribosomal protein L13 [Source:HGNC Symbol;Acc:10303]                         | 1.05 | 3.6E-05 |
| ZNF689    | ENSG00000156853 | zinc finger protein 689 [Source:HGNC Symbol;Acc:25173]                       | 0.76 | 3.6E-05 |
| GHDC      | ENSG00000167925 | GH3 domain containing [Source:HGNC Symbol;Acc:24438]                         | 1.00 | 3.6E-05 |
| FAM201A   | ENSG00000204860 | family with sequence similarity 201, member A [Source:HGNC Symbol;Acc:27239] | 2.92 | 3.6E-05 |
| DDX11-AS1 | ENSG00000245614 | DDX11 antisense RNA 1 [Source:HGNC Symbol;Acc:44176]                         | 2.53 | 3.6E-05 |
| KRTCAP3   | ENSG00000157992 | keratinocyte associated protein 3 [Source:HGNC Symbol;Acc:28943]             | 0.71 | 3.7E-05 |
| CCDC78    | ENSG00000162004 | coiled-coil domain containing 78 [Source:HGNC Symbol;Acc:14153]              | 1.49 | 3.7E-05 |
| ISX       | ENSG00000175329 | intestine-specific homeobox [Source:HGNC Symbol;Acc:28084]                   | 2.60 | 3.7E-05 |
| --        | ENSG00000240449 | --                                                                           | 1.57 | 3.7E-05 |
| NT5M      | ENSG00000205309 | 5',3'-nucleotidase, mitochondrial [Source:HGNC Symbol;Acc:15769]             | 3.23 | 3.7E-05 |
| --        | ENSG00000273398 | Calcineurin subunit B type 1 [Source:UniProtKB/TrEMBL;Acc:H7BYZ3]            | 1.41 | 3.7E-05 |
| WDR46     | ENSG00000227057 | WD repeat domain 46 [Source:HGNC Symbol;Acc:13923]                           | 0.88 | 3.7E-05 |
| IMPDH1    | ENSG00000106348 | IMP (inosine 5'-monophosphate) dehydrogenase 1 [Source:HGNC Symbol;Acc:6052] | 0.84 | 3.7E-05 |
| ARL15     | ENSG00000185305 | ADP-ribosylation factor-like 15 [Source:HGNC Symbol;Acc:25945]               | 1.04 | 3.8E-05 |
| C8orf59   | ENSG00000176731 | chromosome 8 open reading frame 59 [Source:HGNC Symbol;Acc:32235]            | 0.86 | 3.8E-05 |

|          |                 |                                                                                                             |      |         |
|----------|-----------------|-------------------------------------------------------------------------------------------------------------|------|---------|
| TAF1D    | ENSG00000166012 | TATA box binding protein (TBP)-associated factor, RNA polymerase I, D, 41kDa [Source:HGNC Symbol;Acc:28759] | 0.85 | 3.8E-05 |
| UPF3B    | ENSG00000125351 | UPF3 regulator of nonsense transcripts homolog B (yeast) [Source:HGNC Symbol;Acc:20439]                     | 0.73 | 3.8E-05 |
| SLC25A40 | ENSG00000075303 | solute carrier family 25, member 40 [Source:HGNC Symbol;Acc:29680]                                          | 1.06 | 3.8E-05 |
| CCDC14   | ENSG00000175455 | coiled-coil domain containing 14 [Source:HGNC Symbol;Acc:25766]                                             | 0.88 | 3.8E-05 |
| TTC3     | ENSG00000182670 | tetratricopeptide repeat domain 3 [Source:HGNC Symbol;Acc:12393]                                            | 0.57 | 3.8E-05 |
| RHPN1    | ENSG00000158106 | rhopilin, Rho GTPase binding protein 1 [Source:HGNC Symbol;Acc:19973]                                       | 1.14 | 3.8E-05 |
| RMDN2    | ENSG00000115841 | regulator of microtubule dynamics 2 [Source:HGNC Symbol;Acc:26567]                                          | 1.71 | 3.8E-05 |
| UCHL5    | ENSG00000116750 | ubiquitin carboxyl-terminal hydrolase L5 [Source:HGNC Symbol;Acc:19678]                                     | 0.82 | 3.9E-05 |
| SETDB2   | ENSG00000136169 | SET domain, bifurcated 2 [Source:HGNC Symbol;Acc:20263]                                                     | 1.01 | 3.9E-05 |
| EVL      | ENSG00000196405 | Enah/Vasp-like [Source:HGNC Symbol;Acc:20234]                                                               | 1.40 | 3.9E-05 |
| MBOAT1   | ENSG00000172197 | membrane bound O-acyltransferase domain containing 1 [Source:HGNC Symbol;Acc:21579]                         | 0.70 | 4.0E-05 |
| FOXJ1    | ENSG00000129654 | forkhead box J1 [Source:HGNC Symbol;Acc:3816]                                                               | 3.10 | 4.0E-05 |
| FRAT1    | ENSG00000165879 | frequently rearranged in advanced T-cell lymphomas [Source:HGNC Symbol;Acc:3944]                            | 1.32 | 4.0E-05 |
| DOLK     | ENSG00000175283 | dolichol kinase [Source:HGNC Symbol;Acc:23406]                                                              | 0.87 | 4.0E-05 |
| NDUFV1   | ENSG00000167792 | NADH dehydrogenase (ubiquinone) flavoprotein 1, 51kDa [Source:HGNC Symbol;Acc:7716]                         | 0.97 | 4.1E-05 |
| MATR3    | ENSG00000015479 | matrin 3 [Source:HGNC Symbol;Acc:6912]                                                                      | 0.86 | 4.1E-05 |
| SPINK4   | ENSG00000122711 | serine peptidase inhibitor, Kazal type 4 [Source:HGNC Symbol;Acc:16646]                                     | 1.48 | 4.1E-05 |
| --       | ENSG00000236935 | --                                                                                                          | 1.80 | 4.1E-05 |
| NUP54    | ENSG00000138750 | nucleoporin 54kDa [Source:HGNC Symbol;Acc:17359]                                                            | 0.88 | 4.1E-05 |

|         |                 |                                                                                                  |      |         |
|---------|-----------------|--------------------------------------------------------------------------------------------------|------|---------|
| COG2    | ENSG00000135775 | component of oligomeric golgi complex 2 [Source:HGNC Symbol;Acc:6546]                            | 0.70 | 4.1E-05 |
| MTHFD2L | ENSG00000163738 | methylenetetrahydrofolate dehydrogenase (NADP+ dependent) 2-like [Source:HGNC Symbol;Acc:31865]  | 1.22 | 4.1E-05 |
| --      | ENSG00000197062 | --                                                                                               | 1.46 | 4.2E-05 |
| CASD1   | ENSG00000127995 | CAS1 domain containing 1 [Source:HGNC Symbol;Acc:16014]                                          | 1.12 | 4.2E-05 |
| NAA38   | ENSG00000128534 | N(alpha)-acetyltransferase 38, NatC auxiliary subunit [Source:HGNC Symbol;Acc:20471]             | 0.72 | 4.2E-05 |
| --      | ENSG00000234753 | --                                                                                               | 2.48 | 4.3E-05 |
| COX14   | ENSG00000178449 | cytochrome c oxidase assembly homolog 14 ( <i>S. cerevisiae</i> ) [Source:HGNC Symbol;Acc:28216] | 0.68 | 4.3E-05 |
| TRIM7   | ENSG00000146054 | tripartite motif containing 7 [Source:HGNC Symbol;Acc:16278]                                     | 0.92 | 4.3E-05 |
| ZNF502  | ENSG00000196653 | zinc finger protein 502 [Source:HGNC Symbol;Acc:23718]                                           | 1.01 | 4.3E-05 |
| --      | ENSG00000227619 | --                                                                                               | 1.27 | 4.4E-05 |
| RNF220  | ENSG00000187147 | ring finger protein 220 [Source:HGNC Symbol;Acc:25552]                                           | 0.62 | 4.4E-05 |
| SMN2    | ENSG00000205571 | survival of motor neuron 2, centromeric [Source:HGNC Symbol;Acc:11118]                           | 1.02 | 4.4E-05 |
| MTERFD3 | ENSG00000120832 | MTERF domain containing 3 [Source:HGNC Symbol;Acc:30779]                                         | 1.05 | 4.4E-05 |
| MRPS5   | ENSG00000144029 | mitochondrial ribosomal protein S5 [Source:HGNC Symbol;Acc:14498]                                | 0.57 | 4.4E-05 |
| DPH7    | ENSG00000148399 | diphthamide biosynthesis 7 [Source:HGNC Symbol;Acc:25199]                                        | 0.95 | 4.4E-05 |
| DEPDC7  | ENSG00000121690 | DEP domain containing 7 [Source:HGNC Symbol;Acc:29899]                                           | 1.14 | 4.4E-05 |
| PYCR2   | ENSG00000143811 | pyrroline-5-carboxylate reductase family, member 2 [Source:HGNC Symbol;Acc:30262]                | 0.72 | 4.5E-05 |
| IFRD2   | ENSG00000214706 | interferon-related developmental regulator 2 [Source:HGNC Symbol;Acc:5457]                       | 0.85 | 4.6E-05 |
| BBS2    | ENSG00000125124 | Bardet-Biedl syndrome 2 [Source:HGNC Symbol;Acc:967]                                             | 0.68 | 4.6E-05 |
| FAM173B | ENSG00000150756 | family with sequence similarity 173, member B [Source:HGNC Symbol;Acc:27029]                     | 0.84 | 4.6E-05 |

|         |                 |                                                                                                |      |         |
|---------|-----------------|------------------------------------------------------------------------------------------------|------|---------|
| OXNAD1  | ENSG00000154814 | oxidoreductase NAD-binding domain containing 1 [Source:HGNC Symbol;Acc:25128]                  | 0.64 | 4.6E-05 |
| ERI2    | ENSG00000196678 | ERI1 exoribonuclease family member 2 [Source:HGNC Symbol;Acc:30541]                            | 0.82 | 4.6E-05 |
| FHAD1   | ENSG00000142621 | forkhead-associated (FHA) phosphopeptide binding domain 1 [Source:HGNC Symbol;Acc:29408]       | 1.10 | 4.7E-05 |
| IPO11   | ENSG00000086200 | importin 11 [Source:HGNC Symbol;Acc:20628]                                                     | 1.28 | 4.7E-05 |
| G3BP1   | ENSG00000145907 | GTPase activating protein (SH3 domain) binding protein 1 [Source:HGNC Symbol;Acc:30292]        | 0.82 | 4.7E-05 |
| JARID2  | ENSG00000008083 | jumonji, AT rich interactive domain 2 [Source:HGNC Symbol;Acc:6196]                            | 0.93 | 4.7E-05 |
| TGFB1   | ENSG00000105329 | transforming growth factor, beta 1 [Source:HGNC Symbol;Acc:11766]                              | 0.76 | 4.8E-05 |
| SMIM13  | ENSG00000224531 | small integral membrane protein 13 [Source:HGNC Symbol;Acc:27356]                              | 0.80 | 4.8E-05 |
| --      | ENSG00000222493 | Y RNA [Source:RFAM;Acc:RF00019]                                                                | 3.04 | 4.8E-05 |
| --      | ENSG00000228703 | --                                                                                             | 1.13 | 4.8E-05 |
| TMEM209 | ENSG00000146842 | transmembrane protein 209 [Source:HGNC Symbol;Acc:21898]                                       | 0.91 | 4.9E-05 |
| ELK1    | ENSG00000126767 | ELK1, member of ETS oncogene family [Source:HGNC Symbol;Acc:3321]                              | 0.78 | 4.9E-05 |
| MRPL15  | ENSG00000137547 | mitochondrial ribosomal protein L15 [Source:HGNC Symbol;Acc:14054]                             | 0.59 | 4.9E-05 |
| GTF3C4  | ENSG00000125484 | general transcription factor IIIC, polypeptide 4, 90kDa [Source:HGNC Symbol;Acc:4667]          | 0.95 | 4.9E-05 |
| OGFOD3  | ENSG00000181396 | 2-oxoglutarate and iron-dependent oxygenase domain containing 3 [Source:HGNC Symbol;Acc:26174] | 1.01 | 4.9E-05 |
| SH2D2A  | ENSG00000027869 | SH2 domain containing 2A [Source:HGNC Symbol;Acc:10821]                                        | 1.25 | 4.9E-05 |
| C9orf43 | ENSG00000157653 | chromosome 9 open reading frame 43 [Source:HGNC Symbol;Acc:23570]                              | 1.48 | 5.0E-05 |



|         |                 |                                                                                                                     |      |         |
|---------|-----------------|---------------------------------------------------------------------------------------------------------------------|------|---------|
| POLR3A  | ENSG00000148606 | polymerase (RNA) III (DNA directed) polypeptide A, 155kDa<br>[Source:HGNC Symbol;Acc:30074]                         | 0.74 | 5.0E-05 |
| --      | ENSG00000255252 | --                                                                                                                  | 0.77 | 5.0E-05 |
| TRUB1   | ENSG00000165832 | TruB pseudouridine (psi) synthase family member 1 [Source:HGNC<br>Symbol;Acc:16060]                                 | 1.23 | 5.0E-05 |
| RPL41   | ENSG00000229117 | ribosomal protein L41 [Source:HGNC Symbol;Acc:10354]                                                                | 0.60 | 5.0E-05 |
| L3HYPDH | ENSG00000126790 | L-3-hydroxyproline dehydratase (trans-) [Source:HGNC<br>Symbol;Acc:20488]                                           | 1.03 | 5.0E-05 |
| VPRBP   | ENSG00000145041 | Vpr (HIV-1) binding protein [Source:HGNC Symbol;Acc:30911]                                                          | 0.62 | 5.0E-05 |
| KHDRBS3 | ENSG00000131773 | KH domain containing, RNA binding, signal transduction associated 3<br>[Source:HGNC Symbol;Acc:18117]               | 0.68 | 5.0E-05 |
| --      | ENSG00000264538 | --                                                                                                                  | 1.08 | 5.1E-05 |
| DIS3L2  | ENSG00000144535 | DIS3 mitotic control homolog ( <i>S. cerevisiae</i> )-like 2 [Source:HGNC<br>Symbol;Acc:28648]                      | 0.77 | 5.1E-05 |
| MORC4   | ENSG00000133131 | MORC family CW-type zinc finger 4 [Source:HGNC Symbol;Acc:23485]                                                    | 0.67 | 5.2E-05 |
| KISS1R  | ENSG00000116014 | KISS1 receptor [Source:HGNC Symbol;Acc:4510]                                                                        | 1.63 | 5.2E-05 |
| NDUFS3  | ENSG00000213619 | NADH dehydrogenase (ubiquinone) Fe-S protein 3, 30kDa (NADH-<br>coenzyme Q reductase) [Source:HGNC Symbol;Acc:7710] | 0.69 | 5.3E-05 |
| NPFFR1  | ENSG00000148734 | neuropeptide FF receptor 1 [Source:HGNC Symbol;Acc:17425]                                                           | 3.02 | 5.3E-05 |
| --      | ENSG00000226539 | --                                                                                                                  | 0.88 | 5.4E-05 |
| --      | ENSG00000255118 | --                                                                                                                  | 2.01 | 5.4E-05 |
| MRPS34  | ENSG00000074071 | mitochondrial ribosomal protein S34 [Source:HGNC<br>Symbol;Acc:16618]                                               | 1.02 | 5.4E-05 |
| KIF7    | ENSG00000166813 | kinesin family member 7 [Source:HGNC Symbol;Acc:30497]                                                              | 1.89 | 5.5E-05 |
| GEMIN7  | ENSG00000142252 | gem (nuclear organelle) associated protein 7 [Source:HGNC<br>Symbol;Acc:20045]                                      | 0.76 | 5.5E-05 |
| RASIP1  | ENSG00000105538 | Ras interacting protein 1 [Source:HGNC Symbol;Acc:24716]                                                            | 1.27 | 5.5E-05 |
| --      | ENSG00000261123 | --                                                                                                                  | 0.91 | 5.5E-05 |

|           |                 |                                                                                                              |      |         |
|-----------|-----------------|--------------------------------------------------------------------------------------------------------------|------|---------|
| LEPRE1    | ENSG00000117385 | leucine proline-enriched proteoglycan (leprecan) 1 [Source:HGNC Symbol;Acc:19316]                            | 1.81 | 5.5E-05 |
| CRIP3     | ENSG00000146215 | cysteine-rich protein 3 [Source:HGNC Symbol;Acc:17751]                                                       | 1.82 | 5.6E-05 |
| CAAP1     | ENSG00000120159 | caspase activity and apoptosis inhibitor 1 [Source:HGNC Symbol;Acc:25834]                                    | 0.92 | 5.6E-05 |
| --        | ENSG00000239213 | --                                                                                                           | 1.19 | 5.6E-05 |
| ATP5F1    | ENSG00000116459 | ATP synthase, H+ transporting, mitochondrial Fo complex, subunit B1 [Source:HGNC Symbol;Acc:840]             | 0.53 | 5.6E-05 |
| CCDC102A  | ENSG00000135736 | coiled-coil domain containing 102A [Source:HGNC Symbol;Acc:28097]                                            | 2.49 | 5.7E-05 |
| UBA5      | ENSG00000081307 | ubiquitin-like modifier activating enzyme 5 [Source:HGNC Symbol;Acc:23230]                                   | 0.91 | 5.7E-05 |
| MTX3      | ENSG00000177034 | metaxin 3 [Source:HGNC Symbol;Acc:24812]                                                                     | 1.89 | 5.7E-05 |
| --        | ENSG00000255521 | --                                                                                                           | 1.85 | 5.8E-05 |
| STX18-AS1 | ENSG00000247708 | STX18 antisense RNA 1 (head to head) [Source:HGNC Symbol;Acc:48877]                                          | 2.32 | 5.8E-05 |
| DBI       | ENSG00000155368 | diazepam binding inhibitor (GABA receptor modulator, acyl-CoA binding protein) [Source:HGNC Symbol;Acc:2690] | 0.71 | 5.8E-05 |
| IQCB1     | ENSG00000173226 | IQ motif containing B1 [Source:HGNC Symbol;Acc:28949]                                                        | 0.78 | 5.8E-05 |
| AIMP1     | ENSG00000164022 | aminoacyl tRNA synthetase complex-interacting multifunctional protein 1 [Source:HGNC Symbol;Acc:10648]       | 0.66 | 5.9E-05 |
| SCO1      | ENSG00000133028 | SCO1 cytochrome c oxidase assembly protein [Source:HGNC Symbol;Acc:10603]                                    | 0.62 | 5.9E-05 |
| PTAR1     | ENSG00000188647 | protein prenyltransferase alpha subunit repeat containing 1 [Source:HGNC Symbol;Acc:30449]                   | 0.96 | 5.9E-05 |
| CCT8      | ENSG00000156261 | chaperonin containing TCP1, subunit 8 (theta) [Source:HGNC Symbol;Acc:1623]                                  | 0.52 | 5.9E-05 |
| AMZ2      | ENSG00000196704 | archaelysin family metallopeptidase 2 [Source:HGNC Symbol;Acc:28041]                                         | 0.62 | 6.0E-05 |

|            |                 |                                                                                                                            |      |         |
|------------|-----------------|----------------------------------------------------------------------------------------------------------------------------|------|---------|
| --         | ENSG00000267791 | --                                                                                                                         | 1.74 | 6.0E-05 |
| CDX2       | ENSG00000165556 | caudal type homeobox 2 [Source:HGNC Symbol;Acc:1806]<br>NOP2/Sun domain family, member 4 [Source:HGNC<br>Symbol;Acc:31802] | 0.76 | 6.0E-05 |
| NSUN4      | ENSG00000117481 | cytidine and dCMP deaminase domain containing 1 [Source:HGNC<br>Symbol;Acc:20299]                                          | 0.74 | 6.1E-05 |
| CDADC1     | ENSG00000102543 | calcium modulating ligand [Source:HGNC Symbol;Acc:1471]                                                                    | 0.98 | 6.1E-05 |
| CAMLG      | ENSG00000164615 | B-cell CLL/lymphoma 7A [Source:HGNC Symbol;Acc:1004]                                                                       | 0.75 | 6.3E-05 |
| BCL7A      | ENSG00000110987 | extended synaptotagmin-like protein 3 [Source:HGNC<br>Symbol;Acc:24295]                                                    | 0.79 | 6.3E-05 |
| ESYT3      | ENSG00000158220 | DNA methyltransferase 1 associated protein 1 [Source:HGNC<br>Symbol;Acc:18291]                                             | 2.00 | 6.3E-05 |
| DMAP1      | ENSG00000178028 | coiled-coil domain containing 84 [Source:HGNC Symbol;Acc:30460]                                                            | 0.82 | 6.3E-05 |
| CCDC84     | ENSG00000186166 | ENTPD1 antisense RNA 1 [Source:HGNC Symbol;Acc:45203]                                                                      | 0.76 | 6.4E-05 |
| ENTPD1-AS1 | ENSG00000226688 | LSM7 homolog, U6 small nuclear RNA associated ( <i>S. cerevisiae</i> )<br>[Source:HGNC Symbol;Acc:20470]                   | 1.55 | 6.4E-05 |
| LSM7       | ENSG00000130332 | calcium homeostasis endoplasmic reticulum protein [Source:HGNC<br>Symbol;Acc:16930]                                        | 0.91 | 6.4E-05 |
| CHERP      | ENSG00000085872 | EF-hand domain (C-terminal) containing 2 [Source:HGNC<br>Symbol;Acc:26233]                                                 | 0.64 | 6.5E-05 |
| EFHC2      | ENSG00000183690 | low density lipoprotein receptor-related protein 3 [Source:HGNC<br>Symbol;Acc:6695]                                        | 2.01 | 6.5E-05 |
| LRP3       | ENSG00000130881 | nucleoporin 62kDa [Source:HGNC Symbol;Acc:8066]                                                                            | 1.94 | 6.5E-05 |
| NUP62      | ENSG00000213024 | elaC ribonuclease Z 2 [Source:HGNC Symbol;Acc:14198]                                                                       | 0.62 | 6.6E-05 |
| ELAC2      | ENSG00000006744 | PAXIP1 antisense RNA 2 [Source:HGNC Symbol;Acc:48958]                                                                      | 0.74 | 6.6E-05 |
| PAXIP1-AS2 | ENSG00000214106 | mediator complex subunit 30 [Source:HGNC Symbol;Acc:23032]                                                                 | 0.87 | 6.6E-05 |
| MED30      | ENSG00000164758 | isocitrate dehydrogenase 3 (NAD+) beta [Source:HGNC<br>Symbol;Acc:5385]                                                    | 0.96 | 6.6E-05 |
| IDH3B      | ENSG00000101365 |                                                                                                                            | 0.71 | 6.7E-05 |

|           |                 |                                                                                                 |      |         |
|-----------|-----------------|-------------------------------------------------------------------------------------------------|------|---------|
| EBAG9     | ENSG00000147654 | estrogen receptor binding site associated, antigen, 9 [Source:HGNC Symbol;Acc:3123]             | 0.84 | 6.7E-05 |
| FAM208B   | ENSG00000108021 | family with sequence similarity 208, member B [Source:HGNC Symbol;Acc:23484]                    | 0.91 | 6.7E-05 |
| RNF144B   | ENSG00000137393 | ring finger protein 144B [Source:HGNC Symbol;Acc:21578]                                         | 1.87 | 6.7E-05 |
| --        | ENSG00000259933 | --                                                                                              | 0.94 | 6.8E-05 |
| --        | ENSG00000262136 | --                                                                                              | 1.17 | 6.8E-05 |
| C14orf144 | ENSG00000228032 | chromosome 14 open reading frame 144 [Source:HGNC Symbol;Acc:20358]                             | 1.17 | 6.9E-05 |
| TCERG1    | ENSG00000113649 | transcription elongation regulator 1 [Source:HGNC Symbol;Acc:15630]                             | 0.71 | 6.9E-05 |
| FKBP4     | ENSG00000004478 | FK506 binding protein 4, 59kDa [Source:HGNC Symbol;Acc:3720]                                    | 0.72 | 6.9E-05 |
| --        | ENSG00000219665 | --                                                                                              | 1.38 | 6.9E-05 |
| ZNF780B   | ENSG00000128000 | zinc finger protein 780B [Source:HGNC Symbol;Acc:33109]                                         | 1.09 | 6.9E-05 |
| MTRR      | ENSG00000124275 | 5-methyltetrahydrofolate-homocysteine methyltransferase reductase [Source:HGNC Symbol;Acc:7473] | 0.66 | 7.0E-05 |
| TNNC2     | ENSG00000101470 | troponin C type 2 (fast) [Source:HGNC Symbol;Acc:11944]                                         | 1.11 | 7.0E-05 |
| CD302     | ENSG00000241399 | CD302 molecule [Source:HGNC Symbol;Acc:30843]                                                   | 0.77 | 7.0E-05 |
| MRPL22    | ENSG00000082515 | mitochondrial ribosomal protein L22 [Source:HGNC Symbol;Acc:14480]                              | 0.62 | 7.2E-05 |
| MINA      | ENSG00000170854 | MYC induced nuclear antigen [Source:HGNC Symbol;Acc:19441]                                      | 0.75 | 7.2E-05 |
| YBX3      | ENSG00000060138 | Y box binding protein 3 [Source:HGNC Symbol;Acc:2428]                                           | 0.52 | 7.4E-05 |
| CBR1      | ENSG00000159228 | carbonyl reductase 1 [Source:HGNC Symbol;Acc:1548]                                              | 0.63 | 7.5E-05 |
| PPIA      | ENSG00000196262 | peptidylprolyl isomerase A (cyclophilin A) [Source:HGNC Symbol;Acc:9253]                        | 0.56 | 7.5E-05 |
| GMCL1     | ENSG00000087338 | germ cell-less, spermatogenesis associated 1 [Source:HGNC Symbol;Acc:23843]                     | 0.93 | 7.5E-05 |
| TASP1     | ENSG00000089123 | taspase, threonine aspartase, 1 [Source:HGNC Symbol;Acc:15859]                                  | 0.78 | 7.5E-05 |

|         |                 |                                                                                                                            |      |         |
|---------|-----------------|----------------------------------------------------------------------------------------------------------------------------|------|---------|
| SNAPC1  | ENSG00000023608 | small nuclear RNA activating complex, polypeptide 1, 43kDa<br>[Source:HGNC Symbol;Acc:11134]                               | 1.22 | 7.5E-05 |
| GAL     | ENSG00000069482 | galanin/GMAP prepropeptide [Source:HGNC Symbol;Acc:4114]                                                                   | 1.27 | 7.6E-05 |
| SETD6   | ENSG00000103037 | SET domain containing 6 [Source:HGNC Symbol;Acc:26116]                                                                     | 0.76 | 7.6E-05 |
| CARD8   | ENSG00000105483 | caspase recruitment domain family, member 8 [Source:HGNC<br>Symbol;Acc:17057]                                              | 1.43 | 7.6E-05 |
| TTI2    | ENSG00000129696 | TELO2 interacting protein 2 [Source:HGNC Symbol;Acc:26262]                                                                 | 0.78 | 7.8E-05 |
| KCNN2   | ENSG00000080709 | potassium intermediate/small conductance calcium-activated<br>channel, subfamily N, member 2 [Source:HGNC Symbol;Acc:6291] | 2.72 | 7.8E-05 |
| ZNF639  | ENSG00000121864 | zinc finger protein 639 [Source:HGNC Symbol;Acc:30950]                                                                     | 0.91 | 7.8E-05 |
| CD44    | ENSG00000026508 | CD44 molecule (Indian blood group) [Source:HGNC Symbol;Acc:1681]                                                           | 0.63 | 7.8E-05 |
| PARL    | ENSG00000175193 | presenilin associated, rhomboid-like [Source:HGNC<br>Symbol;Acc:18253]                                                     | 0.53 | 7.9E-05 |
| SLC26A2 | ENSG00000155850 | solute carrier family 26 (anion exchanger), member 2 [Source:HGNC<br>Symbol;Acc:10994]                                     | 1.13 | 7.9E-05 |
| ESF1    | ENSG00000089048 | ESF1, nucleolar pre-rRNA processing protein, homolog ( <i>S. cerevisiae</i> )<br>[Source:HGNC Symbol;Acc:15898]            | 1.10 | 7.9E-05 |
| HEXDC   | ENSG00000169660 | hexosaminidase (glycosyl hydrolase family 20, catalytic domain)<br>containing [Source:HGNC Symbol;Acc:26307]               | 0.88 | 8.0E-05 |
| ARL17B  | ENSG00000228696 | ADP-ribosylation factor-like 17B [Source:HGNC Symbol;Acc:32387]                                                            | 1.20 | 8.1E-05 |
| IKBIP   | ENSG00000166130 | IKBKB interacting protein [Source:HGNC Symbol;Acc:26430]                                                                   | 1.25 | 8.1E-05 |
| PRIM2   | ENSG00000146143 | primase, DNA, polypeptide 2 (58kDa) [Source:HGNC<br>Symbol;Acc:9370]                                                       | 0.95 | 8.2E-05 |
| CSTF1   | ENSG00000101138 | cleavage stimulation factor, 3' pre-RNA, subunit 1, 50kDa<br>[Source:HGNC Symbol;Acc:2483]                                 | 0.78 | 8.2E-05 |
| --      | ENSG00000263731 | --                                                                                                                         | 1.06 | 8.3E-05 |
| GEN1    | ENSG00000178295 | GEN1 Holliday junction 5' flap endonuclease [Source:HGNC<br>Symbol;Acc:26881]                                              | 0.83 | 8.3E-05 |
| ACO1    | ENSG00000122729 | aconitase 1, soluble [Source:HGNC Symbol;Acc:117]                                                                          | 0.69 | 8.4E-05 |

|          |                 |                                                                                                                                  |      |         |
|----------|-----------------|----------------------------------------------------------------------------------------------------------------------------------|------|---------|
| SF3B5    | ENSG00000169976 | splicing factor 3b, subunit 5, 10kDa [Source:HGNC Symbol;Acc:21083]                                                              | 0.84 | 8.5E-05 |
| FAM117A  | ENSG00000121104 | family with sequence similarity 117, member A [Source:HGNC Symbol;Acc:24179]                                                     | 1.24 | 8.6E-05 |
| FTSJ3    | ENSG00000108592 | FtsJ homolog 3 (E. coli) [Source:HGNC Symbol;Acc:17136]                                                                          | 0.58 | 8.6E-05 |
| --       | ENSG00000260966 | --                                                                                                                               | 1.58 | 8.7E-05 |
| LMAN1    | ENSG00000074695 | lectin, mannose-binding, 1 [Source:HGNC Symbol;Acc:6631]                                                                         | 0.76 | 8.7E-05 |
| MED28    | ENSG00000118579 | mediator complex subunit 28 [Source:HGNC Symbol;Acc:24628]                                                                       | 0.61 | 9.0E-05 |
| --       | ENSG00000251602 | --                                                                                                                               | 2.47 | 9.1E-05 |
| CEP76    | ENSG00000101624 | centrosomal protein 76kDa [Source:HGNC Symbol;Acc:25727]                                                                         | 0.95 | 9.1E-05 |
| ZNF629   | ENSG00000102870 | zinc finger protein 629 [Source:HGNC Symbol;Acc:29008]                                                                           | 0.63 | 9.1E-05 |
| ERAL1    | ENSG00000132591 | Era-like 12S mitochondrial rRNA chaperone 1 [Source:HGNC Symbol;Acc:3424]                                                        | 0.66 | 9.1E-05 |
| KIAA1143 | ENSG00000163807 | KIAA1143 [Source:HGNC Symbol;Acc:29198]                                                                                          | 0.79 | 9.2E-05 |
| KIF13A   | ENSG00000137177 | kinesin family member 13A [Source:HGNC Symbol;Acc:14566]                                                                         | 0.61 | 9.3E-05 |
| SMARCA5  | ENSG00000153147 | SWI/SNF related, matrix associated, actin dependent regulator of chromatin, subfamily a, member 5 [Source:HGNC Symbol;Acc:11101] | 0.79 | 9.3E-05 |
| PTRH2    | ENSG00000141378 | peptidyl-tRNA hydrolase 2 [Source:HGNC Symbol;Acc:24265]                                                                         | 0.70 | 9.3E-05 |
| POLR1D   | ENSG00000186184 | polymerase (RNA) I polypeptide D, 16kDa [Source:HGNC Symbol;Acc:20422]                                                           | 0.54 | 9.4E-05 |
| MRC2     | ENSG00000011028 | mannose receptor, C type 2 [Source:HGNC Symbol;Acc:16875]                                                                        | 1.84 | 9.5E-05 |
| --       | ENSG00000257303 | --                                                                                                                               | 0.81 | 9.5E-05 |
| ZNF691   | ENSG00000164011 | zinc finger protein 691 [Source:HGNC Symbol;Acc:28028]                                                                           | 1.18 | 9.5E-05 |
| HSPA4    | ENSG00000170606 | heat shock 70kDa protein 4 [Source:HGNC Symbol;Acc:5237]                                                                         | 0.62 | 9.5E-05 |
| LSM3     | ENSG00000170860 | LSM3 homolog, U6 small nuclear RNA associated (S. cerevisiae) [Source:HGNC Symbol;Acc:17874]                                     | 0.82 | 9.5E-05 |
| IFT27    | ENSG00000100360 | intraflagellar transport 27 homolog (Chlamydomonas) [Source:HGNC Symbol;Acc:18626]                                               | 1.02 | 9.5E-05 |
| PIFO     | ENSG00000173947 | primary cilia formation [Source:HGNC Symbol;Acc:27009]                                                                           | 1.78 | 9.6E-05 |

|            |                 |                                                                                                                                                |      |         |
|------------|-----------------|------------------------------------------------------------------------------------------------------------------------------------------------|------|---------|
| COCH       | ENSG00000100473 | cochlin [Source:HGNC Symbol;Acc:2180]<br>zinc finger, C2HC-type containing 1C [Source:HGNC<br>Symbol;Acc:20354]                                | 1.28 | 9.6E-05 |
| ZC2HC1C    | ENSG00000119703 | pyrophosphatase (inorganic) 2 [Source:HGNC Symbol;Acc:28883]<br>family with sequence similarity 98, member A [Source:HGNC<br>Symbol;Acc:24520] | 0.92 | 9.7E-05 |
| PPA2       | ENSG00000138777 | C1QTNF9B antisense RNA 1 [Source:HGNC Symbol;Acc:39839]<br>naked cuticle homolog 1 (Drosophila) [Source:HGNC<br>Symbol;Acc:17045]              | 0.70 | 9.7E-05 |
| FAM98A     | ENSG00000119812 | TAR (HIV-1) RNA binding protein 2 [Source:HGNC Symbol;Acc:11569]<br>SAYSVFN motif domain containing 1 [Source:HGNC<br>Symbol;Acc:21025]        | 0.63 | 9.7E-05 |
| C1QTNF9B-A | ENSG00000205861 |                                                                                                                                                | 1.75 | 9.7E-05 |
| NKD1       | ENSG00000140807 |                                                                                                                                                | 2.49 | 9.8E-05 |
| TARBP2     | ENSG00000139546 |                                                                                                                                                | 0.85 | 9.8E-05 |
| SAYSD1     | ENSG00000112167 |                                                                                                                                                | 0.63 | 9.9E-05 |

(B) Genes up-regulated after ETC-159 treatment

| Gene symbol | ENSEMBL gene ID | Gene description                                                                                                                          | log2 fold chang | BH-adjusted P-value |
|-------------|-----------------|-------------------------------------------------------------------------------------------------------------------------------------------|-----------------|---------------------|
| CEACAM1     | ENSG00000079385 | carcinoembryonic antigen-related cell adhesion molecule 1 (biliary<br>glycoprotein) [Source:HGNC Symbol;Acc:1814]                         | -3.23           | 1.4E-111            |
| KLK13       | ENSG00000167759 | kallikrein-related peptidase 13 [Source:HGNC Symbol;Acc:6361]                                                                             | -2.56           | 1.2E-94             |
| LIPE-AS1    | ENSG00000213904 | LIPE antisense RNA 1 [Source:HGNC Symbol;Acc:48589]                                                                                       | -3.06           | 1.7E-75             |
| TRIB2       | ENSG00000071575 | tribbles pseudokinase 2 [Source:HGNC Symbol;Acc:30809]<br>dehydrogenase/reductase (SDR family) member 9 [Source:HGNC<br>Symbol;Acc:16888] | -2.08           | 2.3E-75             |
| DHRS9       | ENSG00000073737 | mal, T-cell differentiation protein-like [Source:HGNC<br>Symbol;Acc:6818]                                                                 | -2.74           | 9.9E-74             |
| MALL        | ENSG00000144063 | tetraspanin 1 [Source:HGNC Symbol;Acc:20657]                                                                                              | -1.96           | 3.5E-73             |
| TSPAN1      | ENSG00000117472 | cytochrome P450, family 4, subfamily F, polypeptide 11 [Source:HGNC<br>Symbol;Acc:13265]                                                  | -2.15           | 7.6E-64             |
| CYP4F11     | ENSG00000171903 | protein tyrosine phosphatase, receptor type, H [Source:HGNC<br>Symbol;Acc:9672]                                                           | -2.12           | 1.8E-62             |
| PTPRH       | ENSG00000080031 |                                                                                                                                           | -2.68           | 6.2E-62             |

|         |                 |                                                                                                            |       |         |
|---------|-----------------|------------------------------------------------------------------------------------------------------------|-------|---------|
| ALOX5   | ENSG00000012779 | arachidonate 5-lipoxygenase [Source:HGNC Symbol;Acc:435]                                                   | -1.92 | 5.4E-61 |
| MUC12   | ENSG00000205277 | mucin 12, cell surface associated [Source:HGNC Symbol;Acc:7510]                                            | -2.59 | 1.7E-58 |
| DUOX2   | ENSG00000140279 | dual oxidase 2 [Source:HGNC Symbol;Acc:13273]                                                              | -2.69 | 3.5E-57 |
| TMPRSS2 | ENSG00000184012 | transmembrane protease, serine 2 [Source:HGNC Symbol;Acc:11876]                                            | -2.00 | 5.2E-57 |
| CGN     | ENSG00000143375 | cingulin [Source:HGNC Symbol;Acc:17429]                                                                    | -1.95 | 5.4E-57 |
| TRANK1  | ENSG00000168016 | tetratricopeptide repeat and ankyrin repeat containing 1 [Source:HGNC Symbol;Acc:29011]                    | -2.15 | 7.1E-57 |
| CDKN1A  | ENSG00000124762 | cyclin-dependent kinase inhibitor 1A (p21, Cip1) [Source:HGNC Symbol;Acc:1784]                             | -2.85 | 1.4E-54 |
| --      | ENSG00000260401 | --                                                                                                         | -2.65 | 4.7E-54 |
| C4BPB   | ENSG00000123843 | complement component 4 binding protein, beta [Source:HGNC Symbol;Acc:1328]                                 | -2.10 | 1.6E-51 |
| PLAUR   | ENSG00000011422 | plasminogen activator, urokinase receptor [Source:HGNC Symbol;Acc:9053]                                    | -2.40 | 3.1E-51 |
| SP6     | ENSG00000189120 | Sp6 transcription factor [Source:HGNC Symbol;Acc:14530]                                                    | -2.52 | 3.1E-50 |
| TMBIM1  | ENSG00000135926 | transmembrane BAX inhibitor motif containing 1 [Source:HGNC Symbol;Acc:23410]                              | -1.87 | 4.3E-49 |
| DUSP5   | ENSG00000138166 | dual specificity phosphatase 5 [Source:HGNC Symbol;Acc:3071]                                               | -2.95 | 3.3E-48 |
| PDE9A   | ENSG00000160191 | phosphodiesterase 9A [Source:HGNC Symbol;Acc:8795]                                                         | -2.62 | 3.6E-48 |
| PTAFR   | ENSG00000169403 | platelet-activating factor receptor [Source:HGNC Symbol;Acc:9582]                                          | -2.44 | 8.9E-48 |
| EMP1    | ENSG00000134531 | epithelial membrane protein 1 [Source:HGNC Symbol;Acc:3333]                                                | -2.67 | 1.4E-47 |
| TACSTD2 | ENSG00000184292 | tumor-associated calcium signal transducer 2 [Source:HGNC Symbol;Acc:11530]                                | -1.61 | 4.9E-47 |
| XDH     | ENSG00000158125 | xanthine dehydrogenase [Source:HGNC Symbol;Acc:12805]                                                      | -3.41 | 3.5E-46 |
| CDHR2   | ENSG00000074276 | cadherin-related family member 2 [Source:HGNC Symbol;Acc:18231]                                            | -2.55 | 1.1E-45 |
| CDKN2B  | ENSG00000147883 | cyclin-dependent kinase inhibitor 2B (p15, inhibits CDK4) [Source:HGNC Symbol;Acc:1788]                    | -2.56 | 1.9E-45 |
| CD55    | ENSG00000196352 | CD55 molecule, decay accelerating factor for complement (Cromer blood group) [Source:HGNC Symbol;Acc:2665] | -2.39 | 5.5E-45 |



|          |                 |                                                                                            |       |         |
|----------|-----------------|--------------------------------------------------------------------------------------------|-------|---------|
| IL2RG    | ENSG00000147168 | interleukin 2 receptor, gamma [Source:HGNC Symbol;Acc:6010]                                | -1.69 | 6.6E-45 |
| BTNL3    | ENSG00000168903 | butyrophilin-like 3 [Source:HGNC Symbol;Acc:1143]                                          | -2.76 | 1.0E-44 |
| GDPD2    | ENSG00000130055 | glycerophosphodiester phosphodiesterase domain containing 2 [Source:HGNC Symbol;Acc:25974] | -2.65 | 2.4E-44 |
| SDCBP2   | ENSG00000125775 | syndecan binding protein (syntenin) 2 [Source:HGNC Symbol;Acc:15756]                       | -2.15 | 2.6E-44 |
| BTNL8    | ENSG00000113303 | butyrophilin-like 8 [Source:HGNC Symbol;Acc:26131]                                         | -2.22 | 5.2E-44 |
| IL1A     | ENSG00000115008 | interleukin 1, alpha [Source:HGNC Symbol;Acc:5991]                                         | -2.64 | 1.5E-43 |
| COL17A1  | ENSG00000065618 | collagen, type XVII, alpha 1 [Source:HGNC Symbol;Acc:2194]                                 | -2.06 | 1.5E-43 |
| MUC13    | ENSG00000173702 | mucin 13, cell surface associated [Source:HGNC Symbol;Acc:7511]                            | -1.68 | 2.2E-43 |
| ST3GAL4  | ENSG00000110080 | ST3 beta-galactoside alpha-2,3-sialyltransferase 4 [Source:HGNC Symbol;Acc:10864]          | -2.10 | 8.0E-43 |
| CA4      | ENSG00000167434 | carbonic anhydrase IV [Source:HGNC Symbol;Acc:1375]                                        | -3.43 | 1.3E-42 |
| GLRX     | ENSG00000173221 | glutaredoxin (thioltransferase) [Source:HGNC Symbol;Acc:4330]                              | -1.99 | 1.5E-42 |
| CEACAM7  | ENSG00000007306 | carcinoembryonic antigen-related cell adhesion molecule 7 [Source:HGNC Symbol;Acc:1819]    | -2.95 | 1.6E-42 |
| LAMA4    | ENSG00000112769 | laminin, alpha 4 [Source:HGNC Symbol;Acc:6484]                                             | -2.95 | 1.9E-42 |
| RHCG     | ENSG00000140519 | Rh family, C glycoprotein [Source:HGNC Symbol;Acc:18140]                                   | -2.46 | 2.0E-42 |
| CD59     | ENSG00000085063 | CD59 molecule, complement regulatory protein [Source:HGNC Symbol;Acc:1689]                 | -1.93 | 2.9E-42 |
| FLNB     | ENSG00000136068 | filamin B, beta [Source:HGNC Symbol;Acc:3755]                                              | -1.61 | 4.7E-42 |
| TP53INP2 | ENSG00000078804 | tumor protein p53 inducible nuclear protein 2 [Source:HGNC Symbol;Acc:16104]               | -2.12 | 5.9E-42 |
| KLK7     | ENSG00000169035 | kallikrein-related peptidase 7 [Source:HGNC Symbol;Acc:6368]                               | -1.90 | 1.4E-41 |
| GCNT3    | ENSG00000140297 | glucosaminyl (N-acetyl) transferase 3, mucin type [Source:HGNC Symbol;Acc:4205]            | -2.25 | 3.9E-41 |
| SMAD3    | ENSG00000166949 | SMAD family member 3 [Source:HGNC Symbol;Acc:6769]                                         | -1.76 | 5.6E-41 |
| MXD1     | ENSG00000059728 | MAX dimerization protein 1 [Source:HGNC Symbol;Acc:6761]                                   | -2.42 | 8.3E-41 |
| LIPH     | ENSG00000163898 | lipase, member H [Source:HGNC Symbol;Acc:18483]                                            | -1.89 | 1.1E-40 |

|          |                 |                                                                                                                                |       |         |
|----------|-----------------|--------------------------------------------------------------------------------------------------------------------------------|-------|---------|
| KRT20    | ENSG00000171431 | keratin 20 [Source:HGNC Symbol;Acc:20412]<br>V-set and immunoglobulin domain containing 10 like [Source:HGNC Symbol;Acc:27111] | -2.13 | 1.8E-40 |
| VSIG10L  | ENSG00000186806 | transglutaminase 3 [Source:HGNC Symbol;Acc:11779]                                                                              | -2.40 | 1.9E-40 |
| TGM3     | ENSG00000125780 | apolipoprotein L, 2 [Source:HGNC Symbol;Acc:619]                                                                               | -1.87 | 2.8E-40 |
| APOL2    | ENSG00000128335 | tetratricopeptide repeat domain 9 [Source:HGNC Symbol;Acc:20267]                                                               | -1.99 | 6.7E-40 |
| TTC9     | ENSG00000133985 | protein phosphatase 1, regulatory (inhibitor) subunit 14D [Source:HGNC Symbol;Acc:14953]                                       | -1.63 | 7.2E-40 |
| PPP1R14D | ENSG00000166143 | apolipoprotein L, 1 [Source:HGNC Symbol;Acc:618]                                                                               | -1.96 | 7.3E-40 |
| APOL1    | ENSG00000100342 | small integral membrane protein 5 [Source:HGNC Symbol;Acc:40030]                                                               | -3.37 | 1.0E-39 |
| SMIM5    | ENSG00000204323 | interleukin 1, beta [Source:HGNC Symbol;Acc:5992]                                                                              | -2.50 | 1.3E-39 |
| IL1B     | ENSG00000125538 | transmembrane and coiled-coil domain family 3 [Source:HGNC Symbol;Acc:29199]                                                   | -2.31 | 1.3E-39 |
| TMCC3    | ENSG00000057704 | Z-DNA binding protein 1 [Source:HGNC Symbol;Acc:16176]                                                                         | -2.25 | 2.8E-39 |
| ZBP1     | ENSG00000124256 | kallikrein-related peptidase 10 [Source:HGNC Symbol;Acc:6358]                                                                  | -2.16 | 3.9E-39 |
| KLK10    | ENSG00000129451 | calpain 11 [Source:HGNC Symbol;Acc:1478]                                                                                       | -2.69 | 9.5E-39 |
| CAPN11   | ENSG00000137225 | fatty acid 2-hydroxylase [Source:HGNC Symbol;Acc:21197]                                                                        | -2.10 | 1.1E-38 |
| FA2H     | ENSG00000103089 | family with sequence similarity 83, member A [Source:HGNC Symbol;Acc:28210]                                                    | -2.22 | 3.4E-38 |
| FAM83A   | ENSG00000147689 | tumor protein p53 inducible protein 3 [Source:HGNC Symbol;Acc:19373]                                                           | -1.89 | 4.9E-38 |
| TP53I3   | ENSG00000115129 | peroxisome proliferator-activated receptor delta [Source:HGNC Symbol;Acc:9235]                                                 | -2.17 | 7.5E-38 |
| PPARD    | ENSG00000112033 | TIMP metalloproteinase inhibitor 2 [Source:HGNC Symbol;Acc:11821]                                                              | -1.61 | 8.6E-38 |
| TIMP2    | ENSG00000035862 | cytochrome P450, family 3, subfamily A, polypeptide 5 [Source:HGNC Symbol;Acc:2638]                                            | -2.09 | 9.7E-38 |
| CYP3A5   | ENSG00000106258 | diacylglycerol kinase, alpha 80kDa [Source:HGNC Symbol;Acc:2849]                                                               | -1.76 | 1.1E-37 |
| DGKA     | ENSG00000065357 | histone cluster 1, H1c [Source:HGNC Symbol;Acc:4716]                                                                           | -2.60 | 1.2E-37 |
| HIST1H1C | ENSG00000187837 | sorting nexin 9 [Source:HGNC Symbol;Acc:14973]                                                                                 | -1.77 | 1.8E-37 |
| SNX9     | ENSG00000130340 |                                                                                                                                |       |         |

|          |                 |                                                                                                                   |       |         |
|----------|-----------------|-------------------------------------------------------------------------------------------------------------------|-------|---------|
| PI3      | ENSG00000124102 | peptidase inhibitor 3, skin-derived [Source:HGNC Symbol;Acc:8947]                                                 | -2.14 | 2.3E-37 |
| PPL      | ENSG00000118898 | periplakin [Source:HGNC Symbol;Acc:9273]                                                                          | -1.75 | 2.9E-37 |
| PGLYRP3  | ENSG00000159527 | peptidoglycan recognition protein 3 [Source:HGNC Symbol;Acc:30014]                                                | -2.81 | 6.9E-37 |
| TMEM45B  | ENSG00000151715 | transmembrane protein 45B [Source:HGNC Symbol;Acc:25194]                                                          | -1.60 | 5.6E-36 |
| SLCO2A1  | ENSG00000174640 | solute carrier organic anion transporter family, member 2A1 [Source:HGNC Symbol;Acc:10955]                        | -2.36 | 7.2E-36 |
| TSPAN3   | ENSG00000140391 | tetraspanin 3 [Source:HGNC Symbol;Acc:17752]                                                                      | -1.41 | 7.9E-36 |
| --       | ENSG00000271218 | --                                                                                                                | -1.93 | 9.8E-36 |
| TTC22    | ENSG00000006555 | tetratricopeptide repeat domain 22 [Source:HGNC Symbol;Acc:26067]                                                 | -1.86 | 9.9E-36 |
| CASP4    | ENSG00000196954 | caspase 4, apoptosis-related cysteine peptidase [Source:HGNC Symbol;Acc:1505]                                     | -1.75 | 1.1E-35 |
| AKR1B10  | ENSG00000198074 | aldo-keto reductase family 1, member B10 (aldose reductase) [Source:HGNC Symbol;Acc:382]                          | -3.01 | 1.2E-35 |
| C4orf19  | ENSG00000154274 | chromosome 4 open reading frame 19 [Source:HGNC Symbol;Acc:25618]                                                 | -1.61 | 1.5E-35 |
| C1orf116 | ENSG00000182795 | chromosome 1 open reading frame 116 [Source:HGNC Symbol;Acc:28667]                                                | -1.60 | 3.7E-35 |
| VNN1     | ENSG00000112299 | vanin 1 [Source:HGNC Symbol;Acc:12705]                                                                            | -2.30 | 4.4E-35 |
| IL22RA1  | ENSG00000142677 | interleukin 22 receptor, alpha 1 [Source:HGNC Symbol;Acc:13700]                                                   | -1.74 | 9.1E-35 |
| HHLA2    | ENSG00000114455 | HERV-H LTR-associating 2 [Source:HGNC Symbol;Acc:4905]                                                            | -2.01 | 2.3E-34 |
| LAMA3    | ENSG00000053747 | laminin, alpha 3 [Source:HGNC Symbol;Acc:6483]                                                                    | -2.00 | 3.5E-34 |
| BAIAP2L1 | ENSG00000006453 | BAI1-associated protein 2-like 1 [Source:HGNC Symbol;Acc:21649]                                                   | -1.37 | 1.0E-33 |
| BHLHE41  | ENSG00000123095 | basic helix-loop-helix family, member e41 [Source:HGNC Symbol;Acc:16617]                                          | -2.05 | 1.2E-33 |
| NFKBIA   | ENSG00000100906 | nuclear factor of kappa light polypeptide gene enhancer in B-cells inhibitor, alpha [Source:HGNC Symbol;Acc:7797] | -1.62 | 1.9E-33 |
| STK24    | ENSG00000102572 | serine/threonine kinase 24 [Source:HGNC Symbol;Acc:11403]                                                         | -1.61 | 2.2E-33 |

|            |                 |                                                                                                                                             |       |         |
|------------|-----------------|---------------------------------------------------------------------------------------------------------------------------------------------|-------|---------|
| LRRC1      | ENSG00000137269 | leucine rich repeat containing 1 [Source:HGNC Symbol;Acc:14307]                                                                             | -1.71 | 2.7E-33 |
| ST6GALNAC6 | ENSG00000160408 | ST6 (alpha-N-acetyl-neuraminy-2,3-beta-galactosyl-1,3)-N-acetylgalactosaminide alpha-2,6-sialyltransferase 6 [Source:HGNC Symbol;Acc:23364] | -2.52 | 4.2E-33 |
| TGM2       | ENSG00000198959 | transglutaminase 2 [Source:HGNC Symbol;Acc:11778]                                                                                           | -2.41 | 4.4E-33 |
| TMC5       | ENSG00000103534 | transmembrane channel-like 5 [Source:HGNC Symbol;Acc:22999]                                                                                 | -1.52 | 1.4E-32 |
| KLK11      | ENSG00000167757 | kallikrein-related peptidase 11 [Source:HGNC Symbol;Acc:6359]                                                                               | -1.75 | 1.5E-32 |
| ADRB1      | ENSG00000043591 | adrenoceptor beta 1 [Source:HGNC Symbol;Acc:285]                                                                                            | -2.46 | 1.5E-32 |
| FAM214B    | ENSG00000005238 | family with sequence similarity 214, member B [Source:HGNC Symbol;Acc:25666]                                                                | -2.06 | 1.6E-32 |
| FADS6      | ENSG00000172782 | fatty acid desaturase 6 [Source:HGNC Symbol;Acc:30459]                                                                                      | -3.53 | 2.1E-32 |
| PARM1      | ENSG00000169116 | prostate androgen-regulated mucin-like protein 1 [Source:HGNC Symbol;Acc:24536]                                                             | -1.99 | 2.5E-32 |
| GPRC5A     | ENSG00000013588 | G protein-coupled receptor, family C, group 5, member A [Source:HGNC Symbol;Acc:9836]                                                       | -1.58 | 2.6E-32 |
| PRDM1      | ENSG00000057657 | PR domain containing 1, with ZNF domain [Source:HGNC Symbol;Acc:9346]                                                                       | -2.32 | 3.0E-32 |
| TGFA       | ENSG00000163235 | transforming growth factor, alpha [Source:HGNC Symbol;Acc:11765]                                                                            | -1.84 | 3.1E-32 |
| PPP4R1     | ENSG00000154845 | protein phosphatase 4, regulatory subunit 1 [Source:HGNC Symbol;Acc:9320]                                                                   | -1.44 | 3.3E-32 |
| SLC44A4    | ENSG00000204385 | solute carrier family 44, member 4 [Source:HGNC Symbol;Acc:13941]                                                                           | -1.56 | 3.5E-32 |
| C4BPA      | ENSG00000123838 | complement component 4 binding protein, alpha [Source:HGNC Symbol;Acc:1325]                                                                 | -2.37 | 3.6E-32 |
| NR1I2      | ENSG00000144852 | nuclear receptor subfamily 1, group I, member 2 [Source:HGNC Symbol;Acc:7968]                                                               | -1.43 | 3.8E-32 |
| STYK1      | ENSG00000060140 | serine/threonine/tyrosine kinase 1 [Source:HGNC Symbol;Acc:18889]                                                                           | -1.93 | 3.9E-32 |
| ST3GAL1    | ENSG00000008513 | ST3 beta-galactoside alpha-2,3-sialyltransferase 1 [Source:HGNC Symbol;Acc:10862]                                                           | -1.86 | 4.2E-32 |
| CDA        | ENSG00000158825 | cytidine deaminase [Source:HGNC Symbol;Acc:1712]                                                                                            | -2.21 | 4.8E-32 |

|           |                 |                                                                                                                   |       |         |
|-----------|-----------------|-------------------------------------------------------------------------------------------------------------------|-------|---------|
| SH3D21    | ENSG00000214193 | SH3 domain containing 21 [Source:HGNC Symbol;Acc:26236]                                                           | -2.19 | 5.3E-32 |
| SERPINA4  | ENSG00000100665 | serpin peptidase inhibitor, clade A (alpha-1 antiproteinase, antitrypsin), member 4 [Source:HGNC Symbol;Acc:8948] | -1.93 | 6.7E-32 |
| LAMC2     | ENSG00000058085 | laminin, gamma 2 [Source:HGNC Symbol;Acc:6493]                                                                    | -2.33 | 1.6E-31 |
| GPR110    | ENSG00000153292 | G protein-coupled receptor 110 [Source:HGNC Symbol;Acc:18990]                                                     | -2.40 | 2.5E-31 |
| TRIM31    | ENSG00000204616 | tripartite motif containing 31 [Source:HGNC Symbol;Acc:16289]                                                     | -1.60 | 2.6E-31 |
| B4GALNT3  | ENSG00000139044 | beta-1,4-N-acetyl-galactosaminyl transferase 3 [Source:HGNC Symbol;Acc:24137]                                     | -1.93 | 6.0E-31 |
| RHOF      | ENSG00000139725 | ras homolog family member F (in filopodia) [Source:HGNC Symbol;Acc:15703]                                         | -2.12 | 1.2E-30 |
| SLC37A1   | ENSG00000160190 | solute carrier family 37 (glucose-6-phosphate transporter), member 1 [Source:HGNC Symbol;Acc:11024]               | -1.38 | 1.7E-30 |
| FUT2      | ENSG00000176920 | fucosyltransferase 2 (secretor status included) [Source:HGNC Symbol;Acc:4013]                                     | -1.62 | 2.5E-30 |
| DENND3    | ENSG00000105339 | DENN/MADD domain containing 3 [Source:HGNC Symbol;Acc:29134]                                                      | -1.67 | 3.0E-30 |
| RELL1     | ENSG00000181826 | RELT-like 1 [Source:HGNC Symbol;Acc:27379]                                                                        | -1.71 | 3.2E-30 |
| CDCP1     | ENSG00000163814 | CUB domain containing protein 1 [Source:HGNC Symbol;Acc:24357]                                                    | -1.42 | 3.5E-30 |
| SGK2      | ENSG00000101049 | serum/glucocorticoid regulated kinase 2 [Source:HGNC Symbol;Acc:13900]                                            | -1.77 | 5.1E-30 |
| TM4SF1    | ENSG00000169908 | transmembrane 4 L six family member 1 [Source:HGNC Symbol;Acc:11853]                                              | -1.76 | 7.2E-30 |
| CIDEC     | ENSG00000187288 | cell death-inducing DFFA-like effector c [Source:HGNC Symbol;Acc:24229]                                           | -2.18 | 7.6E-30 |
| JOSD1     | ENSG00000100221 | Josephin domain containing 1 [Source:HGNC Symbol;Acc:28953]                                                       | -1.47 | 1.1E-29 |
| BIRC3     | ENSG00000023445 | baculoviral IAP repeat containing 3 [Source:HGNC Symbol;Acc:591]                                                  | -2.06 | 1.6E-29 |
| LINC00675 | ENSG00000263429 | long intergenic non-protein coding RNA 675 [Source:HGNC Symbol;Acc:44356]                                         | -1.60 | 1.9E-29 |
| HBEGF     | ENSG00000113070 | heparin-binding EGF-like growth factor [Source:HGNC Symbol;Acc:3059]                                              | -2.21 | 2.6E-29 |

|          |                 |                                                                                                      |       |         |
|----------|-----------------|------------------------------------------------------------------------------------------------------|-------|---------|
| SRD5A3   | ENSG00000128039 | steroid 5 alpha-reductase 3 [Source:HGNC Symbol;Acc:25812]                                           | -1.73 | 2.7E-29 |
| MGLL     | ENSG00000074416 | monoglyceride lipase [Source:HGNC Symbol;Acc:17038]                                                  | -1.80 | 3.0E-29 |
| MIR22HG  | ENSG00000186594 | MIR22 host gene (non-protein coding) [Source:HGNC Symbol;Acc:28219]                                  | -2.02 | 3.1E-29 |
| KRT80    | ENSG00000167767 | keratin 80 [Source:HGNC Symbol;Acc:27056]                                                            | -1.63 | 3.7E-29 |
| FAXDC2   | ENSG00000170271 | fatty acid hydroxylase domain containing 2 [Source:HGNC Symbol;Acc:1334]                             | -2.62 | 4.8E-29 |
| --       | ENSG00000260592 | --                                                                                                   | -1.69 | 4.8E-29 |
| MYD88    | ENSG00000172936 | myeloid differentiation primary response 88 [Source:HGNC Symbol;Acc:7562]                            | -1.23 | 5.6E-29 |
| PTK2B    | ENSG00000120899 | protein tyrosine kinase 2 beta [Source:HGNC Symbol;Acc:9612]                                         | -1.55 | 6.1E-29 |
| P2RX4    | ENSG00000135124 | purinergic receptor P2X, ligand-gated ion channel, 4 [Source:HGNC Symbol;Acc:8535]                   | -1.47 | 7.0E-29 |
| AOC1     | ENSG00000002726 | amine oxidase, copper containing 1 [Source:HGNC Symbol;Acc:80]                                       | -1.91 | 8.8E-29 |
| PLAC8    | ENSG00000145287 | placenta-specific 8 [Source:HGNC Symbol;Acc:19254]                                                   | -2.76 | 9.1E-29 |
| ID1      | ENSG00000125968 | inhibitor of DNA binding 1, dominant negative helix-loop-helix protein [Source:HGNC Symbol;Acc:5360] | -2.72 | 1.0E-28 |
| DUOXA2   | ENSG00000140274 | dual oxidase maturation factor 2 [Source:HGNC Symbol;Acc:32698]                                      | -2.51 | 1.1E-28 |
| TMEM92   | ENSG00000167105 | transmembrane protein 92 [Source:HGNC Symbol;Acc:26579]                                              | -1.69 | 1.4E-28 |
| TRERF1   | ENSG00000124496 | transcriptional regulating factor 1 [Source:HGNC Symbol;Acc:18273]                                   | -2.31 | 1.5E-28 |
| IFNGR2   | ENSG00000159128 | interferon gamma receptor 2 (interferon gamma transducer 1) [Source:HGNC Symbol;Acc:5440]            | -1.37 | 1.9E-28 |
| --       | ENSG00000267484 | --                                                                                                   | -1.39 | 2.1E-28 |
| P2RY2    | ENSG00000175591 | purinergic receptor P2Y, G-protein coupled, 2 [Source:HGNC Symbol;Acc:8541]                          | -2.08 | 2.3E-28 |
| PDZK1IP1 | ENSG00000162366 | PDZK1 interacting protein 1 [Source:HGNC Symbol;Acc:16887]                                           | -1.84 | 3.2E-28 |
| ZNF185   | ENSG00000147394 | zinc finger protein 185 (LIM domain) [Source:HGNC Symbol;Acc:12976]                                  | -1.61 | 3.6E-28 |

|          |                 |                                                                                                       |       |         |
|----------|-----------------|-------------------------------------------------------------------------------------------------------|-------|---------|
| VDAC2    | ENSG00000165637 | voltage-dependent anion channel 2 [Source:HGNC Symbol;Acc:12672]                                      | -1.40 | 3.7E-28 |
| HK2      | ENSG00000159399 | hexokinase 2 [Source:HGNC Symbol;Acc:4923]                                                            | -2.06 | 3.8E-28 |
| SP140L   | ENSG00000185404 | SP140 nuclear body protein-like [Source:HGNC Symbol;Acc:25105]                                        | -1.33 | 4.4E-28 |
| IL36RN   | ENSG00000136695 | interleukin 36 receptor antagonist [Source:HGNC Symbol;Acc:15561]                                     | -2.49 | 4.7E-28 |
| MYO1E    | ENSG00000157483 | myosin IE [Source:HGNC Symbol;Acc:7599]                                                               | -1.56 | 5.2E-28 |
| HKDC1    | ENSG00000156510 | hexokinase domain containing 1 [Source:HGNC Symbol;Acc:23302]                                         | -1.37 | 6.1E-28 |
| C11orf86 | ENSG00000173237 | chromosome 11 open reading frame 86 [Source:HGNC Symbol;Acc:34442]                                    | -3.10 | 7.6E-28 |
| CDHR5    | ENSG00000099834 | cadherin-related family member 5 [Source:HGNC Symbol;Acc:7521]                                        | -2.17 | 8.8E-28 |
| PTTG1IP  | ENSG00000183255 | pituitary tumor-transforming 1 interacting protein [Source:HGNC Symbol;Acc:13524]                     | -1.29 | 9.0E-28 |
| NDST1    | ENSG00000070614 | N-deacetylase/N-sulfotransferase (heparan glucosaminyl) 1 [Source:HGNC Symbol;Acc:7680]               | -1.48 | 1.0E-27 |
| ANXA11   | ENSG00000122359 | annexin A11 [Source:HGNC Symbol;Acc:535]                                                              | -1.39 | 1.0E-27 |
| ISG20    | ENSG00000172183 | interferon stimulated exonuclease gene 20kDa [Source:HGNC Symbol;Acc:6130]                            | -2.09 | 1.3E-27 |
| ATF3     | ENSG00000162772 | activating transcription factor 3 [Source:HGNC Symbol;Acc:785]                                        | -1.81 | 2.4E-27 |
| RIPK3    | ENSG00000129465 | receptor-interacting serine-threonine kinase 3 [Source:HGNC Symbol;Acc:10021]                         | -1.50 | 2.4E-27 |
| --       | ENSG00000264235 | --                                                                                                    | -1.21 | 2.6E-27 |
| SLC51A   | ENSG00000163959 | solute carrier family 51, alpha subunit [Source:HGNC Symbol;Acc:29955]                                | -1.98 | 2.7E-27 |
| CCL20    | ENSG00000115009 | chemokine (C-C motif) ligand 20 [Source:HGNC Symbol;Acc:10619]                                        | -2.37 | 2.7E-27 |
| MYO15B   | ENSG00000266714 | myosin XVB pseudogene [Source:HGNC Symbol;Acc:14083]                                                  | -2.29 | 3.0E-27 |
| LRP10    | ENSG00000197324 | low density lipoprotein receptor-related protein 10 [Source:HGNC Symbol;Acc:14553]                    | -1.56 | 3.1E-27 |
| MARCH3   | ENSG00000173926 | membrane-associated ring finger (C3HC4) 3, E3 ubiquitin protein ligase [Source:HGNC Symbol;Acc:28728] | -1.37 | 3.3E-27 |

|          |                 |                                                                                                |       |         |
|----------|-----------------|------------------------------------------------------------------------------------------------|-------|---------|
| TUFT1    | ENSG00000143367 | tuftelin 1 [Source:HGNC Symbol;Acc:12422]                                                      | -1.51 | 3.5E-27 |
| SAA2     | ENSG00000134339 | serum amyloid A2 [Source:HGNC Symbol;Acc:10514]                                                | -2.00 | 6.2E-27 |
| FAM228B  | ENSG00000219626 | family with sequence similarity 228, member B [Source:HGNC Symbol;Acc:24736]                   | -1.67 | 7.2E-27 |
| PARP12   | ENSG00000059378 | poly (ADP-ribose) polymerase family, member 12 [Source:HGNC Symbol;Acc:21919]                  | -1.11 | 7.4E-27 |
| TNIP1    | ENSG00000145901 | TNFAIP3 interacting protein 1 [Source:HGNC Symbol;Acc:16903]                                   | -1.61 | 7.5E-27 |
| LANCL3   | ENSG00000147036 | LanC lantibiotic synthetase component C-like 3 (bacterial) [Source:HGNC Symbol;Acc:24767]      | -2.00 | 8.0E-27 |
| MYO7B    | ENSG00000169994 | myosin VII B [Source:HGNC Symbol;Acc:7607]                                                     | -2.09 | 9.4E-27 |
| TMEM120B | ENSG00000188735 | transmembrane protein 120B [Source:HGNC Symbol;Acc:32008]                                      | -2.06 | 2.1E-26 |
| RND1     | ENSG00000172602 | Rho family GTPase 1 [Source:HGNC Symbol;Acc:18314]                                             | -2.52 | 2.1E-26 |
| CPNE5    | ENSG00000124772 | copine V [Source:HGNC Symbol;Acc:2318]                                                         | -2.68 | 2.2E-26 |
| ACE2     | ENSG00000130234 | angiotensin I converting enzyme 2 [Source:HGNC Symbol;Acc:13557]                               | -2.12 | 2.5E-26 |
| CTSE     | ENSG00000196188 | cathepsin E [Source:HGNC Symbol;Acc:2530]                                                      | -1.68 | 2.7E-26 |
| SMPD1    | ENSG00000166311 | sphingomyelin phosphodiesterase 1, acid lysosomal [Source:HGNC Symbol;Acc:11120]               | -1.98 | 2.9E-26 |
| B4GALT1  | ENSG00000086062 | UDP-Gal:betaGlcNAc beta 1,4- galactosyltransferase, polypeptide 1 [Source:HGNC Symbol;Acc:924] | -1.63 | 2.9E-26 |
| NOS2     | ENSG00000007171 | nitric oxide synthase 2, inducible [Source:HGNC Symbol;Acc:7873]                               | -2.98 | 5.7E-26 |
| PHGR1    | ENSG00000233041 | proline/histidine/glycine-rich 1 [Source:HGNC Symbol;Acc:37226]                                | -3.08 | 5.7E-26 |
| VILL     | ENSG00000136059 | villin-like [Source:HGNC Symbol;Acc:30906]                                                     | -1.80 | 6.2E-26 |
| FBXO32   | ENSG00000156804 | F-box protein 32 [Source:HGNC Symbol;Acc:16731]                                                | -1.63 | 7.2E-26 |
| C15orf52 | ENSG00000188549 | chromosome 15 open reading frame 52 [Source:HGNC Symbol;Acc:33488]                             | -1.47 | 1.1E-25 |
| MAFF     | ENSG00000185022 | v-maf avian musculoaponeurotic fibrosarcoma oncogene homolog F [Source:HGNC Symbol;Acc:6780]   | -1.98 | 1.1E-25 |
| CLIC5    | ENSG00000112782 | chloride intracellular channel 5 [Source:HGNC Symbol;Acc:13517]                                | -2.34 | 1.3E-25 |
| KIF13B   | ENSG00000197892 | kinesin family member 13B [Source:HGNC Symbol;Acc:14405]                                       | -1.49 | 1.6E-25 |



|           |                 |                                                                                                                        |       |         |
|-----------|-----------------|------------------------------------------------------------------------------------------------------------------------|-------|---------|
| ABCG1     | ENSG00000160179 | ATP-binding cassette, sub-family G (WHITE), member 1 [Source:HGNC Symbol;Acc:73]                                       | -1.92 | 1.6E-25 |
| PRKCD     | ENSG00000163932 | protein kinase C, delta [Source:HGNC Symbol;Acc:9399]                                                                  | -1.30 | 1.8E-25 |
| HIST1H2BC | ENSG00000180596 | histone cluster 1, H2bc [Source:HGNC Symbol;Acc:4757]                                                                  | -2.16 | 1.8E-25 |
| PVRL4     | ENSG00000143217 | poliovirus receptor-related 4 [Source:HGNC Symbol;Acc:19688]                                                           | -1.55 | 2.1E-25 |
|           |                 | adaptor protein, phosphotyrosine interaction, PH domain and leucine zipper containing 2 [Source:HGNC Symbol;Acc:18242] | -1.83 | 2.4E-25 |
| APPL2     | ENSG00000136044 |                                                                                                                        |       |         |
| CORO2A    | ENSG00000106789 | coronin, actin binding protein, 2A [Source:HGNC Symbol;Acc:2255]                                                       | -1.43 | 2.9E-25 |
| --        | ENSG00000268739 | --                                                                                                                     | -2.24 | 3.9E-25 |
|           |                 | regulator of G-protein signaling 2, 24kDa [Source:HGNC Symbol;Acc:9998]                                                | -2.53 | 4.7E-25 |
| RGS2      | ENSG00000116741 |                                                                                                                        |       |         |
|           |                 | psoriasis susceptibility 1 candidate 2 [Source:HGNC Symbol;Acc:17199]                                                  | -2.15 | 4.8E-25 |
| PSORS1C2  | ENSG00000204538 |                                                                                                                        |       |         |
| --        | ENSG00000254680 | --                                                                                                                     | -1.40 | 5.8E-25 |
| SDC4      | ENSG00000124145 | syndecan 4 [Source:HGNC Symbol;Acc:10661]                                                                              | -1.52 | 6.0E-25 |
| F11R      | ENSG00000158769 | F11 receptor [Source:HGNC Symbol;Acc:14685]                                                                            | -1.12 | 8.5E-25 |
|           |                 | tumor necrosis factor receptor superfamily, member 1A [Source:HGNC Symbol;Acc:11916]                                   | -1.41 | 8.5E-25 |
| TNFRSF1A  | ENSG00000067182 |                                                                                                                        |       |         |
| PLXNA2    | ENSG00000076356 | plexin A2 [Source:HGNC Symbol;Acc:9100]                                                                                | -1.30 | 9.4E-25 |
| CLDN7     | ENSG00000181885 | claudin 7 [Source:HGNC Symbol;Acc:2049]                                                                                | -1.34 | 9.9E-25 |
| FLNB-AS1  | ENSG00000244161 | FLNB antisense RNA 1 [Source:HGNC Symbol;Acc:40239]                                                                    | -1.93 | 1.0E-24 |
|           |                 | lectin, galactoside-binding, soluble, 9B [Source:HGNC Symbol;Acc:24842]                                                | -2.76 | 1.0E-24 |
| LGALS9B   | ENSG00000170298 |                                                                                                                        |       |         |
| DUSP1     | ENSG00000120129 | dual specificity phosphatase 1 [Source:HGNC Symbol;Acc:3064]                                                           | -2.04 | 1.0E-24 |
| LAMB3     | ENSG00000196878 | laminin, beta 3 [Source:HGNC Symbol;Acc:6490]                                                                          | -1.89 | 1.2E-24 |
| ACKR2     | ENSG00000144648 | atypical chemokine receptor 2 [Source:HGNC Symbol;Acc:1565]                                                            | -2.69 | 1.2E-24 |
|           |                 | vesicle-associated membrane protein 8 [Source:HGNC Symbol;Acc:12647]                                                   | -1.40 | 1.3E-24 |
| VAMP8     | ENSG00000118640 |                                                                                                                        |       |         |
| LASP1     | ENSG00000002834 | LIM and SH3 protein 1 [Source:HGNC Symbol;Acc:6513]                                                                    | -1.14 | 1.6E-24 |

|           |                 |                                                                                                               |       |         |
|-----------|-----------------|---------------------------------------------------------------------------------------------------------------|-------|---------|
| SLC20A2   | ENSG00000168575 | solute carrier family 20 (phosphate transporter), member 2 [Source:HGNC Symbol;Acc:10947]                     | -1.37 | 1.8E-24 |
| MEF2D     | ENSG00000116604 | myocyte enhancer factor 2D [Source:HGNC Symbol;Acc:6997]                                                      | -1.74 | 1.9E-24 |
| LMO7      | ENSG00000136153 | LIM domain 7 [Source:HGNC Symbol;Acc:6646]                                                                    | -1.84 | 2.1E-24 |
| MICAL2    | ENSG00000133816 | microtubule associated monooxygenase, calponin and LIM domain containing 2 [Source:HGNC Symbol;Acc:24693]     | -1.38 | 2.6E-24 |
| UNC5B     | ENSG00000107731 | unc-5 homolog B (C. elegans) [Source:HGNC Symbol;Acc:12568]                                                   | -1.80 | 2.7E-24 |
| GDPD3     | ENSG00000102886 | glycerophosphodiester phosphodiesterase domain containing 3 [Source:HGNC Symbol;Acc:28638]                    | -1.70 | 3.3E-24 |
| MUC4      | ENSG00000145113 | mucin 4, cell surface associated [Source:HGNC Symbol;Acc:7514]                                                | -1.98 | 4.0E-24 |
| SMURF1    | ENSG00000198742 | SMAD specific E3 ubiquitin protein ligase 1 [Source:HGNC Symbol;Acc:16807]                                    | -1.28 | 4.3E-24 |
| LDLR      | ENSG00000130164 | low density lipoprotein receptor [Source:HGNC Symbol;Acc:6547]                                                | -1.43 | 4.8E-24 |
| MPZL3     | ENSG00000160588 | myelin protein zero-like 3 [Source:HGNC Symbol;Acc:27279]                                                     | -1.48 | 5.0E-24 |
| LGALS3    | ENSG00000131981 | lectin, galactoside-binding, soluble, 3 [Source:HGNC Symbol;Acc:6563]                                         | -1.37 | 9.0E-24 |
| MOGAT3    | ENSG00000106384 | monoacylglycerol O-acyltransferase 3 [Source:HGNC Symbol;Acc:23249]                                           | -1.87 | 9.1E-24 |
| B3GALT4   | ENSG00000235863 | UDP-Gal:betaGlcNAc beta 1,3-galactosyltransferase, polypeptide 4 [Source:HGNC Symbol;Acc:919]                 | -1.89 | 9.5E-24 |
| HIST1H2BD | ENSG00000158373 | histone cluster 1, H2bd [Source:HGNC Symbol;Acc:4747]                                                         | -1.66 | 1.1E-23 |
| IL1RN     | ENSG00000136689 | interleukin 1 receptor antagonist [Source:HGNC Symbol;Acc:6000]                                               | -1.66 | 1.3E-23 |
| FUT3      | ENSG00000171124 | fucosyltransferase 3 (galactoside 3(4)-L-fucosyltransferase, Lewis blood group) [Source:HGNC Symbol;Acc:4014] | -1.60 | 1.4E-23 |
| CASP10    | ENSG00000003400 | caspase 10, apoptosis-related cysteine peptidase [Source:HGNC Symbol;Acc:1500]                                | -1.44 | 1.6E-23 |
| NECAP2    | ENSG00000157191 | NECAP endocytosis associated 2 [Source:HGNC Symbol;Acc:25528]                                                 | -1.17 | 2.2E-23 |
| B3GNT3    | ENSG00000179913 | UDP-GlcNAc:betaGal beta-1,3-N-acetylglucosaminyltransferase 3 [Source:HGNC Symbol;Acc:13528]                  | -1.48 | 2.4E-23 |

|          |                 |                                                                                    |       |         |
|----------|-----------------|------------------------------------------------------------------------------------|-------|---------|
| CFLAR    | ENSG00000003402 | CASP8 and FADD-like apoptosis regulator [Source:HGNC Symbol;Acc:1876]              | -1.47 | 2.6E-23 |
| STOM     | ENSG00000148175 | stomatin [Source:HGNC Symbol;Acc:3383]                                             | -1.71 | 2.7E-23 |
| FHL2     | ENSG00000115641 | four and a half LIM domains 2 [Source:HGNC Symbol;Acc:3703]                        | -1.12 | 3.1E-23 |
| PSORS1C1 | ENSG00000204540 | psoriasis susceptibility 1 candidate 1 [Source:HGNC Symbol;Acc:17202]              | -2.11 | 3.2E-23 |
| CDSN     | ENSG00000204539 | corneodesmosin [Source:HGNC Symbol;Acc:1802]                                       | -2.04 | 3.4E-23 |
| EDN3     | ENSG00000124205 | endothelin 3 [Source:HGNC Symbol;Acc:3178]                                         | -2.34 | 3.4E-23 |
| AGPAT9   | ENSG00000138678 | 1-acylglycerol-3-phosphate O-acyltransferase 9 [Source:HGNC Symbol;Acc:28157]      | -1.94 | 3.9E-23 |
| --       | ENSG00000116883 | --                                                                                 | -2.31 | 4.3E-23 |
| ARHGEF18 | ENSG00000104880 | Rho/Rac guanine nucleotide exchange factor (GEF) 18 [Source:HGNC Symbol;Acc:17090] | -1.80 | 4.7E-23 |
| PRSS12   | ENSG00000164099 | protease, serine, 12 (neurotrypsin, motopsin) [Source:HGNC Symbol;Acc:9477]        | -1.58 | 4.7E-23 |
| CLCA4    | ENSG00000016602 | chloride channel accessory 4 [Source:HGNC Symbol;Acc:2018]                         | -2.80 | 4.9E-23 |
| --       | ENSG00000258757 | --                                                                                 | -1.84 | 5.4E-23 |
| MISP     | ENSG00000099812 | mitotic spindle positioning [Source:HGNC Symbol;Acc:27000]                         | -1.70 | 5.5E-23 |
| --       | ENSG00000171658 | --                                                                                 | -2.44 | 5.5E-23 |
| PRR15L   | ENSG00000167183 | proline rich 15-like [Source:HGNC Symbol;Acc:28149]                                | -1.27 | 6.0E-23 |
| CCDC129  | ENSG00000180347 | coiled-coil domain containing 129 [Source:HGNC Symbol;Acc:27363]                   | -2.80 | 6.1E-23 |
| CCDC68   | ENSG00000166510 | coiled-coil domain containing 68 [Source:HGNC Symbol;Acc:24350]                    | -2.00 | 6.4E-23 |
| RNF186   | ENSG00000178828 | ring finger protein 186 [Source:HGNC Symbol;Acc:25978]                             | -1.65 | 6.6E-23 |
| RPE65    | ENSG00000116745 | retinal pigment epithelium-specific protein 65kDa [Source:HGNC Symbol;Acc:10294]   | -2.09 | 6.6E-23 |
| FOSL2    | ENSG00000075426 | FOS-like antigen 2 [Source:HGNC Symbol;Acc:3798]                                   | -1.34 | 7.5E-23 |
| GK-AS1   | ENSG00000243055 | GK antisense RNA 1 [Source:HGNC Symbol;Acc:40255]                                  | -2.30 | 8.4E-23 |
| MUC1     | ENSG00000185499 | mucin 1, cell surface associated [Source:HGNC Symbol;Acc:7508]                     | -1.51 | 9.1E-23 |
| IL17C    | ENSG00000124391 | interleukin 17C [Source:HGNC Symbol;Acc:5983]                                      | -3.28 | 9.2E-23 |

|          |                 |                                                                                                              |       |         |
|----------|-----------------|--------------------------------------------------------------------------------------------------------------|-------|---------|
| FAM3D    | ENSG00000198643 | family with sequence similarity 3, member D [Source:HGNC Symbol;Acc:18665]                                   | -1.45 | 9.6E-23 |
| PXN-AS1  | ENSG00000255857 | PXN antisense RNA 1 [Source:HGNC Symbol;Acc:44123]                                                           | -1.19 | 9.9E-23 |
| SNRK     | ENSG00000163788 | SNF related kinase [Source:HGNC Symbol;Acc:30598]                                                            | -1.54 | 1.2E-22 |
| SAMD9L   | ENSG00000177409 | sterile alpha motif domain containing 9-like [Source:HGNC Symbol;Acc:1349]                                   | -2.19 | 1.3E-22 |
| ACTB     | ENSG00000075624 | actin, beta [Source:HGNC Symbol;Acc:132]                                                                     | -1.30 | 1.7E-22 |
| CAPN5    | ENSG00000149260 | calpain 5 [Source:HGNC Symbol;Acc:1482]                                                                      | -1.33 | 1.7E-22 |
| C2CD2L   | ENSG00000172375 | C2CD2-like [Source:HGNC Symbol;Acc:29000]                                                                    | -1.52 | 1.8E-22 |
| RND3     | ENSG00000115963 | Rho family GTPase 3 [Source:HGNC Symbol;Acc:671]                                                             | -1.64 | 2.3E-22 |
| LGALS9C  | ENSG00000171916 | lectin, galactoside-binding, soluble, 9C [Source:HGNC Symbol;Acc:33874]                                      | -2.34 | 2.7E-22 |
| TRIO     | ENSG00000038382 | trio Rho guanine nucleotide exchange factor [Source:HGNC Symbol;Acc:12303]                                   | -1.03 | 2.8E-22 |
| MAP1LC3B | ENSG00000140941 | microtubule-associated protein 1 light chain 3 beta [Source:HGNC Symbol;Acc:13352]                           | -1.16 | 2.8E-22 |
| STS      | ENSG00000101846 | steroid sulfatase (microsomal), isozyme S [Source:HGNC Symbol;Acc:11425]                                     | -1.69 | 3.2E-22 |
| IRF1     | ENSG00000125347 | interferon regulatory factor 1 [Source:HGNC Symbol;Acc:6116]                                                 | -1.57 | 3.3E-22 |
| CXCL1    | ENSG00000163739 | chemokine (C-X-C motif) ligand 1 (melanoma growth stimulating activity, alpha) [Source:HGNC Symbol;Acc:4602] | -1.74 | 3.4E-22 |
| UCA1     | ENSG00000214049 | urothelial cancer associated 1 (non-protein coding) [Source:HGNC Symbol;Acc:37126]                           | -1.37 | 3.6E-22 |
| TMEM127  | ENSG00000135956 | transmembrane protein 127 [Source:HGNC Symbol;Acc:26038]                                                     | -1.26 | 4.0E-22 |
| GOLGA7B  | ENSG00000155265 | golgin A7 family, member B [Source:HGNC Symbol;Acc:31668]                                                    | -1.77 | 4.4E-22 |
| --       | ENSG00000272851 | --                                                                                                           | -1.65 | 4.8E-22 |
| C6orf222 | ENSG00000189325 | chromosome 6 open reading frame 222 [Source:HGNC Symbol;Acc:33769]                                           | -1.58 | 4.9E-22 |
| --       | ENSG00000270069 | --                                                                                                           | -1.98 | 5.2E-22 |

|          |                 |                                                                                                                  |       |         |
|----------|-----------------|------------------------------------------------------------------------------------------------------------------|-------|---------|
| TNFAIP2  | ENSG00000185215 | tumor necrosis factor, alpha-induced protein 2 [Source:HGNC Symbol;Acc:11895]                                    | -1.91 | 5.3E-22 |
| TRIM25   | ENSG00000121060 | tripartite motif containing 25 [Source:HGNC Symbol;Acc:12932]                                                    | -1.16 | 6.7E-22 |
| LPAR5    | ENSG00000184574 | lysophosphatidic acid receptor 5 [Source:HGNC Symbol;Acc:13307]                                                  | -1.18 | 9.0E-22 |
| ITM2C    | ENSG00000135916 | integral membrane protein 2C [Source:HGNC Symbol;Acc:6175]                                                       | -1.45 | 9.2E-22 |
| ETS1     | ENSG00000134954 | v-ets avian erythroblastosis virus E26 oncogene homolog 1 [Source:HGNC Symbol;Acc:3488]                          | -2.08 | 9.7E-22 |
| ZFAND2A  | ENSG00000178381 | zinc finger, AN1-type domain 2A [Source:HGNC Symbol;Acc:28073]                                                   | -1.51 | 1.1E-21 |
| MYRFL    | ENSG00000166268 | myelin regulatory factor-like [Source:HGNC Symbol;Acc:26316]                                                     | -1.69 | 1.3E-21 |
| ABHD4    | ENSG00000100439 | abhydrolase domain containing 4 [Source:HGNC Symbol;Acc:20154]                                                   | -1.44 | 1.3E-21 |
| TMC4     | ENSG00000167608 | transmembrane channel-like 4 [Source:HGNC Symbol;Acc:22998]                                                      | -1.39 | 1.5E-21 |
| SLC9A8   | ENSG00000197818 | solute carrier family 9, subfamily A (NHE8, cation proton antiporter 8), member 8 [Source:HGNC Symbol;Acc:20728] | -1.30 | 1.5E-21 |
| MAPK3    | ENSG00000102882 | mitogen-activated protein kinase 3 [Source:HGNC Symbol;Acc:6877]                                                 | -1.42 | 1.5E-21 |
| KIAA0247 | ENSG00000100647 | KIAA0247 [Source:HGNC Symbol;Acc:19956]                                                                          | -1.34 | 1.5E-21 |
| CLDN4    | ENSG00000189143 | claudin 4 [Source:HGNC Symbol;Acc:2046]                                                                          | -1.83 | 1.6E-21 |
| EZR      | ENSG00000092820 | ezrin [Source:HGNC Symbol;Acc:12691]                                                                             | -1.32 | 1.6E-21 |
| BEAN1    | ENSG00000166546 | brain expressed, associated with NEDD4, 1 [Source:HGNC Symbol;Acc:24160]                                         | -2.59 | 2.0E-21 |
| NT5C2    | ENSG00000076685 | 5'-nucleotidase, cytosolic II [Source:HGNC Symbol;Acc:8022]                                                      | -1.25 | 2.0E-21 |
| TM4SF20  | ENSG00000168955 | transmembrane 4 L six family member 20 [Source:HGNC Symbol;Acc:26230]                                            | -2.34 | 2.1E-21 |
| CTNND1   | ENSG00000198561 | catenin (cadherin-associated protein), delta 1 [Source:HGNC Symbol;Acc:2515]                                     | -1.42 | 2.1E-21 |
| LHFPL2   | ENSG00000145685 | lipoma HMGIC fusion partner-like 2 [Source:HGNC Symbol;Acc:6588]                                                 | -1.39 | 2.5E-21 |
| POLD4    | ENSG00000175482 | polymerase (DNA-directed), delta 4, accessory subunit [Source:HGNC Symbol;Acc:14106]                             | -1.56 | 2.6E-21 |
| LGALS1   | ENSG00000119862 | lectin, galactoside-binding-like [Source:HGNC Symbol;Acc:25012]                                                  | -1.69 | 2.7E-21 |

|          |                 |                                                                                                                  |       |         |
|----------|-----------------|------------------------------------------------------------------------------------------------------------------|-------|---------|
| ABLIM3   | ENSG00000173210 | actin binding LIM protein family, member 3 [Source:HGNC Symbol;Acc:29132]                                        | -1.45 | 2.8E-21 |
| ERO1L    | ENSG00000197930 | ERO1-like ( <i>S. cerevisiae</i> ) [Source:HGNC Symbol;Acc:13280]                                                | -1.94 | 2.9E-21 |
| TINAGL1  | ENSG00000142910 | tubulointerstitial nephritis antigen-like 1 [Source:HGNC Symbol;Acc:19168]                                       | -1.72 | 3.0E-21 |
| TNFAIP1  | ENSG00000109079 | tumor necrosis factor, alpha-induced protein 1 (endothelial) [Source:HGNC Symbol;Acc:11894]                      | -1.18 | 3.3E-21 |
| MAPRE3   | ENSG00000084764 | microtubule-associated protein, RP/EB family, member 3 [Source:HGNC Symbol;Acc:6892]                             | -1.34 | 3.5E-21 |
| TXNRD1   | ENSG00000198431 | thioredoxin reductase 1 [Source:HGNC Symbol;Acc:12437]                                                           | -1.54 | 3.8E-21 |
| SPINT1   | ENSG00000166145 | serine peptidase inhibitor, Kunitz type 1 [Source:HGNC Symbol;Acc:11246]                                         | -1.42 | 3.8E-21 |
| GUCA2A   | ENSG00000197273 | guanylate cyclase activator 2A (guanylin) [Source:HGNC Symbol;Acc:4682]                                          | -2.79 | 3.8E-21 |
| ANXA2    | ENSG00000182718 | annexin A2 [Source:HGNC Symbol;Acc:537]                                                                          | -1.05 | 4.0E-21 |
| --       | ENSG00000259607 | --                                                                                                               | -1.57 | 4.1E-21 |
| ANPEP    | ENSG00000166825 | alanyl (membrane) aminopeptidase [Source:HGNC Symbol;Acc:500]                                                    | -1.92 | 4.2E-21 |
| PPP1R11  | ENSG00000204619 | protein phosphatase 1, regulatory (inhibitor) subunit 11 [Source:HGNC Symbol;Acc:9285]                           | -1.21 | 4.6E-21 |
| SMPD3    | ENSG00000103056 | sphingomyelin phosphodiesterase 3, neutral membrane (neutral sphingomyelinase II) [Source:HGNC Symbol;Acc:14240] | -1.60 | 4.7E-21 |
| C1orf106 | ENSG00000163362 | chromosome 1 open reading frame 106 [Source:HGNC Symbol;Acc:25599]                                               | -1.31 | 4.9E-21 |
| IGSF9    | ENSG00000085552 | immunoglobulin superfamily, member 9 [Source:HGNC Symbol;Acc:18132]                                              | -2.24 | 5.1E-21 |
| AHNAK    | ENSG00000124942 | AHNAK nucleoprotein [Source:HGNC Symbol;Acc:347]                                                                 | -1.30 | 5.1E-21 |
| GJB4     | ENSG00000189433 | gap junction protein, beta 4, 30.3kDa [Source:HGNC Symbol;Acc:4286]                                              | -2.01 | 5.3E-21 |

|          |                 |                                                                                                              |       |         |
|----------|-----------------|--------------------------------------------------------------------------------------------------------------|-------|---------|
| SLC6A8   | ENSG00000130821 | solute carrier family 6 (neurotransmitter transporter), member 8 [Source:HGNC Symbol;Acc:11055]              | -1.70 | 5.7E-21 |
| MXRA5    | ENSG00000101825 | matrix-remodelling associated 5 [Source:HGNC Symbol;Acc:7539]                                                | -1.35 | 5.8E-21 |
| CYTH1    | ENSG00000108669 | cytohesin 1 [Source:HGNC Symbol;Acc:9501]                                                                    | -1.32 | 7.3E-21 |
| GRHL1    | ENSG00000134317 | grainyhead-like 1 (Drosophila) [Source:HGNC Symbol;Acc:17923]                                                | -1.58 | 8.3E-21 |
| TRIM16   | ENSG00000221926 | tripartite motif containing 16 [Source:HGNC Symbol;Acc:17241]                                                | -1.29 | 8.5E-21 |
| ECM1     | ENSG00000143369 | extracellular matrix protein 1 [Source:HGNC Symbol;Acc:3153]                                                 | -1.47 | 8.7E-21 |
| PSD4     | ENSG00000125637 | pleckstrin and Sec7 domain containing 4 [Source:HGNC Symbol;Acc:19096]                                       | -1.23 | 8.7E-21 |
| MICALCL  | ENSG00000133808 | MICAL C-terminal like [Source:HGNC Symbol;Acc:25933]                                                         | -1.90 | 9.2E-21 |
| GK       | ENSG00000198814 | glycerol kinase [Source:HGNC Symbol;Acc:4289]                                                                | -1.74 | 1.0E-20 |
| WSB1     | ENSG00000109046 | WD repeat and SOCS box containing 1 [Source:HGNC Symbol;Acc:19221]                                           | -1.70 | 1.3E-20 |
| HIST1H4H | ENSG00000158406 | histone cluster 1, H4h [Source:HGNC Symbol;Acc:4788]                                                         | -1.81 | 1.4E-20 |
| SGK1     | ENSG00000118515 | serum/glucocorticoid regulated kinase 1 [Source:HGNC Symbol;Acc:10810]                                       | -1.42 | 1.5E-20 |
| TPK1     | ENSG00000196511 | thiamin pyrophosphokinase 1 [Source:HGNC Symbol;Acc:17358]                                                   | -1.70 | 1.5E-20 |
| QSOX1    | ENSG00000116260 | quiescin Q6 sulfhydryl oxidase 1 [Source:HGNC Symbol;Acc:9756]                                               | -1.60 | 1.9E-20 |
| SYT12    | ENSG00000173227 | synaptotagmin XII [Source:HGNC Symbol;Acc:18381]                                                             | -2.18 | 1.9E-20 |
| ACTG1    | ENSG00000184009 | actin, gamma 1 [Source:HGNC Symbol;Acc:144]                                                                  | -1.03 | 2.0E-20 |
| RCAN1    | ENSG00000159200 | regulator of calcineurin 1 [Source:HGNC Symbol;Acc:3040]                                                     | -1.60 | 2.0E-20 |
| GPRIN1   | ENSG00000169258 | G protein regulated inducer of neurite outgrowth 1 [Source:HGNC Symbol;Acc:24835]                            | -1.86 | 2.4E-20 |
| SDR16C5  | ENSG00000170786 | short chain dehydrogenase/reductase family 16C, member 5 [Source:HGNC Symbol;Acc:30311]                      | -1.63 | 2.6E-20 |
| TFAP2C   | ENSG00000087510 | transcription factor AP-2 gamma (activating enhancer binding protein 2 gamma) [Source:HGNC Symbol;Acc:11744] | -1.55 | 2.7E-20 |
| DLG3     | ENSG00000082458 | discs, large homolog 3 (Drosophila) [Source:HGNC Symbol;Acc:2902]                                            | -1.07 | 2.8E-20 |

|          |                 |                                                                                      |       |         |
|----------|-----------------|--------------------------------------------------------------------------------------|-------|---------|
| CDH17    | ENSG00000079112 | cadherin 17, LI cadherin (liver-intestine) [Source:HGNC Symbol;Acc:1756]             | -1.69 | 2.9E-20 |
| PAX8-AS1 | ENSG00000189223 | PAX8 antisense RNA 1 [Source:HGNC Symbol;Acc:49271]                                  | -1.19 | 2.9E-20 |
| TRIM21   | ENSG00000132109 | tripartite motif containing 21 [Source:HGNC Symbol;Acc:11312]                        | -1.10 | 3.4E-20 |
| TMEM86A  | ENSG00000151117 | transmembrane protein 86A [Source:HGNC Symbol;Acc:26890]                             | -1.68 | 3.6E-20 |
| PIM1     | ENSG00000137193 | pim-1 oncogene [Source:HGNC Symbol;Acc:8986]                                         | -1.80 | 4.0E-20 |
| MMP28    | ENSG00000129270 | matrix metalloproteinase 28 [Source:HGNC Symbol;Acc:14366]                           | -2.37 | 4.2E-20 |
| IL10RB   | ENSG00000243646 | interleukin 10 receptor, beta [Source:HGNC Symbol;Acc:5965]                          | -1.27 | 4.2E-20 |
| SH3KBP1  | ENSG00000147010 | SH3-domain kinase binding protein 1 [Source:HGNC Symbol;Acc:13867]                   | -1.47 | 4.4E-20 |
| ENTPD8   | ENSG00000188833 | ectonucleoside triphosphate diphosphohydrolase 8 [Source:HGNC Symbol;Acc:24860]      | -2.35 | 4.6E-20 |
| TNFRSF21 | ENSG00000146072 | tumor necrosis factor receptor superfamily, member 21 [Source:HGNC Symbol;Acc:13469] | -1.33 | 4.9E-20 |
| TRAFD1   | ENSG00000135148 | TRAF-type zinc finger domain containing 1 [Source:HGNC Symbol;Acc:24808]             | -1.43 | 5.1E-20 |
| ACSS2    | ENSG00000131069 | acyl-CoA synthetase short-chain family member 2 [Source:HGNC Symbol;Acc:15814]       | -1.42 | 5.5E-20 |
| CCNYL1   | ENSG00000163249 | cyclin Y-like 1 [Source:HGNC Symbol;Acc:26868]                                       | -1.74 | 5.8E-20 |
| HRASLS2  | ENSG00000133328 | HRAS-like suppressor 2 [Source:HGNC Symbol;Acc:17824]                                | -2.21 | 5.9E-20 |
| GGT1     | ENSG00000100031 | gamma-glutamyltransferase 1 [Source:HGNC Symbol;Acc:4250]                            | -1.79 | 6.1E-20 |
| ATG9B    | ENSG00000181652 | autophagy related 9B [Source:HGNC Symbol;Acc:21899]                                  | -2.06 | 6.2E-20 |
| CAPN2    | ENSG00000162909 | calpain 2, (m/II) large subunit [Source:HGNC Symbol;Acc:1479]                        | -1.38 | 6.6E-20 |
| OSTF1    | ENSG00000134996 | osteoclast stimulating factor 1 [Source:HGNC Symbol;Acc:8510]                        | -1.19 | 7.4E-20 |
| DUOXA1   | ENSG00000140254 | dual oxidase maturation factor 1 [Source:HGNC Symbol;Acc:26507]                      | -2.63 | 7.8E-20 |
| GSN      | ENSG00000148180 | gelsolin [Source:HGNC Symbol;Acc:4620]                                               | -1.43 | 8.1E-20 |
| EFNB2    | ENSG00000125266 | ephrin-B2 [Source:HGNC Symbol;Acc:3227]                                              | -1.49 | 8.6E-20 |
| AMOTL2   | ENSG00000114019 | angiomin like 2 [Source:HGNC Symbol;Acc:17812]                                       | -1.35 | 9.9E-20 |



|         |                 |                                                                                                                               |       |         |
|---------|-----------------|-------------------------------------------------------------------------------------------------------------------------------|-------|---------|
| CEACAM6 | ENSG00000086548 | carcinoembryonic antigen-related cell adhesion molecule 6 (non-specific cross reacting antigen) [Source:HGNC Symbol;Acc:1818] | -2.04 | 1.1E-19 |
| VGLL1   | ENSG00000102243 | vestigial like 1 (Drosophila) [Source:HGNC Symbol;Acc:20985]                                                                  | -1.53 | 1.1E-19 |
| DOK4    | ENSG00000125170 | docking protein 4 [Source:HGNC Symbol;Acc:19868]                                                                              | -1.50 | 1.1E-19 |
| DNAH17  | ENSG00000187775 | dynein, axonemal, heavy chain 17 [Source:HGNC Symbol;Acc:2946]                                                                | -1.84 | 1.2E-19 |
| DUSP14  | ENSG00000161326 | dual specificity phosphatase 14 [Source:HGNC Symbol;Acc:17007]                                                                | -1.61 | 1.3E-19 |
| ITPR3   | ENSG00000096433 | inositol 1,4,5-trisphosphate receptor, type 3 [Source:HGNC Symbol;Acc:6182]                                                   | -1.31 | 1.3E-19 |
| EFNA2   | ENSG00000099617 | ephrin-A2 [Source:HGNC Symbol;Acc:3222]                                                                                       | -1.66 | 1.7E-19 |
| LPIN2   | ENSG00000101577 | lipin 2 [Source:HGNC Symbol;Acc:14450]                                                                                        | -1.26 | 1.8E-19 |
| PPP2R5B | ENSG00000068971 | protein phosphatase 2, regulatory subunit B', beta [Source:HGNC Symbol;Acc:9310]                                              | -1.76 | 1.8E-19 |
| ALAS1   | ENSG00000023330 | aminolevulinic acid synthase 1 [Source:HGNC Symbol;Acc:396]                                                                   | -1.38 | 1.8E-19 |
| ADTRP   | ENSG00000111863 | androgen-dependent TFPI-regulating protein [Source:HGNC Symbol;Acc:21214]                                                     | -1.90 | 1.9E-19 |
| PITPNC1 | ENSG00000154217 | phosphatidylinositol transfer protein, cytoplasmic 1 [Source:HGNC Symbol;Acc:21045]                                           | -1.10 | 1.9E-19 |
| ITGA3   | ENSG00000005884 | integrin, alpha 3 (antigen CD49C, alpha 3 subunit of VLA-3 receptor) [Source:HGNC Symbol;Acc:6139]                            | -1.57 | 1.9E-19 |
| CPE     | ENSG00000109472 | carboxypeptidase E [Source:HGNC Symbol;Acc:2303]                                                                              | -2.02 | 2.2E-19 |
| WASF2   | ENSG00000158195 | WAS protein family, member 2 [Source:HGNC Symbol;Acc:12733]                                                                   | -0.98 | 2.4E-19 |
| UGCG    | ENSG00000148154 | UDP-glucose ceramide glucosyltransferase [Source:HGNC Symbol;Acc:12524]                                                       | -1.60 | 2.6E-19 |
| IL15    | ENSG00000164136 | interleukin 15 [Source:HGNC Symbol;Acc:5977]                                                                                  | -1.97 | 2.7E-19 |
| FABP2   | ENSG00000145384 | fatty acid binding protein 2, intestinal [Source:HGNC Symbol;Acc:3556]                                                        | -1.69 | 2.9E-19 |
| PSEN1   | ENSG00000080815 | presenilin 1 [Source:HGNC Symbol;Acc:9508]                                                                                    | -1.06 | 3.0E-19 |
| PRSS3   | ENSG00000010438 | protease, serine, 3 [Source:HGNC Symbol;Acc:9486]                                                                             | -1.55 | 3.5E-19 |

|            |                 |                                                                                            |       |         |
|------------|-----------------|--------------------------------------------------------------------------------------------|-------|---------|
| SERPINB8   | ENSG00000166401 | serpin peptidase inhibitor, clade B (ovalbumin), member 8<br>[Source:HGNC Symbol;Acc:8952] | -1.67 | 3.6E-19 |
| RIPK1      | ENSG00000137275 | receptor (TNFRSF)-interacting serine-threonine kinase 1<br>[Source:HGNC Symbol;Acc:10019]  | -1.17 | 3.6E-19 |
| EPS8L1     | ENSG00000131037 | EPS8-like 1 [Source:HGNC Symbol;Acc:21295]                                                 | -2.21 | 3.7E-19 |
| DUSP4      | ENSG00000120875 | dual specificity phosphatase 4 [Source:HGNC Symbol;Acc:3070]                               | -1.75 | 4.0E-19 |
| SULT2B1    | ENSG00000088002 | sulfotransferase family, cytosolic, 2B, member 1 [Source:HGNC<br>Symbol;Acc:11459]         | -2.14 | 4.6E-19 |
| MUC17      | ENSG00000169876 | mucin 17, cell surface associated [Source:HGNC Symbol;Acc:16800]                           | -1.79 | 4.6E-19 |
| SH3TC2     | ENSG00000169247 | SH3 domain and tetratricopeptide repeats 2 [Source:HGNC<br>Symbol;Acc:29427]               | -1.20 | 4.6E-19 |
| SCNN1A     | ENSG00000111319 | sodium channel, non-voltage-gated 1 alpha subunit [Source:HGNC<br>Symbol;Acc:10599]        | -1.17 | 4.7E-19 |
| UBC        | ENSG00000150991 | ubiquitin C [Source:HGNC Symbol;Acc:12468]                                                 | -1.07 | 4.8E-19 |
| TMC7       | ENSG00000170537 | transmembrane channel-like 7 [Source:HGNC Symbol;Acc:23000]                                | -1.37 | 4.8E-19 |
| TRIM31-AS1 | ENSG00000231226 | TRIM31 antisense RNA 1 [Source:HGNC Symbol;Acc:39761]                                      | -1.62 | 5.5E-19 |
| PAX8       | ENSG00000125618 | paired box 8 [Source:HGNC Symbol;Acc:8622]                                                 | -1.35 | 5.7E-19 |
| S100A11    | ENSG00000163191 | S100 calcium binding protein A11 [Source:HGNC Symbol;Acc:10488]                            | -1.19 | 6.6E-19 |
| SH3GLB1    | ENSG00000097033 | SH3-domain GRB2-like endophilin B1 [Source:HGNC<br>Symbol;Acc:10833]                       | -1.47 | 7.0E-19 |
| PDGFA      | ENSG00000197461 | platelet-derived growth factor alpha polypeptide [Source:HGNC<br>Symbol;Acc:8799]          | -1.52 | 7.1E-19 |
| HEPH       | ENSG00000089472 | hephaestin [Source:HGNC Symbol;Acc:4866]                                                   | -1.23 | 7.3E-19 |
| TLDC1      | ENSG00000140950 | TBC/LysM-associated domain containing 1 [Source:HGNC<br>Symbol;Acc:29325]                  | -1.42 | 7.8E-19 |
| CCL28      | ENSG00000151882 | chemokine (C-C motif) ligand 28 [Source:HGNC Symbol;Acc:17700]                             | -1.54 | 7.9E-19 |
| GUCA2B     | ENSG00000044012 | guanylate cyclase activator 2B (uroguanylin) [Source:HGNC<br>Symbol;Acc:4683]              | -2.53 | 1.1E-18 |
| UPP1       | ENSG00000183696 | uridine phosphorylase 1 [Source:HGNC Symbol;Acc:12576]                                     | -1.80 | 1.3E-18 |

|          |                 |                                                                                                                 |       |         |
|----------|-----------------|-----------------------------------------------------------------------------------------------------------------|-------|---------|
| CD274    | ENSG00000120217 | CD274 molecule [Source:HGNC Symbol;Acc:17635]                                                                   | -1.93 | 1.3E-18 |
| NPC1     | ENSG00000141458 | Niemann-Pick disease, type C1 [Source:HGNC Symbol;Acc:7897]                                                     | -1.23 | 1.6E-18 |
| TBC1D8   | ENSG00000204634 | TBC1 domain family, member 8 (with GRAM domain) [Source:HGNC Symbol;Acc:17791]                                  | -1.38 | 1.9E-18 |
| TMEM253  | ENSG00000232070 | transmembrane protein 253 [Source:HGNC Symbol;Acc:32545]                                                        | -1.63 | 2.0E-18 |
| MIDN     | ENSG00000167470 | midnolin [Source:HGNC Symbol;Acc:16298]                                                                         | -1.44 | 2.2E-18 |
| SHC1     | ENSG00000160691 | SHC (Src homology 2 domain containing) transforming protein 1 [Source:HGNC Symbol;Acc:10840]                    | -1.16 | 2.2E-18 |
| ZNFX1    | ENSG00000124201 | zinc finger, NFX1-type containing 1 [Source:HGNC Symbol;Acc:29271]                                              | -1.06 | 2.3E-18 |
| TRIM29   | ENSG00000137699 | tripartite motif containing 29 [Source:HGNC Symbol;Acc:17274]                                                   | -1.79 | 2.3E-18 |
| VIMP     | ENSG00000131871 | VCP-interacting membrane protein [Source:HGNC Symbol;Acc:30396]                                                 | -1.11 | 2.3E-18 |
| --       | ENSG00000272899 | --                                                                                                              | -1.65 | 2.4E-18 |
| RHOC     | ENSG00000155366 | ras homolog family member C [Source:HGNC Symbol;Acc:669]                                                        | -1.60 | 2.6E-18 |
| GBP3     | ENSG00000117226 | guanylate binding protein 3 [Source:HGNC Symbol;Acc:4184]                                                       | -1.77 | 3.2E-18 |
| WSB2     | ENSG00000176871 | WD repeat and SOCS box containing 2 [Source:HGNC Symbol;Acc:19222]                                              | -1.22 | 3.2E-18 |
| --       | ENSG00000233589 | --                                                                                                              | -1.47 | 3.4E-18 |
| NOSTRIN  | ENSG00000163072 | nitric oxide synthase trafficking family with sequence similarity 160, member A2 [Source:HGNC Symbol;Acc:20203] | -1.78 | 3.6E-18 |
| FAM160A2 | ENSG00000051009 | nuclear protein localization 4 homolog ( <i>S. cerevisiae</i> ) [Source:HGNC Symbol;Acc:25378]                  | -1.27 | 3.8E-18 |
| NPLOC4   | ENSG00000182446 | optineurin [Source:HGNC Symbol;Acc:17142]                                                                       | -1.24 | 4.3E-18 |
| OPTN     | ENSG00000123240 | acetylcholinesterase (Yt blood group) [Source:HGNC Symbol;Acc:108]                                              | -1.40 | 4.5E-18 |
| ACHE     | ENSG00000087085 | tubulin, beta 2A class IIa [Source:HGNC Symbol;Acc:12412]                                                       | -2.39 | 4.6E-18 |
| TUBB2A   | ENSG00000137267 | acyl-CoA thioesterase 9 [Source:HGNC Symbol;Acc:17152]                                                          | -1.55 | 4.6E-18 |
| ACOT9    | ENSG00000123130 | Rho GTPase activating protein 30 [Source:HGNC Symbol;Acc:27414]                                                 | -1.09 | 5.2E-18 |
| ARHGAP30 | ENSG00000186517 | calsyntenin 1 [Source:HGNC Symbol;Acc:17447]                                                                    | -1.81 | 5.3E-18 |
| CLSTN1   | ENSG00000171603 |                                                                                                                 | -1.08 | 5.5E-18 |

|          |                 |                                                                                                                              |       |         |
|----------|-----------------|------------------------------------------------------------------------------------------------------------------------------|-------|---------|
| CNNM2    | ENSG00000148842 | cyclin M2 [Source:HGNC Symbol;Acc:103]                                                                                       | -1.20 | 5.8E-18 |
| PLEKHA7  | ENSG00000166689 | pleckstrin homology domain containing, family A member 7 [Source:HGNC Symbol;Acc:27049]                                      | -1.21 | 7.3E-18 |
| MGAT4A   | ENSG00000071073 | mannosyl (alpha-1,3-)-glycoprotein beta-1,4-N-acetylglucosaminyltransferase, isozyme A [Source:HGNC Symbol;Acc:7047]         | -1.72 | 7.6E-18 |
| ZFYVE1   | ENSG00000165861 | zinc finger, FYVE domain containing 1 [Source:HGNC Symbol;Acc:13180]                                                         | -1.37 | 7.6E-18 |
| MYLK     | ENSG00000065534 | myosin light chain kinase [Source:HGNC Symbol;Acc:7590]                                                                      | -1.53 | 7.9E-18 |
| SPPL2A   | ENSG00000138600 | signal peptide peptidase like 2A [Source:HGNC Symbol;Acc:30227]                                                              | -1.52 | 8.6E-18 |
| ECE1     | ENSG00000117298 | endothelin converting enzyme 1 [Source:HGNC Symbol;Acc:3146]                                                                 | -1.48 | 8.6E-18 |
| ABTB2    | ENSG00000166016 | ankyrin repeat and BTB (POZ) domain containing 2 [Source:HGNC Symbol;Acc:23842]                                              | -1.38 | 8.9E-18 |
| ELOVL1   | ENSG00000066322 | ELOVL fatty acid elongase 1 [Source:HGNC Symbol;Acc:14418]                                                                   | -1.19 | 1.1E-17 |
| ZBTB43   | ENSG00000169155 | zinc finger and BTB domain containing 43 [Source:HGNC Symbol;Acc:17908]                                                      | -1.23 | 1.1E-17 |
| PLA2G2F  | ENSG00000158786 | phospholipase A2, group IIF [Source:HGNC Symbol;Acc:30040]                                                                   | -2.06 | 1.2E-17 |
| OAS1     | ENSG00000089127 | 2'-5'-oligoadenylate synthetase 1, 40/46kDa [Source:HGNC Symbol;Acc:8086]                                                    | -1.16 | 1.3E-17 |
| SLC9A3R1 | ENSG00000109062 | solute carrier family 9, subfamily A (NHE3, cation proton antiporter 3), member 3 regulator 1 [Source:HGNC Symbol;Acc:11075] | -1.33 | 1.3E-17 |
| MYH14    | ENSG00000105357 | myosin, heavy chain 14, non-muscle [Source:HGNC Symbol;Acc:23212]                                                            | -1.47 | 1.5E-17 |
| CCDC120  | ENSG00000147144 | coiled-coil domain containing 120 [Source:HGNC Symbol;Acc:28910]                                                             | -1.28 | 1.5E-17 |
| ALS2CL   | ENSG00000178038 | ALS2 C-terminal like [Source:HGNC Symbol;Acc:20605]                                                                          | -1.87 | 1.5E-17 |
| DAPP1    | ENSG00000070190 | dual adaptor of phosphotyrosine and 3-phosphoinositides [Source:HGNC Symbol;Acc:16500]                                       | -1.60 | 1.6E-17 |
| PRRG1    | ENSG00000130962 | proline rich Gla (G-carboxyglutamic acid) 1 [Source:HGNC Symbol;Acc:9469]                                                    | -1.73 | 1.6E-17 |

|          |                 |                                                                                                   |       |         |
|----------|-----------------|---------------------------------------------------------------------------------------------------|-------|---------|
| RSAD2    | ENSG00000134321 | radical S-adenosyl methionine domain containing 2 [Source:HGNC Symbol;Acc:30908]                  | -2.34 | 1.7E-17 |
| FOXO1    | ENSG00000150907 | forkhead box O1 [Source:HGNC Symbol;Acc:3819]                                                     | -1.59 | 1.8E-17 |
| RAPH1    | ENSG00000173166 | Ras association (RalGDS/AF-6) and pleckstrin homology domains 1 [Source:HGNC Symbol;Acc:14436]    | -1.41 | 1.9E-17 |
| KIAA0226 | ENSG00000145016 | KIAA0226 [Source:HGNC Symbol;Acc:28991]                                                           | -1.20 | 2.2E-17 |
| VRK3     | ENSG00000105053 | vaccinia related kinase 3 [Source:HGNC Symbol;Acc:18996]                                          | -1.10 | 2.3E-17 |
| CSRNP1   | ENSG00000144655 | cysteine-serine-rich nuclear protein 1 [Source:HGNC Symbol;Acc:14300]                             | -1.68 | 2.3E-17 |
| SEMA7A   | ENSG00000138623 | semaphorin 7A, GPI membrane anchor (John Milton Hagen blood group) [Source:HGNC Symbol;Acc:10741] | -2.06 | 2.9E-17 |
| AKAP13   | ENSG00000170776 | A kinase (PRKA) anchor protein 13 [Source:HGNC Symbol;Acc:371]                                    | -1.07 | 2.9E-17 |
| MUC20    | ENSG00000176945 | mucin 20, cell surface associated [Source:HGNC Symbol;Acc:23282]                                  | -1.15 | 3.0E-17 |
| MARVELD3 | ENSG00000140832 | MARVEL domain containing 3 [Source:HGNC Symbol;Acc:30525]                                         | -1.09 | 3.2E-17 |
| LYST     | ENSG00000143669 | lysosomal trafficking regulator [Source:HGNC Symbol;Acc:1968]                                     | -1.68 | 3.3E-17 |
| KLF4     | ENSG00000136826 | Kruppel-like factor 4 (gut) [Source:HGNC Symbol;Acc:6348]                                         | -1.59 | 3.6E-17 |
| MAP3K8   | ENSG00000107968 | mitogen-activated protein kinase kinase kinase 8 [Source:HGNC Symbol;Acc:6860]                    | -1.42 | 3.8E-17 |
| TSC22D2  | ENSG00000196428 | TSC22 domain family, member 2 [Source:HGNC Symbol;Acc:29095]                                      | -1.34 | 3.9E-17 |
| ZFP36    | ENSG00000128016 | ZFP36 ring finger protein [Source:HGNC Symbol;Acc:12862]                                          | -1.62 | 4.0E-17 |
| SUN1     | ENSG00000164828 | Sad1 and UNC84 domain containing 1 [Source:HGNC Symbol;Acc:18587]                                 | -1.11 | 4.0E-17 |
| RAB9A    | ENSG00000123595 | RAB9A, member RAS oncogene family [Source:HGNC Symbol;Acc:9792]                                   | -1.26 | 4.1E-17 |
| RAP2B    | ENSG00000181467 | RAP2B, member of RAS oncogene family [Source:HGNC Symbol;Acc:9862]                                | -1.23 | 4.2E-17 |
| MYEOV    | ENSG00000172927 | myeloma overexpressed [Source:HGNC Symbol;Acc:7563]                                               | -1.26 | 4.3E-17 |
| RARRES3  | ENSG00000133321 | retinoic acid receptor responder (tazarotene induced) 3 [Source:HGNC Symbol;Acc:9869]             | -1.31 | 4.3E-17 |

|          |                 |                                                                                                                          |       |         |
|----------|-----------------|--------------------------------------------------------------------------------------------------------------------------|-------|---------|
| KIAA0040 | ENSG00000235750 | KIAA0040 [Source:HGNC Symbol;Acc:28950]<br>DnaJ (Hsp40) homolog, subfamily C, member 5 [Source:HGNC<br>Symbol;Acc:16235] | -1.19 | 4.5E-17 |
| DNAJC5   | ENSG00000101152 | pyruvate dehydrogenase phosphatase catalytic subunit 1<br>[Source:HGNC Symbol;Acc:9279]                                  | -1.47 | 4.6E-17 |
| PDP1     | ENSG00000164951 | oxysterol binding protein 2 [Source:HGNC Symbol;Acc:8504]                                                                | -1.49 | 4.7E-17 |
| OSBP2    | ENSG00000184792 | perilipin 3 [Source:HGNC Symbol;Acc:16893]                                                                               | -1.56 | 4.7E-17 |
| PLIN3    | ENSG00000105355 | proprotein convertase subtilisin/kexin type 5 [Source:HGNC<br>Symbol;Acc:8747]                                           | -1.48 | 4.8E-17 |
| PCSK5    | ENSG00000099139 | tripartite motif containing 15 [Source:HGNC Symbol;Acc:16284]                                                            | -1.55 | 5.0E-17 |
| TRIM15   | ENSG00000204610 | caspase 5, apoptosis-related cysteine peptidase [Source:HGNC<br>Symbol;Acc:1506]                                         | -1.84 | 5.5E-17 |
| CASP5    | ENSG00000137757 | egl-9 family hypoxia-inducible factor 3 [Source:HGNC<br>Symbol;Acc:14661]                                                | -1.92 | 5.6E-17 |
| EGLN3    | ENSG00000129521 | chromosome 1 open reading frame 115 [Source:HGNC<br>Symbol;Acc:25873]                                                    | -1.59 | 5.8E-17 |
| C1orf115 | ENSG00000162817 | interferon regulatory factor 6 [Source:HGNC Symbol;Acc:6121]                                                             | -1.55 | 6.8E-17 |
| IRF6     | ENSG00000117595 | kallikrein-related peptidase 12 [Source:HGNC Symbol;Acc:6360]                                                            | -1.12 | 7.1E-17 |
| KLK12    | ENSG00000186474 | human immunodeficiency virus type I enhancer binding protein 2<br>[Source:HGNC Symbol;Acc:4921]                          | -2.32 | 7.2E-17 |
| HIVEP2   | ENSG00000010818 | myosin, light chain 12A, regulatory, non-sarcomeric [Source:HGNC<br>Symbol;Acc:16701]                                    | -1.52 | 7.5E-17 |
| MYL12A   | ENSG00000101608 | chromosome 6 open reading frame 132 [Source:HGNC<br>Symbol;Acc:21288]                                                    | -1.17 | 7.6E-17 |
| C6orf132 | ENSG00000188112 | adiponectin receptor 2 [Source:HGNC Symbol;Acc:24041]                                                                    | -1.37 | 7.7E-17 |
| ADIPOR2  | ENSG00000006831 | LY6/PLAUR domain containing 5 [Source:HGNC Symbol;Acc:26397]                                                             | -1.00 | 8.2E-17 |
| LYPD5    | ENSG00000159871 | desmocollin 2 [Source:HGNC Symbol;Acc:3036]                                                                              | -1.81 | 8.3E-17 |
| DSC2     | ENSG00000134755 | solute carrier family 9, subfamily A (NHE3, cation proton antiporter 3),<br>member 3 [Source:HGNC Symbol;Acc:11073]      | -1.60 | 8.3E-17 |
| SLC9A3   | ENSG00000066230 |                                                                                                                          | -2.28 | 8.5E-17 |

|          |                 |                                                                                           |       |         |
|----------|-----------------|-------------------------------------------------------------------------------------------|-------|---------|
| TMEM176B | ENSG00000106565 | transmembrane protein 176B [Source:HGNC Symbol;Acc:29596]                                 | -1.23 | 9.0E-17 |
| BMP2     | ENSG00000125845 | bone morphogenetic protein 2 [Source:HGNC Symbol;Acc:1069]                                | -1.72 | 1.1E-16 |
| --       | ENSG00000267601 | --                                                                                        | -1.97 | 1.2E-16 |
| KCNK1    | ENSG00000135750 | potassium channel, subfamily K, member 1 [Source:HGNC Symbol;Acc:6272]                    | -1.11 | 1.2E-16 |
| ATG4A    | ENSG00000101844 | autophagy related 4A, cysteine peptidase [Source:HGNC Symbol;Acc:16489]                   | -1.39 | 1.3E-16 |
| VIPR1    | ENSG00000114812 | vasoactive intestinal peptide receptor 1 [Source:HGNC Symbol;Acc:12694]                   | -1.38 | 1.3E-16 |
| SSUH2    | ENSG00000125046 | ssu-2 homolog (C. elegans) [Source:HGNC Symbol;Acc:24809]                                 | -2.32 | 1.3E-16 |
| SEMG2    | ENSG00000124157 | semenogelin II [Source:HGNC Symbol;Acc:10743]                                             | -1.61 | 1.3E-16 |
| HLA-E    | ENSG00000204592 | major histocompatibility complex, class I, E [Source:HGNC Symbol;Acc:4962]                | -1.23 | 1.4E-16 |
| ZZEF1    | ENSG00000074755 | zinc finger, ZZ-type with EF-hand domain 1 [Source:HGNC Symbol;Acc:29027]                 | -1.23 | 1.4E-16 |
| BHLHE40  | ENSG00000134107 | basic helix-loop-helix family, member e40 [Source:HGNC Symbol;Acc:1046]                   | -1.33 | 1.5E-16 |
| VEGFA    | ENSG00000112715 | vascular endothelial growth factor A [Source:HGNC Symbol;Acc:12680]                       | -1.47 | 1.7E-16 |
| GTPBP2   | ENSG00000172432 | GTP binding protein 2 [Source:HGNC Symbol;Acc:4670]                                       | -1.38 | 1.8E-16 |
| --       | ENSG00000235434 | --                                                                                        | -1.77 | 1.8E-16 |
| GLTP     | ENSG00000139433 | glycolipid transfer protein [Source:HGNC Symbol;Acc:24867]                                | -1.13 | 1.9E-16 |
| USP53    | ENSG00000145390 | ubiquitin specific peptidase 53 [Source:HGNC Symbol;Acc:29255]                            | -1.64 | 1.9E-16 |
| TM4SF4   | ENSG00000169903 | transmembrane 4 L six family member 4 [Source:HGNC Symbol;Acc:11856]                      | -1.64 | 1.9E-16 |
| IFNAR2   | ENSG00000159110 | interferon (alpha, beta and omega) receptor 2 [Source:HGNC Symbol;Acc:5433]               | -1.15 | 1.9E-16 |
| CEACAM19 | ENSG00000186567 | carcinoembryonic antigen-related cell adhesion molecule 19 [Source:HGNC Symbol;Acc:31951] | -1.88 | 2.0E-16 |

|          |                 |                                                                                                      |       |         |
|----------|-----------------|------------------------------------------------------------------------------------------------------|-------|---------|
| MROH3P   | ENSG00000233217 | maestro heat-like repeat family member 3, pseudogene<br>[Source:HGNC Symbol;Acc:33122]               | -2.54 | 2.0E-16 |
| MAPK8IP1 | ENSG00000121653 | mitogen-activated protein kinase 8 interacting protein 1<br>[Source:HGNC Symbol;Acc:6882]            | -1.49 | 2.0E-16 |
| SAMD9    | ENSG00000205413 | sterile alpha motif domain containing 9 [Source:HGNC<br>Symbol;Acc:1348]                             | -2.11 | 2.0E-16 |
| ASAP2    | ENSG00000151693 | ArfGAP with SH3 domain, ankyrin repeat and PH domain 2<br>[Source:HGNC Symbol;Acc:2721]              | -1.32 | 2.0E-16 |
| PTK6     | ENSG00000101213 | protein tyrosine kinase 6 [Source:HGNC Symbol;Acc:9617]                                              | -1.44 | 2.0E-16 |
| DCTN2    | ENSG00000175203 | dynactin 2 (p50) [Source:HGNC Symbol;Acc:2712]                                                       | -1.01 | 2.0E-16 |
| BMF      | ENSG00000104081 | Bcl2 modifying factor [Source:HGNC Symbol;Acc:24132]                                                 | -1.51 | 2.1E-16 |
| ATP6V1D  | ENSG00000100554 | ATPase, H <sup>+</sup> transporting, lysosomal 34kDa, V1 subunit D<br>[Source:HGNC Symbol;Acc:13527] | -1.23 | 2.5E-16 |
| KALRN    | ENSG00000160145 | kalirin, RhoGEF kinase [Source:HGNC Symbol;Acc:4814]                                                 | -1.40 | 2.5E-16 |
| ERN1     | ENSG00000178607 | endoplasmic reticulum to nucleus signaling 1 [Source:HGNC<br>Symbol;Acc:3449]                        | -1.12 | 2.6E-16 |
| VWA7     | ENSG00000204396 | von Willebrand factor A domain containing 7 [Source:HGNC<br>Symbol;Acc:13939]                        | -1.60 | 2.7E-16 |
| CD24P4   | ENSG00000185275 | CD24 molecule pseudogene 4 [Source:HGNC Symbol;Acc:1649]                                             | -1.53 | 3.1E-16 |
| RNF103   | ENSG00000239305 | ring finger protein 103 [Source:HGNC Symbol;Acc:12859]                                               | -1.42 | 3.1E-16 |
| GIPR     | ENSG00000010310 | gastric inhibitory polypeptide receptor [Source:HGNC<br>Symbol;Acc:4271]                             | -1.86 | 3.4E-16 |
| ERRFI1   | ENSG00000116285 | ERBB receptor feedback inhibitor 1 [Source:HGNC Symbol;Acc:18185]                                    | -1.42 | 3.5E-16 |
| USH1C    | ENSG00000006611 | Usher syndrome 1C (autosomal recessive, severe) [Source:HGNC<br>Symbol;Acc:12597]                    | -1.00 | 3.6E-16 |
| PXN      | ENSG00000089159 | paxillin [Source:HGNC Symbol;Acc:9718]                                                               | -1.20 | 3.6E-16 |
| RECQL5   | ENSG00000108469 | RecQ protein-like 5 [Source:HGNC Symbol;Acc:9950]                                                    | -1.73 | 3.7E-16 |
| RNASE1   | ENSG00000129538 | ribonuclease, RNase A family, 1 (pancreatic) [Source:HGNC<br>Symbol;Acc:10044]                       | -1.39 | 3.8E-16 |



|           |                 |                                                                                                          |       |         |
|-----------|-----------------|----------------------------------------------------------------------------------------------------------|-------|---------|
| N4BP1     | ENSG00000102921 | NEDD4 binding protein 1 [Source:HGNC Symbol;Acc:29850]                                                   | -1.27 | 3.9E-16 |
| RAP2C-AS1 | ENSG00000232160 | RAP2C antisense RNA 1 [Source:HGNC Symbol;Acc:40957]                                                     | -1.96 | 4.1E-16 |
| IRAK2     | ENSG00000134070 | interleukin-1 receptor-associated kinase 2 [Source:HGNC Symbol;Acc:6113]                                 | -1.52 | 4.3E-16 |
| ATP13A2   | ENSG00000159363 | ATPase type 13A2 [Source:HGNC Symbol;Acc:30213]                                                          | -1.62 | 4.3E-16 |
| --        | ENSG00000228363 | --                                                                                                       | -1.34 | 4.4E-16 |
| CYB5R3    | ENSG00000100243 | cytochrome b5 reductase 3 [Source:HGNC Symbol;Acc:2873]                                                  | -1.33 | 4.5E-16 |
| BCL2L1    | ENSG00000171552 | BCL2-like 1 [Source:HGNC Symbol;Acc:992]                                                                 | -1.37 | 4.5E-16 |
| B3GALT5   | ENSG00000183778 | UDP-Gal:betaGlcNAc beta 1,3-galactosyltransferase, polypeptide 5 [Source:HGNC Symbol;Acc:920]            | -1.23 | 4.7E-16 |
| KIAA1217  | ENSG00000120549 | KIAA1217 [Source:HGNC Symbol;Acc:25428]                                                                  | -1.30 | 5.0E-16 |
| KCNK5     | ENSG00000164626 | potassium channel, subfamily K, member 5 [Source:HGNC Symbol;Acc:6280]                                   | -1.43 | 5.1E-16 |
| S100A16   | ENSG00000188643 | S100 calcium binding protein A16 [Source:HGNC Symbol;Acc:20441]                                          | -1.26 | 6.1E-16 |
| DENND2C   | ENSG00000175984 | DENN/MADD domain containing 2C [Source:HGNC Symbol;Acc:24748]                                            | -1.93 | 6.5E-16 |
| ZFAND3    | ENSG00000156639 | zinc finger, AN1-type domain 3 [Source:HGNC Symbol;Acc:18019]                                            | -1.00 | 7.4E-16 |
| PNCK      | ENSG00000130822 | pregnancy up-regulated nonubiquitous CaM kinase [Source:HGNC Symbol;Acc:13415]                           | -1.69 | 7.5E-16 |
| MGAT3     | ENSG00000128268 | mannosyl (beta-1,4-)-glycoprotein beta-1,4-N-acetylglucosaminyltransferase [Source:HGNC Symbol;Acc:7046] | -1.36 | 7.9E-16 |
| SLC5A1    | ENSG00000100170 | solute carrier family 5 (sodium/glucose cotransporter), member 1 [Source:HGNC Symbol;Acc:11036]          | -1.36 | 8.0E-16 |
| NOS3      | ENSG00000164867 | nitric oxide synthase 3 (endothelial cell) [Source:HGNC Symbol;Acc:7876]                                 | -1.74 | 8.3E-16 |
| ZMIZ1     | ENSG00000108175 | zinc finger, MIZ-type containing 1 [Source:HGNC Symbol;Acc:16493]                                        | -1.04 | 8.7E-16 |
| SMIM6     | ENSG00000259120 | small integral membrane protein 6 [Source:HGNC Symbol;Acc:40032]                                         | -1.86 | 8.8E-16 |
| NPAS2     | ENSG00000170485 | neuronal PAS domain protein 2 [Source:HGNC Symbol;Acc:7895]                                              | -1.00 | 8.8E-16 |
| IL32      | ENSG00000008517 | interleukin 32 [Source:HGNC Symbol;Acc:16830]                                                            | -1.58 | 9.5E-16 |

|          |                 |                                                                                                                                                         |       |         |
|----------|-----------------|---------------------------------------------------------------------------------------------------------------------------------------------------------|-------|---------|
| ALPPL2   | ENSG00000163286 | alkaline phosphatase, placental-like 2 [Source:HGNC Symbol;Acc:441]<br>family with sequence similarity 114, member A1 [Source:HGNC<br>Symbol;Acc:25087] | -1.67 | 1.0E-15 |
| FAM114A1 | ENSG00000197712 |                                                                                                                                                         | -1.08 | 1.0E-15 |
| PIAS1    | ENSG00000033800 | protein inhibitor of activated STAT, 1 [Source:HGNC Symbol;Acc:2752]                                                                                    | -1.25 | 1.0E-15 |
| ALDOB    | ENSG00000136872 | aldolase B, fructose-bisphosphate [Source:HGNC Symbol;Acc:417]                                                                                          | -1.90 | 1.1E-15 |
| ARHGEF35 | ENSG00000213214 | Rho guanine nucleotide exchange factor (GEF) 35 [Source:HGNC<br>Symbol;Acc:33846]                                                                       | -1.28 | 1.1E-15 |
| CTSZ     | ENSG00000101160 | cathepsin Z [Source:HGNC Symbol;Acc:2547]                                                                                                               | -1.14 | 1.2E-15 |
| WIPF2    | ENSG00000171475 | WAS/WASL interacting protein family, member 2 [Source:HGNC<br>Symbol;Acc:30923]                                                                         | -0.99 | 1.2E-15 |
| KLF6     | ENSG00000067082 | Kruppel-like factor 6 [Source:HGNC Symbol;Acc:2235]                                                                                                     | -1.49 | 1.3E-15 |
| CEACAM5  | ENSG00000105388 | carcinoembryonic antigen-related cell adhesion molecule 5<br>[Source:HGNC Symbol;Acc:1817]                                                              | -1.84 | 1.3E-15 |
| OSBPL2   | ENSG00000130703 | oxysterol binding protein-like 2 [Source:HGNC Symbol;Acc:15761]                                                                                         | -0.86 | 1.3E-15 |
| DBNL     | ENSG00000136279 | drebrin-like [Source:HGNC Symbol;Acc:2696]                                                                                                              | -1.06 | 1.4E-15 |
| GNA15    | ENSG00000060558 | guanine nucleotide binding protein (G protein), alpha 15 (Gq class)<br>[Source:HGNC Symbol;Acc:4383]                                                    | -1.65 | 1.5E-15 |
| CCNG2    | ENSG00000138764 | cyclin G2 [Source:HGNC Symbol;Acc:1593]                                                                                                                 | -1.95 | 1.5E-15 |
| HLA-F    | ENSG00000204642 | major histocompatibility complex, class I, F [Source:HGNC<br>Symbol;Acc:4963]                                                                           | -1.57 | 1.5E-15 |
| --       | ENSG00000255811 | --                                                                                                                                                      | -2.10 | 1.6E-15 |
| EHD2     | ENSG00000024422 | EH-domain containing 2 [Source:HGNC Symbol;Acc:3243]                                                                                                    | -1.42 | 1.6E-15 |
| MTMR11   | ENSG00000014914 | myotubularin related protein 11 [Source:HGNC Symbol;Acc:24307]                                                                                          | -1.16 | 1.7E-15 |
| TRPV3    | ENSG00000167723 | transient receptor potential cation channel, subfamily V, member 3<br>[Source:HGNC Symbol;Acc:18084]                                                    | -2.43 | 1.7E-15 |
| PLAU     | ENSG00000122861 | plasminogen activator, urokinase [Source:HGNC Symbol;Acc:9052]                                                                                          | -2.17 | 1.8E-15 |
| HLA-J    | ENSG00000204622 | major histocompatibility complex, class I, J (pseudogene)<br>[Source:HGNC Symbol;Acc:4967]                                                              | -1.70 | 1.8E-15 |

|           |                 |                                                                                                                                                                        |       |         |
|-----------|-----------------|------------------------------------------------------------------------------------------------------------------------------------------------------------------------|-------|---------|
| TMEM120A  | ENSG00000189077 | transmembrane protein 120A [Source:HGNC Symbol;Acc:21697]<br>long intergenic non-protein coding RNA 35 [Source:HGNC<br>Symbol;Acc:18289]                               | -1.39 | 1.8E-15 |
| LINC00035 | ENSG00000225969 |                                                                                                                                                                        | -2.44 | 1.9E-15 |
| FABP1     | ENSG00000163586 | fatty acid binding protein 1, liver [Source:HGNC Symbol;Acc:3555]                                                                                                      | -1.56 | 2.1E-15 |
| KLF7      | ENSG00000118263 | Kruppel-like factor 7 (ubiquitous) [Source:HGNC Symbol;Acc:6350]                                                                                                       | -1.13 | 2.2E-15 |
| RIT1      | ENSG00000143622 | Ras-like without CAAX 1 [Source:HGNC Symbol;Acc:10023]<br>sterile alpha motif domain containing 8 [Source:HGNC<br>Symbol;Acc:26320]                                    | -1.14 | 2.2E-15 |
| SAMD8     | ENSG00000156671 |                                                                                                                                                                        | -1.32 | 2.5E-15 |
| GSDMB     | ENSG00000073605 | gasdermin B [Source:HGNC Symbol;Acc:23690]                                                                                                                             | -1.00 | 2.5E-15 |
| MYL12B    | ENSG00000118680 | myosin, light chain 12B, regulatory [Source:HGNC Symbol;Acc:29827]                                                                                                     | -1.11 | 2.6E-15 |
| IFNWP19   | ENSG00000238271 | interferon, omega 1 pseudogene 19 [Source:HGNC Symbol;Acc:5451]<br>ATPase, H <sup>+</sup> transporting, lysosomal 31kDa, V1 subunit E1<br>[Source:HGNC Symbol;Acc:857] | -1.78 | 2.9E-15 |
| ATP6V1E1  | ENSG00000131100 |                                                                                                                                                                        | -0.95 | 2.9E-15 |
| --        | ENSG00000267308 | --                                                                                                                                                                     | -1.41 | 2.9E-15 |
| HMOX1     | ENSG00000100292 | heme oxygenase (decycling) 1 [Source:HGNC Symbol;Acc:5013]<br>breast cancer anti-estrogen resistance 3 [Source:HGNC<br>Symbol;Acc:973]                                 | -1.54 | 3.0E-15 |
| BCAR3     | ENSG00000137936 |                                                                                                                                                                        | -1.32 | 3.1E-15 |
| ZBTB7B    | ENSG00000160685 | zinc finger and BTB domain containing 7B [Source:HGNC<br>Symbol;Acc:18668]                                                                                             | -1.58 | 3.1E-15 |
| SH3RF1    | ENSG00000154447 | SH3 domain containing ring finger 1 [Source:HGNC<br>Symbol;Acc:17650]                                                                                                  | -1.32 | 3.1E-15 |
| KCNK6     | ENSG00000099337 | potassium channel, subfamily K, member 6 [Source:HGNC<br>Symbol;Acc:6281]                                                                                              | -1.21 | 3.1E-15 |
| SEMA3B    | ENSG00000012171 | sema domain, immunoglobulin domain (Ig), short basic domain,<br>secreted, (semaphorin) 3B [Source:HGNC Symbol;Acc:10724]                                               | -2.05 | 3.5E-15 |
| POU5F1    | ENSG00000204531 | POU class 5 homeobox 1 [Source:HGNC Symbol;Acc:9221]<br>secretory leukocyte peptidase inhibitor [Source:HGNC<br>Symbol;Acc:11092]                                      | -1.47 | 3.8E-15 |
| SLPI      | ENSG00000124107 |                                                                                                                                                                        | -1.52 | 3.9E-15 |
| EVI2B     | ENSG00000185862 | ecotropic viral integration site 2B [Source:HGNC Symbol;Acc:3500]                                                                                                      | -2.35 | 4.3E-15 |

|           |                 |                                                                               |       |         |
|-----------|-----------------|-------------------------------------------------------------------------------|-------|---------|
| KLK1      | ENSG00000167748 | kallikrein 1 [Source:HGNC Symbol;Acc:6357]                                    | -1.08 | 4.3E-15 |
| NMB       | ENSG00000197696 | neuromedin B [Source:HGNC Symbol;Acc:7842]                                    | -1.41 | 4.4E-15 |
| --        | ENSG00000233271 | --                                                                            | -1.94 | 4.4E-15 |
| HLA-B     | ENSG00000234745 | major histocompatibility complex, class I, B [Source:HGNC Symbol;Acc:4932]    | -1.07 | 4.6E-15 |
| RAB11FIP1 | ENSG00000156675 | RAB11 family interacting protein 1 (class I) [Source:HGNC Symbol;Acc:30265]   | -1.01 | 5.0E-15 |
| TMEM61    | ENSG00000143001 | transmembrane protein 61 [Source:HGNC Symbol;Acc:27296]                       | -1.84 | 5.2E-15 |
| ARF6      | ENSG00000165527 | ADP-ribosylation factor 6 [Source:HGNC Symbol;Acc:659]                        | -0.91 | 5.2E-15 |
| FXD3      | ENSG00000089356 | FXD domain containing ion transport regulator 3 [Source:HGNC Symbol;Acc:4027] | -1.33 | 5.3E-15 |
| GPR78     | ENSG00000155269 | G protein-coupled receptor 78 [Source:HGNC Symbol;Acc:4528]                   | -3.13 | 5.5E-15 |
| SERTAD2   | ENSG00000179833 | SERTA domain containing 2 [Source:HGNC Symbol;Acc:30784]                      | -1.37 | 5.9E-15 |
| NDEL1     | ENSG00000166579 | nudE neurodevelopment protein 1-like 1 [Source:HGNC Symbol;Acc:17620]         | -1.02 | 6.1E-15 |
| C3orf52   | ENSG00000114529 | chromosome 3 open reading frame 52 [Source:HGNC Symbol;Acc:26255]             | -1.09 | 6.2E-15 |
| MMP14     | ENSG00000157227 | matrix metalloproteinase 14 (membrane-inserted) [Source:HGNC Symbol;Acc:7160] | -1.78 | 6.3E-15 |
| PCDH1     | ENSG00000156453 | protocadherin 1 [Source:HGNC Symbol;Acc:8655]                                 | -1.44 | 6.5E-15 |
| RHOU      | ENSG00000116574 | ras homolog family member U [Source:HGNC Symbol;Acc:17794]                    | -1.40 | 6.6E-15 |
| WFDC12    | ENSG00000168703 | WAP four-disulfide core domain 12 [Source:HGNC Symbol;Acc:16115]              | -2.11 | 7.3E-15 |
| LATS2     | ENSG00000150457 | large tumor suppressor kinase 2 [Source:HGNC Symbol;Acc:6515]                 | -1.44 | 7.6E-15 |
| --        | ENSG00000227053 | --                                                                            | -2.19 | 7.8E-15 |
| DEFB1     | ENSG00000164825 | defensin, beta 1 [Source:HGNC Symbol;Acc:2766]                                | -1.59 | 9.3E-15 |
| KCMF1     | ENSG00000176407 | potassium channel modulatory factor 1 [Source:HGNC Symbol;Acc:20589]          | -0.97 | 9.4E-15 |
| EPN2      | ENSG00000072134 | epsin 2 [Source:HGNC Symbol;Acc:18639]                                        | -0.88 | 1.0E-14 |

|          |                 |                                                                                                                    |       |         |
|----------|-----------------|--------------------------------------------------------------------------------------------------------------------|-------|---------|
| CLTB     | ENSG00000175416 | clathrin, light chain B [Source:HGNC Symbol;Acc:2091]                                                              | -1.69 | 1.0E-14 |
| TMEM50B  | ENSG00000142188 | transmembrane protein 50B [Source:HGNC Symbol;Acc:1280]                                                            | -0.97 | 1.0E-14 |
| RBMS2    | ENSG00000076067 | RNA binding motif, single stranded interacting protein 2 [Source:HGNC Symbol;Acc:9909]                             | -1.50 | 1.1E-14 |
| SESTD1   | ENSG00000187231 | SEC14 and spectrin domains 1 [Source:HGNC Symbol;Acc:18379]                                                        | -1.56 | 1.1E-14 |
| SLC7A9   | ENSG00000021488 | solute carrier family 7 (amino acid transporter light chain, bo,+ system), member 9 [Source:HGNC Symbol;Acc:11067] | -1.79 | 1.1E-14 |
| SERPINB9 | ENSG00000170542 | serpin peptidase inhibitor, clade B (ovalbumin), member 9 [Source:HGNC Symbol;Acc:8955]                            | -1.20 | 1.1E-14 |
| EPHA2    | ENSG00000142627 | EPH receptor A2 [Source:HGNC Symbol;Acc:3386]                                                                      | -1.88 | 1.1E-14 |
| RREB1    | ENSG00000124782 | ras responsive element binding protein 1 [Source:HGNC Symbol;Acc:10449]                                            | -0.95 | 1.2E-14 |
| SLC51B   | ENSG00000186198 | solute carrier family 51, beta subunit [Source:HGNC Symbol;Acc:29956]                                              | -1.77 | 1.2E-14 |
| CACNA1C  | ENSG00000151067 | calcium channel, voltage-dependent, L type, alpha 1C subunit [Source:HGNC Symbol;Acc:1390]                         | -1.63 | 1.2E-14 |
| SMAD7    | ENSG00000101665 | SMAD family member 7 [Source:HGNC Symbol;Acc:6773]                                                                 | -1.28 | 1.2E-14 |
| RNASEL   | ENSG00000135828 | ribonuclease L (2',5'-oligoadenylate synthetase-dependent) [Source:HGNC Symbol;Acc:10050]                          | -1.30 | 1.3E-14 |
| P4HA2    | ENSG00000072682 | prolyl 4-hydroxylase, alpha polypeptide II [Source:HGNC Symbol;Acc:8547]                                           | -0.98 | 1.4E-14 |
| PLEKHG2  | ENSG00000090924 | pleckstrin homology domain containing, family G (with RhoGef domain) member 2 [Source:HGNC Symbol;Acc:29515]       | -1.54 | 1.5E-14 |
| TMEM106A | ENSG00000184988 | transmembrane protein 106A [Source:HGNC Symbol;Acc:28288]                                                          | -1.54 | 1.6E-14 |
| TPM4     | ENSG00000167460 | tropomyosin 4 [Source:HGNC Symbol;Acc:12013]                                                                       | -1.22 | 1.6E-14 |
| INPP1    | ENSG00000151689 | inositol polyphosphate-1-phosphatase [Source:HGNC Symbol;Acc:6071]                                                 | -0.89 | 1.6E-14 |
| PROM2    | ENSG00000155066 | prominin 2 [Source:HGNC Symbol;Acc:20685]                                                                          | -1.28 | 1.6E-14 |
| --       | ENSG00000263766 | --                                                                                                                 | -1.06 | 1.7E-14 |

|          |                 |                                                                                                        |       |         |
|----------|-----------------|--------------------------------------------------------------------------------------------------------|-------|---------|
| PPP2CB   | ENSG00000104695 | protein phosphatase 2, catalytic subunit, beta isozyme [Source:HGNC Symbol;Acc:9300]                   | -1.34 | 1.7E-14 |
| TIPARP   | ENSG00000163659 | TCDD-inducible poly(ADP-ribose) polymerase [Source:HGNC Symbol;Acc:23696]                              | -1.49 | 1.8E-14 |
| B2M      | ENSG00000166710 | beta-2-microglobulin [Source:HGNC Symbol;Acc:914]                                                      | -1.44 | 2.0E-14 |
| CTNNA1   | ENSG00000044115 | catenin (cadherin-associated protein), alpha 1, 102kDa [Source:HGNC Symbol;Acc:2509]                   | -1.01 | 2.0E-14 |
| WWC1     | ENSG00000113645 | WW and C2 domain containing 1 [Source:HGNC Symbol;Acc:29435]                                           | -1.06 | 2.2E-14 |
| EHBP1L1  | ENSG00000173442 | EH domain binding protein 1-like 1 [Source:HGNC Symbol;Acc:30682]                                      | -1.52 | 2.2E-14 |
| DNM2     | ENSG00000079805 | dynamin 2 [Source:HGNC Symbol;Acc:2974]                                                                | -1.29 | 2.2E-14 |
| SLC20A1  | ENSG00000144136 | solute carrier family 20 (phosphate transporter), member 1 [Source:HGNC Symbol;Acc:10946]              | -1.15 | 2.2E-14 |
| ELF3     | ENSG00000163435 | E74-like factor 3 (ets domain transcription factor, epithelial-specific) [Source:HGNC Symbol;Acc:3318] | -1.25 | 2.3E-14 |
| MTHFR    | ENSG00000177000 | methylenetetrahydrofolate reductase (NAD(P)H) [Source:HGNC Symbol;Acc:7436]                            | -1.44 | 2.3E-14 |
| AIM1L    | ENSG00000176092 | absent in melanoma 1-like [Source:HGNC Symbol;Acc:17295]                                               | -1.78 | 2.6E-14 |
| OXSRI    | ENSG00000172939 | oxidative stress responsive 1 [Source:HGNC Symbol;Acc:8508]                                            | -1.02 | 2.6E-14 |
| KLK8     | ENSG00000129455 | kallikrein-related peptidase 8 [Source:HGNC Symbol;Acc:6369]                                           | -1.73 | 2.6E-14 |
| C12orf36 | ENSG00000180861 | chromosome 12 open reading frame 36 [Source:HGNC Symbol;Acc:26598]                                     | -1.37 | 2.7E-14 |
| BARX2    | ENSG00000043039 | BARX homeobox 2 [Source:HGNC Symbol;Acc:956]                                                           | -1.02 | 2.8E-14 |
| EHD4     | ENSG00000103966 | EH-domain containing 4 [Source:HGNC Symbol;Acc:3245]                                                   | -1.06 | 2.9E-14 |
| KIAA1161 | ENSG00000164976 | KIAA1161 [Source:HGNC Symbol;Acc:19918]                                                                | -1.21 | 3.0E-14 |
| GRAMD3   | ENSG00000155324 | GRAM domain containing 3 [Source:HGNC Symbol;Acc:24911]                                                | -1.26 | 3.1E-14 |
| MPPE1    | ENSG00000154889 | metallophosphoesterase 1 [Source:HGNC Symbol;Acc:15988]                                                | -1.05 | 3.2E-14 |
| MIR31HG  | ENSG00000171889 | MIR31 host gene (non-protein coding) [Source:HGNC Symbol;Acc:37187]                                    | -1.73 | 3.2E-14 |
| TEP1     | ENSG00000129566 | telomerase-associated protein 1 [Source:HGNC Symbol;Acc:11726]                                         | -0.93 | 3.3E-14 |

|          |                 |                                                                                                     |       |         |
|----------|-----------------|-----------------------------------------------------------------------------------------------------|-------|---------|
| KIAA1522 | ENSG00000162522 | KIAA1522 [Source:HGNC Symbol;Acc:29301]                                                             | -1.11 | 3.3E-14 |
| MTMR3    | ENSG00000100330 | myotubularin related protein 3 [Source:HGNC Symbol;Acc:7451]                                        | -1.10 | 3.4E-14 |
| TMEM164  | ENSG00000157600 | transmembrane protein 164 [Source:HGNC Symbol;Acc:26217]                                            | -1.05 | 3.5E-14 |
| DST      | ENSG00000151914 | dystonin [Source:HGNC Symbol;Acc:1090]                                                              | -1.54 | 3.5E-14 |
| PLCXD1   | ENSG00000182378 | phosphatidylinositol-specific phospholipase C, X domain containing 1 [Source:HGNC Symbol;Acc:23148] | -1.49 | 3.5E-14 |
| RRAS     | ENSG00000126458 | related RAS viral (r-ras) oncogene homolog [Source:HGNC Symbol;Acc:10447]                           | -1.62 | 3.7E-14 |
| STAP2    | ENSG00000178078 | signal transducing adaptor family member 2 [Source:HGNC Symbol;Acc:30430]                           | -1.28 | 3.8E-14 |
| ITPKC    | ENSG00000086544 | inositol-trisphosphate 3-kinase C [Source:HGNC Symbol;Acc:14897]                                    | -1.63 | 3.8E-14 |
| PLEC     | ENSG00000178209 | plectin [Source:HGNC Symbol;Acc:9069]                                                               | -2.05 | 4.1E-14 |
| PLXNB2   | ENSG00000196576 | plexin B2 [Source:HGNC Symbol;Acc:9104]                                                             | -1.44 | 4.1E-14 |
| ARL8A    | ENSG00000143862 | ADP-ribosylation factor-like 8A [Source:HGNC Symbol;Acc:25192]                                      | -1.21 | 4.4E-14 |
| TPM1     | ENSG00000140416 | tropomyosin 1 (alpha) [Source:HGNC Symbol;Acc:12010]                                                | -1.17 | 4.5E-14 |
| UPK2     | ENSG00000110375 | uroplakin 2 [Source:HGNC Symbol;Acc:12579]                                                          | -1.91 | 4.5E-14 |
| B4GALT4  | ENSG00000121578 | UDP-Gal:betaGlcNAc beta 1,4- galactosyltransferase, polypeptide 4 [Source:HGNC Symbol;Acc:927]      | -1.07 | 4.6E-14 |
| SAT1     | ENSG00000130066 | spermidine/spermine N1-acetyltransferase 1 [Source:HGNC Symbol;Acc:10540]                           | -1.12 | 4.6E-14 |
| CDC42BPA | ENSG00000143776 | CDC42 binding protein kinase alpha (DMPK-like) [Source:HGNC Symbol;Acc:1737]                        | -1.18 | 4.8E-14 |
| RIOK3    | ENSG00000101782 | RIO kinase 3 [Source:HGNC Symbol;Acc:11451]                                                         | -1.59 | 5.1E-14 |
| TMEM171  | ENSG00000157111 | transmembrane protein 171 [Source:HGNC Symbol;Acc:27031]                                            | -1.24 | 5.1E-14 |
| ANKLE2   | ENSG00000176915 | ankyrin repeat and LEM domain containing 2 [Source:HGNC Symbol;Acc:29101]                           | -0.99 | 5.2E-14 |
| NAALADL1 | ENSG00000168060 | N-acetylated alpha-linked acidic dipeptidase-like 1 [Source:HGNC Symbol;Acc:23536]                  | -1.71 | 5.3E-14 |
| --       | ENSG00000230234 | --                                                                                                  | -1.40 | 5.5E-14 |

|            |                 |                                                                                                                                                 |       |         |
|------------|-----------------|-------------------------------------------------------------------------------------------------------------------------------------------------|-------|---------|
| RNF24      | ENSG00000101236 | ring finger protein 24 [Source:HGNC Symbol;Acc:13779]                                                                                           | -1.02 | 5.5E-14 |
| --         | ENSG00000258689 | --                                                                                                                                              | -2.07 | 5.6E-14 |
| BCL10      | ENSG00000142867 | B-cell CLL/lymphoma 10 [Source:HGNC Symbol;Acc:989]                                                                                             | -1.37 | 5.7E-14 |
| RHBDF1     | ENSG00000007384 | rhomboid 5 homolog 1 (Drosophila) [Source:HGNC Symbol;Acc:20561]                                                                                | -1.49 | 5.7E-14 |
| FOXO3      | ENSG00000118689 | forkhead box O3 [Source:HGNC Symbol;Acc:3821]                                                                                                   | -1.11 | 5.8E-14 |
| CAPZB      | ENSG00000077549 | capping protein (actin filament) muscle Z-line, beta [Source:HGNC Symbol;Acc:1491]                                                              | -0.75 | 5.8E-14 |
| PTPN21     | ENSG00000070778 | protein tyrosine phosphatase, non-receptor type 21 [Source:HGNC Symbol;Acc:9651]                                                                | -1.20 | 5.9E-14 |
| ITGB4      | ENSG00000132470 | integrin, beta 4 [Source:HGNC Symbol;Acc:6158]                                                                                                  | -1.51 | 6.0E-14 |
| EPAS1      | ENSG00000116016 | endothelial PAS domain protein 1 [Source:HGNC Symbol;Acc:3374]                                                                                  | -1.21 | 6.7E-14 |
| SH3BGR3    | ENSG00000142669 | SH3 domain binding glutamic acid-rich protein like 3 [Source:HGNC Symbol;Acc:15568]                                                             | -1.55 | 7.2E-14 |
| ITSN1      | ENSG00000205726 | intersectin 1 (SH3 domain protein) [Source:HGNC Symbol;Acc:6183]                                                                                | -1.09 | 7.3E-14 |
| MAPK7      | ENSG00000166484 | mitogen-activated protein kinase 7 [Source:HGNC Symbol;Acc:6880]                                                                                | -1.63 | 7.3E-14 |
| BTN2A1     | ENSG00000112763 | butyrophilin, subfamily 2, member A1 [Source:HGNC Symbol;Acc:1136]                                                                              | -1.04 | 7.5E-14 |
| ACVRL1     | ENSG00000139567 | activin A receptor type II-like 1 [Source:HGNC Symbol;Acc:175]                                                                                  | -1.23 | 7.5E-14 |
| SNX33      | ENSG00000173548 | sorting nexin 33 [Source:HGNC Symbol;Acc:28468]                                                                                                 | -1.11 | 7.8E-14 |
| TMCO4      | ENSG00000162542 | transmembrane and coiled-coil domains 4 [Source:HGNC Symbol;Acc:27393]                                                                          | -1.42 | 8.0E-14 |
| EGFR       | ENSG00000146648 | epidermal growth factor receptor [Source:HGNC Symbol;Acc:3236]                                                                                  | -1.25 | 8.1E-14 |
| CCDC92     | ENSG00000119242 | coiled-coil domain containing 92 [Source:HGNC Symbol;Acc:29563]                                                                                 | -1.22 | 9.2E-14 |
| SEMA4B     | ENSG00000185033 | sema domain, immunoglobulin domain (Ig), transmembrane domain (TM) and short cytoplasmic domain, (semaphorin) 4B [Source:HGNC Symbol;Acc:10730] | -1.50 | 9.2E-14 |
| IL10RB-AS1 | ENSG00000223799 | IL10RB antisense RNA 1 (head to head) [Source:HGNC Symbol;Acc:44303]                                                                            | -1.10 | 9.6E-14 |



|          |                 |                                                                                                                   |       |         |
|----------|-----------------|-------------------------------------------------------------------------------------------------------------------|-------|---------|
| BCL3     | ENSG00000069399 | B-cell CLL/lymphoma 3 [Source:HGNC Symbol;Acc:998]                                                                | -1.78 | 9.6E-14 |
| FURIN    | ENSG00000140564 | furin (paired basic amino acid cleaving enzyme) [Source:HGNC Symbol;Acc:8568]                                     | -1.33 | 9.8E-14 |
| TMEM150B | ENSG00000180061 | transmembrane protein 150B [Source:HGNC Symbol;Acc:34415]                                                         | -1.72 | 9.8E-14 |
| GCKR     | ENSG00000084734 | glucokinase (hexokinase 4) regulator [Source:HGNC Symbol;Acc:4196]                                                | -1.93 | 1.0E-13 |
| RHOG     | ENSG00000177105 | ras homolog family member G [Source:HGNC Symbol;Acc:672]                                                          | -1.49 | 1.1E-13 |
| ARHGEF5  | ENSG00000050327 | Rho guanine nucleotide exchange factor (GEF) 5 [Source:HGNC Symbol;Acc:13209]                                     | -1.26 | 1.1E-13 |
| TRIM69   | ENSG00000185880 | tripartite motif containing 69 [Source:HGNC Symbol;Acc:17857]                                                     | -1.23 | 1.1E-13 |
| GJB5     | ENSG00000189280 | gap junction protein, beta 5, 31.1kDa [Source:HGNC Symbol;Acc:4287]                                               | -1.11 | 1.1E-13 |
| TNKS1BP1 | ENSG00000149115 | tankyrase 1 binding protein 1, 182kDa [Source:HGNC Symbol;Acc:19081]                                              | -1.27 | 1.2E-13 |
| TYMP     | ENSG00000025708 | thymidine phosphorylase [Source:HGNC Symbol;Acc:3148]                                                             | -1.91 | 1.2E-13 |
| ACTN4    | ENSG00000130402 | actinin, alpha 4 [Source:HGNC Symbol;Acc:166]                                                                     | -1.17 | 1.2E-13 |
| NFKBIZ   | ENSG00000144802 | nuclear factor of kappa light polypeptide gene enhancer in B-cells inhibitor, zeta [Source:HGNC Symbol;Acc:29805] | -1.47 | 1.2E-13 |
| TBX3     | ENSG00000135111 | T-box 3 [Source:HGNC Symbol;Acc:11602]                                                                            | -1.46 | 1.3E-13 |
| TICAM1   | ENSG00000127666 | toll-like receptor adaptor molecule 1 [Source:HGNC Symbol;Acc:18348]                                              | -1.82 | 1.3E-13 |
| FLII     | ENSG00000177731 | flightless I homolog (Drosophila) [Source:HGNC Symbol;Acc:3750]                                                   | -1.20 | 1.3E-13 |
| RASA4CP  | ENSG00000228903 | RAS p21 protein activator 4C, pseudogene [Source:HGNC Symbol;Acc:44185]                                           | -1.43 | 1.3E-13 |
| ALPI     | ENSG00000163295 | alkaline phosphatase, intestinal [Source:HGNC Symbol;Acc:437]                                                     | -1.90 | 1.3E-13 |
| --       | ENSG00000268906 | --                                                                                                                | -2.15 | 1.5E-13 |
| PRSS8    | ENSG00000052344 | protease, serine, 8 [Source:HGNC Symbol;Acc:9491]                                                                 | -1.58 | 1.5E-13 |
| SQRDL    | ENSG00000137767 | sulfide quinone reductase-like (yeast) [Source:HGNC Symbol;Acc:20390]                                             | -0.81 | 1.5E-13 |

|          |                 |                                                                                         |       |         |
|----------|-----------------|-----------------------------------------------------------------------------------------|-------|---------|
| CAP1     | ENSG00000131236 | CAP, adenylate cyclase-associated protein 1 (yeast) [Source:HGNC Symbol;Acc:20040]      | -1.28 | 1.5E-13 |
| IL4R     | ENSG00000077238 | interleukin 4 receptor [Source:HGNC Symbol;Acc:6015]                                    | -1.34 | 1.5E-13 |
| USP18    | ENSG00000184979 | ubiquitin specific peptidase 18 [Source:HGNC Symbol;Acc:12616]                          | -1.24 | 1.6E-13 |
| CHMP4B   | ENSG00000101421 | charged multivesicular body protein 4B [Source:HGNC Symbol;Acc:16171]                   | -0.90 | 1.7E-13 |
| SLC44A2  | ENSG00000129353 | solute carrier family 44 (choline transporter), member 2 [Source:HGNC Symbol;Acc:17292] | -1.02 | 1.8E-13 |
| C1orf177 | ENSG00000162398 | chromosome 1 open reading frame 177 [Source:HGNC Symbol;Acc:26854]                      | -2.63 | 1.9E-13 |
| KIFC3    | ENSG00000140859 | kinesin family member C3 [Source:HGNC Symbol;Acc:6326]                                  | -1.81 | 2.0E-13 |
| CACNB3   | ENSG00000167535 | calcium channel, voltage-dependent, beta 3 subunit [Source:HGNC Symbol;Acc:1403]        | -1.28 | 2.0E-13 |
| EPCAM    | ENSG00000119888 | epithelial cell adhesion molecule [Source:HGNC Symbol;Acc:11529]                        | -1.20 | 2.0E-13 |
| ADM      | ENSG00000148926 | adrenomedullin [Source:HGNC Symbol;Acc:259]                                             | -1.66 | 2.1E-13 |
| SSPN     | ENSG00000123096 | sarcospan [Source:HGNC Symbol;Acc:11322]                                                | -1.81 | 2.2E-13 |
| RAPGEF2  | ENSG00000109756 | Rap guanine nucleotide exchange factor (GEF) 2 [Source:HGNC Symbol;Acc:16854]           | -1.25 | 2.3E-13 |
| NR5A2    | ENSG00000116833 | nuclear receptor subfamily 5, group A, member 2 [Source:HGNC Symbol;Acc:7984]           | -1.50 | 2.3E-13 |
| GJB3     | ENSG00000188910 | gap junction protein, beta 3, 31kDa [Source:HGNC Symbol;Acc:4285]                       | -1.35 | 2.3E-13 |
| CES2     | ENSG00000172831 | carboxylesterase 2 [Source:HGNC Symbol;Acc:1864]                                        | -1.10 | 2.4E-13 |
| CDRT1    | ENSG00000241322 | CMT1A duplicated region transcript 1 [Source:HGNC Symbol;Acc:14379]                     | -1.98 | 2.4E-13 |
| CTSS     | ENSG00000163131 | cathepsin S [Source:HGNC Symbol;Acc:2545]                                               | -1.13 | 2.4E-13 |
| MPRIIP   | ENSG00000133030 | myosin phosphatase Rho interacting protein [Source:HGNC Symbol;Acc:30321]               | -1.37 | 2.5E-13 |
| TTC7A    | ENSG00000068724 | tetratricopeptide repeat domain 7A [Source:HGNC Symbol;Acc:19750]                       | -1.19 | 2.5E-13 |

|         |                 |                                                                                                    |       |         |
|---------|-----------------|----------------------------------------------------------------------------------------------------|-------|---------|
| FGFBP1  | ENSG00000137440 | fibroblast growth factor binding protein 1 [Source:HGNC Symbol;Acc:19695]                          | -1.59 | 2.5E-13 |
| XKR9    | ENSG00000221947 | XK, Kell blood group complex subunit-related family, member 9 [Source:HGNC Symbol;Acc:20937]       | -1.79 | 2.5E-13 |
| PICALM  | ENSG00000073921 | phosphatidylinositol binding clathrin assembly protein [Source:HGNC Symbol;Acc:15514]              | -1.29 | 2.6E-13 |
| ZDHHC13 | ENSG00000177054 | zinc finger, DHHC-type containing 13 [Source:HGNC Symbol;Acc:18413]                                | -1.25 | 2.7E-13 |
| ST8SIA6 | ENSG00000148488 | ST8 alpha-N-acetyl-neuraminide alpha-2,8-sialyltransferase 6 [Source:HGNC Symbol;Acc:23317]        | -1.60 | 2.8E-13 |
| EHD1    | ENSG00000110047 | EH-domain containing 1 [Source:HGNC Symbol;Acc:3242]                                               | -1.57 | 2.8E-13 |
| ADM2    | ENSG00000128165 | adrenomedullin 2 [Source:HGNC Symbol;Acc:28898]                                                    | -1.82 | 3.0E-13 |
| RNF152  | ENSG00000176641 | ring finger protein 152 [Source:HGNC Symbol;Acc:26811]                                             | -3.23 | 3.0E-13 |
| PDLIM2  | ENSG00000120913 | PDZ and LIM domain 2 (mystique) [Source:HGNC Symbol;Acc:13992]                                     | -1.61 | 3.0E-13 |
| TFE3    | ENSG00000068323 | transcription factor binding to IGHM enhancer 3 [Source:HGNC Symbol;Acc:11752]                     | -1.18 | 3.1E-13 |
| SPATS2L | ENSG00000196141 | spermatogenesis associated, serine-rich 2-like [Source:HGNC Symbol;Acc:24574]                      | -1.02 | 3.1E-13 |
| IST1    | ENSG00000182149 | increased sodium tolerance 1 homolog (yeast) [Source:HGNC Symbol;Acc:28977]                        | -0.77 | 3.1E-13 |
| CPNE2   | ENSG00000140848 | copine II [Source:HGNC Symbol;Acc:2315]                                                            | -0.96 | 3.2E-13 |
| TMSB4X  | ENSG00000205542 | thymosin beta 4, X-linked [Source:HGNC Symbol;Acc:11881]                                           | -0.99 | 3.2E-13 |
| SULT1A2 | ENSG00000197165 | sulfotransferase family, cytosolic, 1A, phenol-preferring, member 2 [Source:HGNC Symbol;Acc:11454] | -1.74 | 3.2E-13 |
| PVRL2   | ENSG00000130202 | poliovirus receptor-related 2 (herpesvirus entry mediator B) [Source:HGNC Symbol;Acc:9707]         | -1.33 | 3.3E-13 |
| CXorf38 | ENSG00000185753 | chromosome X open reading frame 38 [Source:HGNC Symbol;Acc:28589]                                  | -1.12 | 3.3E-13 |
| HNF4A   | ENSG00000101076 | hepatocyte nuclear factor 4, alpha [Source:HGNC Symbol;Acc:5024]                                   | -0.88 | 3.6E-13 |

|          |                 |                                                                                                                             |       |         |
|----------|-----------------|-----------------------------------------------------------------------------------------------------------------------------|-------|---------|
| COL6A1   | ENSG00000142156 | collagen, type VI, alpha 1 [Source:HGNC Symbol;Acc:2211]                                                                    | -1.57 | 3.7E-13 |
| PLCD3    | ENSG00000161714 | phospholipase C, delta 3 [Source:HGNC Symbol;Acc:9061]                                                                      | -1.37 | 3.9E-13 |
| EFNA1    | ENSG00000169242 | ephrin-A1 [Source:HGNC Symbol;Acc:3221]                                                                                     | -1.35 | 4.1E-13 |
| RHOD     | ENSG00000173156 | ras homolog family member D [Source:HGNC Symbol;Acc:670]                                                                    | -1.86 | 4.3E-13 |
| S100A6   | ENSG00000197956 | S100 calcium binding protein A6 [Source:HGNC Symbol;Acc:10496]                                                              | -1.27 | 4.4E-13 |
| TMEM63B  | ENSG00000137216 | transmembrane protein 63B [Source:HGNC Symbol;Acc:17735]                                                                    | -1.27 | 4.5E-13 |
| DIRC2    | ENSG00000138463 | disrupted in renal carcinoma 2 [Source:HGNC Symbol;Acc:16628]                                                               | -1.25 | 4.8E-13 |
| MMP15    | ENSG00000102996 | matrix metalloproteinase 15 (membrane-inserted) [Source:HGNC Symbol;Acc:7161]                                               | -1.49 | 4.9E-13 |
| B3GAT2   | ENSG00000112309 | beta-1,3-glucuronyltransferase 2 (glucuronosyltransferase S) [Source:HGNC Symbol;Acc:922]                                   | -1.03 | 5.0E-13 |
| DOCK5    | ENSG00000147459 | dedicator of cytokinesis 5 [Source:HGNC Symbol;Acc:23476]                                                                   | -1.25 | 5.1E-13 |
| EXOC6B   | ENSG00000144036 | exocyst complex component 6B [Source:HGNC Symbol;Acc:17085]                                                                 | -1.37 | 5.2E-13 |
| C10orf10 | ENSG00000165507 | chromosome 10 open reading frame 10 [Source:HGNC Symbol;Acc:23355]                                                          | -1.52 | 5.2E-13 |
| --       | ENSG00000269295 | Tight junction protein 2 (Zona occludens 2) isoform 1 variant; Uncharacterized protein [Source:UniProtKB/TrEMBL;Acc:Q59F31] | -0.88 | 5.7E-13 |
| ABCG2    | ENSG00000118777 | ATP-binding cassette, sub-family G (WHITE), member 2 [Source:HGNC Symbol;Acc:74]                                            | -1.94 | 5.8E-13 |
| --       | ENSG00000262112 | --                                                                                                                          | -1.40 | 5.8E-13 |
| CBLC     | ENSG00000142273 | Cbl proto-oncogene C, E3 ubiquitin protein ligase [Source:HGNC Symbol;Acc:15961]                                            | -1.44 | 6.0E-13 |
| ABCB11   | ENSG00000073734 | ATP-binding cassette, sub-family B (MDR/TAP), member 11 [Source:HGNC Symbol;Acc:42]                                         | -2.11 | 6.1E-13 |
| SMPDL3A  | ENSG00000172594 | sphingomyelin phosphodiesterase, acid-like 3A [Source:HGNC Symbol;Acc:17389]                                                | -1.97 | 6.6E-13 |
| GPT      | ENSG00000167701 | glutamic-pyruvate transaminase (alanine aminotransferase) [Source:HGNC Symbol;Acc:4552]                                     | -2.19 | 6.8E-13 |

|         |                 |                                                                                                           |       |         |
|---------|-----------------|-----------------------------------------------------------------------------------------------------------|-------|---------|
| RALGPS2 | ENSG00000116191 | Ral GEF with PH domain and SH3 binding motif 2 [Source:HGNC Symbol;Acc:30279]                             | -1.38 | 7.1E-13 |
| ARFGAP3 | ENSG00000242247 | ADP-ribosylation factor GTPase activating protein 3 [Source:HGNC Symbol;Acc:661]                          | -1.17 | 7.4E-13 |
| WDR1    | ENSG00000071127 | WD repeat domain 1 [Source:HGNC Symbol;Acc:12754]                                                         | -1.01 | 7.4E-13 |
| CALB1   | ENSG00000104327 | calbindin 1, 28kDa [Source:HGNC Symbol;Acc:1434]                                                          | -1.33 | 7.5E-13 |
| MICAL1  | ENSG00000135596 | microtubule associated monooxygenase, calponin and LIM domain containing 1 [Source:HGNC Symbol;Acc:20619] | -1.50 | 7.7E-13 |
| BDKRB2  | ENSG00000168398 | bradykinin receptor B2 [Source:HGNC Symbol;Acc:1030]                                                      | -1.47 | 8.0E-13 |
| EXOC3L4 | ENSG00000205436 | exocyst complex component 3-like 4 [Source:HGNC Symbol;Acc:20120]                                         | -1.82 | 8.1E-13 |
| PCED1B  | ENSG00000179715 | PC-esterase domain containing 1B [Source:HGNC Symbol;Acc:28255]                                           | -1.34 | 8.3E-13 |
| DUSP6   | ENSG00000139318 | dual specificity phosphatase 6 [Source:HGNC Symbol;Acc:3072]                                              | -1.13 | 8.3E-13 |
| CXCL3   | ENSG00000163734 | chemokine (C-X-C motif) ligand 3 [Source:HGNC Symbol;Acc:4604]                                            | -1.27 | 8.4E-13 |
| TM6SF2  | ENSG00000213996 | transmembrane 6 superfamily member 2 [Source:HGNC Symbol;Acc:11861]                                       | -2.95 | 8.5E-13 |
| NR3C2   | ENSG00000151623 | nuclear receptor subfamily 3, group C, member 2 [Source:HGNC Symbol;Acc:7979]                             | -1.68 | 9.6E-13 |
| KCTD21  | ENSG00000188997 | potassium channel tetramerization domain containing 21 [Source:HGNC Symbol;Acc:27452]                     | -1.09 | 9.6E-13 |
| VTCN1   | ENSG00000134258 | V-set domain containing T cell activation inhibitor 1 [Source:HGNC Symbol;Acc:28873]                      | -1.27 | 9.9E-13 |
| RAB25   | ENSG00000132698 | RAB25, member RAS oncogene family [Source:HGNC Symbol;Acc:18238]                                          | -0.95 | 1.0E-12 |
| ZDHHC5  | ENSG00000156599 | zinc finger, DHHC-type containing 5 [Source:HGNC Symbol;Acc:18472]                                        | -0.82 | 1.0E-12 |
| ABCC3   | ENSG00000108846 | ATP-binding cassette, sub-family C (CFTR/MRP), member 3 [Source:HGNC Symbol;Acc:54]                       | -1.00 | 1.0E-12 |

|          |                 |                                                                                                              |       |         |
|----------|-----------------|--------------------------------------------------------------------------------------------------------------|-------|---------|
| CYSTM1   | ENSG00000120306 | cysteine-rich transmembrane module containing 1 [Source:HGNC Symbol;Acc:30239]                               | -1.10 | 1.0E-12 |
| CYTH2    | ENSG00000105443 | cytohesin 2 [Source:HGNC Symbol;Acc:9502]                                                                    | -1.28 | 1.1E-12 |
| C17orf67 | ENSG00000214226 | chromosome 17 open reading frame 67 [Source:HGNC Symbol;Acc:27900]                                           | -1.67 | 1.1E-12 |
| CHFR     | ENSG00000072609 | checkpoint with forkhead and ring finger domains, E3 ubiquitin protein ligase [Source:HGNC Symbol;Acc:20455] | -1.06 | 1.1E-12 |
| --       | ENSG00000261465 | --                                                                                                           | -1.28 | 1.1E-12 |
| --       | ENSG00000236039 | --                                                                                                           | -1.70 | 1.1E-12 |
| C3       | ENSG00000125730 | complement component 3 [Source:HGNC Symbol;Acc:1318]                                                         | -1.44 | 1.1E-12 |
| ARSA     | ENSG00000100299 | arylsulfatase A [Source:HGNC Symbol;Acc:713]                                                                 | -1.46 | 1.1E-12 |
| GDI1     | ENSG00000203879 | GDP dissociation inhibitor 1 [Source:HGNC Symbol;Acc:4226]                                                   | -1.20 | 1.1E-12 |
| FRMD3    | ENSG00000172159 | FERM domain containing 3 [Source:HGNC Symbol;Acc:24125]                                                      | -1.99 | 1.1E-12 |
| NDRG4    | ENSG00000103034 | NDRG family member 4 [Source:HGNC Symbol;Acc:14466]                                                          | -1.53 | 1.1E-12 |
| MIER3    | ENSG00000155545 | mesoderm induction early response 1, family member 3 [Source:HGNC Symbol;Acc:26678]                          | -1.50 | 1.3E-12 |
| CYP4F12  | ENSG00000186204 | cytochrome P450, family 4, subfamily F, polypeptide 12 [Source:HGNC Symbol;Acc:18857]                        | -1.62 | 1.3E-12 |
| RRBP1    | ENSG00000125844 | ribosome binding protein 1 [Source:HGNC Symbol;Acc:10448]                                                    | -1.14 | 1.3E-12 |
| CXCL2    | ENSG00000081041 | chemokine (C-X-C motif) ligand 2 [Source:HGNC Symbol;Acc:4603]                                               | -1.42 | 1.4E-12 |
| SYT7     | ENSG00000011347 | synaptotagmin VII [Source:HGNC Symbol;Acc:11514]                                                             | -1.10 | 1.5E-12 |
| NMRK1    | ENSG00000106733 | nicotinamide riboside kinase 1 [Source:HGNC Symbol;Acc:26057]                                                | -1.07 | 1.5E-12 |
| F3       | ENSG00000117525 | coagulation factor III (thromboplastin, tissue factor) [Source:HGNC Symbol;Acc:3541]                         | -1.36 | 1.5E-12 |
| RNF19A   | ENSG00000034677 | ring finger protein 19A, RBR E3 ubiquitin protein ligase [Source:HGNC Symbol;Acc:13432]                      | -1.16 | 1.6E-12 |
| --       | ENSG00000242687 | --                                                                                                           | -1.34 | 1.6E-12 |
| --       | ENSG00000260877 | --                                                                                                           | -1.58 | 1.7E-12 |

|           |                 |                                                                                                           |       |         |
|-----------|-----------------|-----------------------------------------------------------------------------------------------------------|-------|---------|
| BATF2     | ENSG00000168062 | basic leucine zipper transcription factor, ATF-like 2 [Source:HGNC Symbol;Acc:25163]                      | -1.20 | 1.7E-12 |
| CFLAR-AS1 | ENSG00000226312 | CFLAR antisense RNA 1 [Source:HGNC Symbol;Acc:14437]                                                      | -1.43 | 1.8E-12 |
| CMAS      | ENSG00000111726 | cytidine monophosphate N-acetylneuraminic acid synthetase [Source:HGNC Symbol;Acc:18290]                  | -1.17 | 1.8E-12 |
| KCTD10    | ENSG00000110906 | potassium channel tetramerization domain containing 10 [Source:HGNC Symbol;Acc:23236]                     | -0.94 | 1.9E-12 |
| PLEKHM1   | ENSG00000225190 | pleckstrin homology domain containing, family M (with RUN domain) member 1 [Source:HGNC Symbol;Acc:29017] | -1.31 | 1.9E-12 |
| ANKRD13A  | ENSG00000076513 | ankyrin repeat domain 13A [Source:HGNC Symbol;Acc:21268]                                                  | -1.03 | 1.9E-12 |
| CLIC1     | ENSG00000213719 | chloride intracellular channel 1 [Source:HGNC Symbol;Acc:2062]                                            | -0.85 | 2.0E-12 |
| FGD6      | ENSG00000180263 | FYVE, RhoGEF and PH domain containing 6 [Source:HGNC Symbol;Acc:21740]                                    | -1.46 | 2.0E-12 |
| PITPNM1   | ENSG00000110697 | phosphatidylinositol transfer protein, membrane-associated 1 [Source:HGNC Symbol;Acc:9003]                | -1.57 | 2.0E-12 |
| CYP2B7P   | ENSG00000256612 | cytochrome P450, family 2, subfamily B, polypeptide 7, pseudogene [Source:HGNC Symbol;Acc:2616]           | -2.25 | 2.1E-12 |
| PDC       | ENSG00000116703 | phosducin [Source:HGNC Symbol;Acc:8759]                                                                   | -1.73 | 2.1E-12 |
| TP53BP2   | ENSG00000143514 | tumor protein p53 binding protein, 2 [Source:HGNC Symbol;Acc:12000]                                       | -0.84 | 2.1E-12 |
| C15orf48  | ENSG00000166920 | chromosome 15 open reading frame 48 [Source:HGNC Symbol;Acc:29898]                                        | -1.05 | 2.2E-12 |
| CORO1A    | ENSG00000102879 | coronin, actin binding protein, 1A [Source:HGNC Symbol;Acc:2252]                                          | -1.62 | 2.3E-12 |
| PIP4K2A   | ENSG00000150867 | phosphatidylinositol-5-phosphate 4-kinase, type II, alpha [Source:HGNC Symbol;Acc:8997]                   | -1.14 | 2.3E-12 |
| SIRPA     | ENSG00000198053 | signal-regulatory protein alpha [Source:HGNC Symbol;Acc:9662]                                             | -1.05 | 2.4E-12 |
| TMPRSS4   | ENSG00000137648 | transmembrane protease, serine 4 [Source:HGNC Symbol;Acc:11878]                                           | -0.98 | 2.5E-12 |
| --        | ENSG00000244383 | --                                                                                                        | -1.45 | 2.5E-12 |

|          |                 |                                                                                                                  |       |         |
|----------|-----------------|------------------------------------------------------------------------------------------------------------------|-------|---------|
| PNPLA1   | ENSG00000180316 | patatin-like phospholipase domain containing 1 [Source:HGNC Symbol;Acc:21246]                                    | -1.64 | 2.5E-12 |
| NFE2L1   | ENSG00000082641 | nuclear factor, erythroid 2-like 1 [Source:HGNC Symbol;Acc:7781]                                                 | -0.99 | 2.5E-12 |
| PLK3     | ENSG00000173846 | polo-like kinase 3 [Source:HGNC Symbol;Acc:2154]                                                                 | -1.66 | 2.8E-12 |
| ITGB6    | ENSG00000115221 | integrin, beta 6 [Source:HGNC Symbol;Acc:6161]                                                                   | -1.62 | 2.9E-12 |
| SLC9A1   | ENSG00000090020 | solute carrier family 9, subfamily A (NHE1, cation proton antiporter 1), member 1 [Source:HGNC Symbol;Acc:11071] | -1.30 | 2.9E-12 |
| B3GNT5   | ENSG00000176597 | UDP-GlcNAc:betaGal beta-1,3-N-acetylglucosaminyltransferase 5 [Source:HGNC Symbol;Acc:15684]                     | -1.44 | 3.1E-12 |
| VSIG2    | ENSG00000019102 | V-set and immunoglobulin domain containing 2 [Source:HGNC Symbol;Acc:17149]                                      | -1.32 | 3.1E-12 |
| VSIG1    | ENSG00000101842 | V-set and immunoglobulin domain containing 1 [Source:HGNC Symbol;Acc:28675]                                      | -2.11 | 3.2E-12 |
| FAM211B  | ENSG00000178026 | family with sequence similarity 211, member B [Source:HGNC Symbol;Acc:33155]                                     | -1.76 | 3.2E-12 |
| TNF      | ENSG00000232810 | tumor necrosis factor [Source:HGNC Symbol;Acc:11892]                                                             | -2.04 | 3.2E-12 |
| TFG      | ENSG00000114354 | TRK-fused gene [Source:HGNC Symbol;Acc:11758]                                                                    | -0.83 | 3.3E-12 |
| CAMK2G   | ENSG00000148660 | calcium/calmodulin-dependent protein kinase II gamma [Source:HGNC Symbol;Acc:1463]                               | -0.98 | 3.3E-12 |
| GPR115   | ENSG00000153294 | G protein-coupled receptor 115 [Source:HGNC Symbol;Acc:19011]                                                    | -1.46 | 3.5E-12 |
| CAMK2N1  | ENSG00000162545 | calcium/calmodulin-dependent protein kinase II inhibitor 1 [Source:HGNC Symbol;Acc:24190]                        | -1.32 | 3.6E-12 |
| SLC25A37 | ENSG00000147454 | solute carrier family 25 (mitochondrial iron transporter), member 37 [Source:HGNC Symbol;Acc:29786]              | -0.97 | 3.6E-12 |
| TRIB1    | ENSG00000173334 | tribbles pseudokinase 1 [Source:HGNC Symbol;Acc:16891]                                                           | -0.97 | 3.6E-12 |
| BTBD10   | ENSG00000148925 | BTB (POZ) domain containing 10 [Source:HGNC Symbol;Acc:21445]                                                    | -1.05 | 3.7E-12 |
| --       | ENSG00000265784 | --                                                                                                               | -1.08 | 3.8E-12 |
| CDC42EP2 | ENSG00000149798 | CDC42 effector protein (Rho GTPase binding) 2 [Source:HGNC Symbol;Acc:16263]                                     | -1.62 | 3.8E-12 |



|            |                 |                                                                                                        |       |         |
|------------|-----------------|--------------------------------------------------------------------------------------------------------|-------|---------|
| MYL6       | ENSG00000092841 | myosin, light chain 6, alkali, smooth muscle and non-muscle [Source:HGNC Symbol;Acc:7587]              | -0.90 | 3.9E-12 |
| PIK3C2B    | ENSG00000133056 | phosphatidylinositol-4-phosphate 3-kinase, catalytic subunit type 2 beta [Source:HGNC Symbol;Acc:8972] | -0.85 | 4.0E-12 |
| ARPC1A     | ENSG00000241685 | actin related protein 2/3 complex, subunit 1A, 41kDa [Source:HGNC Symbol;Acc:703]                      | -0.78 | 4.2E-12 |
| DUSP10     | ENSG00000143507 | dual specificity phosphatase 10 [Source:HGNC Symbol;Acc:3065]                                          | -1.12 | 4.3E-12 |
| BCL9L      | ENSG00000186174 | B-cell CLL/lymphoma 9-like [Source:HGNC Symbol;Acc:23688]                                              | -1.38 | 4.4E-12 |
| CARS       | ENSG00000110619 | cysteinyl-tRNA synthetase [Source:HGNC Symbol;Acc:1493]                                                | -0.82 | 4.4E-12 |
| IGSF3      | ENSG00000143061 | immunoglobulin superfamily, member 3 [Source:HGNC Symbol;Acc:5950]                                     | -1.06 | 4.4E-12 |
| ARHGAP17   | ENSG00000140750 | Rho GTPase activating protein 17 [Source:HGNC Symbol;Acc:18239]                                        | -1.31 | 4.4E-12 |
| BAIAP2L2   | ENSG00000128298 | BAI1-associated protein 2-like 2 [Source:HGNC Symbol;Acc:26203]                                        | -1.87 | 4.4E-12 |
| RASD2      | ENSG00000100302 | RASD family, member 2 [Source:HGNC Symbol;Acc:18229]                                                   | -2.00 | 4.5E-12 |
| NCSTN      | ENSG00000162736 | nicastrin [Source:HGNC Symbol;Acc:17091]                                                               | -0.84 | 4.6E-12 |
| RAP2C      | ENSG00000123728 | RAP2C, member of RAS oncogene family [Source:HGNC Symbol;Acc:21165]                                    | -1.40 | 4.8E-12 |
| AXDND1     | ENSG00000162779 | axonemal dynein light chain domain containing 1 [Source:HGNC Symbol;Acc:26564]                         | -1.35 | 5.2E-12 |
| KHNYN      | ENSG00000100441 | KH and NYN domain containing [Source:HGNC Symbol;Acc:20166]                                            | -0.81 | 5.2E-12 |
| CNKSR2     | ENSG00000149970 | connector enhancer of kinase suppressor of Ras 2 [Source:HGNC Symbol;Acc:19701]                        | -1.98 | 5.3E-12 |
| RAB3B      | ENSG00000169213 | RAB3B, member RAS oncogene family [Source:HGNC Symbol;Acc:9778]                                        | -1.42 | 5.3E-12 |
| STRIP2     | ENSG00000128578 | striatin interacting protein 2 [Source:HGNC Symbol;Acc:22209]                                          | -1.21 | 5.5E-12 |
| PIP4K2C    | ENSG00000166908 | phosphatidylinositol-5-phosphate 4-kinase, type II, gamma [Source:HGNC Symbol;Acc:23786]               | -1.04 | 5.6E-12 |
| SRD5A3-AS1 | ENSG00000249700 | SRD5A3 antisense RNA 1 [Source:HGNC Symbol;Acc:44138]                                                  | -1.76 | 5.9E-12 |
| --         | ENSG00000272114 | --                                                                                                     | -1.38 | 6.2E-12 |

|          |                 |                                                                                            |       |         |
|----------|-----------------|--------------------------------------------------------------------------------------------|-------|---------|
| PDZD3    | ENSG00000172367 | PDZ domain containing 3 [Source:HGNC Symbol;Acc:19891]                                     | -1.55 | 6.6E-12 |
| RAPGEFL1 | ENSG00000108352 | Rap guanine nucleotide exchange factor (GEF)-like 1 [Source:HGNC Symbol;Acc:17428]         | -1.24 | 6.7E-12 |
| --       | ENSG00000205890 | --                                                                                         | -1.39 | 6.9E-12 |
| FAM63A   | ENSG00000143409 | family with sequence similarity 63, member A [Source:HGNC Symbol;Acc:25648]                | -1.32 | 7.0E-12 |
| HPS5     | ENSG00000110756 | Hermansky-Pudlak syndrome 5 [Source:HGNC Symbol;Acc:17022]                                 | -1.01 | 7.0E-12 |
| --       | ENSG00000267987 | Uncharacterized protein [Source:UniProtKB/TrEMBL;Acc:M0R1V0]                               | -1.87 | 7.2E-12 |
| HGSNAT   | ENSG00000165102 | heparan-alpha-glucosaminide N-acetyltransferase [Source:HGNC Symbol;Acc:26527]             | -0.90 | 7.3E-12 |
| TMEM54   | ENSG00000121900 | transmembrane protein 54 [Source:HGNC Symbol;Acc:24143]                                    | -1.47 | 7.3E-12 |
| CNKSR1   | ENSG00000142675 | connector enhancer of kinase suppressor of Ras 1 [Source:HGNC Symbol;Acc:19700]            | -1.54 | 7.4E-12 |
| LAD1     | ENSG00000159166 | ladinin 1 [Source:HGNC Symbol;Acc:6472]                                                    | -1.00 | 7.4E-12 |
| APOBEC1  | ENSG00000111701 | apolipoprotein B mRNA editing enzyme, catalytic polypeptide 1 [Source:HGNC Symbol;Acc:604] | -1.44 | 7.5E-12 |
| AREG     | ENSG00000109321 | amphiregulin [Source:HGNC Symbol;Acc:651]                                                  | -2.01 | 7.6E-12 |
| MYO1D    | ENSG00000176658 | myosin ID [Source:HGNC Symbol;Acc:7598]                                                    | -0.80 | 7.8E-12 |
| RALB     | ENSG00000144118 | v-ral simian leukemia viral oncogene homolog B [Source:HGNC Symbol;Acc:9840]               | -1.18 | 7.9E-12 |
| HS3ST1   | ENSG00000002587 | heparan sulfate (glucosamine) 3-O-sulfotransferase 1 [Source:HGNC Symbol;Acc:5194]         | -1.26 | 7.9E-12 |
| OAS3     | ENSG00000111331 | 2'-5'-oligoadenylate synthetase 3, 100kDa [Source:HGNC Symbol;Acc:8088]                    | -1.08 | 8.4E-12 |
| ESYT2    | ENSG00000117868 | extended synaptotagmin-like protein 2 [Source:HGNC Symbol;Acc:22211]                       | -0.93 | 8.6E-12 |
| KDM4B    | ENSG00000127663 | lysine (K)-specific demethylase 4B [Source:HGNC Symbol;Acc:29136]                          | -1.18 | 8.8E-12 |
| OGDH     | ENSG00000105953 | oxoglutarate (alpha-ketoglutarate) dehydrogenase (lipoamide) [Source:HGNC Symbol;Acc:8124] | -1.12 | 8.9E-12 |

|           |                 |                                                                                     |       |         |
|-----------|-----------------|-------------------------------------------------------------------------------------|-------|---------|
| IFNLR1    | ENSG00000185436 | interferon, lambda receptor 1 [Source:HGNC Symbol;Acc:18584]                        | -1.10 | 9.3E-12 |
| CXCR5     | ENSG00000160683 | chemokine (C-X-C motif) receptor 5 [Source:HGNC Symbol;Acc:1060]                    | -1.49 | 9.4E-12 |
| C10orf55  | ENSG00000222047 | chromosome 10 open reading frame 55 [Source:HGNC Symbol;Acc:31008]                  | -2.05 | 9.6E-12 |
| PAM       | ENSG00000145730 | peptidylglycine alpha-amidating monooxygenase [Source:HGNC Symbol;Acc:8596]         | -1.26 | 9.8E-12 |
| CDC42BPB  | ENSG00000198752 | CDC42 binding protein kinase beta (DMPK-like) [Source:HGNC Symbol;Acc:1738]         | -0.89 | 1.0E-11 |
| --        | ENSG00000261068 | --                                                                                  | -2.04 | 1.0E-11 |
| CAPN8     | ENSG00000203697 | calpain 8 [Source:HGNC Symbol;Acc:1485]                                             | -1.17 | 1.0E-11 |
| PIM3      | ENSG00000198355 | pim-3 oncogene [Source:HGNC Symbol;Acc:19310]                                       | -1.80 | 1.0E-11 |
| NPEPPS    | ENSG00000141279 | aminopeptidase puromycin sensitive [Source:HGNC Symbol;Acc:7900]                    | -1.01 | 1.0E-11 |
| MUC3A     | ENSG00000169894 | mucin 3A, cell surface associated [Source:HGNC Symbol;Acc:7513]                     | -1.12 | 1.0E-11 |
| SOX13     | ENSG00000143842 | SRY (sex determining region Y)-box 13 [Source:HGNC Symbol;Acc:11192]                | -0.97 | 1.1E-11 |
| C6orf223  | ENSG00000181577 | chromosome 6 open reading frame 223 [Source:HGNC Symbol;Acc:28692]                  | -1.27 | 1.1E-11 |
| CTTNBP2NL | ENSG00000143079 | CTTNBP2 N-terminal like [Source:HGNC Symbol;Acc:25330]                              | -1.26 | 1.1E-11 |
| RETSAT    | ENSG00000042445 | retinol saturase (all-trans-retinol 13,14-reductase) [Source:HGNC Symbol;Acc:25991] | -0.88 | 1.2E-11 |
| DDX60L    | ENSG00000181381 | DEAD (Asp-Glu-Ala-Asp) box polypeptide 60-like [Source:HGNC Symbol;Acc:26429]       | -1.36 | 1.2E-11 |
| RAPGEF3   | ENSG00000079337 | Rap guanine nucleotide exchange factor (GEF) 3 [Source:HGNC Symbol;Acc:16629]       | -1.70 | 1.2E-11 |
| ZSWIM8    | ENSG00000214655 | zinc finger, SWIM-type containing 8 [Source:HGNC Symbol;Acc:23528]                  | -1.40 | 1.3E-11 |
| CCRL2     | ENSG00000121797 | chemokine (C-C motif) receptor-like 2 [Source:HGNC Symbol;Acc:1612]                 | -1.03 | 1.3E-11 |

|           |                 |                                                                                     |       |         |
|-----------|-----------------|-------------------------------------------------------------------------------------|-------|---------|
| C10orf54  | ENSG00000107738 | chromosome 10 open reading frame 54 [Source:HGNC Symbol;Acc:30085]                  | -1.62 | 1.3E-11 |
| MICALL1   | ENSG00000100139 | MICAL-like 1 [Source:HGNC Symbol;Acc:29804]                                         | -1.19 | 1.3E-11 |
| PEA15     | ENSG00000162734 | phosphoprotein enriched in astrocytes 15 [Source:HGNC Symbol;Acc:8822]              | -1.04 | 1.3E-11 |
| KRT17     | ENSG00000128422 | keratin 17 [Source:HGNC Symbol;Acc:6427]                                            | -1.74 | 1.4E-11 |
| EVA1B     | ENSG00000142694 | eva-1 homolog B (C. elegans) [Source:HGNC Symbol;Acc:25558]                         | -1.89 | 1.4E-11 |
| GAL3ST1   | ENSG00000128242 | galactose-3-O-sulfotransferase 1 [Source:HGNC Symbol;Acc:24240]                     | -1.52 | 1.4E-11 |
| ETV6      | ENSG00000139083 | ets variant 6 [Source:HGNC Symbol;Acc:3495]                                         | -0.85 | 1.4E-11 |
| RNF39     | ENSG00000204618 | ring finger protein 39 [Source:HGNC Symbol;Acc:18064]                               | -1.47 | 1.4E-11 |
| CDH1      | ENSG00000039068 | cadherin 1, type 1, E-cadherin (epithelial) [Source:HGNC Symbol;Acc:1748]           | -1.04 | 1.5E-11 |
| TRIP4     | ENSG00000103671 | thyroid hormone receptor interactor 4 [Source:HGNC Symbol;Acc:12310]                | -1.07 | 1.5E-11 |
| PITPNM3   | ENSG00000091622 | PITPNM family member 3 [Source:HGNC Symbol;Acc:21043]                               | -1.09 | 1.5E-11 |
| MYOF      | ENSG00000138119 | myoferlin [Source:HGNC Symbol;Acc:3656]                                             | -1.21 | 1.5E-11 |
| KRT7      | ENSG00000135480 | keratin 7 [Source:HGNC Symbol;Acc:6445]                                             | -1.45 | 1.5E-11 |
| FSTL1     | ENSG00000163430 | folliculin-like 1 [Source:HGNC Symbol;Acc:3972]                                     | -1.70 | 1.5E-11 |
| MCF2L2    | ENSG00000053524 | MCF.2 cell line derived transforming sequence-like 2 [Source:HGNC Symbol;Acc:30319] | -1.35 | 1.5E-11 |
| SOCS3     | ENSG00000184557 | suppressor of cytokine signaling 3 [Source:HGNC Symbol;Acc:19391]                   | -1.70 | 1.5E-11 |
| F2RL1     | ENSG00000164251 | coagulation factor II (thrombin) receptor-like 1 [Source:HGNC Symbol;Acc:3538]      | -1.27 | 1.5E-11 |
| CDC42SE1  | ENSG00000197622 | CDC42 small effector 1 [Source:HGNC Symbol;Acc:17719]                               | -0.81 | 1.7E-11 |
| P4HA2-AS1 | ENSG00000237714 | P4HA2 antisense RNA 1 [Source:HGNC Symbol;Acc:43560]                                | -1.05 | 1.7E-11 |
| IFI27     | ENSG00000165949 | interferon, alpha-inducible protein 27 [Source:HGNC Symbol;Acc:5397]                | -1.21 | 1.7E-11 |
| YPEL5     | ENSG00000119801 | yippee-like 5 (Drosophila) [Source:HGNC Symbol;Acc:18329]                           | -1.11 | 1.7E-11 |

|          |                 |                                                                                                  |       |         |
|----------|-----------------|--------------------------------------------------------------------------------------------------|-------|---------|
| CCRN4L   | ENSG00000151014 | CCR4 carbon catabolite repression 4-like ( <i>S. cerevisiae</i> ) [Source:HGNC Symbol;Acc:14254] | -1.70 | 1.7E-11 |
| --       | ENSG00000267387 | --                                                                                               | -1.41 | 1.7E-11 |
| PTPRF    | ENSG00000142949 | protein tyrosine phosphatase, receptor type, F [Source:HGNC Symbol;Acc:9670]                     | -0.93 | 1.7E-11 |
| MAPKBP1  | ENSG00000137802 | mitogen-activated protein kinase binding protein 1 [Source:HGNC Symbol;Acc:29536]                | -1.27 | 1.7E-11 |
| SMAP1    | ENSG00000112305 | small ArfGAP 1 [Source:HGNC Symbol;Acc:19651]                                                    | -1.01 | 1.7E-11 |
| CEACAM18 | ENSG00000213822 | carcinoembryonic antigen-related cell adhesion molecule 18 [Source:HGNC Symbol;Acc:31949]        | -2.34 | 1.8E-11 |
| KRT19    | ENSG00000171345 | keratin 19 [Source:HGNC Symbol;Acc:6436]                                                         | -1.47 | 1.9E-11 |
| UBE2H    | ENSG00000186591 | ubiquitin-conjugating enzyme E2H [Source:HGNC Symbol;Acc:12484]                                  | -0.87 | 2.0E-11 |
| GRHL3    | ENSG00000158055 | grainyhead-like 3 ( <i>Drosophila</i> ) [Source:HGNC Symbol;Acc:25839]                           | -1.44 | 2.0E-11 |
| TJP3     | ENSG00000105289 | tight junction protein 3 [Source:HGNC Symbol;Acc:11829]                                          | -1.45 | 2.1E-11 |
| ATG16L1  | ENSG00000085978 | autophagy related 16-like 1 ( <i>S. cerevisiae</i> ) [Source:HGNC Symbol;Acc:21498]              | -0.96 | 2.1E-11 |
| --       | ENSG00000261040 | --                                                                                               | -1.83 | 2.1E-11 |
| --       | ENSG00000235481 | --                                                                                               | -1.59 | 2.1E-11 |
| ZSWIM4   | ENSG00000132003 | zinc finger, SWIM-type containing 4 [Source:HGNC Symbol;Acc:25704]                               | -1.46 | 2.1E-11 |
| GPR128   | ENSG00000144820 | G protein-coupled receptor 128 [Source:HGNC Symbol;Acc:19241]                                    | -1.39 | 2.2E-11 |
| RDH13    | ENSG00000160439 | retinol dehydrogenase 13 (all-trans/9-cis) [Source:HGNC Symbol;Acc:19978]                        | -1.14 | 2.3E-11 |
| BRI3     | ENSG00000164713 | brain protein I3 [Source:HGNC Symbol;Acc:1109]                                                   | -0.92 | 2.3E-11 |
| SPAG9    | ENSG00000008294 | sperm associated antigen 9 [Source:HGNC Symbol;Acc:14524]                                        | -0.92 | 2.3E-11 |
| KDM2A    | ENSG00000173120 | lysine (K)-specific demethylase 2A [Source:HGNC Symbol;Acc:13606]                                | -0.68 | 2.4E-11 |
| COQ10B   | ENSG00000115520 | coenzyme Q10 homolog B ( <i>S. cerevisiae</i> ) [Source:HGNC Symbol;Acc:25819]                   | -1.01 | 2.4E-11 |

|           |                 |                                                                                                                       |       |         |
|-----------|-----------------|-----------------------------------------------------------------------------------------------------------------------|-------|---------|
| RAC1      | ENSG00000136238 | ras-related C3 botulinum toxin substrate 1 (rho family, small GTP binding protein Rac1) [Source:HGNC Symbol;Acc:9801] | -0.83 | 2.4E-11 |
| SH3RF2    | ENSG00000156463 | SH3 domain containing ring finger 2 [Source:HGNC Symbol;Acc:26299]                                                    | -0.83 | 2.4E-11 |
| TBX6      | ENSG00000149922 | T-box 6 [Source:HGNC Symbol;Acc:11605]                                                                                | -1.12 | 2.4E-11 |
| KRT15     | ENSG00000171346 | keratin 15 [Source:HGNC Symbol;Acc:6421]                                                                              | -1.40 | 2.5E-11 |
| SPRED2    | ENSG00000198369 | sprouty-related, EVH1 domain containing 2 [Source:HGNC Symbol;Acc:17722]                                              | -0.89 | 2.5E-11 |
| TNFRSF10B | ENSG00000120889 | tumor necrosis factor receptor superfamily, member 10b [Source:HGNC Symbol;Acc:11905]                                 | -0.96 | 2.7E-11 |
| SLAMF9    | ENSG00000162723 | SLAM family member 9 [Source:HGNC Symbol;Acc:18430]                                                                   | -1.69 | 2.8E-11 |
| LMBR1L    | ENSG00000139636 | limb development membrane protein 1-like [Source:HGNC Symbol;Acc:18268]                                               | -1.08 | 2.9E-11 |
| IER5      | ENSG00000162783 | immediate early response 5 [Source:HGNC Symbol;Acc:5393]                                                              | -1.05 | 2.9E-11 |
| MED15     | ENSG00000099917 | mediator complex subunit 15 [Source:HGNC Symbol;Acc:14248]                                                            | -1.48 | 3.0E-11 |
| GPD2      | ENSG00000115159 | glycerol-3-phosphate dehydrogenase 2 (mitochondrial) [Source:HGNC Symbol;Acc:4456]                                    | -1.23 | 3.1E-11 |
| SAP30BP   | ENSG00000161526 | SAP30 binding protein [Source:HGNC Symbol;Acc:30785]                                                                  | -0.90 | 3.1E-11 |
| ABCA5     | ENSG00000154265 | ATP-binding cassette, sub-family A (ABC1), member 5 [Source:HGNC Symbol;Acc:35]                                       | -1.36 | 3.1E-11 |
| SYNPO     | ENSG00000171992 | synaptopodin [Source:HGNC Symbol;Acc:30672]                                                                           | -1.27 | 3.2E-11 |
| CAPG      | ENSG00000042493 | capping protein (actin filament), gelsolin-like [Source:HGNC Symbol;Acc:1474]                                         | -1.14 | 3.2E-11 |
| HIST1H2AC | ENSG00000180573 | histone cluster 1, H2ac [Source:HGNC Symbol;Acc:4733]                                                                 | -1.19 | 3.3E-11 |
| BTBD9     | ENSG00000183826 | BTB (POZ) domain containing 9 [Source:HGNC Symbol;Acc:21228]                                                          | -1.23 | 3.3E-11 |
| --        | ENSG00000259627 | --                                                                                                                    | -1.08 | 3.3E-11 |
| UNC13A    | ENSG00000130477 | unc-13 homolog A (C. elegans) [Source:HGNC Symbol;Acc:23150]                                                          | -2.02 | 3.4E-11 |
| TMEM176A  | ENSG00000002933 | transmembrane protein 176A [Source:HGNC Symbol;Acc:24930]                                                             | -1.03 | 3.4E-11 |

|            |                 |                                                                                                               |       |         |
|------------|-----------------|---------------------------------------------------------------------------------------------------------------|-------|---------|
| HIGD1A     | ENSG00000181061 | HIG1 hypoxia inducible domain family, member 1A [Source:HGNC Symbol;Acc:29527]                                | -1.31 | 3.4E-11 |
| HDAC9      | ENSG00000048052 | histone deacetylase 9 [Source:HGNC Symbol;Acc:14065]                                                          | -1.65 | 3.5E-11 |
| ERBB3      | ENSG00000065361 | v-erb-b2 avian erythroblastic leukemia viral oncogene homolog 3 [Source:HGNC Symbol;Acc:3431]                 | -0.85 | 3.6E-11 |
| SRC        | ENSG00000197122 | v-src avian sarcoma (Schmidt-Ruppin A-2) viral oncogene homolog [Source:HGNC Symbol;Acc:11283]                | -1.11 | 3.6E-11 |
| KDM7A      | ENSG00000006459 | lysine (K)-specific demethylase 7A [Source:HGNC Symbol;Acc:22224]                                             | -1.21 | 3.6E-11 |
| SRPX2      | ENSG00000102359 | sushi-repeat containing protein, X-linked 2 [Source:HGNC Symbol;Acc:30668]                                    | -1.11 | 3.7E-11 |
| FAM219A    | ENSG00000164970 | family with sequence similarity 219, member A [Source:HGNC Symbol;Acc:19920]                                  | -1.15 | 3.7E-11 |
| RRAGC      | ENSG00000116954 | Ras-related GTP binding C [Source:HGNC Symbol;Acc:19902]                                                      | -1.25 | 3.8E-11 |
| PLS1       | ENSG00000120756 | plastin 1 [Source:HGNC Symbol;Acc:9090]                                                                       | -1.68 | 3.8E-11 |
| DNAH17-AS1 | ENSG00000268470 | DNAH17 antisense RNA 1 [Source:HGNC Symbol;Acc:48594]                                                         | -1.74 | 4.1E-11 |
| SLC25A23   | ENSG00000125648 | solute carrier family 25 (mitochondrial carrier; phosphate carrier), member 23 [Source:HGNC Symbol;Acc:19375] | -1.17 | 4.2E-11 |
| CHAC1      | ENSG00000128965 | ChaC, cation transport regulator homolog 1 (E. coli) [Source:HGNC Symbol;Acc:28680]                           | -2.32 | 4.2E-11 |
| ORMDL2     | ENSG00000123353 | ORM1-like 2 (S. cerevisiae) [Source:HGNC Symbol;Acc:16037]                                                    | -0.94 | 4.2E-11 |
| FNDC3B     | ENSG00000075420 | fibronectin type III domain containing 3B [Source:HGNC Symbol;Acc:24670]                                      | -1.26 | 4.3E-11 |
| SLC2A1     | ENSG00000117394 | solute carrier family 2 (facilitated glucose transporter), member 1 [Source:HGNC Symbol;Acc:11005]            | -1.23 | 4.4E-11 |
| PITPNM2    | ENSG00000090975 | phosphatidylinositol transfer protein, membrane-associated 2 [Source:HGNC Symbol;Acc:21044]                   | -1.25 | 4.4E-11 |
| ASS1       | ENSG00000130707 | argininosuccinate synthase 1 [Source:HGNC Symbol;Acc:758]                                                     | -1.32 | 4.4E-11 |
| TEAD3      | ENSG00000007866 | TEA domain family member 3 [Source:HGNC Symbol;Acc:11716]                                                     | -1.14 | 4.6E-11 |

|          |                 |                                                                                      |       |         |
|----------|-----------------|--------------------------------------------------------------------------------------|-------|---------|
| BAMBI    | ENSG00000095739 | BMP and activin membrane-bound inhibitor [Source:HGNC Symbol;Acc:30251]              | -1.26 | 4.7E-11 |
| PLD2     | ENSG00000129219 | phospholipase D2 [Source:HGNC Symbol;Acc:9068]                                       | -1.25 | 4.7E-11 |
| GGT6     | ENSG00000167741 | gamma-glutamyltransferase 6 [Source:HGNC Symbol;Acc:26891]                           | -1.03 | 4.9E-11 |
| PADI2    | ENSG00000117115 | peptidyl arginine deiminase, type II [Source:HGNC Symbol;Acc:18341]                  | -1.59 | 5.0E-11 |
| KLF3     | ENSG00000109787 | Kruppel-like factor 3 (basic) [Source:HGNC Symbol;Acc:16516]                         | -1.21 | 5.0E-11 |
| KCTD1    | ENSG00000134504 | potassium channel tetramerization domain containing 1 [Source:HGNC Symbol;Acc:18249] | -1.19 | 5.1E-11 |
| PRSS22   | ENSG00000005001 | protease, serine, 22 [Source:HGNC Symbol;Acc:14368]                                  | -1.50 | 5.2E-11 |
| KRT121P  | ENSG00000135477 | keratin 121 pseudogene [Source:HGNC Symbol;Acc:30198]                                | -1.57 | 5.3E-11 |
| CXCL16   | ENSG00000161921 | chemokine (C-X-C motif) ligand 16 [Source:HGNC Symbol;Acc:16642]                     | -0.96 | 5.4E-11 |
| ARHGAP27 | ENSG00000159314 | Rho GTPase activating protein 27 [Source:HGNC Symbol;Acc:31813]                      | -1.45 | 5.4E-11 |
| GPRIN2   | ENSG00000204175 | G protein regulated inducer of neurite outgrowth 2 [Source:HGNC Symbol;Acc:23730]    | -1.70 | 5.5E-11 |
| GDA      | ENSG00000119125 | guanine deaminase [Source:HGNC Symbol;Acc:4212]                                      | -1.21 | 5.6E-11 |
| DCLRE1A  | ENSG00000198924 | DNA cross-link repair 1A [Source:HGNC Symbol;Acc:17660]                              | -1.42 | 5.7E-11 |
| RHPN2    | ENSG00000131941 | rhophilin, Rho GTPase binding protein 2 [Source:HGNC Symbol;Acc:19974]               | -1.13 | 5.8E-11 |
| ICAM1    | ENSG00000090339 | intercellular adhesion molecule 1 [Source:HGNC Symbol;Acc:5344]                      | -1.85 | 5.8E-11 |
| GPR37L1  | ENSG00000170075 | G protein-coupled receptor 37 like 1 [Source:HGNC Symbol;Acc:14923]                  | -1.33 | 5.8E-11 |
| --       | ENSG00000269018 | Uncharacterized protein [Source:UniProtKB/TrEMBL;Acc:M0QXL3]                         | -1.55 | 5.9E-11 |
| PVR      | ENSG00000073008 | poliovirus receptor [Source:HGNC Symbol;Acc:9705]                                    | -0.93 | 6.0E-11 |
| SAA1     | ENSG00000173432 | serum amyloid A1 [Source:HGNC Symbol;Acc:10513]                                      | -1.50 | 6.0E-11 |
| --       | ENSG00000231748 | --                                                                                   | -1.35 | 6.1E-11 |
| S100A14  | ENSG00000189334 | S100 calcium binding protein A14 [Source:HGNC Symbol;Acc:18901]                      | -1.01 | 6.2E-11 |
| MKNK1    | ENSG00000079277 | MAP kinase interacting serine/threonine kinase 1 [Source:HGNC Symbol;Acc:7110]       | -0.99 | 6.5E-11 |



|            |                 |                                                                                                    |       |         |
|------------|-----------------|----------------------------------------------------------------------------------------------------|-------|---------|
| UBAP1      | ENSG00000165006 | ubiquitin associated protein 1 [Source:HGNC Symbol;Acc:12461]                                      | -0.79 | 6.5E-11 |
| OTUD7B     | ENSG00000163113 | OTU domain containing 7B [Source:HGNC Symbol;Acc:16683]                                            | -0.91 | 6.5E-11 |
| PRRT2      | ENSG00000167371 | proline-rich transmembrane protein 2 [Source:HGNC Symbol;Acc:30500]                                | -1.56 | 6.5E-11 |
| TRAF6      | ENSG00000175104 | TNF receptor-associated factor 6, E3 ubiquitin protein ligase [Source:HGNC Symbol;Acc:12036]       | -1.09 | 6.6E-11 |
| FLVCR2     | ENSG00000119686 | feline leukemia virus subgroup C cellular receptor family, member 2 [Source:HGNC Symbol;Acc:20105] | -1.16 | 6.6E-11 |
| PTPN3      | ENSG00000070159 | protein tyrosine phosphatase, non-receptor type 3 [Source:HGNC Symbol;Acc:9655]                    | -0.79 | 6.7E-11 |
| C19orf66   | ENSG00000130813 | chromosome 19 open reading frame 66 [Source:HGNC Symbol;Acc:25649]                                 | -1.06 | 6.7E-11 |
| TMEM45A    | ENSG00000181458 | transmembrane protein 45A [Source:HGNC Symbol;Acc:25480]                                           | -1.23 | 6.8E-11 |
| FAM83A-AS1 | ENSG00000204949 | FAM83A antisense RNA 1 [Source:HGNC Symbol;Acc:48658]                                              | -1.73 | 6.9E-11 |
| SLC45A4    | ENSG00000022567 | solute carrier family 45, member 4 [Source:HGNC Symbol;Acc:29196]                                  | -1.04 | 6.9E-11 |
| CASP16     | ENSG00000228146 | caspase 16, apoptosis-related cysteine peptidase (putative) [Source:HGNC Symbol;Acc:27290]         | -2.50 | 7.0E-11 |
| HECTD3     | ENSG00000126107 | HECT domain containing E3 ubiquitin protein ligase 3 [Source:HGNC Symbol;Acc:26117]                | -1.01 | 7.0E-11 |
| DUSP7      | ENSG00000164086 | dual specificity phosphatase 7 [Source:HGNC Symbol;Acc:3073]                                       | -1.28 | 7.0E-11 |
| DIAPH1     | ENSG00000131504 | diaphanous-related formin 1 [Source:HGNC Symbol;Acc:2876]                                          | -0.87 | 7.1E-11 |
| CCDC64B    | ENSG00000162069 | coiled-coil domain containing 64B [Source:HGNC Symbol;Acc:33584]                                   | -1.49 | 7.2E-11 |
| ERBB2IP    | ENSG00000112851 | erbb2 interacting protein [Source:HGNC Symbol;Acc:15842]                                           | -1.30 | 7.3E-11 |
| SIRT2      | ENSG00000068903 | sirtuin 2 [Source:HGNC Symbol;Acc:10886]                                                           | -1.11 | 7.6E-11 |
| MAST2      | ENSG00000086015 | microtubule associated serine/threonine kinase 2 [Source:HGNC Symbol;Acc:19035]                    | -1.13 | 7.8E-11 |
| MDFI       | ENSG00000112559 | MyoD family inhibitor [Source:HGNC Symbol;Acc:6967]                                                | -1.78 | 7.9E-11 |
| ZBTB34     | ENSG00000177125 | zinc finger and BTB domain containing 34 [Source:HGNC Symbol;Acc:31446]                            | -1.07 | 8.0E-11 |

|           |                 |                                                                                                         |       |         |
|-----------|-----------------|---------------------------------------------------------------------------------------------------------|-------|---------|
| USH1G     | ENSG00000182040 | Usher syndrome 1G (autosomal recessive) [Source:HGNC Symbol;Acc:16356]                                  | -2.27 | 8.0E-11 |
| RAP1B     | ENSG00000127314 | RAP1B, member of RAS oncogene family [Source:HGNC Symbol;Acc:9857]                                      | -1.31 | 8.0E-11 |
| KRT12     | ENSG00000187242 | keratin 12 [Source:HGNC Symbol;Acc:6414]                                                                | -1.71 | 8.1E-11 |
| ETV3      | ENSG00000117036 | ets variant 3 [Source:HGNC Symbol;Acc:3492]                                                             | -1.06 | 8.2E-11 |
| PNPLA2    | ENSG00000177666 | patatin-like phospholipase domain containing 2 [Source:HGNC Symbol;Acc:30802]                           | -1.75 | 8.3E-11 |
| HLA-F-AS1 | ENSG00000214922 | HLA-F antisense RNA 1 [Source:HGNC Symbol;Acc:26645]                                                    | -1.43 | 8.6E-11 |
| TMEM62    | ENSG00000137842 | transmembrane protein 62 [Source:HGNC Symbol;Acc:26269]                                                 | -0.82 | 8.8E-11 |
| B3GNT7    | ENSG00000156966 | UDP-GlcNAc:betaGal beta-1,3-N-acetylglucosaminyltransferase 7 [Source:HGNC Symbol;Acc:18811]            | -1.63 | 9.0E-11 |
| --        | ENSG00000261385 | --                                                                                                      | -1.62 | 9.1E-11 |
| TNFSF15   | ENSG00000181634 | tumor necrosis factor (ligand) superfamily, member 15 [Source:HGNC Symbol;Acc:11931]                    | -1.36 | 9.9E-11 |
| KYNU      | ENSG00000115919 | kynureninase [Source:HGNC Symbol;Acc:6469]                                                              | -1.12 | 9.9E-11 |
| TNFAIP3   | ENSG00000118503 | tumor necrosis factor, alpha-induced protein 3 [Source:HGNC Symbol;Acc:11896]                           | -1.28 | 1.0E-10 |
| DLL4      | ENSG00000128917 | delta-like 4 (Drosophila) [Source:HGNC Symbol;Acc:2910]                                                 | -1.62 | 1.0E-10 |
| SLC35D2   | ENSG00000130958 | solute carrier family 35 (UDP-GlcNAc/UDP-glucose transporter), member D2 [Source:HGNC Symbol;Acc:20799] | -0.95 | 1.0E-10 |
| SLC26A3   | ENSG00000091138 | solute carrier family 26 (anion exchanger), member 3 [Source:HGNC Symbol;Acc:3018]                      | -2.86 | 1.0E-10 |
| STK10     | ENSG00000072786 | serine/threonine kinase 10 [Source:HGNC Symbol;Acc:11388]                                               | -1.08 | 1.1E-10 |
| TMEM79    | ENSG00000163472 | transmembrane protein 79 [Source:HGNC Symbol;Acc:28196]                                                 | -1.13 | 1.1E-10 |
| --        | ENSG00000257342 | --                                                                                                      | -0.96 | 1.2E-10 |
| IL17RE    | ENSG00000163701 | interleukin 17 receptor E [Source:HGNC Symbol;Acc:18439]                                                | -1.02 | 1.2E-10 |
| UNC13D    | ENSG00000092929 | unc-13 homolog D (C. elegans) [Source:HGNC Symbol;Acc:23147]                                            | -1.41 | 1.2E-10 |
| GOLGA2    | ENSG00000167110 | golgin A2 [Source:HGNC Symbol;Acc:4425]                                                                 | -0.96 | 1.3E-10 |

|          |                 |                                                                                               |       |         |
|----------|-----------------|-----------------------------------------------------------------------------------------------|-------|---------|
| C11orf80 | ENSG00000173715 | chromosome 11 open reading frame 80 [Source:HGNC Symbol;Acc:26197]                            | -1.01 | 1.3E-10 |
| JUP      | ENSG00000173801 | junction plakoglobin [Source:HGNC Symbol;Acc:6207]                                            | -1.29 | 1.3E-10 |
| DOCK1    | ENSG00000150760 | dedicator of cytokinesis 1 [Source:HGNC Symbol;Acc:2987]                                      | -1.05 | 1.3E-10 |
| DHRS3    | ENSG00000162496 | dehydrogenase/reductase (SDR family) member 3 [Source:HGNC Symbol;Acc:17693]                  | -1.21 | 1.3E-10 |
| UACA     | ENSG00000137831 | uveal autoantigen with coiled-coil domains and ankyrin repeats [Source:HGNC Symbol;Acc:15947] | -1.18 | 1.4E-10 |
| SYTL4    | ENSG00000102362 | synaptotagmin-like 4 [Source:HGNC Symbol;Acc:15588]                                           | -1.01 | 1.4E-10 |
| RNF213   | ENSG00000173821 | ring finger protein 213 [Source:HGNC Symbol;Acc:14539]                                        | -0.76 | 1.4E-10 |
| IFNGR1   | ENSG00000027697 | interferon gamma receptor 1 [Source:HGNC Symbol;Acc:5439]                                     | -1.26 | 1.4E-10 |
| EPS8     | ENSG00000151491 | epidermal growth factor receptor pathway substrate 8 [Source:HGNC Symbol;Acc:3420]            | -1.23 | 1.5E-10 |
| EFNB1    | ENSG00000090776 | ephrin-B1 [Source:HGNC Symbol;Acc:3226]                                                       | -1.33 | 1.5E-10 |
| FAM43A   | ENSG00000185112 | family with sequence similarity 43, member A [Source:HGNC Symbol;Acc:26888]                   | -1.56 | 1.5E-10 |
| --       | ENSG00000254003 | --                                                                                            | -1.20 | 1.6E-10 |
| KIAA1432 | ENSG00000107036 | KIAA1432 [Source:HGNC Symbol;Acc:17686]                                                       | -1.05 | 1.6E-10 |
| VDR      | ENSG00000111424 | vitamin D (1,25- dihydroxyvitamin D3) receptor [Source:HGNC Symbol;Acc:12679]                 | -0.97 | 1.7E-10 |
| TDRD7    | ENSG00000196116 | tudor domain containing 7 [Source:HGNC Symbol;Acc:30831]                                      | -1.01 | 1.7E-10 |
| HLA-C    | ENSG00000204525 | major histocompatibility complex, class I, C [Source:HGNC Symbol;Acc:4933]                    | -1.22 | 1.8E-10 |
| NPHS2    | ENSG00000116218 | nephrosis 2, idiopathic, steroid-resistant (podocin) [Source:HGNC Symbol;Acc:13394]           | -1.40 | 1.8E-10 |
| STPG1    | ENSG00000001460 | sperm-tail PG-rich repeat containing 1 [Source:HGNC Symbol;Acc:28070]                         | -1.17 | 1.8E-10 |
| --       | ENSG00000233223 | --                                                                                            | -1.04 | 1.9E-10 |
| ANGPTL4  | ENSG00000167772 | angiopoietin-like 4 [Source:HGNC Symbol;Acc:16039]                                            | -1.88 | 1.9E-10 |

|           |                 |                                                                                                                                                       |       |         |
|-----------|-----------------|-------------------------------------------------------------------------------------------------------------------------------------------------------|-------|---------|
| ABHD11    | ENSG00000106077 | abhydrolase domain containing 11 [Source:HGNC Symbol;Acc:16407]<br>DENN/MADD domain containing 2D [Source:HGNC<br>Symbol;Acc:26192]                   | -1.27 | 1.9E-10 |
| DENND2D   | ENSG00000162777 | transmembrane protein 159 [Source:HGNC Symbol;Acc:30136]                                                                                              | -0.90 | 1.9E-10 |
| TMEM159   | ENSG00000011638 | distal-less homeobox 3 [Source:HGNC Symbol;Acc:2916]                                                                                                  | -1.11 | 2.0E-10 |
| DLX3      | ENSG00000064195 | thyroid hormone receptor interactor 10 [Source:HGNC<br>Symbol;Acc:12304]                                                                              | -2.42 | 2.0E-10 |
| TRIP10    | ENSG00000125733 | programmed cell death 6 interacting protein [Source:HGNC<br>Symbol;Acc:8766]                                                                          | -1.09 | 2.1E-10 |
| PDCD6IP   | ENSG00000170248 | sema domain, immunoglobulin domain (Ig), transmembrane domain<br>(TM) and short cytoplasmic domain, (semaphorin) 4G [Source:HGNC<br>Symbol;Acc:10735] | -1.04 | 2.1E-10 |
| SEMA4G    | ENSG00000095539 | caspase 7, apoptosis-related cysteine peptidase [Source:HGNC<br>Symbol;Acc:1508]                                                                      | -0.92 | 2.2E-10 |
| CASP7     | ENSG00000165806 | DnaJ (Hsp40) homolog, subfamily B, member 9 [Source:HGNC<br>Symbol;Acc:6968]                                                                          | -1.05 | 2.2E-10 |
| DNAJB9    | ENSG00000128590 | Janus kinase 2 [Source:HGNC Symbol;Acc:6192]                                                                                                          | -1.49 | 2.3E-10 |
| JAK2      | ENSG00000096968 | sideroflexin 3 [Source:HGNC Symbol;Acc:16087]                                                                                                         | -1.24 | 2.4E-10 |
| SFXN3     | ENSG00000107819 | chromosome 20 open reading frame 112 [Source:HGNC<br>Symbol;Acc:16106]                                                                                | -0.91 | 2.4E-10 |
| C20orf112 | ENSG00000197183 | Rho GTPase activating protein 42 [Source:HGNC Symbol;Acc:26545]                                                                                       | -0.76 | 2.4E-10 |
| ARHGAP42  | ENSG00000165895 | prostate transmembrane protein, androgen induced 1 [Source:HGNC<br>Symbol;Acc:14107]                                                                  | -1.23 | 2.5E-10 |
| PMEPA1    | ENSG00000124225 | myeloid cell leukemia sequence 1 (BCL2-related) [Source:HGNC<br>Symbol;Acc:6943]                                                                      | -1.09 | 2.5E-10 |
| MCL1      | ENSG00000143384 | --                                                                                                                                                    | -0.97 | 2.6E-10 |
| --        | ENSG00000231840 | --                                                                                                                                                    | -1.03 | 2.6E-10 |
| ZNF274    | ENSG00000171606 | zinc finger protein 274 [Source:HGNC Symbol;Acc:13068]                                                                                                | -0.89 | 2.7E-10 |
| GABRE     | ENSG00000102287 | gamma-aminobutyric acid (GABA) A receptor, epsilon [Source:HGNC<br>Symbol;Acc:4085]                                                                   | -1.05 | 2.7E-10 |

|         |                 |                                                                                                                            |       |         |
|---------|-----------------|----------------------------------------------------------------------------------------------------------------------------|-------|---------|
| DQX1    | ENSG00000144045 | DEAQ box RNA-dependent ATPase 1 [Source:HGNC Symbol;Acc:20410]                                                             | -1.17 | 2.7E-10 |
| HSPB8   | ENSG00000152137 | heat shock 22kDa protein 8 [Source:HGNC Symbol;Acc:30171]                                                                  | -1.37 | 2.8E-10 |
| STX12   | ENSG00000117758 | syntaxin 12 [Source:HGNC Symbol;Acc:11430]                                                                                 | -1.20 | 2.8E-10 |
| SLC1A7  | ENSG00000162383 | solute carrier family 1 (glutamate transporter), member 7 [Source:HGNC Symbol;Acc:10945]                                   | -1.55 | 2.9E-10 |
| --      | ENSG00000258130 | Uncharacterized protein [Source:UniProtKB/TrEMBL;Acc:F8VWA3]                                                               | -1.99 | 2.9E-10 |
| GPR108  | ENSG00000125734 | G protein-coupled receptor 108 [Source:HGNC Symbol;Acc:17829]                                                              | -1.08 | 2.9E-10 |
| ZNF823  | ENSG00000197933 | zinc finger protein 823 [Source:HGNC Symbol;Acc:30936]                                                                     | -1.16 | 2.9E-10 |
| PLLP    | ENSG00000102934 | plasmolipin [Source:HGNC Symbol;Acc:18553]                                                                                 | -0.87 | 3.0E-10 |
| SH3BP2  | ENSG00000087266 | SH3-domain binding protein 2 [Source:HGNC Symbol;Acc:10825]                                                                | -0.89 | 3.0E-10 |
| ITGB1   | ENSG00000150093 | integrin, beta 1 (fibronectin receptor, beta polypeptide, antigen CD29 includes MDF2, MSK12) [Source:HGNC Symbol;Acc:6153] | -1.23 | 3.0E-10 |
| SLC6A20 | ENSG00000163817 | solute carrier family 6 (proline IMINO transporter), member 20 [Source:HGNC Symbol;Acc:30927]                              | -1.52 | 3.1E-10 |
| DAPK1   | ENSG00000196730 | death-associated protein kinase 1 [Source:HGNC Symbol;Acc:2674]                                                            | -0.95 | 3.2E-10 |
| RIMS3   | ENSG00000117016 | regulating synaptic membrane exocytosis 3 [Source:HGNC Symbol;Acc:21292]                                                   | -1.27 | 3.2E-10 |
| ADCY4   | ENSG00000129467 | adenylate cyclase 4 [Source:HGNC Symbol;Acc:235]                                                                           | -1.34 | 3.4E-10 |
| TUBB6   | ENSG00000176014 | tubulin, beta 6 class V [Source:HGNC Symbol;Acc:20776]                                                                     | -0.90 | 3.4E-10 |
| PROSER2 | ENSG00000148426 | proline and serine-rich protein 2 [Source:HGNC Symbol;Acc:23728]                                                           | -1.11 | 3.6E-10 |
| JUNB    | ENSG00000171223 | jun B proto-oncogene [Source:HGNC Symbol;Acc:6205]                                                                         | -1.66 | 3.7E-10 |
| TLE4    | ENSG00000106829 | transducin-like enhancer of split 4 (E(sp1) homolog, Drosophila) [Source:HGNC Symbol;Acc:11840]                            | -1.54 | 3.7E-10 |
| TFPI    | ENSG00000003436 | tissue factor pathway inhibitor (lipoprotein-associated coagulation inhibitor) [Source:HGNC Symbol;Acc:11760]              | -1.38 | 3.7E-10 |
| GNB1    | ENSG00000078369 | guanine nucleotide binding protein (G protein), beta polypeptide 1 [Source:HGNC Symbol;Acc:4396]                           | -0.79 | 3.7E-10 |

|          |                 |                                                                                                                                      |       |         |
|----------|-----------------|--------------------------------------------------------------------------------------------------------------------------------------|-------|---------|
| ABCD1    | ENSG00000101986 | ATP-binding cassette, sub-family D (ALD), member 1 [Source:HGNC Symbol;Acc:61]                                                       | -1.49 | 3.8E-10 |
| STOML1   | ENSG00000067221 | stomatin (EPB72)-like 1 [Source:HGNC Symbol;Acc:14560]                                                                               | -1.54 | 3.9E-10 |
| LRRC8A   | ENSG00000136802 | leucine rich repeat containing 8 family, member A [Source:HGNC Symbol;Acc:19027]                                                     | -1.19 | 3.9E-10 |
| TAPBP    | ENSG00000231925 | TAP binding protein (tapasin) [Source:HGNC Symbol;Acc:11566]                                                                         | -1.09 | 3.9E-10 |
| SEC14L1  | ENSG00000129657 | SEC14-like 1 ( <i>S. cerevisiae</i> ) [Source:HGNC Symbol;Acc:10698]                                                                 | -0.95 | 4.1E-10 |
| PDLIM5   | ENSG00000163110 | PDZ and LIM domain 5 [Source:HGNC Symbol;Acc:17468]                                                                                  | -1.10 | 4.2E-10 |
| PPP1R15A | ENSG00000087074 | protein phosphatase 1, regulatory subunit 15A [Source:HGNC Symbol;Acc:14375]                                                         | -1.54 | 4.2E-10 |
| --       | ENSG00000253972 | --                                                                                                                                   | -1.01 | 4.4E-10 |
| MYRF     | ENSG00000124920 | myelin regulatory factor [Source:HGNC Symbol;Acc:1181]                                                                               | -1.06 | 4.5E-10 |
| SBNO2    | ENSG00000064932 | strawberry notch homolog 2 ( <i>Drosophila</i> ) [Source:HGNC Symbol;Acc:29158]                                                      | -1.59 | 4.6E-10 |
| SPRY2    | ENSG00000136158 | sprouty homolog 2 ( <i>Drosophila</i> ) [Source:HGNC Symbol;Acc:11270]                                                               | -1.06 | 4.8E-10 |
| TJP2     | ENSG00000119139 | tight junction protein 2 [Source:HGNC Symbol;Acc:11828]                                                                              | -0.86 | 5.3E-10 |
| MLLT4    | ENSG00000130396 | myeloid/lymphoid or mixed-lineage leukemia (trithorax homolog, <i>Drosophila</i> ); translocated to, 4 [Source:HGNC Symbol;Acc:7137] | -1.07 | 5.3E-10 |
| CSRNP2   | ENSG00000110925 | cysteine-serine-rich nuclear protein 2 [Source:HGNC Symbol;Acc:16006]                                                                | -0.94 | 5.4E-10 |
| RNF144A  | ENSG00000151692 | ring finger protein 144A [Source:HGNC Symbol;Acc:20457]                                                                              | -1.27 | 5.6E-10 |
| CYTH3    | ENSG00000008256 | cytohesin 3 [Source:HGNC Symbol;Acc:9504]                                                                                            | -1.09 | 5.6E-10 |
| AK1      | ENSG00000106992 | adenylate kinase 1 [Source:HGNC Symbol;Acc:361]                                                                                      | -1.20 | 5.7E-10 |
| NCCRP1   | ENSG00000188505 | non-specific cytotoxic cell receptor protein 1 homolog (zebrafish) [Source:HGNC Symbol;Acc:33739]                                    | -1.73 | 5.7E-10 |
| MBOAT2   | ENSG00000143797 | membrane bound O-acyltransferase domain containing 2 [Source:HGNC Symbol;Acc:25193]                                                  | -1.11 | 5.7E-10 |
| HELZ2    | ENSG00000130589 | helicase with zinc finger 2, transcriptional coactivator [Source:HGNC Symbol;Acc:30021]                                              | -1.33 | 5.7E-10 |

|          |                 |                                                                                    |       |         |
|----------|-----------------|------------------------------------------------------------------------------------|-------|---------|
| PAQR8    | ENSG00000170915 | progesterone and adipoQ receptor family member VIII [Source:HGNC Symbol;Acc:15708] | -1.26 | 5.7E-10 |
| KRT8     | ENSG00000170421 | keratin 8 [Source:HGNC Symbol;Acc:6446]                                            | -1.27 | 5.7E-10 |
| SDCBP    | ENSG00000137575 | syndecan binding protein (syntenin) [Source:HGNC Symbol;Acc:10662]                 | -1.08 | 5.8E-10 |
| CSF1     | ENSG00000184371 | colony stimulating factor 1 (macrophage) [Source:HGNC Symbol;Acc:2432]             | -1.36 | 5.9E-10 |
| C12orf49 | ENSG00000111412 | chromosome 12 open reading frame 49 [Source:HGNC Symbol;Acc:26128]                 | -0.93 | 6.2E-10 |
| --       | ENSG00000272720 | --                                                                                 | -1.55 | 6.3E-10 |
| MAP7D1   | ENSG00000116871 | MAP7 domain containing 1 [Source:HGNC Symbol;Acc:25514]                            | -1.19 | 6.3E-10 |
| --       | ENSG00000271828 | --                                                                                 | -1.78 | 6.4E-10 |
| OSGIN1   | ENSG00000140961 | oxidative stress induced growth inhibitor 1 [Source:HGNC Symbol;Acc:30093]         | -1.63 | 6.5E-10 |
| MEF2A    | ENSG00000068305 | myocyte enhancer factor 2A [Source:HGNC Symbol;Acc:6993]                           | -1.13 | 6.8E-10 |
| RAB4B    | ENSG00000167578 | RAB4B, member RAS oncogene family [Source:HGNC Symbol;Acc:9782]                    | -1.61 | 6.9E-10 |
| THBS1    | ENSG00000137801 | thrombospondin 1 [Source:HGNC Symbol;Acc:11785]                                    | -1.48 | 6.9E-10 |
| C12orf75 | ENSG00000235162 | chromosome 12 open reading frame 75 [Source:HGNC Symbol;Acc:35164]                 | -0.73 | 7.0E-10 |
| CAPN1    | ENSG00000014216 | calpain 1, (mu/l) large subunit [Source:HGNC Symbol;Acc:1476]                      | -1.18 | 7.1E-10 |
| SPNS2    | ENSG00000183018 | spinster homolog 2 (Drosophila) [Source:HGNC Symbol;Acc:26992]                     | -1.12 | 7.2E-10 |
| MAP4K4   | ENSG00000071054 | mitogen-activated protein kinase kinase kinase 4 [Source:HGNC Symbol;Acc:6866]     | -1.11 | 7.2E-10 |
| SFTA2    | ENSG00000196260 | surfactant associated 2 [Source:HGNC Symbol;Acc:18386]                             | -1.24 | 7.2E-10 |
| VPS9D1   | ENSG00000075399 | VPS9 domain containing 1 [Source:HGNC Symbol;Acc:13526]                            | -1.48 | 7.4E-10 |
| TFCP2L1  | ENSG00000115112 | transcription factor CP2-like 1 [Source:HGNC Symbol;Acc:17925]                     | -0.96 | 7.5E-10 |
| HLA-A    | ENSG00000206503 | major histocompatibility complex, class I, A [Source:HGNC Symbol;Acc:4931]         | -1.07 | 7.7E-10 |

|            |                 |                                                                                                 |       |         |
|------------|-----------------|-------------------------------------------------------------------------------------------------|-------|---------|
| MAL2       | ENSG00000147676 | mal, T-cell differentiation protein 2 (gene/pseudogene) [Source:HGNC Symbol;Acc:13634]          | -1.07 | 7.8E-10 |
| TSPAN8     | ENSG00000127324 | tetraspanin 8 [Source:HGNC Symbol;Acc:11855]                                                    | -1.09 | 7.9E-10 |
| DAPK2      | ENSG00000035664 | death-associated protein kinase 2 [Source:HGNC Symbol;Acc:2675]                                 | -1.03 | 7.9E-10 |
| --         | ENSG00000267607 | --                                                                                              | -1.67 | 7.9E-10 |
| WNT2B      | ENSG00000134245 | wingless-type MMTV integration site family, member 2B [Source:HGNC Symbol;Acc:12781]            | -1.11 | 8.0E-10 |
| ZSWIM6     | ENSG00000130449 | zinc finger, SWIM-type containing 6 [Source:HGNC Symbol;Acc:29316]                              | -1.09 | 8.3E-10 |
| CDC42EP5   | ENSG00000167617 | CDC42 effector protein (Rho GTPase binding) 5 [Source:HGNC Symbol;Acc:17408]                    | -1.75 | 8.6E-10 |
| SRI        | ENSG00000075142 | sorcini [Source:HGNC Symbol;Acc:11292]                                                          | -0.91 | 8.7E-10 |
| --         | ENSG00000257671 | --                                                                                              | -1.46 | 8.8E-10 |
| FAM13A-AS1 | ENSG00000248019 | FAM13A antisense RNA 1 [Source:HGNC Symbol;Acc:19370]                                           | -1.11 | 8.8E-10 |
| --         | ENSG00000267344 | --                                                                                              | -1.52 | 8.9E-10 |
| --         | ENSG00000225205 | --                                                                                              | -1.35 | 8.9E-10 |
| LMTK2      | ENSG00000164715 | lemur tyrosine kinase 2 [Source:HGNC Symbol;Acc:17880]                                          | -0.83 | 8.9E-10 |
| LYPD3      | ENSG00000124466 | LY6/PLAUR domain containing 3 [Source:HGNC Symbol;Acc:24880]                                    | -1.69 | 8.9E-10 |
| TMEM139    | ENSG00000178826 | transmembrane protein 139 [Source:HGNC Symbol;Acc:22058]                                        | -1.02 | 9.1E-10 |
| LGALS4     | ENSG00000171747 | lectin, galactoside-binding, soluble, 4 [Source:HGNC Symbol;Acc:6565]                           | -0.99 | 9.6E-10 |
| TTC39B     | ENSG00000155158 | tetratricopeptide repeat domain 39B [Source:HGNC Symbol;Acc:23704]                              | -1.23 | 9.6E-10 |
| CASZ1      | ENSG00000130940 | castor zinc finger 1 [Source:HGNC Symbol;Acc:26002]                                             | -1.06 | 1.0E-09 |
| --         | ENSG00000245293 | --                                                                                              | -1.61 | 1.0E-09 |
| MST1R      | ENSG00000164078 | macrophage stimulating 1 receptor (c-met-related tyrosine kinase) [Source:HGNC Symbol;Acc:7381] | -1.24 | 1.1E-09 |
| RHBDL2     | ENSG00000158315 | rhomboid, veinlet-like 2 (Drosophila) [Source:HGNC Symbol;Acc:16083]                            | -1.04 | 1.1E-09 |



|         |                 |                                                                                                  |       |         |
|---------|-----------------|--------------------------------------------------------------------------------------------------|-------|---------|
| ITGA6   | ENSG00000091409 | integrin, alpha 6 [Source:HGNC Symbol;Acc:6142]                                                  | -1.18 | 1.1E-09 |
| NAT1    | ENSG00000171428 | N-acetyltransferase 1 (arylamine N-acetyltransferase) [Source:HGNC Symbol;Acc:7645]              | -1.17 | 1.1E-09 |
| MMP1    | ENSG00000196611 | matrix metalloproteinase 1 (interstitial collagenase) [Source:HGNC Symbol;Acc:7155]              | -2.03 | 1.1E-09 |
| FAM102A | ENSG00000167106 | family with sequence similarity 102, member A [Source:HGNC Symbol;Acc:31419]                     | -0.94 | 1.2E-09 |
| AP1B1   | ENSG00000100280 | adaptor-related protein complex 1, beta 1 subunit [Source:HGNC Symbol;Acc:554]                   | -1.10 | 1.2E-09 |
| SLC6A12 | ENSG00000111181 | solute carrier family 6 (neurotransmitter transporter), member 12 [Source:HGNC Symbol;Acc:11045] | -2.13 | 1.2E-09 |
| KCTD11  | ENSG00000213859 | potassium channel tetramerization domain containing 11 [Source:HGNC Symbol;Acc:21302]            | -1.28 | 1.2E-09 |
| --      | ENSG00000268965 | Uncharacterized protein [Source:UniProtKB/TrEMBL;Acc:M0R270]                                     | -2.22 | 1.2E-09 |
| MVP     | ENSG00000013364 | major vault protein [Source:HGNC Symbol;Acc:7531]                                                | -1.35 | 1.3E-09 |
| PTPRE   | ENSG00000132334 | protein tyrosine phosphatase, receptor type, E [Source:HGNC Symbol;Acc:9669]                     | -1.02 | 1.3E-09 |
| CREB3   | ENSG00000107175 | cAMP responsive element binding protein 3 [Source:HGNC Symbol;Acc:2347]                          | -0.88 | 1.3E-09 |
| SMIM22  | ENSG00000267795 | small integral membrane protein 22 [Source:HGNC Symbol;Acc:48329]                                | -1.45 | 1.3E-09 |
| USP43   | ENSG00000154914 | ubiquitin specific peptidase 43 [Source:HGNC Symbol;Acc:20072]                                   | -0.87 | 1.3E-09 |
| IL6R    | ENSG00000160712 | interleukin 6 receptor [Source:HGNC Symbol;Acc:6019]                                             | -1.08 | 1.3E-09 |
| HECA    | ENSG00000112406 | headcase homolog (Drosophila) [Source:HGNC Symbol;Acc:21041]                                     | -1.05 | 1.3E-09 |
| OBFC1   | ENSG00000107960 | oligonucleotide/oligosaccharide-binding fold containing 1 [Source:HGNC Symbol;Acc:26200]         | -0.89 | 1.3E-09 |
| LRRFIP2 | ENSG00000093167 | leucine rich repeat (in FLII) interacting protein 2 [Source:HGNC Symbol;Acc:6703]                | -0.77 | 1.4E-09 |
| SERTAD3 | ENSG00000167565 | SERTA domain containing 3 [Source:HGNC Symbol;Acc:17931]                                         | -1.02 | 1.4E-09 |

|            |                 |                                                                                                               |       |         |
|------------|-----------------|---------------------------------------------------------------------------------------------------------------|-------|---------|
| SLC22A18AS | ENSG00000254827 | solute carrier family 22 (organic cation transporter), member 18 antisense [Source:HGNC Symbol;Acc:10965]     | -1.17 | 1.4E-09 |
| PINK1-AS   | ENSG00000117242 | PINK1 antisense RNA [Source:HGNC Symbol;Acc:38872]                                                            | -1.01 | 1.5E-09 |
| MIR210HG   | ENSG00000247095 | MIR210 host gene (non-protein coding) [Source:HGNC Symbol;Acc:39524]                                          | -1.68 | 1.5E-09 |
| NFKB2      | ENSG00000077150 | nuclear factor of kappa light polypeptide gene enhancer in B-cells 2 (p49/p100) [Source:HGNC Symbol;Acc:7795] | -1.48 | 1.5E-09 |
| TES        | ENSG00000135269 | testis derived transcript (3 LIM domains) [Source:HGNC Symbol;Acc:14620]                                      | -1.07 | 1.5E-09 |
| DPP4       | ENSG00000197635 | dipeptidyl-peptidase 4 [Source:HGNC Symbol;Acc:3009]                                                          | -0.85 | 1.5E-09 |
| --         | ENSG00000224721 | --                                                                                                            | -1.88 | 1.5E-09 |
| GPA33      | ENSG00000143167 | glycoprotein A33 (transmembrane) [Source:HGNC Symbol;Acc:4445]                                                | -1.20 | 1.5E-09 |
| VSIG10     | ENSG00000176834 | V-set and immunoglobulin domain containing 10 [Source:HGNC Symbol;Acc:26078]                                  | -0.86 | 1.6E-09 |
| PHLDA3     | ENSG00000174307 | pleckstrin homology-like domain, family A, member 3 [Source:HGNC Symbol;Acc:8934]                             | -1.50 | 1.6E-09 |
| LINC01133  | ENSG00000224259 | long intergenic non-protein coding RNA 1133 [Source:HGNC Symbol;Acc:49447]                                    | -1.46 | 1.6E-09 |
| TMEM82     | ENSG00000162460 | transmembrane protein 82 [Source:HGNC Symbol;Acc:32350]                                                       | -1.86 | 1.6E-09 |
| ATP10B     | ENSG00000118322 | ATPase, class V, type 10B [Source:HGNC Symbol;Acc:13543]                                                      | -0.90 | 1.7E-09 |
| MEP1A      | ENSG00000112818 | meprin A, alpha (PABA peptide hydrolase) [Source:HGNC Symbol;Acc:7015]                                        | -1.31 | 1.7E-09 |
| CASC19     | ENSG00000254166 | cancer susceptibility candidate 19 (non-protein coding) [Source:HGNC Symbol;Acc:49476]                        | -1.55 | 1.7E-09 |
| KRT16      | ENSG00000186832 | keratin 16 [Source:HGNC Symbol;Acc:6423]                                                                      | -1.39 | 1.7E-09 |
| CHD2       | ENSG00000173575 | chromodomain helicase DNA binding protein 2 [Source:HGNC Symbol;Acc:1917]                                     | -0.74 | 1.7E-09 |
| --         | ENSG00000188971 | --                                                                                                            | -1.10 | 1.7E-09 |
| HEBP2      | ENSG00000051620 | heme binding protein 2 [Source:HGNC Symbol;Acc:15716]                                                         | -0.86 | 1.8E-09 |

|           |                 |                                                                                                                                     |       |         |
|-----------|-----------------|-------------------------------------------------------------------------------------------------------------------------------------|-------|---------|
| FEM1B     | ENSG00000169018 | fem-1 homolog b (C. elegans) [Source:HGNC Symbol;Acc:3649]<br>protein kinase, AMP-activated, gamma 2 non-catalytic subunit          | -1.08 | 1.8E-09 |
| PRKAG2    | ENSG00000106617 | [Source:HGNC Symbol;Acc:9386]                                                                                                       | -1.01 | 1.8E-09 |
| PRR13     | ENSG00000205352 | proline rich 13 [Source:HGNC Symbol;Acc:24528]<br>RAS and EF-hand domain containing [Source:HGNC                                    | -0.82 | 1.8E-09 |
| RASEF     | ENSG00000165105 | Symbol;Acc:26464]<br>GIPC PDZ domain containing family, member 1 [Source:HGNC                                                       | -1.10 | 1.8E-09 |
| GIPC1     | ENSG00000123159 | Symbol;Acc:1226]<br>chromosome 8 open reading frame 4 [Source:HGNC                                                                  | -1.35 | 1.9E-09 |
| C8orf4    | ENSG00000176907 | Symbol;Acc:1357]<br>HLA complex group 4 pseudogene 11 [Source:HGNC                                                                  | -1.34 | 1.9E-09 |
| HCG4P11   | ENSG00000225864 | Symbol;Acc:22930]                                                                                                                   | -1.55 | 1.9E-09 |
| KSR1      | ENSG00000141068 | kinase suppressor of ras 1 [Source:HGNC Symbol;Acc:6465]<br>zinc finger and BTB domain containing 7A [Source:HGNC                   | -0.91 | 1.9E-09 |
| ZBTB7A    | ENSG00000178951 | Symbol;Acc:18078]<br>solute carrier family 25 (mitochondrial carrier; phosphate carrier),                                           | -0.88 | 2.0E-09 |
| SLC25A25  | ENSG00000148339 | member 25 [Source:HGNC Symbol;Acc:20663]<br>inositol polyphosphate-5-phosphatase F [Source:HGNC                                     | -1.09 | 2.0E-09 |
| INPP5F    | ENSG00000198825 | Symbol;Acc:17054]                                                                                                                   | -0.95 | 2.1E-09 |
| VIPR1-AS1 | ENSG00000232354 | VIPR1 antisense RNA 1 [Source:HGNC Symbol;Acc:40610]<br>leucine rich repeat (in FLII) interacting protein 1 [Source:HGNC            | -1.36 | 2.1E-09 |
| LRRFIP1   | ENSG00000124831 | Symbol;Acc:6702]<br>Rho guanine nucleotide exchange factor (GEF) 11 [Source:HGNC                                                    | -1.04 | 2.1E-09 |
| ARHGEF11  | ENSG00000132694 | Symbol;Acc:14580]                                                                                                                   | -0.97 | 2.1E-09 |
| RTCA      | ENSG00000137996 | RNA 3'-terminal phosphate cyclase [Source:HGNC Symbol;Acc:17981]<br>Rho/Rac guanine nucleotide exchange factor (GEF) 2 [Source:HGNC | -0.87 | 2.1E-09 |
| ARHGEF2   | ENSG00000116584 | Symbol;Acc:682]                                                                                                                     | -0.99 | 2.2E-09 |
| ABI2      | ENSG00000138443 | abl-interactor 2 [Source:HGNC Symbol;Acc:24011]                                                                                     | -0.90 | 2.2E-09 |

|          |                 |                                                                                                                 |       |         |
|----------|-----------------|-----------------------------------------------------------------------------------------------------------------|-------|---------|
| MAFG     | ENSG00000197063 | v-maf avian musculoaponeurotic fibrosarcoma oncogene homolog G<br>[Source:HGNC Symbol;Acc:6781]                 | -1.11 | 2.2E-09 |
| --       | ENSG00000267322 | --                                                                                                              | -1.24 | 2.2E-09 |
| PSORS1C3 | ENSG00000204528 | psoriasis susceptibility 1 candidate 3 (non-protein coding)<br>[Source:HGNC Symbol;Acc:17203]                   | -1.34 | 2.3E-09 |
| IFRD1    | ENSG00000006652 | interferon-related developmental regulator 1 [Source:HGNC<br>Symbol;Acc:5456]                                   | -0.91 | 2.3E-09 |
| DENND1B  | ENSG00000213047 | DENN/MADD domain containing 1B [Source:HGNC<br>Symbol;Acc:28404]                                                | -1.32 | 2.3E-09 |
| --       | ENSG00000267077 | --                                                                                                              | -1.37 | 2.4E-09 |
| ARTN     | ENSG00000117407 | artemin [Source:HGNC Symbol;Acc:727]                                                                            | -2.25 | 2.4E-09 |
| PRRG2    | ENSG00000126460 | proline rich Gla (G-carboxyglutamic acid) 2 [Source:HGNC<br>Symbol;Acc:9470]                                    | -1.26 | 2.4E-09 |
| UQCC2    | ENSG00000137288 | ubiquinol-cytochrome c reductase complex assembly factor 2<br>[Source:HGNC Symbol;Acc:21237]                    | -1.15 | 2.6E-09 |
| YPEL3    | ENSG00000090238 | yippee-like 3 (Drosophila) [Source:HGNC Symbol;Acc:18327]                                                       | -1.46 | 2.6E-09 |
| SLC41A2  | ENSG00000136052 | solute carrier family 41 (magnesium transporter), member 2<br>[Source:HGNC Symbol;Acc:31045]                    | -1.20 | 2.6E-09 |
| MOB3C    | ENSG00000142961 | MOB kinase activator 3C [Source:HGNC Symbol;Acc:29800]                                                          | -1.05 | 2.6E-09 |
| ILK      | ENSG00000166333 | integrin-linked kinase [Source:HGNC Symbol;Acc:6040]                                                            | -0.76 | 2.7E-09 |
| PLEKHG6  | ENSG00000008323 | pleckstrin homology domain containing, family G (with RhoGef<br>domain) member 6 [Source:HGNC Symbol;Acc:25562] | -1.16 | 2.7E-09 |
| RWDD2A   | ENSG00000013392 | RWD domain containing 2A [Source:HGNC Symbol;Acc:21385]                                                         | -0.97 | 2.8E-09 |
| PERP     | ENSG00000112378 | PERP, TP53 apoptosis effector [Source:HGNC Symbol;Acc:17637]                                                    | -1.00 | 2.8E-09 |
| MOB3A    | ENSG00000172081 | MOB kinase activator 3A [Source:HGNC Symbol;Acc:29802]                                                          | -0.95 | 2.8E-09 |
| MS4A12   | ENSG00000071203 | membrane-spanning 4-domains, subfamily A, member 12<br>[Source:HGNC Symbol;Acc:13370]                           | -2.90 | 2.8E-09 |
| TINF2    | ENSG00000092330 | TERF1 (TRF1)-interacting nuclear factor 2 [Source:HGNC<br>Symbol;Acc:11824]                                     | -0.87 | 2.8E-09 |

|         |                 |                                                                                                |       |         |
|---------|-----------------|------------------------------------------------------------------------------------------------|-------|---------|
| TFF1    | ENSG00000160182 | trefoil factor 1 [Source:HGNC Symbol;Acc:11755]                                                | -1.49 | 2.9E-09 |
| URGCP   | ENSG00000106608 | upregulator of cell proliferation [Source:HGNC Symbol;Acc:30890]                               | -1.06 | 2.9E-09 |
| HRH1    | ENSG00000196639 | histamine receptor H1 [Source:HGNC Symbol;Acc:5182]                                            | -1.04 | 2.9E-09 |
| PTPRJ   | ENSG00000149177 | protein tyrosine phosphatase, receptor type, J [Source:HGNC Symbol;Acc:9673]                   | -1.23 | 3.0E-09 |
| --      | ENSG00000266341 | --                                                                                             | -1.14 | 3.1E-09 |
| GUCD1   | ENSG00000138867 | guanylyl cyclase domain containing 1 [Source:HGNC Symbol;Acc:14237]                            | -0.86 | 3.1E-09 |
| CAB39   | ENSG00000135932 | calcium binding protein 39 [Source:HGNC Symbol;Acc:20292]                                      | -1.22 | 3.1E-09 |
| FER1L4  | ENSG00000088340 | fer-1-like 4 (C. elegans), pseudogene [Source:HGNC Symbol;Acc:15801]                           | -1.37 | 3.2E-09 |
| --      | ENSG00000255404 | --                                                                                             | -0.93 | 3.3E-09 |
| LDHA    | ENSG00000134333 | lactate dehydrogenase A [Source:HGNC Symbol;Acc:6535]                                          | -0.93 | 3.3E-09 |
| --      | ENSG00000234678 | --                                                                                             | -1.12 | 3.4E-09 |
| FAM129B | ENSG00000136830 | family with sequence similarity 129, member B [Source:HGNC Symbol;Acc:25282]                   | -1.18 | 3.4E-09 |
| TRAK1   | ENSG00000182606 | trafficking protein, kinesin binding 1 [Source:HGNC Symbol;Acc:29947]                          | -0.72 | 3.4E-09 |
| AKR1B15 | ENSG00000227471 | aldo-keto reductase family 1, member B15 [Source:HGNC Symbol;Acc:37281]                        | -2.76 | 3.5E-09 |
| OS9     | ENSG00000135506 | osteosarcoma amplified 9, endoplasmic reticulum lectin [Source:HGNC Symbol;Acc:16994]          | -0.91 | 3.5E-09 |
| ITGA2   | ENSG00000164171 | integrin, alpha 2 (CD49B, alpha 2 subunit of VLA-2 receptor) [Source:HGNC Symbol;Acc:6137]     | -1.52 | 3.5E-09 |
| ZCCHC6  | ENSG00000083223 | zinc finger, CCHC domain containing 6 [Source:HGNC Symbol;Acc:25817]                           | -1.02 | 3.6E-09 |
| SLC22A3 | ENSG00000146477 | solute carrier family 22 (organic cation transporter), member 3 [Source:HGNC Symbol;Acc:10967] | -1.00 | 3.7E-09 |
| SFN     | ENSG00000175793 | stratifin [Source:HGNC Symbol;Acc:10773]                                                       | -1.40 | 3.7E-09 |

|          |                 |                                                                                                                 |       |         |
|----------|-----------------|-----------------------------------------------------------------------------------------------------------------|-------|---------|
| MYO1A    | ENSG00000166866 | myosin IA [Source:HGNC Symbol;Acc:7595]                                                                         | -0.81 | 3.7E-09 |
| ELF4     | ENSG00000102034 | E74-like factor 4 (ets domain transcription factor) [Source:HGNC Symbol;Acc:3319]                               | -0.79 | 3.7E-09 |
| SLC16A3  | ENSG00000141526 | solute carrier family 16 (monocarboxylate transporter), member 3 [Source:HGNC Symbol;Acc:10924]                 | -1.34 | 3.7E-09 |
| --       | ENSG00000257390 | Uncharacterized protein [Source:UniProtKB/TrEMBL;Acc:H0YHH1]                                                    | -1.09 | 3.7E-09 |
| TMEM217  | ENSG00000172738 | transmembrane protein 217 [Source:HGNC Symbol;Acc:21238]                                                        | -1.54 | 3.8E-09 |
| PRELID2  | ENSG00000186314 | PRELI domain containing 2 [Source:HGNC Symbol;Acc:28306]                                                        | -0.94 | 3.8E-09 |
| ALDOA    | ENSG00000149925 | aldolase A, fructose-bisphosphate [Source:HGNC Symbol;Acc:414]                                                  | -1.24 | 3.8E-09 |
| MIEF2    | ENSG00000177427 | mitochondrial elongation factor 2 [Source:HGNC Symbol;Acc:17920]                                                | -1.40 | 3.8E-09 |
| CXADR    | ENSG00000154639 | coxsackie virus and adenovirus receptor [Source:HGNC Symbol;Acc:2559]                                           | -1.26 | 3.9E-09 |
| TAP1     | ENSG00000168394 | transporter 1, ATP-binding cassette, sub-family B (MDR/TAP) [Source:HGNC Symbol;Acc:43]                         | -0.87 | 3.9E-09 |
| DUSP3    | ENSG00000108861 | dual specificity phosphatase 3 [Source:HGNC Symbol;Acc:3069]                                                    | -0.75 | 3.9E-09 |
| CHMP1B   | ENSG00000255112 | charged multivesicular body protein 1B [Source:HGNC Symbol;Acc:24287]                                           | -0.92 | 4.0E-09 |
| WFDC5    | ENSG00000175121 | WAP four-disulfide core domain 5 [Source:HGNC Symbol;Acc:20477]                                                 | -2.02 | 4.0E-09 |
| SNRK-AS1 | ENSG00000234617 | SNRK antisense RNA 1 [Source:HGNC Symbol;Acc:41269]                                                             | -1.51 | 4.0E-09 |
| GPR126   | ENSG00000112414 | G protein-coupled receptor 126 [Source:HGNC Symbol;Acc:13841]                                                   | -1.43 | 4.0E-09 |
| PRSS36   | ENSG00000178226 | protease, serine, 36 [Source:HGNC Symbol;Acc:26906]                                                             | -1.58 | 4.1E-09 |
| CLN8     | ENSG00000182372 | ceroid-lipofuscinosis, neuronal 8 (epilepsy, progressive with mental retardation) [Source:HGNC Symbol;Acc:2079] | -0.91 | 4.1E-09 |
| ZNF160   | ENSG00000170949 | zinc finger protein 160 [Source:HGNC Symbol;Acc:12948]                                                          | -1.06 | 4.2E-09 |
| PCSK7    | ENSG00000160613 | proprotein convertase subtilisin/kexin type 7 [Source:HGNC Symbol;Acc:8748]                                     | -1.00 | 4.3E-09 |
| TLDC2    | ENSG00000101342 | TBC/LysM-associated domain containing 2 [Source:HGNC Symbol;Acc:16112]                                          | -0.72 | 4.3E-09 |
| --       | ENSG00000233554 | --                                                                                                              | -1.64 | 4.4E-09 |

|         |                 |                                                                                                                    |       |         |
|---------|-----------------|--------------------------------------------------------------------------------------------------------------------|-------|---------|
| CHP1    | ENSG00000187446 | calcineurin-like EF-hand protein 1 [Source:HGNC Symbol;Acc:17433]                                                  | -0.77 | 4.4E-09 |
| OPN3    | ENSG00000054277 | opsin 3 [Source:HGNC Symbol;Acc:14007]                                                                             | -1.18 | 4.4E-09 |
| TSPAN14 | ENSG00000108219 | tetraspanin 14 [Source:HGNC Symbol;Acc:23303]                                                                      | -0.91 | 4.5E-09 |
| SYNPO2L | ENSG00000166317 | synaptopodin 2-like [Source:HGNC Symbol;Acc:23532]                                                                 | -4.04 | 4.5E-09 |
| JAK1    | ENSG00000162434 | Janus kinase 1 [Source:HGNC Symbol;Acc:6190]                                                                       | -0.94 | 4.5E-09 |
| STX19   | ENSG00000178750 | syntaxin 19 [Source:HGNC Symbol;Acc:19300]                                                                         | -1.24 | 4.5E-09 |
| ARAP2   | ENSG00000047365 | ArfGAP with RhoGAP domain, ankyrin repeat and PH domain 2 [Source:HGNC Symbol;Acc:16924]                           | -1.25 | 4.6E-09 |
| BCL6    | ENSG00000113916 | B-cell CLL/lymphoma 6 [Source:HGNC Symbol;Acc:1001]                                                                | -0.96 | 4.7E-09 |
| CRAT    | ENSG00000095321 | carnitine O-acetyltransferase [Source:HGNC Symbol;Acc:2342]                                                        | -1.00 | 4.8E-09 |
| --      | ENSG00000230438 | --                                                                                                                 | -1.76 | 4.9E-09 |
| SEC14L2 | ENSG00000100003 | SEC14-like 2 ( <i>S. cerevisiae</i> ) [Source:HGNC Symbol;Acc:10699]                                               | -1.18 | 4.9E-09 |
| --      | ENSG00000273328 | --                                                                                                                 | -2.62 | 5.0E-09 |
| MAST3   | ENSG00000099308 | microtubule associated serine/threonine kinase 3 [Source:HGNC Symbol;Acc:19036]                                    | -1.19 | 5.1E-09 |
| OVOL1   | ENSG00000172818 | ovo-like zinc finger 1 [Source:HGNC Symbol;Acc:8525]                                                               | -1.02 | 5.2E-09 |
| SYTL5   | ENSG00000147041 | synaptotagmin-like 5 [Source:HGNC Symbol;Acc:15589]                                                                | -1.66 | 5.4E-09 |
| --      | ENSG00000267804 | --                                                                                                                 | -1.28 | 5.5E-09 |
| RAB22A  | ENSG00000124209 | RAB22A, member RAS oncogene family [Source:HGNC Symbol;Acc:9764]                                                   | -0.92 | 5.5E-09 |
| GBP1    | ENSG00000117228 | guanylate binding protein 1, interferon-inducible [Source:HGNC Symbol;Acc:4182]                                    | -1.24 | 5.6E-09 |
| CTDSP2  | ENSG00000175215 | CTD (carboxy-terminal domain, RNA polymerase II, polypeptide A) small phosphatase 2 [Source:HGNC Symbol;Acc:17077] | -0.81 | 5.6E-09 |
| CFB     | ENSG00000243649 | complement factor B [Source:HGNC Symbol;Acc:1037]                                                                  | -1.47 | 5.6E-09 |
| SOWAHC  | ENSG00000198142 | sosondowah ankyrin repeat domain family member C [Source:HGNC Symbol;Acc:26149]                                    | -1.25 | 5.6E-09 |
| ZNF821  | ENSG00000102984 | zinc finger protein 821 [Source:HGNC Symbol;Acc:28043]                                                             | -1.41 | 5.6E-09 |

|         |                 |                                                                                                                 |       |         |
|---------|-----------------|-----------------------------------------------------------------------------------------------------------------|-------|---------|
| VPS28   | ENSG00000160948 | vacuolar protein sorting 28 homolog ( <i>S. cerevisiae</i> ) [Source:HGNC Symbol;Acc:18178]                     | -1.29 | 5.9E-09 |
| RELB    | ENSG00000104856 | v-rel avian reticuloendotheliosis viral oncogene homolog B [Source:HGNC Symbol;Acc:9956]                        | -1.45 | 6.0E-09 |
| ANXA1   | ENSG00000135046 | annexin A1 [Source:HGNC Symbol;Acc:533]                                                                         | -1.10 | 6.0E-09 |
| VASP    | ENSG00000125753 | vasodilator-stimulated phosphoprotein [Source:HGNC Symbol;Acc:12652]                                            | -0.95 | 6.1E-09 |
| TPD52L2 | ENSG00000101150 | tumor protein D52-like 2 [Source:HGNC Symbol;Acc:12007]                                                         | -0.86 | 6.1E-09 |
| DAB2IP  | ENSG00000136848 | DAB2 interacting protein [Source:HGNC Symbol;Acc:17294]                                                         | -0.91 | 6.1E-09 |
| ZBTB46  | ENSG00000130584 | zinc finger and BTB domain containing 46 [Source:HGNC Symbol;Acc:16094]                                         | -1.13 | 6.1E-09 |
| CCNDBP1 | ENSG00000166946 | cyclin D-type binding-protein 1 [Source:HGNC Symbol;Acc:1587]                                                   | -0.96 | 6.4E-09 |
| HBP1    | ENSG00000105856 | HMG-box transcription factor 1 [Source:HGNC Symbol;Acc:23200]                                                   | -1.06 | 6.8E-09 |
| CC2D1B  | ENSG00000154222 | coiled-coil and C2 domain containing 1B [Source:HGNC Symbol;Acc:29386]                                          | -0.92 | 7.0E-09 |
| GNA11   | ENSG00000088256 | guanine nucleotide binding protein (G protein), alpha 11 (Gq class) [Source:HGNC Symbol;Acc:4379]               | -1.24 | 7.1E-09 |
| --      | ENSG00000268427 | Uncharacterized protein [Source:UniProtKB/TrEMBL;Acc:M0QZK9]                                                    | -1.48 | 7.2E-09 |
| C7orf43 | ENSG00000146826 | chromosome 7 open reading frame 43 [Source:HGNC Symbol;Acc:25604]                                               | -1.26 | 7.5E-09 |
| PTP4A1  | ENSG00000112245 | protein tyrosine phosphatase type IVA, member 1 [Source:HGNC Symbol;Acc:9634]                                   | -1.06 | 7.5E-09 |
| TSG101  | ENSG00000074319 | tumor susceptibility 101 [Source:HGNC Symbol;Acc:15971]                                                         | -0.83 | 7.5E-09 |
| RNF10   | ENSG00000022840 | ring finger protein 10 [Source:HGNC Symbol;Acc:10055]                                                           | -0.65 | 7.5E-09 |
| FABP3   | ENSG00000121769 | fatty acid binding protein 3, muscle and heart (mammary-derived growth inhibitor) [Source:HGNC Symbol;Acc:3557] | -1.69 | 7.6E-09 |
| GNA13   | ENSG00000120063 | guanine nucleotide binding protein (G protein), alpha 13 [Source:HGNC Symbol;Acc:4381]                          | -1.21 | 7.6E-09 |



|         |                 |                                                                                                                     |       |         |
|---------|-----------------|---------------------------------------------------------------------------------------------------------------------|-------|---------|
| SWAP70  | ENSG00000133789 | SWAP switching B-cell complex 70kDa subunit [Source:HGNC Symbol;Acc:17070]                                          | -1.03 | 7.8E-09 |
| HSPG2   | ENSG00000142798 | heparan sulfate proteoglycan 2 [Source:HGNC Symbol;Acc:5273]                                                        | -1.16 | 7.8E-09 |
| CHIC2   | ENSG00000109220 | cysteine-rich hydrophobic domain 2 [Source:HGNC Symbol;Acc:1935]                                                    | -1.07 | 7.8E-09 |
| GTPBP1  | ENSG00000100226 | GTP binding protein 1 [Source:HGNC Symbol;Acc:4669]                                                                 | -1.18 | 7.9E-09 |
| IL13RA1 | ENSG00000131724 | interleukin 13 receptor, alpha 1 [Source:HGNC Symbol;Acc:5974]                                                      | -0.90 | 8.2E-09 |
| --      | ENSG00000235523 | --                                                                                                                  | -2.63 | 8.2E-09 |
| TAP2    | ENSG00000204267 | transporter 2, ATP-binding cassette, sub-family B (MDR/TAP) [Source:HGNC Symbol;Acc:44]                             | -0.82 | 8.2E-09 |
| YIPF3   | ENSG00000137207 | Yip1 domain family, member 3 [Source:HGNC Symbol;Acc:21023]                                                         | -0.88 | 8.4E-09 |
| CCDC153 | ENSG00000248712 | coiled-coil domain containing 153 [Source:HGNC Symbol;Acc:27446]                                                    | -1.31 | 8.5E-09 |
| --      | ENSG00000270403 | --                                                                                                                  | -2.26 | 8.8E-09 |
| ELMSAN1 | ENSG00000156030 | ELM2 and Myb/SANT-like domain containing 1 [Source:HGNC Symbol;Acc:19853]                                           | -0.95 | 8.8E-09 |
| PDLIM1  | ENSG00000107438 | PDZ and LIM domain 1 [Source:HGNC Symbol;Acc:2067]                                                                  | -0.67 | 8.9E-09 |
| SH2D3A  | ENSG00000125731 | SH2 domain containing 3A [Source:HGNC Symbol;Acc:16885]                                                             | -1.30 | 9.0E-09 |
| LRRC66  | ENSG00000188993 | leucine rich repeat containing 66 [Source:HGNC Symbol;Acc:34299]                                                    | -1.66 | 9.0E-09 |
| --      | ENSG00000263171 | --                                                                                                                  | -1.40 | 9.1E-09 |
| ATP1B1  | ENSG00000143153 | ATPase, Na <sup>+</sup> /K <sup>+</sup> transporting, beta 1 polypeptide [Source:HGNC Symbol;Acc:804]               | -1.11 | 9.1E-09 |
| LIF     | ENSG00000128342 | leukemia inhibitory factor [Source:HGNC Symbol;Acc:6596]                                                            | -1.20 | 9.3E-09 |
| CXCL17  | ENSG00000189377 | chemokine (C-X-C motif) ligand 17 [Source:HGNC Symbol;Acc:19232]                                                    | -1.27 | 9.4E-09 |
| SYNRG   | ENSG00000006114 | synergin, gamma [Source:HGNC Symbol;Acc:557]                                                                        | -0.96 | 9.4E-09 |
| HPCA    | ENSG00000121905 | hippocalcin [Source:HGNC Symbol;Acc:5144]                                                                           | -1.44 | 9.7E-09 |
| EIF6    | ENSG00000242372 | eukaryotic translation initiation factor 6 [Source:HGNC Symbol;Acc:6159]                                            | -0.91 | 1.0E-08 |
| NFKBIE  | ENSG00000146232 | nuclear factor of kappa light polypeptide gene enhancer in B-cells inhibitor, epsilon [Source:HGNC Symbol;Acc:7799] | -1.30 | 1.0E-08 |

|          |                 |                                                                                                 |       |         |
|----------|-----------------|-------------------------------------------------------------------------------------------------|-------|---------|
| ZC3H12C  | ENSG00000149289 | zinc finger CCCH-type containing 12C [Source:HGNC Symbol;Acc:29362]                             | -1.26 | 1.0E-08 |
| STAT5A   | ENSG00000126561 | signal transducer and activator of transcription 5A [Source:HGNC Symbol;Acc:11366]              | -1.16 | 1.0E-08 |
| TCN2     | ENSG00000185339 | transcobalamin II [Source:HGNC Symbol;Acc:11653]                                                | -1.16 | 1.0E-08 |
| CALR     | ENSG00000179218 | calreticulin [Source:HGNC Symbol;Acc:1455]                                                      | -0.76 | 1.0E-08 |
| FRMD4B   | ENSG00000114541 | FERM domain containing 4B [Source:HGNC Symbol;Acc:24886]                                        | -1.04 | 1.0E-08 |
| PNMA1    | ENSG00000176903 | paraneoplastic Ma antigen 1 [Source:HGNC Symbol;Acc:9158]                                       | -0.88 | 1.1E-08 |
| TJP1     | ENSG00000104067 | tight junction protein 1 [Source:HGNC Symbol;Acc:11827]                                         | -0.92 | 1.1E-08 |
| CLIP1    | ENSG00000130779 | CAP-GLY domain containing linker protein 1 [Source:HGNC Symbol;Acc:10461]                       | -1.16 | 1.1E-08 |
| HDHD3    | ENSG00000119431 | haloacid dehalogenase-like hydrolase domain containing 3 [Source:HGNC Symbol;Acc:28171]         | -1.18 | 1.1E-08 |
| OSER1    | ENSG00000132823 | oxidative stress responsive serine-rich 1 [Source:HGNC Symbol;Acc:16105]                        | -0.76 | 1.1E-08 |
| PFKP     | ENSG00000067057 | phosphofructokinase, platelet [Source:HGNC Symbol;Acc:8878]                                     | -0.99 | 1.1E-08 |
| B3GNT8   | ENSG00000177191 | UDP-GlcNAc:betaGal beta-1,3-N-acetylglucosaminyltransferase 8 [Source:HGNC Symbol;Acc:24139]    | -1.63 | 1.1E-08 |
| --       | ENSG00000250602 | --                                                                                              | -1.55 | 1.1E-08 |
| ARHGAP35 | ENSG00000160007 | Rho GTPase activating protein 35 [Source:HGNC Symbol;Acc:4591]                                  | -0.89 | 1.1E-08 |
| TSC22D3  | ENSG00000157514 | TSC22 domain family, member 3 [Source:HGNC Symbol;Acc:3051]                                     | -0.86 | 1.2E-08 |
| ULK1     | ENSG00000177169 | unc-51 like autophagy activating kinase 1 [Source:HGNC Symbol;Acc:12558]                        | -1.00 | 1.2E-08 |
| TLCD2    | ENSG00000185561 | TLC domain containing 2 [Source:HGNC Symbol;Acc:33522]                                          | -2.01 | 1.2E-08 |
| --       | ENSG00000267905 | --                                                                                              | -2.85 | 1.2E-08 |
| RGP1     | ENSG00000107185 | RGP1 retrograde golgi transport homolog ( <i>S. cerevisiae</i> ) [Source:HGNC Symbol;Acc:21965] | -0.95 | 1.2E-08 |
| CTTN     | ENSG00000085733 | cortactin [Source:HGNC Symbol;Acc:3338]                                                         | -0.81 | 1.2E-08 |
| --       | ENSG00000188242 | Uncharacterized protein [Source:UniProtKB/TrEMBL;Acc:D6RHG8]                                    | -1.47 | 1.2E-08 |

|           |                 |                                                                                            |       |         |
|-----------|-----------------|--------------------------------------------------------------------------------------------|-------|---------|
| MAX       | ENSG00000125952 | MYC associated factor X [Source:HGNC Symbol;Acc:6913]                                      | -0.75 | 1.3E-08 |
| FAM120AOS | ENSG00000188938 | family with sequence similarity 120A opposite strand [Source:HGNC Symbol;Acc:23389]        | -0.74 | 1.3E-08 |
| ARHGAP21  | ENSG00000107863 | Rho GTPase activating protein 21 [Source:HGNC Symbol;Acc:23725]                            | -0.95 | 1.3E-08 |
| --        | ENSG00000203400 | --                                                                                         | -1.36 | 1.3E-08 |
| FAM131A   | ENSG00000175182 | family with sequence similarity 131, member A [Source:HGNC Symbol;Acc:28308]               | -1.13 | 1.4E-08 |
| PARP14    | ENSG00000173193 | poly (ADP-ribose) polymerase family, member 14 [Source:HGNC Symbol;Acc:29232]              | -0.91 | 1.4E-08 |
| SMG7      | ENSG00000116698 | SMG7 nonsense mediated mRNA decay factor [Source:HGNC Symbol;Acc:16792]                    | -0.63 | 1.4E-08 |
| ARHGEF34P | ENSG00000204959 | Rho guanine nucleotide exchange factor (GEF) 34, pseudogene [Source:HGNC Symbol;Acc:38086] | -1.04 | 1.5E-08 |
| PDLIM7    | ENSG00000196923 | PDZ and LIM domain 7 (enigma) [Source:HGNC Symbol;Acc:22958]                               | -1.45 | 1.5E-08 |
| LTB       | ENSG00000227507 | lymphotoxin beta (TNF superfamily, member 3) [Source:HGNC Symbol;Acc:6711]                 | -1.88 | 1.6E-08 |
| ATG13     | ENSG00000175224 | autophagy related 13 [Source:HGNC Symbol;Acc:29091]                                        | -0.78 | 1.6E-08 |
| KCTD5     | ENSG00000167977 | potassium channel tetramerization domain containing 5 [Source:HGNC Symbol;Acc:21423]       | -0.96 | 1.6E-08 |
| --        | ENSG00000236915 | --                                                                                         | -2.45 | 1.6E-08 |
| SLCO2B1   | ENSG00000137491 | solute carrier organic anion transporter family, member 2B1 [Source:HGNC Symbol;Acc:10962] | -0.94 | 1.6E-08 |
| SUN2      | ENSG00000100242 | Sad1 and UNC84 domain containing 2 [Source:HGNC Symbol;Acc:14210]                          | -1.15 | 1.6E-08 |
| DHRS7     | ENSG00000100612 | dehydrogenase/reductase (SDR family) member 7 [Source:HGNC Symbol;Acc:21524]               | -0.94 | 1.7E-08 |
| --        | ENSG00000225138 | --                                                                                         | -1.61 | 1.7E-08 |
| MTMR14    | ENSG00000163719 | myotubularin related protein 14 [Source:HGNC Symbol;Acc:26190]                             | -0.95 | 1.7E-08 |
| ARHGAP26  | ENSG00000145819 | Rho GTPase activating protein 26 [Source:HGNC Symbol;Acc:17073]                            | -0.89 | 1.7E-08 |

|          |                 |                                                                                                                             |       |         |
|----------|-----------------|-----------------------------------------------------------------------------------------------------------------------------|-------|---------|
| BAK1     | ENSG00000030110 | BCL2-antagonist/killer 1 [Source:HGNC Symbol;Acc:949]<br>HCG1787699; Uncharacterized protein                                | -1.14 | 1.7E-08 |
| --       | ENSG00000268950 | [Source:UniProtKB/TrEMBL;Acc:MOR3D0]<br>plakophilin 1 (ectodermal dysplasia/skin fragility syndrome)                        | -1.40 | 1.7E-08 |
| PKP1     | ENSG00000081277 | [Source:HGNC Symbol;Acc:9023]                                                                                               | -1.50 | 1.7E-08 |
| CPNE8    | ENSG00000139117 | copine VIII [Source:HGNC Symbol;Acc:23498]                                                                                  | -1.37 | 1.8E-08 |
| FER1L6   | ENSG00000214814 | fer-1-like 6 (C. elegans) [Source:HGNC Symbol;Acc:28065]                                                                    | -1.43 | 1.8E-08 |
| BTBD19   | ENSG00000222009 | BTB (POZ) domain containing 19 [Source:HGNC Symbol;Acc:27145]                                                               | -1.63 | 1.9E-08 |
| CRB3     | ENSG00000130545 | crumbs homolog 3 (Drosophila) [Source:HGNC Symbol;Acc:20237]                                                                | -1.34 | 1.9E-08 |
| PINK1    | ENSG00000158828 | PTEN induced putative kinase 1 [Source:HGNC Symbol;Acc:14581]                                                               | -1.07 | 1.9E-08 |
| RNASET2  | ENSG00000026297 | ribonuclease T2 [Source:HGNC Symbol;Acc:21686]                                                                              | -0.99 | 1.9E-08 |
| NCOA3    | ENSG00000124151 | nuclear receptor coactivator 3 [Source:HGNC Symbol;Acc:7670]                                                                | -0.99 | 1.9E-08 |
| ARL14    | ENSG00000179674 | ADP-ribosylation factor-like 14 [Source:HGNC Symbol;Acc:22974]<br>family with sequence similarity 83, member E [Source:HGNC | -0.99 | 2.0E-08 |
| FAM83E   | ENSG00000105523 | Symbol;Acc:25972]                                                                                                           | -1.44 | 2.0E-08 |
| --       | ENSG00000261521 | --<br>serine peptidase inhibitor, Kunitz type, 2 [Source:HGNC                                                               | -1.64 | 2.0E-08 |
| SPINT2   | ENSG00000167642 | Symbol;Acc:11247]<br>calmodulin 2 (phosphorylase kinase, delta) [Source:HGNC                                                | -0.85 | 2.0E-08 |
| CALM2    | ENSG00000143933 | Symbol;Acc:1445]                                                                                                            | -1.02 | 2.1E-08 |
| TBC1D22B | ENSG00000065491 | TBC1 domain family, member 22B [Source:HGNC Symbol;Acc:21602]<br>tetratricopeptide repeat domain 39A [Source:HGNC           | -0.97 | 2.1E-08 |
| TTC39A   | ENSG00000085831 | Symbol;Acc:18657]<br>solute carrier family 22, member 18 [Source:HGNC                                                       | -0.77 | 2.1E-08 |
| SLC22A18 | ENSG00000110628 | Symbol;Acc:10964]                                                                                                           | -1.40 | 2.2E-08 |
| SERTAD1  | ENSG00000197019 | SERTA domain containing 1 [Source:HGNC Symbol;Acc:17932]<br>family with sequence similarity 46, member A [Source:HGNC       | -1.39 | 2.2E-08 |
| FAM46A   | ENSG00000112773 | Symbol;Acc:18345]                                                                                                           | -1.10 | 2.3E-08 |
| EDN1     | ENSG00000078401 | endothelin 1 [Source:HGNC Symbol;Acc:3176]                                                                                  | -1.26 | 2.3E-08 |

|           |                 |                                                                                                                              |       |         |
|-----------|-----------------|------------------------------------------------------------------------------------------------------------------------------|-------|---------|
| GALNT5    | ENSG00000136542 | UDP-N-acetyl-alpha-D-galactosamine:polypeptide N-acetylgalactosaminyltransferase 5 (GalNAc-T5) [Source:HGNC Symbol;Acc:4127] | -1.08 | 2.3E-08 |
| TMSB10    | ENSG00000034510 | thymosin beta 10 [Source:HGNC Symbol;Acc:11879]                                                                              | -0.80 | 2.3E-08 |
| KCNH8     | ENSG00000183960 | potassium voltage-gated channel, subfamily H (eag-related), member 8 [Source:HGNC Symbol;Acc:18864]                          | -1.15 | 2.4E-08 |
| DTX4      | ENSG00000110042 | deltex homolog 4 (Drosophila) [Source:HGNC Symbol;Acc:29151]                                                                 | -0.87 | 2.4E-08 |
| CTNNB1    | ENSG00000168036 | catenin (cadherin-associated protein), beta 1, 88kDa [Source:HGNC Symbol;Acc:2514]                                           | -1.11 | 2.5E-08 |
| IMPDH1P10 | ENSG00000232133 | IMP (inosine monophosphate) dehydrogenase 1 pseudogene 10 [Source:HGNC Symbol;Acc:33965]                                     | -1.52 | 2.5E-08 |
| --        | ENSG00000233706 | --                                                                                                                           | -1.22 | 2.6E-08 |
| KCTD9     | ENSG00000104756 | potassium channel tetramerization domain containing 9 [Source:HGNC Symbol;Acc:22401]                                         | -1.19 | 2.7E-08 |
| P4HB      | ENSG00000185624 | prolyl 4-hydroxylase, beta polypeptide [Source:HGNC Symbol;Acc:8548]                                                         | -0.95 | 2.7E-08 |
| TP53INP1  | ENSG00000164938 | tumor protein p53 inducible nuclear protein 1 [Source:HGNC Symbol;Acc:18022]                                                 | -1.04 | 2.8E-08 |
| SLC8B1    | ENSG00000089060 | solute carrier family 8 (sodium/lithium/calcium exchanger), member B1 [Source:HGNC Symbol;Acc:26175]                         | -1.07 | 2.8E-08 |
| --        | ENSG00000225946 | --                                                                                                                           | -1.27 | 2.8E-08 |
| --        | ENSG00000267416 | --                                                                                                                           | -1.63 | 2.9E-08 |
| IL8       | ENSG00000169429 | interleukin 8 [Source:HGNC Symbol;Acc:6025]                                                                                  | -1.34 | 2.9E-08 |
| OCLN      | ENSG00000197822 | occludin [Source:HGNC Symbol;Acc:8104]                                                                                       | -0.96 | 3.0E-08 |
| ETHE1     | ENSG00000105755 | ethylmalonic encephalopathy 1 [Source:HGNC Symbol;Acc:23287]                                                                 | -0.88 | 3.0E-08 |
| --        | ENSG00000260912 | --                                                                                                                           | -1.02 | 3.0E-08 |
| SEMA6A    | ENSG00000092421 | sema domain, transmembrane domain (TM), and cytoplasmic domain, (semaphorin) 6A [Source:HGNC Symbol;Acc:10738]               | -1.10 | 3.0E-08 |

|          |                 |                                                                                                                                     |       |         |
|----------|-----------------|-------------------------------------------------------------------------------------------------------------------------------------|-------|---------|
| DENND6B  | ENSG00000205593 | DENN/MADD domain containing 6B [Source:HGNC Symbol;Acc:32690]                                                                       | -1.34 | 3.0E-08 |
| MCOLN1   | ENSG00000090674 | mucolipin 1 [Source:HGNC Symbol;Acc:13356]                                                                                          | -1.24 | 3.1E-08 |
| WBP1L    | ENSG00000166272 | WW domain binding protein 1-like [Source:HGNC Symbol;Acc:23510]                                                                     | -0.89 | 3.1E-08 |
| IL6ST    | ENSG00000134352 | interleukin 6 signal transducer (gp130, oncostatin M receptor) [Source:HGNC Symbol;Acc:6021]                                        | -1.19 | 3.2E-08 |
| GRN      | ENSG00000030582 | granulin [Source:HGNC Symbol;Acc:4601]                                                                                              | -1.22 | 3.2E-08 |
| ARPC5    | ENSG00000162704 | actin related protein 2/3 complex, subunit 5, 16kDa [Source:HGNC Symbol;Acc:708]                                                    | -0.96 | 3.2E-08 |
| ZFYVE28  | ENSG00000159733 | zinc finger, FYVE domain containing 28 [Source:HGNC Symbol;Acc:29334]                                                               | -1.39 | 3.3E-08 |
| SLC22A23 | ENSG00000137266 | solute carrier family 22, member 23 [Source:HGNC Symbol;Acc:21106]                                                                  | -0.84 | 3.4E-08 |
| GNAL     | ENSG00000141404 | guanine nucleotide binding protein (G protein), alpha activating activity polypeptide, olfactory type [Source:HGNC Symbol;Acc:4388] | -0.92 | 3.4E-08 |
| MAPK6    | ENSG00000069956 | mitogen-activated protein kinase 6 [Source:HGNC Symbol;Acc:6879]                                                                    | -1.18 | 3.4E-08 |
| ITGB8    | ENSG00000105855 | integrin, beta 8 [Source:HGNC Symbol;Acc:6163]                                                                                      | -1.38 | 3.4E-08 |
| --       | ENSG00000267815 | --                                                                                                                                  | -1.47 | 3.4E-08 |
| GAREM    | ENSG00000141441 | GRB2 associated, regulator of MAPK1 [Source:HGNC Symbol;Acc:26136]                                                                  | -1.31 | 3.5E-08 |
| VNN2     | ENSG00000112303 | vanin 2 [Source:HGNC Symbol;Acc:12706]                                                                                              | -1.35 | 3.6E-08 |
| INPP4B   | ENSG00000109452 | inositol polyphosphate-4-phosphatase, type II, 105kDa [Source:HGNC Symbol;Acc:6075]                                                 | -1.35 | 3.6E-08 |
| CFL1     | ENSG00000172757 | cofilin 1 (non-muscle) [Source:HGNC Symbol;Acc:1874]                                                                                | -0.73 | 3.7E-08 |
| CEACAM3  | ENSG00000170956 | carcinoembryonic antigen-related cell adhesion molecule 3 [Source:HGNC Symbol;Acc:1815]                                             | -3.13 | 3.7E-08 |
| SH3GL1   | ENSG00000141985 | SH3-domain GRB2-like 1 [Source:HGNC Symbol;Acc:10830]                                                                               | -1.14 | 3.7E-08 |
| GNE      | ENSG00000159921 | glucosamine (UDP-N-acetyl)-2-epimerase/N-acetylmannosamine kinase [Source:HGNC Symbol;Acc:23657]                                    | -0.92 | 3.7E-08 |

|           |                 |                                                                                                                   |       |         |
|-----------|-----------------|-------------------------------------------------------------------------------------------------------------------|-------|---------|
| TFAP2A    | ENSG00000137203 | transcription factor AP-2 alpha (activating enhancer binding protein 2 alpha) [Source:HGNC Symbol;Acc:11742]      | -0.87 | 3.8E-08 |
| CIB1      | ENSG00000185043 | calcium and integrin binding 1 (calmyrin) [Source:HGNC Symbol;Acc:16920]                                          | -0.97 | 3.9E-08 |
| SLC30A4   | ENSG00000104154 | solute carrier family 30 (zinc transporter), member 4 [Source:HGNC Symbol;Acc:11015]                              | -1.16 | 3.9E-08 |
| ILDR1     | ENSG00000145103 | immunoglobulin-like domain containing receptor 1 [Source:HGNC Symbol;Acc:28741]                                   | -1.17 | 3.9E-08 |
| SLC7A7    | ENSG00000155465 | solute carrier family 7 (amino acid transporter light chain, y+L system), member 7 [Source:HGNC Symbol;Acc:11065] | -0.80 | 3.9E-08 |
| FAM160A1  | ENSG00000164142 | family with sequence similarity 160, member A1 [Source:HGNC Symbol;Acc:34237]                                     | -1.43 | 3.9E-08 |
| LINC00955 | ENSG00000216560 | long intergenic non-protein coding RNA 955 [Source:HGNC Symbol;Acc:26644]                                         | -2.85 | 3.9E-08 |
| RAB11A    | ENSG00000103769 | RAB11A, member RAS oncogene family [Source:HGNC Symbol;Acc:9760]                                                  | -0.83 | 4.0E-08 |
| STAT2     | ENSG00000170581 | signal transducer and activator of transcription 2, 113kDa [Source:HGNC Symbol;Acc:11363]                         | -0.66 | 4.1E-08 |
| BAZ2A     | ENSG00000076108 | bromodomain adjacent to zinc finger domain, 2A [Source:HGNC Symbol;Acc:962]                                       | -0.61 | 4.2E-08 |
| INF2      | ENSG00000203485 | inverted formin, FH2 and WH2 domain containing [Source:HGNC Symbol;Acc:23791]                                     | -1.22 | 4.3E-08 |
| TPMT      | ENSG00000137364 | thiopurine S-methyltransferase [Source:HGNC Symbol;Acc:12014]                                                     | -1.00 | 4.3E-08 |
| RGS20     | ENSG00000147509 | regulator of G-protein signaling 20 [Source:HGNC Symbol;Acc:14600]                                                | -1.04 | 4.3E-08 |
| ASL       | ENSG00000126522 | argininosuccinate lyase [Source:HGNC Symbol;Acc:746]                                                              | -1.14 | 4.3E-08 |
| PLA2G16   | ENSG00000176485 | phospholipase A2, group XVI [Source:HGNC Symbol;Acc:17825]                                                        | -0.85 | 4.5E-08 |
| CSRP1     | ENSG00000159176 | cysteine and glycine-rich protein 1 [Source:HGNC Symbol;Acc:2469]                                                 | -0.78 | 4.5E-08 |
| SPSB1     | ENSG00000171621 | splA/ryanodine receptor domain and SOCS box containing 1 [Source:HGNC Symbol;Acc:30628]                           | -1.03 | 4.5E-08 |

|         |                 |                                                                                                                    |       |         |
|---------|-----------------|--------------------------------------------------------------------------------------------------------------------|-------|---------|
| PPIF    | ENSG00000108179 | peptidylprolyl isomerase F [Source:HGNC Symbol;Acc:9259]                                                           | -1.00 | 4.6E-08 |
| PEX26   | ENSG00000215193 | peroxisomal biogenesis factor 26 [Source:HGNC Symbol;Acc:22965]                                                    | -0.75 | 4.7E-08 |
| SCARB2  | ENSG00000138760 | scavenger receptor class B, member 2 [Source:HGNC Symbol;Acc:1665]                                                 | -0.97 | 4.7E-08 |
| STX5    | ENSG00000162236 | syntaxin 5 [Source:HGNC Symbol;Acc:11440]                                                                          | -0.72 | 4.7E-08 |
| SIRT7   | ENSG00000187531 | sirtuin 7 [Source:HGNC Symbol;Acc:14935]                                                                           | -1.20 | 4.9E-08 |
| RNF185  | ENSG00000138942 | ring finger protein 185 [Source:HGNC Symbol;Acc:26783]                                                             | -0.78 | 4.9E-08 |
| PLXNA3  | ENSG00000130827 | plexin A3 [Source:HGNC Symbol;Acc:9101]                                                                            | -1.27 | 4.9E-08 |
| TBC1D20 | ENSG00000125875 | TBC1 domain family, member 20 [Source:HGNC Symbol;Acc:16133]                                                       | -0.60 | 5.1E-08 |
| --      | ENSG00000259342 | --                                                                                                                 | -1.01 | 5.1E-08 |
| ITCH    | ENSG00000078747 | itchy E3 ubiquitin protein ligase [Source:HGNC Symbol;Acc:13890]                                                   | -1.01 | 5.2E-08 |
| CTDSP1  | ENSG00000144579 | CTD (carboxy-terminal domain, RNA polymerase II, polypeptide A) small phosphatase 1 [Source:HGNC Symbol;Acc:21614] | -1.06 | 5.2E-08 |
| CDK19   | ENSG00000155111 | cyclin-dependent kinase 19 [Source:HGNC Symbol;Acc:19338]                                                          | -0.99 | 5.2E-08 |
| SEC24C  | ENSG00000176986 | SEC24 family member C [Source:HGNC Symbol;Acc:10705]                                                               | -0.71 | 5.2E-08 |
| CLCF1   | ENSG00000175505 | cardiotrophin-like cytokine factor 1 [Source:HGNC Symbol;Acc:17412]                                                | -1.49 | 5.5E-08 |
| FOLR1   | ENSG00000110195 | folate receptor 1 (adult) [Source:HGNC Symbol;Acc:3791]                                                            | -1.30 | 5.6E-08 |
| CHMP2A  | ENSG00000130724 | charged multivesicular body protein 2A [Source:HGNC Symbol;Acc:30216]                                              | -1.05 | 5.7E-08 |
| PPP4R1L | ENSG00000124224 | protein phosphatase 4, regulatory subunit 1-like [Source:HGNC Symbol;Acc:15755]                                    | -0.82 | 5.8E-08 |
| --      | ENSG00000257433 | --                                                                                                                 | -1.81 | 5.8E-08 |
| DCUN1D3 | ENSG00000188215 | DCN1, defective in cullin neddylation 1, domain containing 3 [Source:HGNC Symbol;Acc:28734]                        | -0.83 | 5.8E-08 |
| EZH1    | ENSG00000108799 | enhancer of zeste homolog 1 (Drosophila) [Source:HGNC Symbol;Acc:3526]                                             | -0.85 | 5.9E-08 |
| MYO1C   | ENSG00000197879 | myosin IC [Source:HGNC Symbol;Acc:7597]                                                                            | -0.87 | 5.9E-08 |



|          |                 |                                                                                              |       |         |
|----------|-----------------|----------------------------------------------------------------------------------------------|-------|---------|
| RIMKLA   | ENSG00000177181 | ribosomal modification protein rimK-like family member A [Source:HGNC Symbol;Acc:28725]      | -0.86 | 5.9E-08 |
| TMEM185A | ENSG00000155984 | transmembrane protein 185A [Source:HGNC Symbol;Acc:17125]                                    | -0.84 | 5.9E-08 |
| DDR1     | ENSG00000204580 | discoidin domain receptor tyrosine kinase 1 [Source:HGNC Symbol;Acc:2730]                    | -0.90 | 6.0E-08 |
| WBP2     | ENSG00000132471 | WW domain binding protein 2 [Source:HGNC Symbol;Acc:12738]                                   | -1.07 | 6.0E-08 |
| --       | ENSG00000269243 | --                                                                                           | -0.68 | 6.1E-08 |
| CERS2    | ENSG00000143418 | ceramide synthase 2 [Source:HGNC Symbol;Acc:14076]                                           | -0.66 | 6.2E-08 |
| --       | ENSG00000260276 | --                                                                                           | -1.02 | 6.3E-08 |
| MAFB     | ENSG00000204103 | v-maf avian musculoaponeurotic fibrosarcoma oncogene homolog B [Source:HGNC Symbol;Acc:6408] | -1.14 | 6.3E-08 |
| IFI35    | ENSG00000068079 | interferon-induced protein 35 [Source:HGNC Symbol;Acc:5399]                                  | -1.07 | 6.4E-08 |
| SH3PXD2A | ENSG00000107957 | SH3 and PX domains 2A [Source:HGNC Symbol;Acc:23664]                                         | -0.78 | 6.5E-08 |
| --       | ENSG00000265298 | --                                                                                           | -1.20 | 6.5E-08 |
| STX3     | ENSG00000166900 | syntaxin 3 [Source:HGNC Symbol;Acc:11438]                                                    | -0.72 | 6.6E-08 |
| SDC1     | ENSG00000115884 | syndecan 1 [Source:HGNC Symbol;Acc:10658]                                                    | -1.03 | 6.7E-08 |
| FBXL12   | ENSG00000127452 | F-box and leucine-rich repeat protein 12 [Source:HGNC Symbol;Acc:13611]                      | -0.94 | 6.7E-08 |
| KDM3A    | ENSG00000115548 | lysine (K)-specific demethylase 3A [Source:HGNC Symbol;Acc:20815]                            | -0.96 | 6.8E-08 |
| PP2D1    | ENSG00000183977 | protein phosphatase 2C-like domain containing 1 [Source:HGNC Symbol;Acc:28406]               | -0.88 | 6.8E-08 |
| CPEB4    | ENSG00000113742 | cytoplasmic polyadenylation element binding protein 4 [Source:HGNC Symbol;Acc:21747]         | -1.29 | 6.9E-08 |
| ACER3    | ENSG00000078124 | alkaline ceramidase 3 [Source:HGNC Symbol;Acc:16066]                                         | -1.09 | 6.9E-08 |
| --       | ENSG00000230698 | --                                                                                           | -1.37 | 7.0E-08 |
| --       | ENSG00000197146 | --                                                                                           | -1.45 | 7.1E-08 |
| --       | ENSG00000260281 | --                                                                                           | -1.17 | 7.1E-08 |
| METRNL   | ENSG00000176845 | meteorin, glial cell differentiation regulator-like [Source:HGNC Symbol;Acc:27584]           | -1.46 | 7.2E-08 |

|            |                 |                                                                                                          |       |         |
|------------|-----------------|----------------------------------------------------------------------------------------------------------|-------|---------|
| TMEM40     | ENSG00000088726 | transmembrane protein 40 [Source:HGNC Symbol;Acc:25620]                                                  | -1.45 | 7.2E-08 |
| AFAP1L2    | ENSG00000169129 | actin filament associated protein 1-like 2 [Source:HGNC Symbol;Acc:25901]                                | -1.07 | 7.3E-08 |
| PHLPP2     | ENSG00000040199 | PH domain and leucine rich repeat protein phosphatase 2 [Source:HGNC Symbol;Acc:29149]                   | -0.92 | 7.5E-08 |
| ST14       | ENSG00000149418 | suppression of tumorigenicity 14 (colon carcinoma) [Source:HGNC Symbol;Acc:11344]                        | -1.11 | 7.8E-08 |
| LGALS9     | ENSG00000168961 | lectin, galactoside-binding, soluble, 9 [Source:HGNC Symbol;Acc:6570]                                    | -0.92 | 7.9E-08 |
| CACNA1C-AS | ENSG00000246627 | CACNA1C antisense RNA 1 [Source:HGNC Symbol;Acc:40119]                                                   | -1.56 | 8.1E-08 |
| TMEM184A   | ENSG00000164855 | transmembrane protein 184A [Source:HGNC Symbol;Acc:28797]                                                | -1.28 | 8.1E-08 |
| SERPINB1   | ENSG00000021355 | serpin peptidase inhibitor, clade B (ovalbumin), member 1 [Source:HGNC Symbol;Acc:3311]                  | -0.78 | 8.2E-08 |
| C2orf88    | ENSG00000187699 | chromosome 2 open reading frame 88 [Source:HGNC Symbol;Acc:28191]                                        | -1.07 | 8.4E-08 |
| TINCR      | ENSG00000223573 | tissue differentiation-inducing non-protein coding RNA [Source:HGNC Symbol;Acc:14607]                    | -1.84 | 8.4E-08 |
| LINC00514  | ENSG00000262152 | long intergenic non-protein coding RNA 514 [Source:HGNC Symbol;Acc:27549]                                | -1.17 | 8.4E-08 |
| --         | ENSG00000221461 | Small nucleolar RNA U3 [Source:RFAM;Acc:RF00012]                                                         | -2.65 | 8.4E-08 |
| --         | ENSG00000260834 | --                                                                                                       | -1.07 | 8.5E-08 |
| DENND5B    | ENSG00000170456 | DENN/MADD domain containing 5B [Source:HGNC Symbol;Acc:28338]                                            | -1.27 | 8.5E-08 |
| NABP1      | ENSG00000173559 | nucleic acid binding protein 1 [Source:HGNC Symbol;Acc:26232]                                            | -1.07 | 8.6E-08 |
| EXT1       | ENSG00000182197 | exostosin glycosyltransferase 1 [Source:HGNC Symbol;Acc:3512]                                            | -0.74 | 8.7E-08 |
| NRBP1      | ENSG00000115216 | nuclear receptor binding protein 1 [Source:HGNC Symbol;Acc:7993]                                         | -0.82 | 8.7E-08 |
| --         | ENSG00000223947 | --                                                                                                       | -1.03 | 8.7E-08 |
| SLC6A9     | ENSG00000196517 | solute carrier family 6 (neurotransmitter transporter, glycine), member 9 [Source:HGNC Symbol;Acc:11056] | -1.05 | 8.7E-08 |

|        |                 |                                                                                                      |       |         |
|--------|-----------------|------------------------------------------------------------------------------------------------------|-------|---------|
| RAB5A  | ENSG00000144566 | RAB5A, member RAS oncogene family [Source:HGNC Symbol;Acc:9783]                                      | -0.97 | 8.9E-08 |
| CHMP2B | ENSG00000083937 | charged multivesicular body protein 2B [Source:HGNC Symbol;Acc:24537]                                | -1.22 | 8.9E-08 |
| JAG1   | ENSG00000101384 | jagged 1 [Source:HGNC Symbol;Acc:6188]                                                               | -0.83 | 8.9E-08 |
| LRCH4  | ENSG00000077454 | leucine-rich repeats and calponin homology (CH) domain containing 4 [Source:HGNC Symbol;Acc:6691]    | -1.27 | 8.9E-08 |
| ATP2B4 | ENSG00000058668 | ATPase, Ca <sup>++</sup> transporting, plasma membrane 4 [Source:HGNC Symbol;Acc:817]                | -0.96 | 9.0E-08 |
| RNF122 | ENSG00000133874 | ring finger protein 122 [Source:HGNC Symbol;Acc:21147]                                               | -1.51 | 9.1E-08 |
| HOMEZ  | ENSG00000215271 | homeobox and leucine zipper encoding [Source:HGNC Symbol;Acc:20164]                                  | -0.74 | 9.3E-08 |
| TFF2   | ENSG00000160181 | trefoil factor 2 [Source:HGNC Symbol;Acc:11756]                                                      | -1.47 | 9.5E-08 |
| --     | ENSG00000259407 | --                                                                                                   | -1.04 | 9.5E-08 |
| --     | ENSG00000203688 | --                                                                                                   | -1.22 | 9.5E-08 |
| MLX    | ENSG00000108788 | MLX, MAX dimerization protein [Source:HGNC Symbol;Acc:11645]                                         | -0.73 | 9.6E-08 |
| MFSD9  | ENSG00000135953 | major facilitator superfamily domain containing 9 [Source:HGNC Symbol;Acc:28158]                     | -0.91 | 9.6E-08 |
| CYP2D6 | ENSG00000100197 | cytochrome P450, family 2, subfamily D, polypeptide 6 [Source:HGNC Symbol;Acc:2625]                  | -1.56 | 9.7E-08 |
| GGA3   | ENSG00000125447 | golgi-associated, gamma adaptin ear containing, ARF binding protein 3 [Source:HGNC Symbol;Acc:17079] | -0.81 | 9.8E-08 |
| PRR15  | ENSG00000176532 | proline rich 15 [Source:HGNC Symbol;Acc:22310]                                                       | -0.83 | 1.0E-07 |
| BBC3   | ENSG00000105327 | BCL2 binding component 3 [Source:HGNC Symbol;Acc:17868]                                              | -1.44 | 1.0E-07 |
| PAG1   | ENSG00000076641 | phosphoprotein associated with glycosphingolipid microdomains 1 [Source:HGNC Symbol;Acc:30043]       | -1.32 | 1.0E-07 |
| HERC4  | ENSG00000148634 | HECT and RLD domain containing E3 ubiquitin protein ligase 4 [Source:HGNC Symbol;Acc:24521]          | -1.01 | 1.0E-07 |
| --     | ENSG00000232682 | --                                                                                                   | -1.92 | 1.0E-07 |

|          |                 |                                                                                                       |       |         |
|----------|-----------------|-------------------------------------------------------------------------------------------------------|-------|---------|
| RNF19B   | ENSG00000116514 | ring finger protein 19B [Source:HGNC Symbol;Acc:26886]                                                | -1.31 | 1.0E-07 |
| FBLIM1   | ENSG00000162458 | filamin binding LIM protein 1 [Source:HGNC Symbol;Acc:24686]                                          | -0.99 | 1.1E-07 |
| IQCD     | ENSG00000166578 | IQ motif containing D [Source:HGNC Symbol;Acc:25168]                                                  | -1.27 | 1.1E-07 |
| SYS1     | ENSG00000204070 | SYS1 Golgi-localized integral membrane protein homolog (S. cerevisiae) [Source:HGNC Symbol;Acc:16162] | -0.72 | 1.1E-07 |
| MERTK    | ENSG00000153208 | c-mer proto-oncogene tyrosine kinase [Source:HGNC Symbol;Acc:7027]                                    | -0.83 | 1.1E-07 |
| P4HA1    | ENSG00000122884 | prolyl 4-hydroxylase, alpha polypeptide I [Source:HGNC Symbol;Acc:8546]                               | -1.27 | 1.1E-07 |
| HS6ST1   | ENSG00000136720 | heparan sulfate 6-O-sulfotransferase 1 [Source:HGNC Symbol;Acc:5201]                                  | -1.23 | 1.1E-07 |
| CYP2C18  | ENSG00000108242 | cytochrome P450, family 2, subfamily C, polypeptide 18 [Source:HGNC Symbol;Acc:2620]                  | -1.42 | 1.1E-07 |
| NAMPT    | ENSG00000105835 | nicotinamide phosphoribosyltransferase [Source:HGNC Symbol;Acc:30092]                                 | -0.90 | 1.1E-07 |
| COPG1    | ENSG00000181789 | coatamer protein complex, subunit gamma 1 [Source:HGNC Symbol;Acc:2236]                               | -0.72 | 1.2E-07 |
| STEAP4   | ENSG00000127954 | STEAP family member 4 [Source:HGNC Symbol;Acc:21923]                                                  | -1.29 | 1.2E-07 |
| CACNG4   | ENSG00000075461 | calcium channel, voltage-dependent, gamma subunit 4 [Source:HGNC Symbol;Acc:1408]                     | -0.90 | 1.2E-07 |
| MAFK     | ENSG00000198517 | v-maf avian musculoaponeurotic fibrosarcoma oncogene homolog K [Source:HGNC Symbol;Acc:6782]          | -1.20 | 1.2E-07 |
| GBP2     | ENSG00000162645 | guanylate binding protein 2, interferon-inducible [Source:HGNC Symbol;Acc:4183]                       | -0.99 | 1.2E-07 |
| C11orf91 | ENSG00000205177 | chromosome 11 open reading frame 91 [Source:HGNC Symbol;Acc:34444]                                    | -2.69 | 1.2E-07 |
| ZNF611   | ENSG00000213020 | zinc finger protein 611 [Source:HGNC Symbol;Acc:28766]                                                | -1.02 | 1.2E-07 |
| NT5C3A   | ENSG00000122643 | 5'-nucleotidase, cytosolic IIIA [Source:HGNC Symbol;Acc:17820]                                        | -1.06 | 1.3E-07 |

|           |                 |                                                                                                                         |       |         |
|-----------|-----------------|-------------------------------------------------------------------------------------------------------------------------|-------|---------|
| ATP2A2    | ENSG00000174437 | ATPase, Ca <sup>++</sup> transporting, cardiac muscle, slow twitch 2<br>[Source:HGNC Symbol;Acc:812]                    | -0.78 | 1.3E-07 |
| LINC00969 | ENSG00000242086 | long intergenic non-protein coding RNA 969 [Source:HGNC<br>Symbol;Acc:48729]                                            | -0.73 | 1.3E-07 |
| TPCN1     | ENSG00000186815 | two pore segment channel 1 [Source:HGNC Symbol;Acc:18182]                                                               | -0.97 | 1.3E-07 |
| VASN      | ENSG00000168140 | vasorin [Source:HGNC Symbol;Acc:18517]                                                                                  | -1.88 | 1.3E-07 |
| DEDD2     | ENSG00000160570 | death effector domain containing 2 [Source:HGNC Symbol;Acc:24450]                                                       | -1.14 | 1.4E-07 |
| PLEKHM1P  | ENSG00000214176 | pleckstrin homology domain containing, family M (with RUN domain)<br>member 1 pseudogene [Source:HGNC Symbol;Acc:35411] | -1.02 | 1.4E-07 |
| CPM       | ENSG00000135678 | carboxypeptidase M [Source:HGNC Symbol;Acc:2311]                                                                        | -1.05 | 1.4E-07 |
| SIPA1L3   | ENSG00000105738 | signal-induced proliferation-associated 1 like 3 [Source:HGNC<br>Symbol;Acc:23801]                                      | -0.77 | 1.4E-07 |
| STAT3     | ENSG00000168610 | signal transducer and activator of transcription 3 (acute-phase<br>response factor) [Source:HGNC Symbol;Acc:11364]      | -0.78 | 1.4E-07 |
| TPPP      | ENSG00000171368 | tubulin polymerization promoting protein [Source:HGNC<br>Symbol;Acc:24164]                                              | -1.09 | 1.5E-07 |
| B4GALT5   | ENSG00000158470 | UDP-Gal:betaGlcNAc beta 1,4- galactosyltransferase, polypeptide 5<br>[Source:HGNC Symbol;Acc:928]                       | -0.83 | 1.5E-07 |
| PTPRR     | ENSG00000153233 | protein tyrosine phosphatase, receptor type, R [Source:HGNC<br>Symbol;Acc:9680]                                         | -1.39 | 1.5E-07 |
| EPS8L2    | ENSG00000177106 | EPS8-like 2 [Source:HGNC Symbol;Acc:21296]                                                                              | -1.17 | 1.5E-07 |
| CERCAM    | ENSG00000167123 | cerebral endothelial cell adhesion molecule [Source:HGNC<br>Symbol;Acc:23723]                                           | -1.01 | 1.5E-07 |
| --        | ENSG00000261416 | --                                                                                                                      | -1.18 | 1.5E-07 |
| CCAT1     | ENSG00000247844 | colon cancer associated transcript 1 (non-protein coding)<br>[Source:HGNC Symbol;Acc:45128]                             | -1.36 | 1.6E-07 |
| --        | ENSG00000230882 | --                                                                                                                      | -1.56 | 1.6E-07 |
| ZFAND2B   | ENSG00000158552 | zinc finger, AN1-type domain 2B [Source:HGNC Symbol;Acc:25206]                                                          | -1.05 | 1.7E-07 |

|          |                 |                                                                                                             |       |         |
|----------|-----------------|-------------------------------------------------------------------------------------------------------------|-------|---------|
| BACH1    | ENSG00000156273 | BTB and CNC homology 1, basic leucine zipper transcription factor 1 [Source:HGNC Symbol;Acc:935]            | -1.35 | 1.7E-07 |
| YWHAZ    | ENSG00000164924 | tyrosine 3-monooxygenase/tryptophan 5-monooxygenase activation protein, zeta [Source:HGNC Symbol;Acc:12855] | -0.95 | 1.7E-07 |
| PGM3     | ENSG00000013375 | phosphoglucomutase 3 [Source:HGNC Symbol;Acc:8907]                                                          | -0.91 | 1.7E-07 |
| STK17A   | ENSG00000164543 | serine/threonine kinase 17a [Source:HGNC Symbol;Acc:11395]                                                  | -0.95 | 1.7E-07 |
| GSKIP    | ENSG00000100744 | GSK3B interacting protein [Source:HGNC Symbol;Acc:20343]                                                    | -1.31 | 1.7E-07 |
| TRPM4    | ENSG00000130529 | transient receptor potential cation channel, subfamily M, member 4 [Source:HGNC Symbol;Acc:17993]           | -1.13 | 1.7E-07 |
| PPP1R13L | ENSG00000104881 | protein phosphatase 1, regulatory subunit 13 like [Source:HGNC Symbol;Acc:18838]                            | -1.23 | 1.8E-07 |
| --       | ENSG00000267078 | --                                                                                                          | -1.34 | 1.8E-07 |
| PLEK2    | ENSG00000100558 | pleckstrin 2 [Source:HGNC Symbol;Acc:19238]                                                                 | -0.66 | 1.8E-07 |
| FAM63B   | ENSG00000128923 | family with sequence similarity 63, member B [Source:HGNC Symbol;Acc:26954]                                 | -1.16 | 1.8E-07 |
| SLC6A14  | ENSG00000087916 | solute carrier family 6 (amino acid transporter), member 14 [Source:HGNC Symbol;Acc:11047]                  | -1.30 | 1.8E-07 |
| HSPA5    | ENSG00000044574 | heat shock 70kDa protein 5 (glucose-regulated protein, 78kDa) [Source:HGNC Symbol;Acc:5238]                 | -0.73 | 1.9E-07 |
| TMEM65   | ENSG00000164983 | transmembrane protein 65 [Source:HGNC Symbol;Acc:25203]                                                     | -1.20 | 1.9E-07 |
| MAP3K9   | ENSG00000006432 | mitogen-activated protein kinase kinase kinase 9 [Source:HGNC Symbol;Acc:6861]                              | -0.81 | 2.0E-07 |
| FICD     | ENSG00000198855 | FIC domain containing [Source:HGNC Symbol;Acc:18416]                                                        | -0.95 | 2.0E-07 |
| LONRF3   | ENSG00000175556 | LON peptidase N-terminal domain and ring finger 3 [Source:HGNC Symbol;Acc:21152]                            | -0.84 | 2.0E-07 |
| SREBF2   | ENSG00000198911 | sterol regulatory element binding transcription factor 2 [Source:HGNC Symbol;Acc:11290]                     | -0.67 | 2.1E-07 |
| PPP1R14C | ENSG00000198729 | protein phosphatase 1, regulatory (inhibitor) subunit 14C [Source:HGNC Symbol;Acc:14952]                    | -1.27 | 2.1E-07 |

|          |                 |                                                                                                       |       |         |
|----------|-----------------|-------------------------------------------------------------------------------------------------------|-------|---------|
| C6orf89  | ENSG00000198663 | chromosome 6 open reading frame 89 [Source:HGNC Symbol;Acc:21114]                                     | -0.71 | 2.1E-07 |
| --       | ENSG00000233138 | --                                                                                                    | -1.73 | 2.1E-07 |
| PPP1R18  | ENSG00000146112 | protein phosphatase 1, regulatory subunit 18 [Source:HGNC Symbol;Acc:29413]                           | -0.97 | 2.1E-07 |
| TBC1D25  | ENSG00000068354 | TBC1 domain family, member 25 [Source:HGNC Symbol;Acc:8092]                                           | -0.97 | 2.1E-07 |
| TMC6     | ENSG00000141524 | transmembrane channel-like 6 [Source:HGNC Symbol;Acc:18021]                                           | -1.16 | 2.1E-07 |
| TBX15    | ENSG00000092607 | T-box 15 [Source:HGNC Symbol;Acc:11594]                                                               | -1.80 | 2.2E-07 |
| --       | ENSG00000269915 | --                                                                                                    | -1.33 | 2.2E-07 |
| DEDD     | ENSG00000158796 | death effector domain containing [Source:HGNC Symbol;Acc:2755]                                        | -0.67 | 2.2E-07 |
| RAB8A    | ENSG00000167461 | RAB8A, member RAS oncogene family [Source:HGNC Symbol;Acc:7007]                                       | -0.64 | 2.2E-07 |
| ARHGAP40 | ENSG00000124143 | Rho GTPase activating protein 40 [Source:HGNC Symbol;Acc:16226]                                       | -1.33 | 2.3E-07 |
| TMUB2    | ENSG00000168591 | transmembrane and ubiquitin-like domain containing 2 [Source:HGNC Symbol;Acc:28459]                   | -0.78 | 2.3E-07 |
| --       | ENSG00000257743 | Putative inactive maltase-glucoamylase-like protein LOC93432 [Source:UniProtKB/Swiss-Prot;Acc:Q2M2H8] | -1.43 | 2.3E-07 |
| --       | ENSG00000267139 | --                                                                                                    | -1.47 | 2.3E-07 |
| C16orf72 | ENSG00000182831 | chromosome 16 open reading frame 72 [Source:HGNC Symbol;Acc:30103]                                    | -1.00 | 2.4E-07 |
| NCALD    | ENSG00000104490 | neurocalcin delta [Source:HGNC Symbol;Acc:7655]                                                       | -1.36 | 2.4E-07 |
| C6orf106 | ENSG00000196821 | chromosome 6 open reading frame 106 [Source:HGNC Symbol;Acc:21215]                                    | -0.85 | 2.5E-07 |
| CORO1B   | ENSG00000172725 | coronin, actin binding protein, 1B [Source:HGNC Symbol;Acc:2253]                                      | -1.26 | 2.6E-07 |
| --       | ENSG00000267566 | --                                                                                                    | -1.02 | 2.6E-07 |
| EPS8L3   | ENSG00000198758 | EPS8-like 3 [Source:HGNC Symbol;Acc:21297]                                                            | -0.94 | 2.6E-07 |
| NIPA1    | ENSG00000170113 | non imprinted in Prader-Willi/Angelman syndrome 1 [Source:HGNC Symbol;Acc:17043]                      | -0.81 | 2.6E-07 |

|         |                 |                                                                                                 |       |         |
|---------|-----------------|-------------------------------------------------------------------------------------------------|-------|---------|
| PCLO    | ENSG00000186472 | piccolo presynaptic cytomatrix protein [Source:HGNC Symbol;Acc:13406]                           | -1.28 | 2.6E-07 |
| USP6NL  | ENSG00000148429 | USP6 N-terminal like [Source:HGNC Symbol;Acc:16858]                                             | -0.89 | 2.7E-07 |
| --      | ENSG00000265263 | --                                                                                              | -0.81 | 2.7E-07 |
| HTR1D   | ENSG00000179546 | 5-hydroxytryptamine (serotonin) receptor 1D, G protein-coupled [Source:HGNC Symbol;Acc:5289]    | -0.97 | 2.7E-07 |
| BTG1    | ENSG00000133639 | B-cell translocation gene 1, anti-proliferative [Source:HGNC Symbol;Acc:1130]                   | -0.81 | 2.7E-07 |
| S100A9  | ENSG00000163220 | S100 calcium binding protein A9 [Source:HGNC Symbol;Acc:10499]                                  | -1.31 | 2.7E-07 |
| PARD6B  | ENSG00000124171 | par-6 family cell polarity regulator beta [Source:HGNC Symbol;Acc:16245]                        | -1.26 | 2.7E-07 |
| HCG4B   | ENSG00000227262 | HLA complex group 4B (non-protein coding) [Source:HGNC Symbol;Acc:22919]                        | -1.55 | 2.7E-07 |
| CD2AP   | ENSG00000198087 | CD2-associated protein [Source:HGNC Symbol;Acc:14258]                                           | -1.25 | 2.8E-07 |
| CSF2    | ENSG00000164400 | colony stimulating factor 2 (granulocyte-macrophage) [Source:HGNC Symbol;Acc:2434]              | -2.07 | 2.8E-07 |
| --      | ENSG00000215769 | hsa-mir-6080 [Source:miRBase;Acc:MI0020357]                                                     | -1.09 | 2.8E-07 |
| --      | ENSG00000268913 | --                                                                                              | -1.15 | 2.8E-07 |
| GPSM3   | ENSG00000213654 | G-protein signaling modulator 3 [Source:HGNC Symbol;Acc:13945]                                  | -0.91 | 3.0E-07 |
| SLC16A5 | ENSG00000170190 | solute carrier family 16 (monocarboxylate transporter), member 5 [Source:HGNC Symbol;Acc:10926] | -1.05 | 3.0E-07 |
| LUZP1   | ENSG00000169641 | leucine zipper protein 1 [Source:HGNC Symbol;Acc:14985]                                         | -0.88 | 3.0E-07 |
| LDLRAD2 | ENSG00000187942 | low density lipoprotein receptor class A domain containing 2 [Source:HGNC Symbol;Acc:32071]     | -1.25 | 3.0E-07 |
| XRN1    | ENSG00000114127 | 5'-3' exoribonuclease 1 [Source:HGNC Symbol;Acc:30654]                                          | -1.18 | 3.0E-07 |
| RYBP    | ENSG00000163602 | RING1 and YY1 binding protein [Source:HGNC Symbol;Acc:10480]                                    | -0.91 | 3.0E-07 |
| LITAF   | ENSG00000189067 | lipopolysaccharide-induced TNF factor [Source:HGNC Symbol;Acc:16841]                            | -0.90 | 3.0E-07 |



|           |                 |                                                                                                           |       |         |
|-----------|-----------------|-----------------------------------------------------------------------------------------------------------|-------|---------|
| PLEKHM2   | ENSG00000116786 | pleckstrin homology domain containing, family M (with RUN domain) member 2 [Source:HGNC Symbol;Acc:29131] | -1.01 | 3.1E-07 |
| CST6      | ENSG00000175315 | cystatin E/M [Source:HGNC Symbol;Acc:2478]                                                                | -1.40 | 3.1E-07 |
| OSTM1     | ENSG00000081087 | osteopetrosis associated transmembrane protein 1 [Source:HGNC Symbol;Acc:21652]                           | -1.14 | 3.1E-07 |
| COL5A3    | ENSG00000080573 | collagen, type V, alpha 3 [Source:HGNC Symbol;Acc:14864]                                                  | -1.62 | 3.2E-07 |
| C9orf89   | ENSG00000165233 | chromosome 9 open reading frame 89 [Source:HGNC Symbol;Acc:28148]                                         | -1.09 | 3.2E-07 |
| MKNK1-AS1 | ENSG00000269956 | MKNK1 antisense RNA 1 [Source:HGNC Symbol;Acc:44129]                                                      | -1.11 | 3.2E-07 |
| RASSF6    | ENSG00000169435 | Ras association (RalGDS/AF-6) domain family member 6 [Source:HGNC Symbol;Acc:20796]                       | -1.14 | 3.2E-07 |
| PML       | ENSG00000140464 | promyelocytic leukemia [Source:HGNC Symbol;Acc:9113]                                                      | -1.01 | 3.2E-07 |
| CLDN1     | ENSG00000163347 | claudin 1 [Source:HGNC Symbol;Acc:2032]                                                                   | -0.89 | 3.2E-07 |
| SLC16A4   | ENSG00000168679 | solute carrier family 16, member 4 [Source:HGNC Symbol;Acc:10925]                                         | -1.24 | 3.3E-07 |
| ACOX1     | ENSG00000161533 | acyl-CoA oxidase 1, palmitoyl [Source:HGNC Symbol;Acc:119]                                                | -0.84 | 3.3E-07 |
| SLC31A2   | ENSG00000136867 | solute carrier family 31 (copper transporter), member 2 [Source:HGNC Symbol;Acc:11017]                    | -0.97 | 3.3E-07 |
| FBRS      | ENSG00000156860 | fibrosin [Source:HGNC Symbol;Acc:20442]                                                                   | -1.06 | 3.3E-07 |
| --        | ENSG00000248771 | --                                                                                                        | -1.28 | 3.4E-07 |
| IFI6      | ENSG00000126709 | interferon, alpha-inducible protein 6 [Source:HGNC Symbol;Acc:4054]                                       | -0.93 | 3.4E-07 |
| HAPLN3    | ENSG00000140511 | hyaluronan and proteoglycan link protein 3 [Source:HGNC Symbol;Acc:21446]                                 | -1.27 | 3.4E-07 |
| SEPP1     | ENSG00000250722 | selenoprotein P, plasma, 1 [Source:HGNC Symbol;Acc:10751]                                                 | -1.52 | 3.4E-07 |
| SLC28A1   | ENSG00000156222 | solute carrier family 28 (concentrative nucleoside transporter), member 1 [Source:HGNC Symbol;Acc:11001]  | -2.26 | 3.4E-07 |
| PHLDA2    | ENSG00000181649 | pleckstrin homology-like domain, family A, member 2 [Source:HGNC Symbol;Acc:12385]                        | -1.44 | 3.5E-07 |
| ANGPTL6   | ENSG00000130812 | angiopoietin-like 6 [Source:HGNC Symbol;Acc:23140]                                                        | -1.15 | 3.5E-07 |

|           |                 |                                                                                                                       |       |         |
|-----------|-----------------|-----------------------------------------------------------------------------------------------------------------------|-------|---------|
| CRTAC1    | ENSG00000095713 | cartilage acidic protein 1 [Source:HGNC Symbol;Acc:14882]                                                             | -1.95 | 3.5E-07 |
| CNST      | ENSG00000162852 | consortin, connexin sorting protein [Source:HGNC Symbol;Acc:26486]                                                    | -0.84 | 3.5E-07 |
| TMEM234   | ENSG00000160055 | transmembrane protein 234 [Source:HGNC Symbol;Acc:28837]                                                              | -0.90 | 3.5E-07 |
| SOCS1     | ENSG00000185338 | suppressor of cytokine signaling 1 [Source:HGNC Symbol;Acc:19383]                                                     | -1.98 | 3.5E-07 |
| NUMB      | ENSG00000133961 | numb homolog (Drosophila) [Source:HGNC Symbol;Acc:8060]                                                               | -0.74 | 3.6E-07 |
| CLCN2     | ENSG00000114859 | chloride channel, voltage-sensitive 2 [Source:HGNC Symbol;Acc:2020]                                                   | -1.03 | 3.6E-07 |
| --        | ENSG00000271380 | --                                                                                                                    | -1.05 | 3.6E-07 |
| UBA1      | ENSG00000130985 | ubiquitin-like modifier activating enzyme 1 [Source:HGNC Symbol;Acc:12469]                                            | -0.76 | 3.7E-07 |
| CLDN23    | ENSG00000253958 | claudin 23 [Source:HGNC Symbol;Acc:17591]                                                                             | -2.23 | 3.7E-07 |
| PARD3     | ENSG00000148498 | par-3 family cell polarity regulator [Source:HGNC Symbol;Acc:16051]                                                   | -0.95 | 3.7E-07 |
| NLRC5     | ENSG00000140853 | NLR family, CARD domain containing 5 [Source:HGNC Symbol;Acc:29933]                                                   | -0.82 | 3.7E-07 |
| LINC01137 | ENSG00000233621 | long intergenic non-protein coding RNA 1137 [Source:HGNC Symbol;Acc:49453]                                            | -0.98 | 3.7E-07 |
| CTSD      | ENSG00000117984 | cathepsin D [Source:HGNC Symbol;Acc:2529]                                                                             | -1.31 | 3.8E-07 |
| HRCT1     | ENSG00000196196 | histidine rich carboxyl terminus 1 [Source:HGNC Symbol;Acc:33872]                                                     | -1.12 | 3.8E-07 |
| KAT2B     | ENSG00000114166 | K(lysine) acetyltransferase 2B [Source:HGNC Symbol;Acc:8638]                                                          | -1.43 | 3.8E-07 |
| C9orf169  | ENSG00000197191 | chromosome 9 open reading frame 169 [Source:HGNC Symbol;Acc:30529]                                                    | -1.32 | 3.8E-07 |
| ATG2A     | ENSG00000110046 | autophagy related 2A [Source:HGNC Symbol;Acc:29028]                                                                   | -1.22 | 3.9E-07 |
| RTN4      | ENSG00000115310 | reticulon 4 [Source:HGNC Symbol;Acc:14085]                                                                            | -0.81 | 4.0E-07 |
| TBC1D22A  | ENSG00000054611 | TBC1 domain family, member 22A [Source:HGNC Symbol;Acc:1309]                                                          | -0.81 | 4.1E-07 |
| GULP1     | ENSG00000144366 | GULP, engulfment adaptor PTB domain containing 1 [Source:HGNC Symbol;Acc:18649]                                       | -1.27 | 4.1E-07 |
| HIF1A     | ENSG00000100644 | hypoxia inducible factor 1, alpha subunit (basic helix-loop-helix transcription factor) [Source:HGNC Symbol;Acc:4910] | -1.23 | 4.1E-07 |

|          |                 |                                                                                     |       |         |
|----------|-----------------|-------------------------------------------------------------------------------------|-------|---------|
| AMPD3    | ENSG00000133805 | adenosine monophosphate deaminase 3 [Source:HGNC Symbol;Acc:470]                    | -0.71 | 4.2E-07 |
| BZW1     | ENSG00000082153 | basic leucine zipper and W2 domains 1 [Source:HGNC Symbol;Acc:18380]                | -1.00 | 4.2E-07 |
| SPTAN1   | ENSG00000197694 | spectrin, alpha, non-erythrocytic 1 [Source:HGNC Symbol;Acc:11273]                  | -0.71 | 4.3E-07 |
| DSG2     | ENSG00000046604 | desmoglein 2 [Source:HGNC Symbol;Acc:3049]                                          | -1.18 | 4.4E-07 |
| MESDC1   | ENSG00000140406 | mesoderm development candidate 1 [Source:HGNC Symbol;Acc:13519]                     | -0.94 | 4.6E-07 |
| MAVS     | ENSG00000088888 | mitochondrial antiviral signaling protein [Source:HGNC Symbol;Acc:29233]            | -0.98 | 4.6E-07 |
| --       | ENSG00000235772 | --                                                                                  | -1.53 | 4.6E-07 |
| MAP3K13  | ENSG00000073803 | mitogen-activated protein kinase kinase kinase 13 [Source:HGNC Symbol;Acc:6852]     | -0.87 | 4.6E-07 |
| CARD6    | ENSG00000132357 | caspace recruitment domain family, member 6 [Source:HGNC Symbol;Acc:16394]          | -1.03 | 4.7E-07 |
| --       | ENSG00000269988 | --                                                                                  | -0.96 | 4.8E-07 |
| KMO      | ENSG00000117009 | kynurenine 3-monooxygenase (kynurenine 3-hydroxylase) [Source:HGNC Symbol;Acc:6381] | -1.14 | 4.9E-07 |
| WNT4     | ENSG00000162552 | wingless-type MMTV integration site family, member 4 [Source:HGNC Symbol;Acc:12783] | -2.18 | 4.9E-07 |
| CLASP1   | ENSG00000074054 | cytoplasmic linker associated protein 1 [Source:HGNC Symbol;Acc:17088]              | -0.74 | 4.9E-07 |
| NYNRIN   | ENSG00000205978 | NYN domain and retroviral integrase containing [Source:HGNC Symbol;Acc:20165]       | -0.77 | 5.0E-07 |
| BCAP29   | ENSG00000075790 | B-cell receptor-associated protein 29 [Source:HGNC Symbol;Acc:24131]                | -1.05 | 5.0E-07 |
| GMIP     | ENSG00000089639 | GEM interacting protein [Source:HGNC Symbol;Acc:24852]                              | -1.12 | 5.0E-07 |
| TRAF3IP2 | ENSG00000056972 | TRAF3 interacting protein 2 [Source:HGNC Symbol;Acc:1343]                           | -0.82 | 5.0E-07 |

|           |                 |                                                                                                                         |       |         |
|-----------|-----------------|-------------------------------------------------------------------------------------------------------------------------|-------|---------|
| FAM86DP   | ENSG00000244026 | family with sequence similarity 86, member D, pseudogene<br>[Source:HGNC Symbol;Acc:32659]                              | -0.75 | 5.1E-07 |
| MAP2K3    | ENSG00000034152 | mitogen-activated protein kinase kinase 3 [Source:HGNC<br>Symbol;Acc:6843]                                              | -0.96 | 5.1E-07 |
| --        | ENSG00000267165 | --                                                                                                                      | -0.84 | 5.1E-07 |
| TAB3      | ENSG00000157625 | TGF-beta activated kinase 1/MAP3K7 binding protein 3 [Source:HGNC<br>Symbol;Acc:30681]                                  | -0.97 | 5.1E-07 |
| AHNAK2    | ENSG00000185567 | AHNAK nucleoprotein 2 [Source:HGNC Symbol;Acc:20125]                                                                    | -0.94 | 5.2E-07 |
| COX6B2    | ENSG00000160471 | cytochrome c oxidase subunit VIb polypeptide 2 (testis) [Source:HGNC<br>Symbol;Acc:24380]                               | -1.25 | 5.2E-07 |
| CPEB2     | ENSG00000137449 | cytoplasmic polyadenylation element binding protein 2 [Source:HGNC<br>Symbol;Acc:21745]                                 | -1.21 | 5.2E-07 |
| OASL      | ENSG00000135114 | 2'-5'-oligoadenylate synthetase-like [Source:HGNC Symbol;Acc:8090]                                                      | -1.01 | 5.3E-07 |
| CYP4F3    | ENSG00000186529 | cytochrome P450, family 4, subfamily F, polypeptide 3 [Source:HGNC<br>Symbol;Acc:2646]                                  | -1.45 | 5.3E-07 |
| SPTBN2    | ENSG00000173898 | spectrin, beta, non-erythrocytic 2 [Source:HGNC Symbol;Acc:11276]                                                       | -0.98 | 5.4E-07 |
| WDR26     | ENSG00000162923 | WD repeat domain 26 [Source:HGNC Symbol;Acc:21208]                                                                      | -0.77 | 5.4E-07 |
| TM2D2     | ENSG00000169490 | TM2 domain containing 2 [Source:HGNC Symbol;Acc:24127]                                                                  | -0.61 | 5.4E-07 |
| MMP24-AS1 | ENSG00000126005 | MMP24 antisense RNA 1 [Source:HGNC Symbol;Acc:44421]                                                                    | -1.22 | 5.4E-07 |
| SP100     | ENSG00000067066 | SP100 nuclear antigen [Source:HGNC Symbol;Acc:11206]                                                                    | -0.93 | 5.5E-07 |
| IMPA1     | ENSG00000133731 | inositol(myo)-1(or 4)-monophosphatase 1 [Source:HGNC<br>Symbol;Acc:6050]                                                | -1.14 | 5.5E-07 |
| SP110     | ENSG00000135899 | SP110 nuclear body protein [Source:HGNC Symbol;Acc:5401]                                                                | -0.94 | 5.6E-07 |
| TAOK3     | ENSG00000135090 | TAO kinase 3 [Source:HGNC Symbol;Acc:18133]                                                                             | -0.96 | 5.7E-07 |
| ATXN1     | ENSG00000124788 | ataxin 1 [Source:HGNC Symbol;Acc:10548]                                                                                 | -0.97 | 5.8E-07 |
| BDKRB1    | ENSG00000100739 | bradykinin receptor B1 [Source:HGNC Symbol;Acc:1029]                                                                    | -1.74 | 5.8E-07 |
| TRPC4AP   | ENSG00000100991 | transient receptor potential cation channel, subfamily C, member 4<br>associated protein [Source:HGNC Symbol;Acc:16181] | -0.72 | 5.9E-07 |

|        |                 |                                                                                                                                                |       |         |
|--------|-----------------|------------------------------------------------------------------------------------------------------------------------------------------------|-------|---------|
| CYP4F2 | ENSG00000186115 | cytochrome P450, family 4, subfamily F, polypeptide 2 [Source:HGNC Symbol;Acc:2645]                                                            | -1.46 | 5.9E-07 |
| MINK1  | ENSG00000141503 | misshapen-like kinase 1 [Source:HGNC Symbol;Acc:17565]                                                                                         | -0.88 | 6.0E-07 |
| ITGB5  | ENSG00000082781 | integrin, beta 5 [Source:HGNC Symbol;Acc:6160]                                                                                                 | -0.83 | 6.0E-07 |
| MET    | ENSG00000105976 | met proto-oncogene [Source:HGNC Symbol;Acc:7029]                                                                                               | -1.03 | 6.0E-07 |
| MAPK13 | ENSG00000156711 | mitogen-activated protein kinase 13 [Source:HGNC Symbol;Acc:6875]                                                                              | -0.73 | 6.0E-07 |
| --     | ENSG00000251537 | Uncharacterized protein [Source:UniProtKB/TrEMBL;Acc:H0Y626]                                                                                   | -1.97 | 6.1E-07 |
| LSR    | ENSG00000105699 | lipolysis stimulated lipoprotein receptor [Source:HGNC Symbol;Acc:29572]                                                                       | -1.16 | 6.1E-07 |
| RELA   | ENSG00000173039 | v-rel avian reticuloendotheliosis viral oncogene homolog A [Source:HGNC Symbol;Acc:9955]                                                       | -0.82 | 6.3E-07 |
| HADHA  | ENSG00000084754 | hydroxyacyl-CoA dehydrogenase/3-ketoacyl-CoA thiolase/enoyl-CoA hydratase (trifunctional protein), alpha subunit [Source:HGNC Symbol;Acc:4801] | -0.65 | 6.4E-07 |
| TPP1   | ENSG00000166340 | tripeptidyl peptidase I [Source:HGNC Symbol;Acc:2073]                                                                                          | -0.73 | 6.4E-07 |
| UGP2   | ENSG00000169764 | UDP-glucose pyrophosphorylase 2 [Source:HGNC Symbol;Acc:12527]                                                                                 | -0.98 | 6.4E-07 |
| CMTM3  | ENSG00000140931 | CKLF-like MARVEL transmembrane domain containing 3 [Source:HGNC Symbol;Acc:19174]                                                              | -1.53 | 6.5E-07 |
| CACFD1 | ENSG00000160325 | calcium channel flower domain containing 1 [Source:HGNC Symbol;Acc:1365]                                                                       | -1.27 | 6.5E-07 |
| BAG3   | ENSG00000151929 | BCL2-associated athanogene 3 [Source:HGNC Symbol;Acc:939]                                                                                      | -0.67 | 6.5E-07 |
| WWC3   | ENSG00000047644 | WWC family member 3 [Source:HGNC Symbol;Acc:29237]                                                                                             | -0.76 | 6.6E-07 |
| RAB24  | ENSG00000169228 | RAB24, member RAS oncogene family [Source:HGNC Symbol;Acc:9765]                                                                                | -1.35 | 6.6E-07 |
| CD63   | ENSG00000135404 | CD63 molecule [Source:HGNC Symbol;Acc:1692]                                                                                                    | -0.85 | 6.8E-07 |
| CARD10 | ENSG00000100065 | caspase recruitment domain family, member 10 [Source:HGNC Symbol;Acc:16422]                                                                    | -1.20 | 6.8E-07 |
| FRMD8  | ENSG00000126391 | FERM domain containing 8 [Source:HGNC Symbol;Acc:25462]                                                                                        | -1.02 | 6.9E-07 |
| CAPNS1 | ENSG00000126247 | calpain, small subunit 1 [Source:HGNC Symbol;Acc:1481]                                                                                         | -0.83 | 6.9E-07 |

|          |                 |                                                                                                 |       |         |
|----------|-----------------|-------------------------------------------------------------------------------------------------|-------|---------|
| C18orf8  | ENSG00000141452 | chromosome 18 open reading frame 8 [Source:HGNC Symbol;Acc:24326]                               | -0.94 | 7.0E-07 |
| PPAP2A   | ENSG00000067113 | phosphatidic acid phosphatase type 2A [Source:HGNC Symbol;Acc:9228]                             | -0.68 | 7.2E-07 |
| APAF1    | ENSG00000120868 | apoptotic peptidase activating factor 1 [Source:HGNC Symbol;Acc:576]                            | -0.83 | 7.3E-07 |
| DYNLT1   | ENSG00000146425 | dynein, light chain, Tctex-type 1 [Source:HGNC Symbol;Acc:11697]                                | -0.68 | 7.3E-07 |
| KIAA0232 | ENSG00000170871 | KIAA0232 [Source:HGNC Symbol;Acc:28992]                                                         | -0.79 | 7.5E-07 |
| DDIT4    | ENSG00000168209 | DNA-damage-inducible transcript 4 [Source:HGNC Symbol;Acc:24944]                                | -1.04 | 7.6E-07 |
| FAM107B  | ENSG00000065809 | family with sequence similarity 107, member B [Source:HGNC Symbol;Acc:23726]                    | -1.01 | 7.6E-07 |
| SEC31A   | ENSG00000138674 | SEC31 homolog A ( <i>S. cerevisiae</i> ) [Source:HGNC Symbol;Acc:17052]                         | -0.68 | 7.6E-07 |
| SLC6A7   | ENSG00000011083 | solute carrier family 6 (neurotransmitter transporter), member 7 [Source:HGNC Symbol;Acc:11054] | -1.42 | 7.9E-07 |
| KCP      | ENSG00000135253 | kielin/chordin-like protein [Source:HGNC Symbol;Acc:17585]                                      | -1.11 | 8.1E-07 |
| COL28A1  | ENSG00000215018 | collagen, type XXVIII, alpha 1 [Source:HGNC Symbol;Acc:22442]                                   | -0.95 | 8.2E-07 |
| GCGR     | ENSG00000215644 | glucagon receptor [Source:HGNC Symbol;Acc:4192]                                                 | -2.09 | 8.2E-07 |
| ANTXR2   | ENSG00000163297 | anthrax toxin receptor 2 [Source:HGNC Symbol;Acc:21732]                                         | -1.14 | 8.5E-07 |
| PTPN1    | ENSG00000196396 | protein tyrosine phosphatase, non-receptor type 1 [Source:HGNC Symbol;Acc:9642]                 | -0.68 | 8.6E-07 |
| GRB10    | ENSG00000106070 | growth factor receptor-bound protein 10 [Source:HGNC Symbol;Acc:4564]                           | -0.65 | 8.6E-07 |
| ASAP1    | ENSG00000153317 | ArfGAP with SH3 domain, ankyrin repeat and PH domain 1 [Source:HGNC Symbol;Acc:2720]            | -1.10 | 8.8E-07 |
| ANXA13   | ENSG00000104537 | annexin A13 [Source:HGNC Symbol;Acc:536]                                                        | -1.14 | 8.8E-07 |
| RHOBTB1  | ENSG00000072422 | Rho-related BTB domain containing 1 [Source:HGNC Symbol;Acc:18738]                              | -1.52 | 9.0E-07 |

|         |                 |                                                                                                                                         |       |         |
|---------|-----------------|-----------------------------------------------------------------------------------------------------------------------------------------|-------|---------|
| FAM83G  | ENSG00000188522 | family with sequence similarity 83, member G [Source:HGNC Symbol;Acc:32554]                                                             | -1.09 | 9.0E-07 |
| --      | ENSG00000269926 | --                                                                                                                                      | -0.98 | 9.0E-07 |
| NEU1    | ENSG00000204386 | sialidase 1 (lysosomal sialidase) [Source:HGNC Symbol;Acc:7758]                                                                         | -0.73 | 9.0E-07 |
| INSIG2  | ENSG00000125629 | insulin induced gene 2 [Source:HGNC Symbol;Acc:20452]                                                                                   | -0.86 | 9.1E-07 |
| MICA    | ENSG00000204520 | MHC class I polypeptide-related sequence A [Source:HGNC Symbol;Acc:7090]                                                                | -0.88 | 9.1E-07 |
| MILR1   | ENSG00000271605 | mast cell immunoglobulin-like receptor 1 [Source:HGNC Symbol;Acc:27570]                                                                 | -1.21 | 9.3E-07 |
| UBE2B   | ENSG00000119048 | ubiquitin-conjugating enzyme E2B [Source:HGNC Symbol;Acc:12473]                                                                         | -0.95 | 9.3E-07 |
| B3GNT2  | ENSG00000170340 | UDP-GlcNAc:betaGal beta-1,3-N-acetylglucosaminyltransferase 2 [Source:HGNC Symbol;Acc:15629]                                            | -1.02 | 9.4E-07 |
| SLC27A4 | ENSG00000167114 | solute carrier family 27 (fatty acid transporter), member 4 [Source:HGNC Symbol;Acc:10998]                                              | -0.97 | 9.5E-07 |
| CEP170B | ENSG00000099814 | centrosomal protein 170B [Source:HGNC Symbol;Acc:20362]                                                                                 | -1.16 | 9.6E-07 |
| TCP11L2 | ENSG00000166046 | t-complex 11, testis-specific-like 2 [Source:HGNC Symbol;Acc:28627]                                                                     | -1.14 | 9.6E-07 |
| --      | ENSG00000254815 | --                                                                                                                                      | -1.34 | 9.7E-07 |
| ITSN2   | ENSG00000198399 | intersectin 2 [Source:HGNC Symbol;Acc:6184]                                                                                             | -1.00 | 9.7E-07 |
| AHDC1   | ENSG00000126705 | AT hook, DNA binding motif, containing 1 [Source:HGNC Symbol;Acc:25230]                                                                 | -0.90 | 9.8E-07 |
| GPR132  | ENSG00000183484 | G protein-coupled receptor 132 [Source:HGNC Symbol;Acc:17482]                                                                           | -1.27 | 9.8E-07 |
| GTF2B   | ENSG00000137947 | general transcription factor IIB [Source:HGNC Symbol;Acc:4648]                                                                          | -0.76 | 9.9E-07 |
| TAB2    | ENSG00000055208 | TGF-beta activated kinase 1/MAP3K7 binding protein 2 [Source:HGNC Symbol;Acc:17075]                                                     | -1.01 | 1.0E-06 |
| PPFIA1  | ENSG00000131626 | protein tyrosine phosphatase, receptor type, f polypeptide (PTPRF), interacting protein (liprin), alpha 1 [Source:HGNC Symbol;Acc:9245] | -0.68 | 1.0E-06 |
| --      | ENSG00000182319 | Tyrosine-protein kinase Sgk223 [Source:UniProtKB/Swiss-Prot;Acc:Q86YV5]                                                                 | -0.73 | 1.0E-06 |
| ANKRD50 | ENSG00000151458 | ankyrin repeat domain 50 [Source:HGNC Symbol;Acc:29223]                                                                                 | -1.11 | 1.0E-06 |

|         |                 |                                                                                        |       |         |
|---------|-----------------|----------------------------------------------------------------------------------------|-------|---------|
| STXBP5  | ENSG00000164506 | syntaxin binding protein 5 (tomosyn) [Source:HGNC Symbol;Acc:19665]                    | -1.07 | 1.0E-06 |
| S100A4  | ENSG00000196154 | S100 calcium binding protein A4 [Source:HGNC Symbol;Acc:10494]                         | -0.81 | 1.0E-06 |
| GBA2    | ENSG00000070610 | glucosidase, beta (bile acid) 2 [Source:HGNC Symbol;Acc:18986]                         | -0.88 | 1.1E-06 |
| --      | ENSG00000225964 | --                                                                                     | -1.90 | 1.1E-06 |
| IRS2    | ENSG00000185950 | insulin receptor substrate 2 [Source:HGNC Symbol;Acc:6126]                             | -1.17 | 1.1E-06 |
| LDLRAP1 | ENSG00000157978 | low density lipoprotein receptor adaptor protein 1 [Source:HGNC Symbol;Acc:18640]      | -0.78 | 1.1E-06 |
| IL1RAP  | ENSG00000196083 | interleukin 1 receptor accessory protein [Source:HGNC Symbol;Acc:5995]                 | -1.09 | 1.1E-06 |
| SETX    | ENSG00000107290 | senataxin [Source:HGNC Symbol;Acc:445]                                                 | -0.70 | 1.1E-06 |
| MIR221  | ENSG00000207870 | microRNA 221 [Source:HGNC Symbol;Acc:31601]                                            | -2.12 | 1.1E-06 |
| STXBP2  | ENSG00000076944 | syntaxin binding protein 2 [Source:HGNC Symbol;Acc:11445]                              | -1.20 | 1.1E-06 |
| WDR13   | ENSG00000101940 | WD repeat domain 13 [Source:HGNC Symbol;Acc:14352]                                     | -1.10 | 1.1E-06 |
| --      | ENSG00000244491 | --                                                                                     | -1.19 | 1.1E-06 |
| TMCC1   | ENSG00000172765 | transmembrane and coiled-coil domain family 1 [Source:HGNC Symbol;Acc:29116]           | -0.82 | 1.1E-06 |
| CALML4  | ENSG00000129007 | calmodulin-like 4 [Source:HGNC Symbol;Acc:18445]                                       | -0.76 | 1.1E-06 |
| SAMD4A  | ENSG00000020577 | sterile alpha motif domain containing 4A [Source:HGNC Symbol;Acc:23023]                | -0.82 | 1.1E-06 |
| APOL6   | ENSG00000221963 | apolipoprotein L, 6 [Source:HGNC Symbol;Acc:14870]                                     | -0.97 | 1.1E-06 |
| --      | ENSG00000261332 | --                                                                                     | -2.92 | 1.2E-06 |
| SPAG4   | ENSG00000061656 | sperm associated antigen 4 [Source:HGNC Symbol;Acc:11214]                              | -0.99 | 1.2E-06 |
| MARK2   | ENSG00000072518 | MAP/microtubule affinity-regulating kinase 2 [Source:HGNC Symbol;Acc:3332]             | -0.86 | 1.2E-06 |
| SI      | ENSG00000090402 | sucrase-isomaltase (alpha-glucosidase) [Source:HGNC Symbol;Acc:10856]                  | -1.53 | 1.2E-06 |
| PIP5K1A | ENSG00000143398 | phosphatidylinositol-4-phosphate 5-kinase, type I, alpha [Source:HGNC Symbol;Acc:8994] | -0.67 | 1.2E-06 |



|          |                 |                                                                                                                                     |       |         |
|----------|-----------------|-------------------------------------------------------------------------------------------------------------------------------------|-------|---------|
| FBXO6    | ENSG00000116663 | F-box protein 6 [Source:HGNC Symbol;Acc:13585]<br>eukaryotic translation initiation factor 4E family member 3                       | -1.04 | 1.2E-06 |
| EIF4E3   | ENSG00000163412 | [Source:HGNC Symbol;Acc:31837]<br>pleckstrin homology domain containing, family H (with MyTH4                                       | -0.87 | 1.2E-06 |
| PLEKHH3  | ENSG00000068137 | domain) member 3 [Source:HGNC Symbol;Acc:26105]                                                                                     | -1.15 | 1.2E-06 |
| ZFAND5   | ENSG00000107372 | zinc finger, AN1-type domain 5 [Source:HGNC Symbol;Acc:13008]<br>suppressor of variegation 4-20 homolog 1 (Drosophila) [Source:HGNC | -0.78 | 1.2E-06 |
| SUV420H1 | ENSG00000110066 | Symbol;Acc:24283]                                                                                                                   | -0.75 | 1.2E-06 |
| LARGE    | ENSG00000133424 | like-glycosyltransferase [Source:HGNC Symbol;Acc:6511]<br>breast carcinoma amplified sequence 1 [Source:HGNC                        | -0.73 | 1.2E-06 |
| BCAS1    | ENSG00000064787 | Symbol;Acc:974]                                                                                                                     | -0.96 | 1.3E-06 |
| DRAM2    | ENSG00000156171 | DNA-damage regulated autophagy modulator 2 [Source:HGNC<br>Symbol;Acc:28769]                                                        | -0.77 | 1.3E-06 |
| AIFM2    | ENSG00000042286 | apoptosis-inducing factor, mitochondrion-associated, 2 [Source:HGNC<br>Symbol;Acc:21411]                                            | -0.92 | 1.3E-06 |
| ACOT11   | ENSG00000162390 | acyl-CoA thioesterase 11 [Source:HGNC Symbol;Acc:18156]                                                                             | -1.05 | 1.3E-06 |
| MXRA8    | ENSG00000162576 | matrix-remodelling associated 8 [Source:HGNC Symbol;Acc:7542]                                                                       | -1.47 | 1.3E-06 |
| --       | ENSG00000229502 | --                                                                                                                                  | -1.66 | 1.3E-06 |
| KIAA0556 | ENSG00000047578 | KIAA0556 [Source:HGNC Symbol;Acc:29068]<br>Bifunctional heparan sulfate N-deacetylase/N-sulfotransferase 2                          | -0.68 | 1.3E-06 |
| --       | ENSG00000272916 | [Source:UniProtKB/TrEMBL;Acc:S4R438]<br>cerebellar degeneration-related protein 2-like [Source:HGNC                                 | -1.29 | 1.3E-06 |
| CDR2L    | ENSG00000109089 | Symbol;Acc:29999]                                                                                                                   | -0.91 | 1.4E-06 |
| CDYL     | ENSG00000153046 | chromodomain protein, Y-like [Source:HGNC Symbol;Acc:1811]                                                                          | -0.77 | 1.4E-06 |
| SYT5     | ENSG00000129990 | synaptotagmin V [Source:HGNC Symbol;Acc:11513]<br>wingless-type MMTV integration site family, member 7B                             | -2.80 | 1.4E-06 |
| WNT7B    | ENSG00000188064 | [Source:HGNC Symbol;Acc:12787]                                                                                                      | -0.88 | 1.4E-06 |
| ZMYND8   | ENSG00000101040 | zinc finger, MYND-type containing 8 [Source:HGNC Symbol;Acc:9397]                                                                   | -0.64 | 1.4E-06 |

|          |                 |                                                                                                                             |       |         |
|----------|-----------------|-----------------------------------------------------------------------------------------------------------------------------|-------|---------|
| RAB3GAP1 | ENSG00000115839 | RAB3 GTPase activating protein subunit 1 (catalytic) [Source:HGNC Symbol;Acc:17063]                                         | -0.77 | 1.4E-06 |
| SGPL1    | ENSG00000166224 | sphingosine-1-phosphate lyase 1 [Source:HGNC Symbol;Acc:10817]                                                              | -0.74 | 1.4E-06 |
| COL9A2   | ENSG00000049089 | collagen, type IX, alpha 2 [Source:HGNC Symbol;Acc:2218]                                                                    | -1.48 | 1.4E-06 |
| ZNF189   | ENSG00000136870 | zinc finger protein 189 [Source:HGNC Symbol;Acc:12980]                                                                      | -0.76 | 1.4E-06 |
| NEURL3   | ENSG00000163121 | neuralized E3 ubiquitin protein ligase 3 [Source:HGNC Symbol;Acc:25162]                                                     | -1.27 | 1.5E-06 |
| CDKN2A   | ENSG00000147889 | cyclin-dependent kinase inhibitor 2A [Source:HGNC Symbol;Acc:1787]                                                          | -1.31 | 1.5E-06 |
| GALNT1   | ENSG00000141429 | UDP-N-acetyl-alpha-D-galactosamine:polypeptide N-acetylglucosaminyltransferase 1 (GalNAc-T1) [Source:HGNC Symbol;Acc:4123]  | -1.12 | 1.5E-06 |
| SOWAHB   | ENSG00000186212 | sosondowah ankyrin repeat domain family member B [Source:HGNC Symbol;Acc:32958]                                             | -1.36 | 1.5E-06 |
| ZER1     | ENSG00000160445 | zyg-11 related, cell cycle regulator [Source:HGNC Symbol;Acc:30960]                                                         | -0.81 | 1.5E-06 |
| CD151    | ENSG00000177697 | CD151 molecule (Raph blood group) [Source:HGNC Symbol;Acc:1630]                                                             | -0.90 | 1.5E-06 |
| SERPINE2 | ENSG00000135919 | serpin peptidase inhibitor, clade E (nexin, plasminogen activator inhibitor type 1), member 2 [Source:HGNC Symbol;Acc:8951] | -0.70 | 1.5E-06 |
| RASA4    | ENSG00000105808 | RAS p21 protein activator 4 [Source:HGNC Symbol;Acc:23181]                                                                  | -0.97 | 1.5E-06 |
| HYI      | ENSG00000178922 | hydroxypyruvate isomerase (putative) [Source:HGNC Symbol;Acc:26948]                                                         | -1.11 | 1.6E-06 |
| PI4K2A   | ENSG00000155252 | phosphatidylinositol 4-kinase type 2 alpha [Source:HGNC Symbol;Acc:30031]                                                   | -0.85 | 1.6E-06 |
| CLCN1    | ENSG00000188037 | chloride channel, voltage-sensitive 1 [Source:HGNC Symbol;Acc:2019]                                                         | -1.57 | 1.6E-06 |
| HPSE     | ENSG00000173083 | heparanase [Source:HGNC Symbol;Acc:5164]                                                                                    | -0.90 | 1.6E-06 |
| RIPK4    | ENSG00000183421 | receptor-interacting serine-threonine kinase 4 [Source:HGNC Symbol;Acc:496]                                                 | -0.98 | 1.6E-06 |

|           |                 |                                                                                           |       |         |
|-----------|-----------------|-------------------------------------------------------------------------------------------|-------|---------|
| ATP2B1    | ENSG00000070961 | ATPase, Ca <sup>++</sup> transporting, plasma membrane 1 [Source:HGNC Symbol;Acc:814]     | -0.91 | 1.6E-06 |
| ATXN7L3   | ENSG00000087152 | ataxin 7-like 3 [Source:HGNC Symbol;Acc:25416]                                            | -0.77 | 1.6E-06 |
| HSD11B2   | ENSG00000176387 | hydroxysteroid (11-beta) dehydrogenase 2 [Source:HGNC Symbol;Acc:5209]                    | -1.09 | 1.6E-06 |
| PITRM1    | ENSG00000107959 | pitrilysin metallopeptidase 1 [Source:HGNC Symbol;Acc:17663]                              | -0.59 | 1.6E-06 |
| TBC1D10A  | ENSG00000099992 | TBC1 domain family, member 10A [Source:HGNC Symbol;Acc:23609]                             | -1.17 | 1.6E-06 |
| --        | ENSG00000257452 | --                                                                                        | -1.20 | 1.6E-06 |
| CDV3      | ENSG00000091527 | CDV3 homolog (mouse) [Source:HGNC Symbol;Acc:26928]                                       | -0.81 | 1.7E-06 |
| PDZK1     | ENSG00000174827 | PDZ domain containing 1 [Source:HGNC Symbol;Acc:8821]                                     | -1.12 | 1.7E-06 |
| S100P     | ENSG00000163993 | S100 calcium binding protein P [Source:HGNC Symbol;Acc:10504]                             | -0.89 | 1.7E-06 |
| BCL2L2    | ENSG00000129473 | BCL2-like 2 [Source:HGNC Symbol;Acc:995]                                                  | -0.67 | 1.7E-06 |
| ARHGDI    | ENSG00000141522 | Rho GDP dissociation inhibitor (GDI) alpha [Source:HGNC Symbol;Acc:678]                   | -1.11 | 1.7E-06 |
| ZNF702P   | ENSG00000242779 | zinc finger protein 702, pseudogene [Source:HGNC Symbol;Acc:25775]                        | -1.18 | 1.7E-06 |
| EPB41L5   | ENSG00000115109 | erythrocyte membrane protein band 4.1 like 5 [Source:HGNC Symbol;Acc:19819]               | -0.82 | 1.7E-06 |
| RARG      | ENSG00000172819 | retinoic acid receptor, gamma [Source:HGNC Symbol;Acc:9866]                               | -0.88 | 1.8E-06 |
| TNFRSF12A | ENSG00000006327 | tumor necrosis factor receptor superfamily, member 12A [Source:HGNC Symbol;Acc:18152]     | -1.11 | 1.8E-06 |
| EPB41L1   | ENSG00000088367 | erythrocyte membrane protein band 4.1-like 1 [Source:HGNC Symbol;Acc:3378]                | -0.56 | 1.8E-06 |
| MAPKAPK2  | ENSG00000162889 | mitogen-activated protein kinase-activated protein kinase 2 [Source:HGNC Symbol;Acc:6887] | -0.71 | 1.8E-06 |
| --        | ENSG00000255182 | --                                                                                        | -1.60 | 1.8E-06 |
| GCSAM     | ENSG00000174500 | germinal center-associated, signaling and motility [Source:HGNC Symbol;Acc:20253]         | -1.08 | 1.8E-06 |
| TOM1L2    | ENSG00000175662 | target of myb1-like 2 (chicken) [Source:HGNC Symbol;Acc:11984]                            | -0.90 | 1.8E-06 |

|          |                 |                                                                                                                               |       |         |
|----------|-----------------|-------------------------------------------------------------------------------------------------------------------------------|-------|---------|
| CARHSP1  | ENSG00000153048 | calcium regulated heat stable protein 1, 24kDa [Source:HGNC Symbol;Acc:17150]                                                 | -0.75 | 1.8E-06 |
| SAA4     | ENSG00000148965 | serum amyloid A4, constitutive [Source:HGNC Symbol;Acc:10516]                                                                 | -1.93 | 1.8E-06 |
| ARHGAP1  | ENSG00000175220 | Rho GTPase activating protein 1 [Source:HGNC Symbol;Acc:673]                                                                  | -0.76 | 1.9E-06 |
| DDIT3    | ENSG00000175197 | DNA-damage-inducible transcript 3 [Source:HGNC Symbol;Acc:2726]                                                               | -1.10 | 1.9E-06 |
| NIT1     | ENSG00000158793 | nitrilase 1 [Source:HGNC Symbol;Acc:7828]                                                                                     | -0.76 | 1.9E-06 |
| IGF2BP2  | ENSG00000073792 | insulin-like growth factor 2 mRNA binding protein 2 [Source:HGNC Symbol;Acc:28867]                                            | -0.78 | 1.9E-06 |
| ANK3     | ENSG00000151150 | ankyrin 3, node of Ranvier (ankyrin G) [Source:HGNC Symbol;Acc:494]                                                           | -1.20 | 1.9E-06 |
| SAV1     | ENSG00000151748 | salvador homolog 1 (Drosophila) [Source:HGNC Symbol;Acc:17795]                                                                | -1.06 | 1.9E-06 |
| KLK6     | ENSG00000167755 | kallikrein-related peptidase 6 [Source:HGNC Symbol;Acc:6367]                                                                  | -0.67 | 1.9E-06 |
| HERPUD1  | ENSG00000051108 | homocysteine-inducible, endoplasmic reticulum stress-inducible, ubiquitin-like domain member 1 [Source:HGNC Symbol;Acc:13744] | -0.82 | 1.9E-06 |
| TNFSF10  | ENSG00000121858 | tumor necrosis factor (ligand) superfamily, member 10 [Source:HGNC Symbol;Acc:11925]                                          | -1.33 | 2.0E-06 |
| SHH      | ENSG00000164690 | sonic hedgehog [Source:HGNC Symbol;Acc:10848]                                                                                 | -0.91 | 2.0E-06 |
| --       | ENSG00000262211 | --                                                                                                                            | -1.64 | 2.0E-06 |
| MAPK8    | ENSG00000107643 | mitogen-activated protein kinase 8 [Source:HGNC Symbol;Acc:6881]                                                              | -0.88 | 2.0E-06 |
| VPS37B   | ENSG00000139722 | vacuolar protein sorting 37 homolog B (S. cerevisiae) [Source:HGNC Symbol;Acc:25754]                                          | -0.88 | 2.0E-06 |
| TBX19    | ENSG00000143178 | T-box 19 [Source:HGNC Symbol;Acc:11596]                                                                                       | -1.16 | 2.0E-06 |
| MARVELD2 | ENSG00000152939 | MARVEL domain containing 2 [Source:HGNC Symbol;Acc:26401]                                                                     | -0.82 | 2.0E-06 |
| TET3     | ENSG00000187605 | tet methylcytosine dioxygenase 3 [Source:HGNC Symbol;Acc:28313]                                                               | -0.65 | 2.1E-06 |
| HIST1H3E | ENSG00000196966 | histone cluster 1, H3e [Source:HGNC Symbol;Acc:4769]                                                                          | -1.40 | 2.1E-06 |
| ABHD12B  | ENSG00000131969 | abhydrolase domain containing 12B [Source:HGNC Symbol;Acc:19837]                                                              | -0.66 | 2.1E-06 |
| ANXA3    | ENSG00000138772 | annexin A3 [Source:HGNC Symbol;Acc:541]                                                                                       | -0.95 | 2.1E-06 |
| TOM1     | ENSG00000100284 | target of myb1 (chicken) [Source:HGNC Symbol;Acc:11982]                                                                       | -1.08 | 2.1E-06 |

|         |                 |                                                                                                           |       |         |
|---------|-----------------|-----------------------------------------------------------------------------------------------------------|-------|---------|
| FAM126B | ENSG00000155744 | family with sequence similarity 126, member B [Source:HGNC Symbol;Acc:28593]                              | -1.11 | 2.1E-06 |
| MGAT1   | ENSG00000131446 | mannosyl (alpha-1,3-)-glycoprotein beta-1,2-N-acetylglucosaminyltransferase [Source:HGNC Symbol;Acc:7044] | -0.79 | 2.1E-06 |
| RMND5A  | ENSG00000153561 | required for meiotic nuclear division 5 homolog A ( <i>S. cerevisiae</i> ) [Source:HGNC Symbol;Acc:25850] | -0.81 | 2.1E-06 |
| BLCAP   | ENSG00000166619 | bladder cancer associated protein [Source:HGNC Symbol;Acc:1055]                                           | -0.63 | 2.1E-06 |
| IDS     | ENSG00000010404 | iduronate 2-sulfatase [Source:HGNC Symbol;Acc:5389]                                                       | -0.91 | 2.1E-06 |
| RPN2    | ENSG00000118705 | ribophorin II [Source:HGNC Symbol;Acc:10382]                                                              | -0.70 | 2.2E-06 |
| --      | ENSG00000259357 | --                                                                                                        | -0.68 | 2.2E-06 |
| MXI1    | ENSG00000119950 | MAX interactor 1, dimerization protein [Source:HGNC Symbol;Acc:7534]                                      | -1.17 | 2.2E-06 |
| WLS     | ENSG00000116729 | wntless Wnt ligand secretion mediator [Source:HGNC Symbol;Acc:30238]                                      | -0.69 | 2.2E-06 |
| MB21D2  | ENSG00000180611 | Mab-21 domain containing 2 [Source:HGNC Symbol;Acc:30438]                                                 | -1.18 | 2.2E-06 |
| MYH9    | ENSG00000100345 | myosin, heavy chain 9, non-muscle [Source:HGNC Symbol;Acc:7579]                                           | -0.66 | 2.2E-06 |
| GPR153  | ENSG00000158292 | G protein-coupled receptor 153 [Source:HGNC Symbol;Acc:23618]                                             | -0.91 | 2.2E-06 |
| SERINC1 | ENSG00000111897 | serine incorporator 1 [Source:HGNC Symbol;Acc:13464]                                                      | -1.03 | 2.2E-06 |
| UBXN11  | ENSG00000158062 | UBX domain protein 11 [Source:HGNC Symbol;Acc:30600]                                                      | -1.36 | 2.2E-06 |
| FLCN    | ENSG00000154803 | folliculin [Source:HGNC Symbol;Acc:27310]                                                                 | -0.74 | 2.3E-06 |
| ITFG1   | ENSG00000129636 | integrin alpha FG-GAP repeat containing 1 [Source:HGNC Symbol;Acc:30697]                                  | -1.05 | 2.3E-06 |
| RALGAPB | ENSG00000170471 | Ral GTPase activating protein, beta subunit (non-catalytic) [Source:HGNC Symbol;Acc:29221]                | -0.76 | 2.3E-06 |
| TAPSAR1 | ENSG00000204261 | TAP1 and PSMB8 antisense RNA 1 [Source:HGNC Symbol;Acc:39758]                                             | -0.75 | 2.3E-06 |
| CCL15   | ENSG00000267596 | chemokine (C-C motif) ligand 15 [Source:HGNC Symbol;Acc:10613]                                            | -1.43 | 2.3E-06 |
| COBL    | ENSG00000106078 | cordons-bleus WH2 repeat protein [Source:HGNC Symbol;Acc:22199]                                           | -0.81 | 2.3E-06 |
| HN1     | ENSG00000189159 | hematological and neurological expressed 1 [Source:HGNC Symbol;Acc:14569]                                 | -0.67 | 2.3E-06 |

|           |                 |                                                                                                    |       |         |
|-----------|-----------------|----------------------------------------------------------------------------------------------------|-------|---------|
| PCBP1-AS1 | ENSG00000179818 | PCBP1 antisense RNA 1 [Source:HGNC Symbol;Acc:42948]                                               | -0.63 | 2.3E-06 |
| ITM2B     | ENSG00000136156 | integral membrane protein 2B [Source:HGNC Symbol;Acc:6174]                                         | -0.78 | 2.4E-06 |
| BNIP3L    | ENSG00000104765 | BCL2/adenovirus E1B 19kDa interacting protein 3-like [Source:HGNC Symbol;Acc:1085]                 | -1.09 | 2.4E-06 |
| PKIG      | ENSG00000168734 | protein kinase (cAMP-dependent, catalytic) inhibitor gamma [Source:HGNC Symbol;Acc:9019]           | -0.79 | 2.4E-06 |
| H3F3B     | ENSG00000132475 | H3 histone, family 3B (H3.3B) [Source:HGNC Symbol;Acc:4765]                                        | -0.57 | 2.4E-06 |
| ARF4      | ENSG00000168374 | ADP-ribosylation factor 4 [Source:HGNC Symbol;Acc:655]                                             | -0.67 | 2.5E-06 |
| SYNGR3    | ENSG00000127561 | synaptogyrin 3 [Source:HGNC Symbol;Acc:11501]                                                      | -1.16 | 2.5E-06 |
| GINM1     | ENSG00000055211 | glycoprotein integral membrane 1 [Source:HGNC Symbol;Acc:21074]                                    | -0.92 | 2.5E-06 |
| CHMP1A    | ENSG00000131165 | charged multivesicular body protein 1A [Source:HGNC Symbol;Acc:8740]                               | -0.96 | 2.5E-06 |
| PNRC1     | ENSG00000146278 | proline-rich nuclear receptor coactivator 1 [Source:HGNC Symbol;Acc:17278]                         | -0.89 | 2.5E-06 |
| --        | ENSG00000267282 | --                                                                                                 | -1.51 | 2.5E-06 |
| SLK       | ENSG00000065613 | STE20-like kinase [Source:HGNC Symbol;Acc:11088]                                                   | -1.06 | 2.6E-06 |
| NT5E      | ENSG00000135318 | 5'-nucleotidase, ecto (CD73) [Source:HGNC Symbol;Acc:8021]                                         | -1.08 | 2.6E-06 |
| ATP6V0D1  | ENSG00000159720 | ATPase, H <sup>+</sup> transporting, lysosomal 38kDa, V0 subunit d1 [Source:HGNC Symbol;Acc:13724] | -0.86 | 2.6E-06 |
| ZNF841    | ENSG00000197608 | zinc finger protein 841 [Source:HGNC Symbol;Acc:27611]                                             | -0.76 | 2.7E-06 |
| RSPH3     | ENSG00000130363 | radial spoke 3 homolog (Chlamydomonas) [Source:HGNC Symbol;Acc:21054]                              | -0.81 | 2.7E-06 |
| TADA2B    | ENSG00000173011 | transcriptional adaptor 2B [Source:HGNC Symbol;Acc:30781]                                          | -0.66 | 2.7E-06 |
| SLC26A6   | ENSG00000225697 | solute carrier family 26 (anion exchanger), member 6 [Source:HGNC Symbol;Acc:14472]                | -0.82 | 2.7E-06 |
| PPP1CA    | ENSG00000172531 | protein phosphatase 1, catalytic subunit, alpha isozyme [Source:HGNC Symbol;Acc:9281]              | -0.76 | 2.7E-06 |
| CYP2S1    | ENSG00000167600 | cytochrome P450, family 2, subfamily S, polypeptide 1 [Source:HGNC Symbol;Acc:15654]               | -0.79 | 2.7E-06 |

|          |                 |                                                                                           |       |         |
|----------|-----------------|-------------------------------------------------------------------------------------------|-------|---------|
| EDEM1    | ENSG00000134109 | ER degradation enhancer, mannosidase alpha-like 1 [Source:HGNC Symbol;Acc:18967]          | -0.95 | 2.7E-06 |
| ARL8B    | ENSG00000134108 | ADP-ribosylation factor-like 8B [Source:HGNC Symbol;Acc:25564]                            | -0.87 | 2.7E-06 |
| --       | ENSG00000204876 | Uncharacterized protein [Source:UniProtKB/TrEMBL;Acc:E9PBC9]                              | -0.77 | 2.8E-06 |
| PLEKHN1  | ENSG00000187583 | pleckstrin homology domain containing, family N member 1 [Source:HGNC Symbol;Acc:25284]   | -1.29 | 2.8E-06 |
| ARHGEF16 | ENSG00000130762 | Rho guanine nucleotide exchange factor (GEF) 16 [Source:HGNC Symbol;Acc:15515]            | -1.09 | 2.8E-06 |
| AGFG1    | ENSG00000173744 | ArfGAP with FG repeats 1 [Source:HGNC Symbol;Acc:5175]                                    | -0.83 | 2.8E-06 |
| COG5     | ENSG00000164597 | component of oligomeric golgi complex 5 [Source:HGNC Symbol;Acc:14857]                    | -0.78 | 2.8E-06 |
| MAPRE2   | ENSG00000166974 | microtubule-associated protein, RP/EB family, member 2 [Source:HGNC Symbol;Acc:6891]      | -0.75 | 2.8E-06 |
| LMO2     | ENSG00000135363 | LIM domain only 2 (rhombotin-like 1) [Source:HGNC Symbol;Acc:6642]                        | -1.36 | 2.9E-06 |
| SWT1     | ENSG00000116668 | SWT1 RNA endoribonuclease homolog ( <i>S. cerevisiae</i> ) [Source:HGNC Symbol;Acc:16785] | -1.22 | 2.9E-06 |
| MLPH     | ENSG00000115648 | melanophilin [Source:HGNC Symbol;Acc:29643]                                               | -0.90 | 2.9E-06 |
| ARF3     | ENSG00000134287 | ADP-ribosylation factor 3 [Source:HGNC Symbol;Acc:654]                                    | -0.50 | 2.9E-06 |
| TNS3     | ENSG00000136205 | tensin 3 [Source:HGNC Symbol;Acc:21616]                                                   | -0.69 | 2.9E-06 |
| RPS6KA1  | ENSG00000117676 | ribosomal protein S6 kinase, 90kDa, polypeptide 1 [Source:HGNC Symbol;Acc:10430]          | -0.82 | 2.9E-06 |
| APLP2    | ENSG00000084234 | amyloid beta (A4) precursor-like protein 2 [Source:HGNC Symbol;Acc:598]                   | -0.69 | 3.0E-06 |
| CLK3     | ENSG00000179335 | CDC-like kinase 3 [Source:HGNC Symbol;Acc:2071]                                           | -0.79 | 3.0E-06 |
| SERPINB6 | ENSG00000124570 | serpin peptidase inhibitor, clade B (ovalbumin), member 6 [Source:HGNC Symbol;Acc:8950]   | -0.64 | 3.0E-06 |
| CYLD     | ENSG00000083799 | cylindromatosis (turban tumor syndrome) [Source:HGNC Symbol;Acc:2584]                     | -0.93 | 3.0E-06 |

|          |                 |                                                                                                                                              |       |         |
|----------|-----------------|----------------------------------------------------------------------------------------------------------------------------------------------|-------|---------|
| SSH3     | ENSG00000172830 | slingshot protein phosphatase 3 [Source:HGNC Symbol;Acc:30581]<br>SUN domain containing ossification factor [Source:HGNC<br>Symbol;Acc:1240] | -0.89 | 3.1E-06 |
| SUCO     | ENSG00000094975 | cytoplasmic FMR1 interacting protein 1 [Source:HGNC<br>Symbol;Acc:13759]                                                                     | -0.86 | 3.1E-06 |
| CYFIP1   | ENSG00000068793 | exocyst complex component 7 [Source:HGNC Symbol;Acc:23214]                                                                                   | -0.56 | 3.2E-06 |
| EXOC7    | ENSG00000182473 | microtubule-actin crosslinking factor 1 [Source:HGNC<br>Symbol;Acc:13664]                                                                    | -0.74 | 3.2E-06 |
| MACF1    | ENSG00000127603 | Uncharacterized protein [Source:UniProtKB/TrEMBL;Acc:K7ENX0]                                                                                 | -0.66 | 3.2E-06 |
| --       | ENSG00000266956 | cryptochrome 2 (photolyase-like) [Source:HGNC Symbol;Acc:2385]                                                                               | -1.77 | 3.2E-06 |
| CRY2     | ENSG00000121671 | inositol polyphosphate-4-phosphatase, type I, 107kDa [Source:HGNC<br>Symbol;Acc:6074]                                                        | -0.70 | 3.2E-06 |
| INPP4A   | ENSG00000040933 | N-myc downstream regulated 1 [Source:HGNC Symbol;Acc:7679]                                                                                   | -0.74 | 3.2E-06 |
| NDRG1    | ENSG00000104419 | ubiquitin specific peptidase 32 [Source:HGNC Symbol;Acc:19143]                                                                               | -1.18 | 3.2E-06 |
| USP32    | ENSG00000170832 | Yip1 domain family, member 1 [Source:HGNC Symbol;Acc:25231]                                                                                  | -0.84 | 3.3E-06 |
| YIPF1    | ENSG00000058799 | ATPase, class VI, type 11B [Source:HGNC Symbol;Acc:13553]                                                                                    | -0.69 | 3.3E-06 |
| ATP11B   | ENSG00000058063 | transmembrane protein 44 [Source:HGNC Symbol;Acc:25120]                                                                                      | -1.03 | 3.3E-06 |
| TMEM44   | ENSG00000145014 | phosphatidylinositol-4-phosphate 5-kinase, type I, beta [Source:HGNC<br>Symbol;Acc:8995]                                                     | -0.77 | 3.3E-06 |
| PIP5K1B  | ENSG00000107242 | KIAA1551 [Source:HGNC Symbol;Acc:25559]                                                                                                      | -1.11 | 3.4E-06 |
| KIAA1551 | ENSG00000174718 | Shwachman-Bodian-Diamond syndrome [Source:HGNC<br>Symbol;Acc:19440]                                                                          | -0.84 | 3.4E-06 |
| SBDS     | ENSG00000126524 | KIAA2026 [Source:HGNC Symbol;Acc:23378]                                                                                                      | -0.81 | 3.4E-06 |
| KIAA2026 | ENSG00000183354 | nuclear receptor coactivator 6 [Source:HGNC Symbol;Acc:15936]                                                                                | -0.85 | 3.4E-06 |
| NCOA6    | ENSG00000198646 | eukaryotic translation initiation factor 2-alpha kinase 3 [Source:HGNC<br>Symbol;Acc:3255]                                                   | -0.63 | 3.4E-06 |
| EIF2AK3  | ENSG00000172071 | MHC class I polypeptide-related sequence E (pseudogene)<br>[Source:HGNC Symbol;Acc:7094]                                                     | -0.73 | 3.4E-06 |
| MICE     | ENSG00000273340 |                                                                                                                                              | -1.57 | 3.4E-06 |



|           |                 |                                                                                                    |       |         |
|-----------|-----------------|----------------------------------------------------------------------------------------------------|-------|---------|
| LDHAP4    | ENSG00000214110 | lactate dehydrogenase A pseudogene 4 [Source:HGNC Symbol;Acc:6539]                                 | -1.10 | 3.5E-06 |
| BLZF1     | ENSG00000117475 | basic leucine zipper nuclear factor 1 [Source:HGNC Symbol;Acc:1065]                                | -1.01 | 3.5E-06 |
| GBA       | ENSG00000177628 | glucosidase, beta, acid [Source:HGNC Symbol;Acc:4177]                                              | -0.92 | 3.5E-06 |
| TLN1      | ENSG00000137076 | talin 1 [Source:HGNC Symbol;Acc:11845]                                                             | -0.76 | 3.5E-06 |
| ARID3B    | ENSG00000179361 | AT rich interactive domain 3B (BRIGHT-like) [Source:HGNC Symbol;Acc:14350]                         | -1.12 | 3.5E-06 |
| DCDC2B    | ENSG00000222046 | doublecortin domain containing 2B [Source:HGNC Symbol;Acc:32576]                                   | -1.18 | 3.6E-06 |
| HIST1H2BG | ENSG00000187990 | histone cluster 1, H2bg [Source:HGNC Symbol;Acc:4746]                                              | -1.51 | 3.6E-06 |
| --        | ENSG00000257653 | --                                                                                                 | -0.77 | 3.6E-06 |
| S100A10   | ENSG00000197747 | S100 calcium binding protein A10 [Source:HGNC Symbol;Acc:10487]                                    | -0.77 | 3.7E-06 |
| --        | ENSG00000236662 | --                                                                                                 | -1.12 | 3.7E-06 |
| ACP2      | ENSG00000134575 | acid phosphatase 2, lysosomal [Source:HGNC Symbol;Acc:123]                                         | -0.66 | 3.7E-06 |
| SHOC2     | ENSG00000108061 | soc-2 suppressor of clear homolog (C. elegans) [Source:HGNC Symbol;Acc:15454]                      | -0.98 | 3.7E-06 |
| AMIGO2    | ENSG00000139211 | adhesion molecule with Ig-like domain 2 [Source:HGNC Symbol;Acc:24073]                             | -1.02 | 3.8E-06 |
| PSMD6-AS2 | ENSG00000239653 | PSMD6 antisense RNA 2 [Source:HGNC Symbol;Acc:44125]                                               | -1.47 | 3.8E-06 |
| SLC2A6    | ENSG00000160326 | solute carrier family 2 (facilitated glucose transporter), member 6 [Source:HGNC Symbol;Acc:11011] | -1.21 | 3.9E-06 |
| TMEM229B  | ENSG00000198133 | transmembrane protein 229B [Source:HGNC Symbol;Acc:20130]                                          | -0.81 | 3.9E-06 |
| CASP9     | ENSG00000132906 | caspase 9, apoptosis-related cysteine peptidase [Source:HGNC Symbol;Acc:1511]                      | -0.97 | 3.9E-06 |
| --        | ENSG00000267555 | --                                                                                                 | -1.87 | 3.9E-06 |
| --        | ENSG00000251136 | --                                                                                                 | -0.80 | 3.9E-06 |
| DOPEY1    | ENSG00000083097 | dopey family member 1 [Source:HGNC Symbol;Acc:21194]                                               | -0.68 | 3.9E-06 |
| KLF2      | ENSG00000127528 | Kruppel-like factor 2 [Source:HGNC Symbol;Acc:6347]                                                | -1.24 | 3.9E-06 |
| --        | ENSG00000271020 | --                                                                                                 | -1.25 | 3.9E-06 |

|           |                 |                                                                                                           |       |         |
|-----------|-----------------|-----------------------------------------------------------------------------------------------------------|-------|---------|
| KPNA7     | ENSG00000185467 | karyopherin alpha 7 (importin alpha 8) [Source:HGNC Symbol;Acc:21839]                                     | -1.11 | 3.9E-06 |
| HPCAL1    | ENSG00000115756 | hippocalcin-like 1 [Source:HGNC Symbol;Acc:5145]                                                          | -0.90 | 4.0E-06 |
| CAMTA2    | ENSG00000108509 | calmodulin binding transcription activator 2 [Source:HGNC Symbol;Acc:18807]                               | -0.87 | 4.0E-06 |
| HERC6     | ENSG00000138642 | HECT and RLD domain containing E3 ubiquitin protein ligase family member 6 [Source:HGNC Symbol;Acc:26072] | -1.00 | 4.1E-06 |
| FRK       | ENSG00000111816 | fyn-related kinase [Source:HGNC Symbol;Acc:3955]                                                          | -1.03 | 4.2E-06 |
| PAFAH1B1  | ENSG00000007168 | platelet-activating factor acetylhydrolase 1b, regulatory subunit 1 (45kDa) [Source:HGNC Symbol;Acc:8574] | -0.73 | 4.2E-06 |
| KCNH2     | ENSG00000055118 | potassium voltage-gated channel, subfamily H (eag-related), member 2 [Source:HGNC Symbol;Acc:6251]        | -1.02 | 4.2E-06 |
| SLC17A5   | ENSG00000119899 | solute carrier family 17 (acidic sugar transporter), member 5 [Source:HGNC Symbol;Acc:10933]              | -0.91 | 4.3E-06 |
| TRIM40    | ENSG00000204614 | tripartite motif containing 40 [Source:HGNC Symbol;Acc:18736]                                             | -1.93 | 4.3E-06 |
| PARP4     | ENSG00000102699 | poly (ADP-ribose) polymerase family, member 4 [Source:HGNC Symbol;Acc:271]                                | -0.94 | 4.3E-06 |
| XPNPEP2   | ENSG00000122121 | X-prolyl aminopeptidase (aminopeptidase P) 2, membrane-bound [Source:HGNC Symbol;Acc:12823]               | -1.85 | 4.3E-06 |
| SLC8A2    | ENSG00000118160 | solute carrier family 8 (sodium/calcium exchanger), member 2 [Source:HGNC Symbol;Acc:11069]               | -1.39 | 4.3E-06 |
| --        | ENSG00000255498 | --                                                                                                        | -1.44 | 4.4E-06 |
| CAPZA1    | ENSG00000116489 | capping protein (actin filament) muscle Z-line, alpha 1 [Source:HGNC Symbol;Acc:1488]                     | -0.81 | 4.4E-06 |
| SSFA2     | ENSG00000138434 | sperm specific antigen 2 [Source:HGNC Symbol;Acc:11319]                                                   | -0.95 | 4.4E-06 |
| ELL2      | ENSG00000118985 | elongation factor, RNA polymerase II, 2 [Source:HGNC Symbol;Acc:17064]                                    | -0.88 | 4.4E-06 |
| HIST2H2BE | ENSG00000184678 | histone cluster 2, H2be [Source:HGNC Symbol;Acc:4760]                                                     | -0.92 | 4.5E-06 |
| SLC23A3   | ENSG00000213901 | solute carrier family 23, member 3 [Source:HGNC Symbol;Acc:20601]                                         | -1.17 | 4.5E-06 |

|          |                 |                                                                                      |       |         |
|----------|-----------------|--------------------------------------------------------------------------------------|-------|---------|
| HSD11B1  | ENSG00000117594 | hydroxysteroid (11-beta) dehydrogenase 1 [Source:HGNC Symbol;Acc:5208]               | -1.59 | 4.5E-06 |
| ARID3A   | ENSG00000116017 | AT rich interactive domain 3A (BRIGHT-like) [Source:HGNC Symbol;Acc:3031]            | -0.97 | 4.5E-06 |
| --       | ENSG00000228113 | --                                                                                   | -1.52 | 4.6E-06 |
| TRAF4    | ENSG00000076604 | TNF receptor-associated factor 4 [Source:HGNC Symbol;Acc:12034]                      | -1.00 | 4.6E-06 |
| RAB7A    | ENSG00000075785 | RAB7A, member RAS oncogene family [Source:HGNC Symbol;Acc:9788]                      | -0.55 | 4.6E-06 |
| STX18    | ENSG00000168818 | syntaxin 18 [Source:HGNC Symbol;Acc:15942]                                           | -0.57 | 4.6E-06 |
| GALE     | ENSG00000117308 | UDP-galactose-4-epimerase [Source:HGNC Symbol;Acc:4116]                              | -0.89 | 4.7E-06 |
| GIT2     | ENSG00000139436 | G protein-coupled receptor kinase interacting ArfGAP 2 [Source:HGNC Symbol;Acc:4273] | -0.64 | 4.7E-06 |
| MICU1    | ENSG00000107745 | mitochondrial calcium uptake 1 [Source:HGNC Symbol;Acc:1530]                         | -0.68 | 4.7E-06 |
| CARNS1   | ENSG00000172508 | carnosine synthase 1 [Source:HGNC Symbol;Acc:29268]                                  | -1.80 | 4.7E-06 |
| NRBP2    | ENSG00000185189 | nuclear receptor binding protein 2 [Source:HGNC Symbol;Acc:19339]                    | -0.84 | 4.8E-06 |
| --       | ENSG00000261687 | --                                                                                   | -0.72 | 4.9E-06 |
| C10orf12 | ENSG00000155640 | chromosome 10 open reading frame 12 [Source:HGNC Symbol;Acc:23420]                   | -0.95 | 5.1E-06 |
| SP1      | ENSG00000185591 | Sp1 transcription factor [Source:HGNC Symbol;Acc:11205]                              | -0.63 | 5.1E-06 |
| PLA2G12B | ENSG00000138308 | phospholipase A2, group XIIB [Source:HGNC Symbol;Acc:18555]                          | -1.84 | 5.1E-06 |
| DYSF     | ENSG00000135636 | dysferlin [Source:HGNC Symbol;Acc:3097]                                              | -1.63 | 5.2E-06 |
| PCGF3    | ENSG00000185619 | polycomb group ring finger 3 [Source:HGNC Symbol;Acc:10066]                          | -0.59 | 5.3E-06 |
| CYP2B6   | ENSG00000197408 | cytochrome P450, family 2, subfamily B, polypeptide 6 [Source:HGNC Symbol;Acc:2615]  | -0.96 | 5.3E-06 |
| MFSD6    | ENSG00000151690 | major facilitator superfamily domain containing 6 [Source:HGNC Symbol;Acc:24711]     | -0.89 | 5.3E-06 |
| ARRDC4   | ENSG00000140450 | arrestin domain containing 4 [Source:HGNC Symbol;Acc:28087]                          | -1.11 | 5.3E-06 |
| RNPEPL1  | ENSG00000142327 | arginyl aminopeptidase (aminopeptidase B)-like 1 [Source:HGNC Symbol;Acc:10079]      | -1.10 | 5.3E-06 |

|         |                 |                                                                                                                                    |       |         |
|---------|-----------------|------------------------------------------------------------------------------------------------------------------------------------|-------|---------|
| AATK    | ENSG00000181409 | apoptosis-associated tyrosine kinase [Source:HGNC Symbol;Acc:21]<br>G protein-coupled receptor, family C, group 5, member D        | -1.30 | 5.4E-06 |
| GPRC5D  | ENSG00000111291 | [Source:HGNC Symbol;Acc:13310]<br>discs, large (Drosophila) homolog-associated protein 4 [Source:HGNC                              | -1.72 | 5.5E-06 |
| DLGAP4  | ENSG00000080845 | Symbol;Acc:24476]                                                                                                                  | -0.77 | 5.6E-06 |
| EXT2    | ENSG00000151348 | exostosin glycosyltransferase 2 [Source:HGNC Symbol;Acc:3513]                                                                      | -0.74 | 5.6E-06 |
| ZNF432  | ENSG00000256087 | zinc finger protein 432 [Source:HGNC Symbol;Acc:20810]                                                                             | -0.93 | 5.6E-06 |
| N4BP3   | ENSG00000145911 | NEDD4 binding protein 3 [Source:HGNC Symbol;Acc:29852]<br>mitogen-activated protein kinase kinase 2 [Source:HGNC                   | -1.19 | 5.6E-06 |
| MAP2K2  | ENSG00000126934 | Symbol;Acc:6842]                                                                                                                   | -1.02 | 5.7E-06 |
| YPEL2   | ENSG00000175155 | yippee-like 2 (Drosophila) [Source:HGNC Symbol;Acc:18326]<br>autocrine motility factor receptor, E3 ubiquitin protein ligase       | -1.07 | 5.7E-06 |
| AMFR    | ENSG00000159461 | [Source:HGNC Symbol;Acc:463]<br>N-ethylmaleimide-sensitive factor attachment protein, gamma                                        | -0.64 | 5.9E-06 |
| NAPG    | ENSG00000134265 | [Source:HGNC Symbol;Acc:7642]                                                                                                      | -0.82 | 5.9E-06 |
| SLA2    | ENSG00000101082 | Src-like-adaptor 2 [Source:HGNC Symbol;Acc:17329]<br>T-cell, immune regulator 1, ATPase, H <sup>+</sup> transporting, lysosomal V0 | -0.58 | 5.9E-06 |
| TCIRG1  | ENSG00000110719 | subunit A3 [Source:HGNC Symbol;Acc:11647]<br>protein phosphatase 2, regulatory subunit B, delta [Source:HGNC                       | -1.17 | 5.9E-06 |
| PPP2R2D | ENSG00000175470 | Symbol;Acc:23732]<br>zinc finger, FYVE domain containing 26 [Source:HGNC                                                           | -0.67 | 6.0E-06 |
| ZFYVE26 | ENSG00000072121 | Symbol;Acc:20761]                                                                                                                  | -0.65 | 6.0E-06 |
| DGAT1   | ENSG00000185000 | diacylglycerol O-acyltransferase 1 [Source:HGNC Symbol;Acc:2843]                                                                   | -1.12 | 6.0E-06 |
| TFEB    | ENSG00000112561 | transcription factor EB [Source:HGNC Symbol;Acc:11753]                                                                             | -1.23 | 6.0E-06 |
| PCBP4   | ENSG00000090097 | poly(rC) binding protein 4 [Source:HGNC Symbol;Acc:8652]                                                                           | -1.15 | 6.1E-06 |
| TPST2   | ENSG00000128294 | tyrosylprotein sulfotransferase 2 [Source:HGNC Symbol;Acc:12021]<br>calmin (calponin-like, transmembrane) [Source:HGNC             | -0.66 | 6.1E-06 |
| CLMN    | ENSG00000165959 | Symbol;Acc:19972]                                                                                                                  | -0.86 | 6.1E-06 |

|            |                 |                                                                                                                  |       |         |
|------------|-----------------|------------------------------------------------------------------------------------------------------------------|-------|---------|
| FAM3A      | ENSG00000071889 | family with sequence similarity 3, member A [Source:HGNC Symbol;Acc:13749]                                       | -0.96 | 6.1E-06 |
| SLC30A10   | ENSG00000196660 | solute carrier family 30, member 10 [Source:HGNC Symbol;Acc:25355]                                               | -2.91 | 6.1E-06 |
| GAB1       | ENSG00000109458 | GRB2-associated binding protein 1 [Source:HGNC Symbol;Acc:4066]                                                  | -1.01 | 6.1E-06 |
| BCL2L13    | ENSG00000099968 | BCL2-like 13 (apoptosis facilitator) [Source:HGNC Symbol;Acc:17164]                                              | -0.59 | 6.1E-06 |
| FZD5       | ENSG00000163251 | frizzled family receptor 5 [Source:HGNC Symbol;Acc:4043]                                                         | -0.73 | 6.2E-06 |
| OR2A7      | ENSG00000243896 | olfactory receptor, family 2, subfamily A, member 7 [Source:HGNC Symbol;Acc:8234]                                | -1.88 | 6.2E-06 |
| C5orf30    | ENSG00000181751 | chromosome 5 open reading frame 30 [Source:HGNC Symbol;Acc:25052]                                                | -0.99 | 6.2E-06 |
| MIR24-2    | ENSG00000267519 | microRNA 24-2 [Source:HGNC Symbol;Acc:31608]                                                                     | -0.95 | 6.3E-06 |
| PGLYRP4    | ENSG00000163218 | peptidoglycan recognition protein 4 [Source:HGNC Symbol;Acc:30015]                                               | -1.00 | 6.3E-06 |
| PAOX       | ENSG00000148832 | polyamine oxidase (exo-N4-amino) [Source:HGNC Symbol;Acc:20837]                                                  | -0.96 | 6.5E-06 |
| FNBP1      | ENSG00000187239 | formin binding protein 1 [Source:HGNC Symbol;Acc:17069]                                                          | -1.00 | 6.5E-06 |
| HMCN2      | ENSG00000148357 | hemicentin 2 [Source:HGNC Symbol;Acc:21293]                                                                      | -2.09 | 6.5E-06 |
| --         | ENSG00000268475 | --                                                                                                               | -1.55 | 6.7E-06 |
| CDKN2B-AS1 | ENSG00000240498 | CDKN2B antisense RNA 1 [Source:HGNC Symbol;Acc:34341]                                                            | -1.44 | 6.7E-06 |
| MX2        | ENSG00000183486 | myxovirus (influenza virus) resistance 2 (mouse) [Source:HGNC Symbol;Acc:7533]                                   | -1.08 | 6.7E-06 |
| MX1        | ENSG00000157601 | myxovirus (influenza virus) resistance 1, interferon-inducible protein p78 (mouse) [Source:HGNC Symbol;Acc:7532] | -0.83 | 6.7E-06 |
| GCOM1      | ENSG00000137878 | GRINL1A complex locus 1 [Source:HGNC Symbol;Acc:26424]                                                           | -2.10 | 6.8E-06 |
| R3HCC1L    | ENSG00000166024 | R3H domain and coiled-coil containing 1-like [Source:HGNC Symbol;Acc:23512]                                      | -0.84 | 6.8E-06 |
| HMGCL      | ENSG00000117305 | 3-hydroxymethyl-3-methylglutaryl-CoA lyase [Source:HGNC Symbol;Acc:5005]                                         | -0.68 | 7.0E-06 |

|          |                 |                                                                                                 |       |         |
|----------|-----------------|-------------------------------------------------------------------------------------------------|-------|---------|
| SLC35A2  | ENSG00000102100 | solute carrier family 35 (UDP-galactose transporter), member A2 [Source:HGNC Symbol;Acc:11022]  | -0.71 | 7.1E-06 |
| PGAM2    | ENSG00000164708 | phosphoglycerate mutase 2 (muscle) [Source:HGNC Symbol;Acc:8889]                                | -1.54 | 7.3E-06 |
| WDR45B   | ENSG00000141580 | WD repeat domain 45B [Source:HGNC Symbol;Acc:25072]                                             | -0.54 | 7.3E-06 |
| FANK1    | ENSG00000203780 | fibronectin type III and ankyrin repeat domains 1 [Source:HGNC Symbol;Acc:23527]                | -1.20 | 7.3E-06 |
| YKT6     | ENSG00000106636 | YKT6 v-SNARE homolog ( <i>S. cerevisiae</i> ) [Source:HGNC Symbol;Acc:16959]                    | -0.81 | 7.3E-06 |
| --       | ENSG00000261553 | --                                                                                              | -2.07 | 7.4E-06 |
| SOS2     | ENSG00000100485 | son of sevenless homolog 2 ( <i>Drosophila</i> ) [Source:HGNC Symbol;Acc:11188]                 | -1.14 | 7.4E-06 |
| SLC22A31 | ENSG00000259803 | solute carrier family 22, member 31 [Source:HGNC Symbol;Acc:27091]                              | -2.27 | 7.5E-06 |
| MSLN     | ENSG00000102854 | mesothelin [Source:HGNC Symbol;Acc:7371]                                                        | -1.09 | 7.6E-06 |
| BNIP2    | ENSG00000140299 | BCL2/adenovirus E1B 19kDa interacting protein 2 [Source:HGNC Symbol;Acc:1083]                   | -0.90 | 7.7E-06 |
| ZCCHC24  | ENSG00000165424 | zinc finger, CCHC domain containing 24 [Source:HGNC Symbol;Acc:26911]                           | -0.89 | 7.7E-06 |
| ABAT     | ENSG00000183044 | 4-aminobutyrate aminotransferase [Source:HGNC Symbol;Acc:23]                                    | -1.30 | 7.8E-06 |
| TRIM14   | ENSG00000106785 | tripartite motif containing 14 [Source:HGNC Symbol;Acc:16283]                                   | -0.67 | 7.8E-06 |
| IGFN1    | ENSG00000163395 | immunoglobulin-like and fibronectin type III domain containing 1 [Source:HGNC Symbol;Acc:24607] | -2.11 | 7.9E-06 |
| SCEL     | ENSG00000136155 | sciellin [Source:HGNC Symbol;Acc:10573]                                                         | -1.22 | 8.1E-06 |
| TBC1D1   | ENSG00000065882 | TBC1 (tre-2/USP6, BUB2, cdc16) domain family, member 1 [Source:HGNC Symbol;Acc:11578]           | -0.66 | 8.1E-06 |
| PRKD2    | ENSG00000105287 | protein kinase D2 [Source:HGNC Symbol;Acc:17293]                                                | -0.95 | 8.1E-06 |
| TMEM8A   | ENSG00000129925 | transmembrane protein 8A [Source:HGNC Symbol;Acc:17205]                                         | -1.03 | 8.1E-06 |

|           |                 |                                                                                                       |       |         |
|-----------|-----------------|-------------------------------------------------------------------------------------------------------|-------|---------|
| UBE2J1    | ENSG00000198833 | ubiquitin-conjugating enzyme E2, J1 [Source:HGNC Symbol;Acc:17598]                                    | -0.71 | 8.1E-06 |
| MYO5B     | ENSG00000167306 | myosin VB [Source:HGNC Symbol;Acc:7603]                                                               | -0.96 | 8.1E-06 |
| LINC00854 | ENSG00000236383 | long intergenic non-protein coding RNA 854 [Source:HGNC Symbol;Acc:43658]                             | -1.38 | 8.2E-06 |
| ADIPOR1   | ENSG00000159346 | adiponectin receptor 1 [Source:HGNC Symbol;Acc:24040]                                                 | -0.57 | 8.3E-06 |
| RABGGTA   | ENSG00000100949 | Rab geranylgeranyltransferase, alpha subunit [Source:HGNC Symbol;Acc:9795]                            | -0.93 | 8.3E-06 |
| CCDC69    | ENSG00000198624 | coiled-coil domain containing 69 [Source:HGNC Symbol;Acc:24487]                                       | -1.07 | 8.4E-06 |
| --        | ENSG00000272100 | --                                                                                                    | -1.02 | 8.6E-06 |
| PPARG     | ENSG00000132170 | peroxisome proliferator-activated receptor gamma [Source:HGNC Symbol;Acc:9236]                        | -0.89 | 8.7E-06 |
| AVIL      | ENSG00000135407 | advillin [Source:HGNC Symbol;Acc:14188]                                                               | -1.10 | 8.9E-06 |
| VAPA      | ENSG00000101558 | VAMP (vesicle-associated membrane protein)-associated protein A, 33kDa [Source:HGNC Symbol;Acc:12648] | -0.75 | 9.0E-06 |
| SDR39U1   | ENSG00000100445 | short chain dehydrogenase/reductase family 39U, member 1 [Source:HGNC Symbol;Acc:20275]               | -0.57 | 9.2E-06 |
| DYRK2     | ENSG00000127334 | dual-specificity tyrosine-(Y)-phosphorylation regulated kinase 2 [Source:HGNC Symbol;Acc:3093]        | -0.96 | 9.2E-06 |
| PACS1     | ENSG00000175115 | phosphofurin acidic cluster sorting protein 1 [Source:HGNC Symbol;Acc:30032]                          | -0.72 | 9.2E-06 |
| INSR      | ENSG00000171105 | insulin receptor [Source:HGNC Symbol;Acc:6091]                                                        | -0.63 | 9.3E-06 |
| SLC46A3   | ENSG00000139508 | solute carrier family 46, member 3 [Source:HGNC Symbol;Acc:27501]                                     | -0.86 | 9.3E-06 |
| MFGE8     | ENSG00000140545 | milk fat globule-EGF factor 8 protein [Source:HGNC Symbol;Acc:7036]                                   | -1.03 | 9.4E-06 |
| MAP3K11   | ENSG00000173327 | mitogen-activated protein kinase kinase kinase 11 [Source:HGNC Symbol;Acc:6850]                       | -1.16 | 9.4E-06 |
| MCU       | ENSG00000156026 | mitochondrial calcium uniporter [Source:HGNC Symbol;Acc:23526]                                        | -0.74 | 9.5E-06 |
| HDAC7     | ENSG00000061273 | histone deacetylase 7 [Source:HGNC Symbol;Acc:14067]                                                  | -0.89 | 9.7E-06 |

|           |                 |                                                                                           |       |         |
|-----------|-----------------|-------------------------------------------------------------------------------------------|-------|---------|
| ALPP      | ENSG00000163283 | alkaline phosphatase, placental [Source:HGNC Symbol;Acc:439]                              | -1.12 | 9.8E-06 |
| --        | ENSG00000261780 | --                                                                                        | -1.08 | 9.9E-06 |
| RBM5      | ENSG00000003756 | RNA binding motif protein 5 [Source:HGNC Symbol;Acc:9902]                                 | -0.61 | 1.0E-05 |
| TNFRSF10A | ENSG00000104689 | tumor necrosis factor receptor superfamily, member 10a [Source:HGNC Symbol;Acc:11904]     | -0.69 | 1.0E-05 |
| TRNAU1AP  | ENSG00000180098 | tRNA selenocysteine 1 associated protein 1 [Source:HGNC Symbol;Acc:30813]                 | -0.76 | 1.0E-05 |
| ANXA2P2   | ENSG00000231991 | annexin A2 pseudogene 2 [Source:HGNC Symbol;Acc:539]                                      | -1.71 | 1.0E-05 |
| PAEP      | ENSG00000122133 | progestagen-associated endometrial protein [Source:HGNC Symbol;Acc:8573]                  | -1.02 | 1.0E-05 |
| NAPA      | ENSG00000105402 | N-ethylmaleimide-sensitive factor attachment protein, alpha [Source:HGNC Symbol;Acc:7641] | -0.81 | 1.0E-05 |
| RIPK2     | ENSG00000104312 | receptor-interacting serine-threonine kinase 2 [Source:HGNC Symbol;Acc:10020]             | -0.77 | 1.0E-05 |
| RAB1B     | ENSG00000174903 | RAB1B, member RAS oncogene family [Source:HGNC Symbol;Acc:18370]                          | -0.77 | 1.1E-05 |
| CCNI      | ENSG00000118816 | cyclin I [Source:HGNC Symbol;Acc:1595]                                                    | -1.06 | 1.1E-05 |
| STK40     | ENSG00000196182 | serine/threonine kinase 40 [Source:HGNC Symbol;Acc:21373]                                 | -0.95 | 1.1E-05 |
| ABI1      | ENSG00000136754 | abl-interactor 1 [Source:HGNC Symbol;Acc:11320]                                           | -0.77 | 1.1E-05 |
| ULBP2     | ENSG00000131015 | UL16 binding protein 2 [Source:HGNC Symbol;Acc:14894]                                     | -0.92 | 1.1E-05 |
| MDK       | ENSG00000110492 | midkine (neurite growth-promoting factor 2) [Source:HGNC Symbol;Acc:6972]                 | -0.94 | 1.1E-05 |
| ARL4A     | ENSG00000122644 | ADP-ribosylation factor-like 4A [Source:HGNC Symbol;Acc:695]                              | -0.89 | 1.1E-05 |
| --        | ENSG00000268292 | --                                                                                        | -0.88 | 1.1E-05 |
| NAPA-AS1  | ENSG00000268061 | NAPA antisense RNA 1 [Source:HGNC Symbol;Acc:44118]                                       | -0.91 | 1.1E-05 |
| LINC00483 | ENSG00000167117 | long intergenic non-protein coding RNA 483 [Source:HGNC Symbol;Acc:26080]                 | -0.93 | 1.1E-05 |
| FUT11     | ENSG00000196968 | fucosyltransferase 11 (alpha (1,3) fucosyltransferase) [Source:HGNC Symbol;Acc:19233]     | -0.91 | 1.1E-05 |



|           |                 |                                                                                                                        |       |         |
|-----------|-----------------|------------------------------------------------------------------------------------------------------------------------|-------|---------|
| MYO18A    | ENSG00000196535 | myosin XVIII A [Source:HGNC Symbol;Acc:31104]<br>inhibitor of growth family, member 2 [Source:HGNC<br>Symbol;Acc:6063] | -0.85 | 1.1E-05 |
| ING2      | ENSG00000168556 | Symbol;Acc:6063]                                                                                                       | -0.70 | 1.1E-05 |
| SNX11     | ENSG00000002919 | sorting nexin 11 [Source:HGNC Symbol;Acc:14975]                                                                        | -0.75 | 1.1E-05 |
| ADAM10    | ENSG00000137845 | ADAM metallopeptidase domain 10 [Source:HGNC Symbol;Acc:188]                                                           | -0.93 | 1.1E-05 |
| ZNF513    | ENSG00000163795 | zinc finger protein 513 [Source:HGNC Symbol;Acc:26498]                                                                 | -1.10 | 1.1E-05 |
| MFNG      | ENSG00000100060 | MFNG O-fucosylpeptide 3-beta-N-acetylglucosaminyltransferase<br>[Source:HGNC Symbol;Acc:7038]                          | -1.57 | 1.1E-05 |
| BRPF3     | ENSG00000096070 | bromodomain and PHD finger containing, 3 [Source:HGNC<br>Symbol;Acc:14256]                                             | -0.77 | 1.1E-05 |
| IKBKE     | ENSG00000143466 | inhibitor of kappa light polypeptide gene enhancer in B-cells, kinase<br>epsilon [Source:HGNC Symbol;Acc:14552]        | -0.76 | 1.1E-05 |
| CEBPG     | ENSG00000153879 | CCAAT/enhancer binding protein (C/EBP), gamma [Source:HGNC<br>Symbol;Acc:1837]                                         | -0.59 | 1.1E-05 |
| MTM1      | ENSG00000171100 | myotubularin 1 [Source:HGNC Symbol;Acc:7448]                                                                           | -1.07 | 1.2E-05 |
| IGFBP3    | ENSG00000146674 | insulin-like growth factor binding protein 3 [Source:HGNC<br>Symbol;Acc:5472]                                          | -1.31 | 1.2E-05 |
| MTRNR2L12 | ENSG00000269028 | MT-RNR2-like 12 (pseudogene) [Source:HGNC Symbol;Acc:37169]                                                            | -2.20 | 1.2E-05 |
| NME7      | ENSG00000143156 | NME/NM23 family member 7 [Source:HGNC Symbol;Acc:20461]                                                                | -0.94 | 1.2E-05 |
| GCH1      | ENSG00000131979 | GTP cyclohydrolase 1 [Source:HGNC Symbol;Acc:4193]                                                                     | -0.75 | 1.2E-05 |
| IL15RA    | ENSG00000134470 | interleukin 15 receptor, alpha [Source:HGNC Symbol;Acc:5978]                                                           | -0.76 | 1.2E-05 |
| --        | ENSG00000258150 | Uncharacterized protein [Source:UniProtKB/TrEMBL;Acc:F8VVB4]                                                           | -1.78 | 1.2E-05 |
| CARS-AS1  | ENSG00000247473 | CARS antisense RNA 1 [Source:HGNC Symbol;Acc:40125]                                                                    | -0.99 | 1.2E-05 |
| CTSA      | ENSG00000064601 | cathepsin A [Source:HGNC Symbol;Acc:9251]                                                                              | -0.68 | 1.2E-05 |
| --        | ENSG00000267551 | --                                                                                                                     | -1.30 | 1.2E-05 |
| GNG12     | ENSG00000172380 | guanine nucleotide binding protein (G protein), gamma 12<br>[Source:HGNC Symbol;Acc:19663]                             | -1.06 | 1.2E-05 |
| --        | ENSG00000224063 | --                                                                                                                     | -1.58 | 1.3E-05 |

|           |                 |                                                                                                |       |         |
|-----------|-----------------|------------------------------------------------------------------------------------------------|-------|---------|
| SHANK2    | ENSG00000162105 | SH3 and multiple ankyrin repeat domains 2 [Source:HGNC Symbol;Acc:14295]                       | -0.78 | 1.3E-05 |
| SSBP3     | ENSG00000157216 | single stranded DNA binding protein 3 [Source:HGNC Symbol;Acc:15674]                           | -0.51 | 1.3E-05 |
| WIPI1     | ENSG00000070540 | WD repeat domain, phosphoinositide interacting 1 [Source:HGNC Symbol;Acc:25471]                | -0.64 | 1.3E-05 |
| SERAC1    | ENSG00000122335 | serine active site containing 1 [Source:HGNC Symbol;Acc:21061]                                 | -0.83 | 1.3E-05 |
| PPP6R1    | ENSG00000105063 | protein phosphatase 6, regulatory subunit 1 [Source:HGNC Symbol;Acc:29195]                     | -0.83 | 1.3E-05 |
| KIRREL    | ENSG00000183853 | kin of IRRE like (Drosophila) [Source:HGNC Symbol;Acc:15734]                                   | -0.97 | 1.3E-05 |
| APH1A     | ENSG00000117362 | APH1A gamma secretase subunit [Source:HGNC Symbol;Acc:29509]                                   | -0.60 | 1.3E-05 |
| CREB3L1   | ENSG00000157613 | cAMP responsive element binding protein 3-like 1 [Source:HGNC Symbol;Acc:18856]                | -0.74 | 1.3E-05 |
| RPS6KA2   | ENSG00000071242 | ribosomal protein S6 kinase, 90kDa, polypeptide 2 [Source:HGNC Symbol;Acc:10431]               | -0.77 | 1.3E-05 |
| MED16     | ENSG00000175221 | mediator complex subunit 16 [Source:HGNC Symbol;Acc:17556]                                     | -1.15 | 1.3E-05 |
| SECISBP2L | ENSG00000138593 | SECIS binding protein 2-like [Source:HGNC Symbol;Acc:28997]                                    | -0.97 | 1.3E-05 |
| PFDN1     | ENSG00000113068 | prefoldin subunit 1 [Source:HGNC Symbol;Acc:8866]                                              | -0.54 | 1.3E-05 |
| OR52K3P   | ENSG00000225101 | olfactory receptor, family 52, subfamily K, member 3 pseudogene [Source:HGNC Symbol;Acc:15224] | -1.75 | 1.4E-05 |
| DPH3      | ENSG00000154813 | diphthamide biosynthesis 3 [Source:HGNC Symbol;Acc:27717]                                      | -0.75 | 1.4E-05 |
| CNEP1R1   | ENSG00000205423 | CTD nuclear envelope phosphatase 1 regulatory subunit 1 [Source:HGNC Symbol;Acc:26759]         | -0.76 | 1.4E-05 |
| CTNNAL1   | ENSG00000119326 | catenin (cadherin-associated protein), alpha-like 1 [Source:HGNC Symbol;Acc:2512]              | -0.90 | 1.4E-05 |
| PSEN2     | ENSG00000143801 | presenilin 2 (Alzheimer disease 4) [Source:HGNC Symbol;Acc:9509]                               | -0.77 | 1.4E-05 |
| LAMTOR3   | ENSG00000109270 | late endosomal/lysosomal adaptor, MAPK and MTOR activator 3 [Source:HGNC Symbol;Acc:15606]     | -0.80 | 1.4E-05 |
| --        | ENSG00000261367 | --                                                                                             | -1.80 | 1.4E-05 |

|         |                 |                                                                                                                       |       |         |
|---------|-----------------|-----------------------------------------------------------------------------------------------------------------------|-------|---------|
| SEC24D  | ENSG00000150961 | SEC24 family member D [Source:HGNC Symbol;Acc:10706]                                                                  | -0.75 | 1.4E-05 |
| SEPT8   | ENSG00000164402 | septin 8 [Source:HGNC Symbol;Acc:16511]                                                                               | -0.60 | 1.4E-05 |
| DNAJB2  | ENSG00000135924 | DnaJ (Hsp40) homolog, subfamily B, member 2 [Source:HGNC Symbol;Acc:5228]                                             | -0.97 | 1.4E-05 |
| --      | ENSG00000223458 | --                                                                                                                    | -2.75 | 1.4E-05 |
| KLHL34  | ENSG00000185915 | kelch-like family member 34 [Source:HGNC Symbol;Acc:26634]                                                            | -1.86 | 1.4E-05 |
| SEMA3C  | ENSG00000075223 | sema domain, immunoglobulin domain (Ig), short basic domain, secreted, (semaphorin) 3C [Source:HGNC Symbol;Acc:10725] | -1.18 | 1.5E-05 |
| --      | ENSG00000259773 | --                                                                                                                    | -1.57 | 1.5E-05 |
| --      | ENSG00000269145 | --                                                                                                                    | -1.16 | 1.5E-05 |
| EVPL    | ENSG00000167880 | envoplakin [Source:HGNC Symbol;Acc:3503]                                                                              | -0.95 | 1.5E-05 |
| --      | ENSG00000259409 | --                                                                                                                    | -1.35 | 1.5E-05 |
| FAM134B | ENSG00000154153 | family with sequence similarity 134, member B [Source:HGNC Symbol;Acc:25964]                                          | -1.07 | 1.5E-05 |
| SLC35C1 | ENSG00000181830 | solute carrier family 35 (GDP-fucose transporter), member C1 [Source:HGNC Symbol;Acc:20197]                           | -0.85 | 1.6E-05 |
| NEURL1B | ENSG00000214357 | neuralized E3 ubiquitin protein ligase 1B [Source:HGNC Symbol;Acc:35422]                                              | -0.54 | 1.6E-05 |
| CNKSR3  | ENSG00000153721 | CNKSR family member 3 [Source:HGNC Symbol;Acc:23034]                                                                  | -0.76 | 1.6E-05 |
| PPARA   | ENSG00000186951 | peroxisome proliferator-activated receptor alpha [Source:HGNC Symbol;Acc:9232]                                        | -0.65 | 1.6E-05 |
| OR7E14P | ENSG00000184669 | olfactory receptor, family 7, subfamily E, member 14 pseudogene [Source:HGNC Symbol;Acc:8385]                         | -1.00 | 1.6E-05 |
| SLC11A1 | ENSG00000018280 | solute carrier family 11 (proton-coupled divalent metal ion transporter), member 1 [Source:HGNC Symbol;Acc:10907]     | -1.16 | 1.6E-05 |
| MYO9B   | ENSG00000099331 | myosin IXB [Source:HGNC Symbol;Acc:7609]                                                                              | -0.88 | 1.6E-05 |
| ARPC1B  | ENSG00000130429 | actin related protein 2/3 complex, subunit 1B, 41kDa [Source:HGNC Symbol;Acc:704]                                     | -0.72 | 1.6E-05 |

|            |                 |                                                                                            |       |         |
|------------|-----------------|--------------------------------------------------------------------------------------------|-------|---------|
| FAM32A     | ENSG00000105058 | family with sequence similarity 32, member A [Source:HGNC Symbol;Acc:24563]                | -0.57 | 1.7E-05 |
| HUS1       | ENSG00000136273 | HUS1 checkpoint homolog (S. pombe) [Source:HGNC Symbol;Acc:5309]                           | -0.68 | 1.7E-05 |
| --         | ENSG00000254732 | --                                                                                         | -1.57 | 1.7E-05 |
| FTLP14     | ENSG00000260459 | ferritin, light polypeptide pseudogene 14 [Source:HGNC Symbol;Acc:37964]                   | -1.40 | 1.7E-05 |
| CCDC152    | ENSG00000198865 | coiled-coil domain containing 152 [Source:HGNC Symbol;Acc:34438]                           | -1.53 | 1.7E-05 |
| PLCB3      | ENSG00000149782 | phospholipase C, beta 3 (phosphatidylinositol-specific) [Source:HGNC Symbol;Acc:9056]      | -0.82 | 1.7E-05 |
| TCTEX1D4   | ENSG00000188396 | Tctex1 domain containing 4 [Source:HGNC Symbol;Acc:32315]                                  | -1.76 | 1.7E-05 |
| TIMP1      | ENSG00000102265 | TIMP metalloproteinase inhibitor 1 [Source:HGNC Symbol;Acc:11820]                          | -0.89 | 1.8E-05 |
| PGK1       | ENSG00000102144 | phosphoglycerate kinase 1 [Source:HGNC Symbol;Acc:8896]                                    | -0.81 | 1.8E-05 |
| ZFYVE27    | ENSG00000155256 | zinc finger, FYVE domain containing 27 [Source:HGNC Symbol;Acc:26559]                      | -0.83 | 1.8E-05 |
| ABHD12     | ENSG00000100997 | abhydrolase domain containing 12 [Source:HGNC Symbol;Acc:15868]                            | -0.56 | 1.8E-05 |
| CHMP5      | ENSG00000086065 | charged multivesicular body protein 5 [Source:HGNC Symbol;Acc:26942]                       | -0.85 | 1.8E-05 |
| MB         | ENSG00000198125 | myoglobin [Source:HGNC Symbol;Acc:6915]                                                    | -1.49 | 1.8E-05 |
| LEPROT     | ENSG00000213625 | leptin receptor overlapping transcript [Source:HGNC Symbol;Acc:29477]                      | -0.84 | 1.8E-05 |
| BHLHE40-AS | ENSG00000235831 | BHLHE40 antisense RNA 1 [Source:HGNC Symbol;Acc:44471]                                     | -1.44 | 1.8E-05 |
| ABCC5      | ENSG00000114770 | ATP-binding cassette, sub-family C (CFTR/MRP), member 5 [Source:HGNC Symbol;Acc:56]        | -0.72 | 1.9E-05 |
| --         | ENSG00000113811 | Selenoprotein K [Source:UniProtKB/Swiss-Prot;Acc:Q9Y6D0]                                   | -0.70 | 1.9E-05 |
| DNAJB11    | ENSG00000090520 | DnaJ (Hsp40) homolog, subfamily B, member 11 [Source:HGNC Symbol;Acc:14889]                | -0.57 | 1.9E-05 |
| MAF        | ENSG00000178573 | v-maf avian musculoaponeurotic fibrosarcoma oncogene homolog [Source:HGNC Symbol;Acc:6776] | -1.14 | 1.9E-05 |

|           |                 |                                                                                                     |       |         |
|-----------|-----------------|-----------------------------------------------------------------------------------------------------|-------|---------|
| LINC00520 | ENSG00000258791 | long intergenic non-protein coding RNA 520 [Source:HGNC Symbol;Acc:19843]                           | -1.39 | 1.9E-05 |
| MNT       | ENSG00000070444 | MAX network transcriptional repressor [Source:HGNC Symbol;Acc:7188]                                 | -0.75 | 1.9E-05 |
| --        | ENSG00000262831 | --                                                                                                  | -1.02 | 1.9E-05 |
| UBALD2    | ENSG00000185262 | UBA-like domain containing 2 [Source:HGNC Symbol;Acc:28438]                                         | -0.84 | 1.9E-05 |
| --        | ENSG00000238164 | --                                                                                                  | -0.99 | 1.9E-05 |
| C19orf10  | ENSG00000074842 | chromosome 19 open reading frame 10 [Source:HGNC Symbol;Acc:16948]                                  | -0.83 | 1.9E-05 |
| ZNF710    | ENSG00000140548 | zinc finger protein 710 [Source:HGNC Symbol;Acc:25352]                                              | -0.77 | 1.9E-05 |
| ETV7      | ENSG00000010030 | ets variant 7 [Source:HGNC Symbol;Acc:18160]                                                        | -0.59 | 2.0E-05 |
| CBLB      | ENSG00000114423 | Cbl proto-oncogene B, E3 ubiquitin protein ligase [Source:HGNC Symbol;Acc:1542]                     | -0.72 | 2.0E-05 |
| LEMD2     | ENSG00000161904 | LEM domain containing 2 [Source:HGNC Symbol;Acc:21244]                                              | -0.70 | 2.0E-05 |
| --        | ENSG00000227484 | --                                                                                                  | -1.58 | 2.0E-05 |
| ATG9A     | ENSG00000198925 | autophagy related 9A [Source:HGNC Symbol;Acc:22408]                                                 | -0.77 | 2.0E-05 |
| MSANTD3   | ENSG00000066697 | Myb/SANT-like DNA-binding domain containing 3 [Source:HGNC Symbol;Acc:23370]                        | -0.78 | 2.0E-05 |
| LRG1      | ENSG00000171236 | leucine-rich alpha-2-glycoprotein 1 [Source:HGNC Symbol;Acc:29480]                                  | -0.78 | 2.0E-05 |
| ABCC13    | ENSG00000243064 | ATP-binding cassette, sub-family C (CFTR/MRP), member 13, pseudogene [Source:HGNC Symbol;Acc:16022] | -1.69 | 2.1E-05 |
| FDPS      | ENSG00000160752 | farnesyl diphosphate synthase [Source:HGNC Symbol;Acc:3631]                                         | -0.57 | 2.1E-05 |
| DSP       | ENSG00000096696 | desmoplakin [Source:HGNC Symbol;Acc:3052]                                                           | -0.72 | 2.1E-05 |
| --        | ENSG00000266114 | --                                                                                                  | -1.57 | 2.1E-05 |
| FHDC1     | ENSG00000137460 | FH2 domain containing 1 [Source:HGNC Symbol;Acc:29363]                                              | -0.64 | 2.1E-05 |
| DERL2     | ENSG00000072849 | derlin 2 [Source:HGNC Symbol;Acc:17943]                                                             | -0.57 | 2.1E-05 |
| GLRA4     | ENSG00000188828 | glycine receptor, alpha 4 [Source:HGNC Symbol;Acc:31715]                                            | -2.04 | 2.1E-05 |
| PDPK1     | ENSG00000140992 | 3-phosphoinositide dependent protein kinase-1 [Source:HGNC Symbol;Acc:8816]                         | -0.57 | 2.1E-05 |

|           |                 |                                                                                                                                        |       |         |
|-----------|-----------------|----------------------------------------------------------------------------------------------------------------------------------------|-------|---------|
| SLC16A9   | ENSG00000165449 | solute carrier family 16, member 9 [Source:HGNC Symbol;Acc:23520]<br>potassium voltage-gated channel, Shal-related subfamily, member 3 | -0.97 | 2.2E-05 |
| KCND3     | ENSG00000171385 | [Source:HGNC Symbol;Acc:6239]                                                                                                          | -2.68 | 2.2E-05 |
| INO80C    | ENSG00000153391 | INO80 complex subunit C [Source:HGNC Symbol;Acc:26994]                                                                                 | -0.83 | 2.2E-05 |
| SURF4     | ENSG00000148248 | surfeit 4 [Source:HGNC Symbol;Acc:11476]                                                                                               | -0.61 | 2.2E-05 |
| SLC17A4   | ENSG00000146039 | solute carrier family 17, member 4 [Source:HGNC Symbol;Acc:10932]<br>wingless-type MMTV integration site family, member 9A             | -0.85 | 2.2E-05 |
| WNT9A     | ENSG00000143816 | [Source:HGNC Symbol;Acc:12778]<br>chromosome 6 open reading frame 141 [Source:HGNC                                                     | -1.28 | 2.2E-05 |
| C6orf141  | ENSG00000197261 | Symbol;Acc:21351]<br>solute carrier family 25, member 45 [Source:HGNC                                                                  | -0.70 | 2.3E-05 |
| SLC25A45  | ENSG00000162241 | Symbol;Acc:27442]                                                                                                                      | -0.99 | 2.3E-05 |
| IL17REL   | ENSG00000188263 | interleukin 17 receptor E-like [Source:HGNC Symbol;Acc:33808]<br>long intergenic non-protein coding RNA 543 [Source:HGNC               | -2.75 | 2.3E-05 |
| LINC00543 | ENSG00000260704 | Symbol;Acc:43678]                                                                                                                      | -0.96 | 2.3E-05 |
| ARF1      | ENSG00000143761 | ADP-ribosylation factor 1 [Source:HGNC Symbol;Acc:652]                                                                                 | -0.61 | 2.3E-05 |
| --        | ENSG00000229299 | --                                                                                                                                     | -1.16 | 2.3E-05 |
| MIR192    | ENSG00000207648 | microRNA 192 [Source:HGNC Symbol;Acc:31562]                                                                                            | -1.52 | 2.3E-05 |
| KIF1B     | ENSG00000054523 | kinesin family member 1B [Source:HGNC Symbol;Acc:16636]<br>sialic acid binding Ig-like lectin 12 (gene/pseudogene) [Source:HGNC        | -0.73 | 2.4E-05 |
| SIGLEC12  | ENSG00000254521 | Symbol;Acc:15482]<br>CDC42 binding protein kinase gamma (DMPK-like) [Source:HGNC                                                       | -1.89 | 2.4E-05 |
| CDC42BPG  | ENSG00000171219 | Symbol;Acc:29829]                                                                                                                      | -0.88 | 2.4E-05 |
| TNK1      | ENSG00000174292 | tyrosine kinase, non-receptor, 1 [Source:HGNC Symbol;Acc:11940]                                                                        | -0.86 | 2.4E-05 |
| TPT1-AS1  | ENSG00000170919 | TPT1 antisense RNA 1 [Source:HGNC Symbol;Acc:43686]<br>secretory carrier membrane protein 2 [Source:HGNC                               | -0.77 | 2.4E-05 |
| SCAMP2    | ENSG00000140497 | Symbol;Acc:10564]<br>dehydrodolichyl diphosphate synthase [Source:HGNC                                                                 | -0.74 | 2.4E-05 |
| DHDDS     | ENSG00000117682 | Symbol;Acc:20603]                                                                                                                      | -0.73 | 2.4E-05 |

|          |                 |                                                                                               |       |         |
|----------|-----------------|-----------------------------------------------------------------------------------------------|-------|---------|
| THEMIS2  | ENSG00000130775 | thymocyte selection associated family member 2 [Source:HGNC Symbol;Acc:16839]                 | -0.98 | 2.4E-05 |
| ABHD3    | ENSG00000158201 | abhydrolase domain containing 3 [Source:HGNC Symbol;Acc:18718]                                | -0.82 | 2.4E-05 |
| ABHD5    | ENSG00000011198 | abhydrolase domain containing 5 [Source:HGNC Symbol;Acc:21396]                                | -0.69 | 2.4E-05 |
| TNFRSF14 | ENSG00000157873 | tumor necrosis factor receptor superfamily, member 14 [Source:HGNC Symbol;Acc:11912]          | -0.94 | 2.4E-05 |
| MOV10    | ENSG00000155363 | Mov10, Moloney leukemia virus 10, homolog (mouse) [Source:HGNC Symbol;Acc:7200]               | -0.72 | 2.4E-05 |
| KDM5C    | ENSG00000126012 | lysine (K)-specific demethylase 5C [Source:HGNC Symbol;Acc:11114]                             | -0.64 | 2.4E-05 |
| EVX1     | ENSG00000106038 | even-skipped homeobox 1 [Source:HGNC Symbol;Acc:3506]                                         | -0.87 | 2.4E-05 |
| IFITM10  | ENSG00000244242 | interferon induced transmembrane protein 10 [Source:HGNC Symbol;Acc:40022]                    | -1.62 | 2.4E-05 |
| SLC10A3  | ENSG00000126903 | solute carrier family 10, member 3 [Source:HGNC Symbol;Acc:22979]                             | -0.77 | 2.5E-05 |
| --       | ENSG00000259279 | --                                                                                            | -1.49 | 2.5E-05 |
| DDX60    | ENSG00000137628 | DEAD (Asp-Glu-Ala-Asp) box polypeptide 60 [Source:HGNC Symbol;Acc:25942]                      | -1.10 | 2.5E-05 |
| --       | ENSG00000228436 | --                                                                                            | -1.29 | 2.5E-05 |
| CCNL1    | ENSG00000163660 | cyclin L1 [Source:HGNC Symbol;Acc:20569]                                                      | -0.85 | 2.5E-05 |
| AKR1C1   | ENSG00000187134 | aldo-keto reductase family 1, member C1 [Source:HGNC Symbol;Acc:384]                          | -0.90 | 2.5E-05 |
| MACC1    | ENSG00000183742 | metastasis associated in colon cancer 1 [Source:HGNC Symbol;Acc:30215]                        | -0.88 | 2.5E-05 |
| MALT1    | ENSG00000172175 | mucosa associated lymphoid tissue lymphoma translocation gene 1 [Source:HGNC Symbol;Acc:6819] | -0.83 | 2.5E-05 |
| CAPN12   | ENSG00000182472 | calpain 12 [Source:HGNC Symbol;Acc:13249]                                                     | -0.86 | 2.6E-05 |
| ANKS1B   | ENSG00000185046 | ankyrin repeat and sterile alpha motif domain containing 1B [Source:HGNC Symbol;Acc:24600]    | -0.68 | 2.6E-05 |
| RALY     | ENSG00000125970 | RALY heterogeneous nuclear ribonucleoprotein [Source:HGNC Symbol;Acc:15921]                   | -0.77 | 2.6E-05 |

|         |                 |                                                                                                          |       |         |
|---------|-----------------|----------------------------------------------------------------------------------------------------------|-------|---------|
| ACTR1A  | ENSG00000138107 | ARP1 actin-related protein 1 homolog A, centractin alpha (yeast)<br>[Source:HGNC Symbol;Acc:167]         | -0.61 | 2.6E-05 |
| CMPK2   | ENSG00000134326 | cytidine monophosphate (UMP-CMP) kinase 2, mitochondrial<br>[Source:HGNC Symbol;Acc:27015]               | -1.21 | 2.6E-05 |
| ACOT8   | ENSG00000101473 | acyl-CoA thioesterase 8 [Source:HGNC Symbol;Acc:15919]                                                   | -0.81 | 2.6E-05 |
| CCDC88B | ENSG00000168071 | coiled-coil domain containing 88B [Source:HGNC Symbol;Acc:26757]                                         | -1.17 | 2.6E-05 |
| ISG15   | ENSG00000187608 | ISG15 ubiquitin-like modifier [Source:HGNC Symbol;Acc:4053]                                              | -1.27 | 2.6E-05 |
| RUSC2   | ENSG00000198853 | RUN and SH3 domain containing 2 [Source:HGNC Symbol;Acc:23625]                                           | -1.04 | 2.7E-05 |
| --      | ENSG00000265666 | --                                                                                                       | -1.62 | 2.7E-05 |
| RAI14   | ENSG00000039560 | retinoic acid induced 14 [Source:HGNC Symbol;Acc:14873]                                                  | -0.75 | 2.7E-05 |
| FCHSD1  | ENSG00000197948 | FCH and double SH3 domains 1 [Source:HGNC Symbol;Acc:25463]                                              | -0.80 | 2.7E-05 |
| FBXL18  | ENSG00000155034 | F-box and leucine-rich repeat protein 18 [Source:HGNC<br>Symbol;Acc:21874]                               | -1.18 | 2.7E-05 |
| INPP5A  | ENSG00000068383 | inositol polyphosphate-5-phosphatase, 40kDa [Source:HGNC<br>Symbol;Acc:6076]                             | -0.57 | 2.7E-05 |
| VAMP5   | ENSG00000168899 | vesicle-associated membrane protein 5 [Source:HGNC<br>Symbol;Acc:12646]                                  | -1.33 | 2.7E-05 |
| ZBTB22  | ENSG00000236104 | zinc finger and BTB domain containing 22 [Source:HGNC<br>Symbol;Acc:13085]                               | -0.87 | 2.8E-05 |
| MARCH2  | ENSG00000099785 | membrane-associated ring finger (C3HC4) 2, E3 ubiquitin protein<br>ligase [Source:HGNC Symbol;Acc:28038] | -1.00 | 2.8E-05 |
| DAP     | ENSG00000112977 | death-associated protein [Source:HGNC Symbol;Acc:2672]                                                   | -0.51 | 2.8E-05 |
| DDA1    | ENSG00000130311 | DET1 and DDB1 associated 1 [Source:HGNC Symbol;Acc:28360]                                                | -0.80 | 2.8E-05 |
| --      | ENSG00000260121 | --                                                                                                       | -0.85 | 2.8E-05 |
| SIRT6   | ENSG00000077463 | sirtuin 6 [Source:HGNC Symbol;Acc:14934]                                                                 | -1.20 | 2.8E-05 |
| DNTTIP1 | ENSG00000101457 | deoxynucleotidyltransferase, terminal, interacting protein 1<br>[Source:HGNC Symbol;Acc:16160]           | -0.69 | 2.9E-05 |
| PSMB10  | ENSG00000205220 | proteasome (prosome, macropain) subunit, beta type, 10<br>[Source:HGNC Symbol;Acc:9538]                  | -0.92 | 2.9E-05 |



|            |                 |                                                                                                                                                 |       |         |
|------------|-----------------|-------------------------------------------------------------------------------------------------------------------------------------------------|-------|---------|
| TNIP2      | ENSG00000168884 | TNFAIP3 interacting protein 2 [Source:HGNC Symbol;Acc:19118]<br>maestro heat-like repeat family member 1 [Source:HGNC<br>Symbol;Acc:26958]      | -0.89 | 2.9E-05 |
| MROH1      | ENSG00000179832 | lipin 3 [Source:HGNC Symbol;Acc:14451]                                                                                                          | -0.80 | 2.9E-05 |
| LPIN3      | ENSG00000132793 | absent in melanoma 2 [Source:HGNC Symbol;Acc:357]                                                                                               | -1.39 | 2.9E-05 |
| AIM2       | ENSG00000163568 | TBC1 domain family, member 23 [Source:HGNC Symbol;Acc:25622]<br>protein phosphatase 1, regulatory subunit 15B [Source:HGNC<br>Symbol;Acc:14951] | -0.82 | 3.0E-05 |
| TBC1D23    | ENSG00000036054 | actin related protein 2/3 complex, subunit 2, 34kDa [Source:HGNC<br>Symbol;Acc:705]                                                             | -0.72 | 3.0E-05 |
| PPP1R15B   | ENSG00000158615 | HNF1 homeobox B [Source:HGNC Symbol;Acc:11630]                                                                                                  | -0.84 | 3.1E-05 |
| ARPC2      | ENSG00000163466 | --                                                                                                                                              | -0.65 | 3.1E-05 |
| HNF1B      | ENSG00000108753 | --                                                                                                                                              | -0.88 | 3.1E-05 |
| --         | ENSG00000267458 | Wiskott-Aldrich syndrome-like [Source:HGNC Symbol;Acc:12735]                                                                                    | -0.89 | 3.1E-05 |
| WASL       | ENSG00000106299 | empty spiracles homeobox 1 [Source:HGNC Symbol;Acc:3340]                                                                                        | -1.65 | 3.1E-05 |
| EMX1       | ENSG00000135638 | transmembrane protein 184B [Source:HGNC Symbol;Acc:1310]                                                                                        | -0.63 | 3.1E-05 |
| TMEM184B   | ENSG00000198792 | --                                                                                                                                              | -1.08 | 3.1E-05 |
| --         | ENSG00000259515 | ubiquitin-conjugating enzyme E2F (putative) [Source:HGNC<br>Symbol;Acc:12480]                                                                   | -0.64 | 3.1E-05 |
| UBE2F      | ENSG00000184182 | carbonic anhydrase XIII [Source:HGNC Symbol;Acc:14914]                                                                                          | -0.80 | 3.2E-05 |
| CA13       | ENSG00000185015 | dual specificity phosphatase 8 [Source:HGNC Symbol;Acc:3074]                                                                                    | -1.13 | 3.2E-05 |
| DUSP8      | ENSG00000184545 | cyclin D3 [Source:HGNC Symbol;Acc:1585]                                                                                                         | -0.80 | 3.2E-05 |
| CCND3      | ENSG00000112576 | netrin 4 [Source:HGNC Symbol;Acc:13658]                                                                                                         | -0.99 | 3.2E-05 |
| NTN4       | ENSG00000074527 | hexokinase 1 [Source:HGNC Symbol;Acc:4922]                                                                                                      | -0.79 | 3.2E-05 |
| HK1        | ENSG00000156515 | solute carrier family 12 (potassium/chloride transporter), member 6<br>[Source:HGNC Symbol;Acc:10914]                                           | -0.95 | 3.2E-05 |
| SLC12A6    | ENSG00000140199 | transcription factor 7-like 2 (T-cell specific, HMG-box) [Source:HGNC<br>Symbol;Acc:11641]                                                      | -0.75 | 3.2E-05 |
| TCF7L2     | ENSG00000148737 | TMEM51 antisense RNA 1 [Source:HGNC Symbol;Acc:26301]                                                                                           | -0.89 | 3.3E-05 |
| TMEM51-AS: | ENSG00000175147 |                                                                                                                                                 |       |         |

|          |                 |                                                                                                                             |       |         |
|----------|-----------------|-----------------------------------------------------------------------------------------------------------------------------|-------|---------|
| PLOD2    | ENSG00000152952 | procollagen-lysine, 2-oxoglutarate 5-dioxygenase 2 [Source:HGNC Symbol;Acc:9082]                                            | -1.15 | 3.3E-05 |
| NPY4R    | ENSG00000204174 | neuropeptide Y receptor Y4 [Source:HGNC Symbol;Acc:9329]                                                                    | -1.72 | 3.3E-05 |
| PITX1    | ENSG00000069011 | paired-like homeodomain 1 [Source:HGNC Symbol;Acc:9004]                                                                     | -1.24 | 3.3E-05 |
| TRAPPC10 | ENSG00000160218 | trafficking protein particle complex 10 [Source:HGNC Symbol;Acc:11868]                                                      | -0.55 | 3.3E-05 |
| CSNK1D   | ENSG00000141551 | casein kinase 1, delta [Source:HGNC Symbol;Acc:2452]                                                                        | -0.87 | 3.4E-05 |
| --       | ENSG00000260006 | --                                                                                                                          | -1.13 | 3.4E-05 |
| SERPINE1 | ENSG00000106366 | serpin peptidase inhibitor, clade E (nexin, plasminogen activator inhibitor type 1), member 1 [Source:HGNC Symbol;Acc:8583] | -1.30 | 3.4E-05 |
| BET1L    | ENSG00000177951 | Bet1 golgi vesicular membrane trafficking protein-like [Source:HGNC Symbol;Acc:19348]                                       | -0.53 | 3.4E-05 |
| MAPK11   | ENSG00000185386 | mitogen-activated protein kinase 11 [Source:HGNC Symbol;Acc:6873]                                                           | -1.35 | 3.4E-05 |
| PPIC     | ENSG00000168938 | peptidylprolyl isomerase C (cyclophilin C) [Source:HGNC Symbol;Acc:9256]                                                    | -0.55 | 3.4E-05 |
| TAX1BP1  | ENSG00000106052 | Tax1 (human T-cell leukemia virus type I) binding protein 1 [Source:HGNC Symbol;Acc:11575]                                  | -0.82 | 3.5E-05 |
| SPATA1   | ENSG00000122432 | spermatogenesis associated 1 [Source:HGNC Symbol;Acc:14682]                                                                 | -0.90 | 3.5E-05 |
| WASH4P   | ENSG00000234769 | WAS protein family homolog 4 pseudogene [Source:HGNC Symbol;Acc:14126]                                                      | -0.83 | 3.5E-05 |
| HCG4P3   | ENSG00000237669 | HLA complex group 4 pseudogene 3 [Source:HGNC Symbol;Acc:22922]                                                             | -1.48 | 3.5E-05 |
| SLC4A9   | ENSG00000113073 | solute carrier family 4, sodium bicarbonate cotransporter, member 9 [Source:HGNC Symbol;Acc:11035]                          | -1.91 | 3.5E-05 |
| IHH      | ENSG00000163501 | indian hedgehog [Source:HGNC Symbol;Acc:5956]                                                                               | -0.84 | 3.5E-05 |
| LURAP1L  | ENSG00000153714 | leucine rich adaptor protein 1-like [Source:HGNC Symbol;Acc:31452]                                                          | -0.76 | 3.6E-05 |
| FAM83H   | ENSG00000180921 | family with sequence similarity 83, member H [Source:HGNC Symbol;Acc:24797]                                                 | -0.79 | 3.6E-05 |
| CTNBP1   | ENSG00000178585 | catenin, beta interacting protein 1 [Source:HGNC Symbol;Acc:16913]                                                          | -0.58 | 3.6E-05 |

|          |                 |                                                                                                  |       |         |
|----------|-----------------|--------------------------------------------------------------------------------------------------|-------|---------|
| AGRN     | ENSG00000188157 | agrin [Source:HGNC Symbol;Acc:329]                                                               | -1.00 | 3.6E-05 |
| ARNTL    | ENSG00000133794 | aryl hydrocarbon receptor nuclear translocator-like [Source:HGNC Symbol;Acc:701]                 | -1.07 | 3.7E-05 |
| STAM2    | ENSG00000115145 | signal transducing adaptor molecule (SH3 domain and ITAM motif) 2 [Source:HGNC Symbol;Acc:11358] | -0.87 | 3.7E-05 |
| --       | ENSG00000264769 | --                                                                                               | -1.39 | 3.7E-05 |
| MADD     | ENSG00000110514 | MAP-kinase activating death domain [Source:HGNC Symbol;Acc:6766]                                 | -0.65 | 3.7E-05 |
| TNK2     | ENSG00000061938 | tyrosine kinase, non-receptor, 2 [Source:HGNC Symbol;Acc:19297]                                  | -1.12 | 3.7E-05 |
| KIAA0513 | ENSG00000135709 | KIAA0513 [Source:HGNC Symbol;Acc:29058]                                                          | -1.13 | 3.7E-05 |
| PRKAB2   | ENSG00000131791 | protein kinase, AMP-activated, beta 2 non-catalytic subunit [Source:HGNC Symbol;Acc:9379]        | -0.99 | 3.7E-05 |
| HPGD     | ENSG00000164120 | hydroxyprostaglandin dehydrogenase 15-(NAD) [Source:HGNC Symbol;Acc:5154]                        | -1.04 | 3.7E-05 |
| ERVK13-1 | ENSG00000260565 | endogenous retrovirus group K13, member 1 [Source:HGNC Symbol;Acc:27548]                         | -0.76 | 3.7E-05 |
| --       | ENSG00000261490 | --                                                                                               | -1.05 | 3.8E-05 |
| PIEZO1   | ENSG00000103335 | piezo-type mechanosensitive ion channel component 1 [Source:HGNC Symbol;Acc:28993]               | -0.88 | 3.8E-05 |
| CD47     | ENSG00000196776 | CD47 molecule [Source:HGNC Symbol;Acc:1682]                                                      | -0.69 | 3.8E-05 |
| TAB3-AS2 | ENSG00000235512 | TAB3 antisense RNA 2 [Source:HGNC Symbol;Acc:40013]                                              | -1.46 | 3.8E-05 |
| MFSD5    | ENSG00000182544 | major facilitator superfamily domain containing 5 [Source:HGNC Symbol;Acc:28156]                 | -0.80 | 3.9E-05 |
| CCDC50   | ENSG00000152492 | coiled-coil domain containing 50 [Source:HGNC Symbol;Acc:18111]                                  | -0.77 | 3.9E-05 |
| TMEM220  | ENSG00000187824 | transmembrane protein 220 [Source:HGNC Symbol;Acc:33757]                                         | -1.78 | 3.9E-05 |
| ABTB1    | ENSG00000114626 | ankyrin repeat and BTB (POZ) domain containing 1 [Source:HGNC Symbol;Acc:18275]                  | -1.01 | 3.9E-05 |
| HCG4     | ENSG00000176998 | HLA complex group 4 (non-protein coding) [Source:HGNC Symbol;Acc:21241]                          | -0.93 | 3.9E-05 |

|           |                 |                                                                                                                           |       |         |
|-----------|-----------------|---------------------------------------------------------------------------------------------------------------------------|-------|---------|
| TMEM31    | ENSG00000179363 | transmembrane protein 31 [Source:HGNC Symbol;Acc:28601]                                                                   | -2.99 | 3.9E-05 |
| SPTLC2    | ENSG00000100596 | serine palmitoyltransferase, long chain base subunit 2 [Source:HGNC Symbol;Acc:11278]                                     | -0.57 | 3.9E-05 |
| LINC00672 | ENSG00000263874 | long intergenic non-protein coding RNA 672 [Source:HGNC Symbol;Acc:44353]                                                 | -1.73 | 3.9E-05 |
| CAMSAP3   | ENSG00000076826 | calmodulin regulated spectrin-associated protein family, member 3 [Source:HGNC Symbol;Acc:29307]                          | -0.95 | 4.0E-05 |
| DNAJC3    | ENSG00000102580 | DnaJ (Hsp40) homolog, subfamily C, member 3 [Source:HGNC Symbol;Acc:9439]                                                 | -0.76 | 4.0E-05 |
| UBE2Z     | ENSG00000159202 | ubiquitin-conjugating enzyme E2Z [Source:HGNC Symbol;Acc:25847]                                                           | -0.60 | 4.0E-05 |
| ZMYND15   | ENSG00000141497 | zinc finger, MYND-type containing 15 [Source:HGNC Symbol;Acc:20997]                                                       | -1.06 | 4.1E-05 |
| --        | ENSG00000249007 | --                                                                                                                        | -1.32 | 4.1E-05 |
| UBE2A     | ENSG00000077721 | ubiquitin-conjugating enzyme E2A [Source:HGNC Symbol;Acc:12472]                                                           | -0.67 | 4.1E-05 |
| CRLF3     | ENSG00000176390 | cytokine receptor-like factor 3 [Source:HGNC Symbol;Acc:17177]                                                            | -0.83 | 4.1E-05 |
| SLC7A11   | ENSG00000151012 | solute carrier family 7 (anionic amino acid transporter light chain, xc-system), member 11 [Source:HGNC Symbol;Acc:11059] | -1.00 | 4.1E-05 |
| AGPAT3    | ENSG00000160216 | 1-acylglycerol-3-phosphate O-acyltransferase 3 [Source:HGNC Symbol;Acc:326]                                               | -0.57 | 4.1E-05 |
| MAGT1     | ENSG00000102158 | magnesium transporter 1 [Source:HGNC Symbol;Acc:28880]                                                                    | -0.77 | 4.1E-05 |
| --        | ENSG00000227218 | --                                                                                                                        | -0.73 | 4.1E-05 |
| BIRC2     | ENSG00000110330 | baculoviral IAP repeat containing 2 [Source:HGNC Symbol;Acc:590]                                                          | -0.82 | 4.1E-05 |
| NGEF      | ENSG00000066248 | neuronal guanine nucleotide exchange factor [Source:HGNC Symbol;Acc:7807]                                                 | -0.71 | 4.2E-05 |
| PNKD      | ENSG00000127838 | paroxysmal nonkinesigenic dyskinesia [Source:HGNC Symbol;Acc:9153]                                                        | -0.79 | 4.2E-05 |
| FAM134C   | ENSG00000141699 | family with sequence similarity 134, member C [Source:HGNC Symbol;Acc:27258]                                              | -0.62 | 4.2E-05 |

|           |                 |                                                                                                                          |       |         |
|-----------|-----------------|--------------------------------------------------------------------------------------------------------------------------|-------|---------|
| MBD6      | ENSG00000166987 | methyl-CpG binding domain protein 6 [Source:HGNC Symbol;Acc:20445]                                                       | -0.81 | 4.2E-05 |
| ATL1      | ENSG00000198513 | atlastin GTPase 1 [Source:HGNC Symbol;Acc:11231]                                                                         | -1.22 | 4.2E-05 |
| PSCA      | ENSG00000167653 | prostate stem cell antigen [Source:HGNC Symbol;Acc:9500]                                                                 | -2.01 | 4.2E-05 |
| --        | ENSG00000249180 | --                                                                                                                       | -1.10 | 4.3E-05 |
| PDE4D     | ENSG00000113448 | phosphodiesterase 4D, cAMP-specific [Source:HGNC Symbol;Acc:8783]                                                        | -0.96 | 4.3E-05 |
| TNFRSF10D | ENSG00000173530 | tumor necrosis factor receptor superfamily, member 10d, decoy with truncated death domain [Source:HGNC Symbol;Acc:11907] | -0.58 | 4.3E-05 |
| SAMD4B    | ENSG00000179134 | sterile alpha motif domain containing 4B [Source:HGNC Symbol;Acc:25492]                                                  | -0.61 | 4.3E-05 |
| PRRX2     | ENSG00000167157 | paired related homeobox 2 [Source:HGNC Symbol;Acc:21338]                                                                 | -1.16 | 4.3E-05 |
| LLGL2     | ENSG00000073350 | lethal giant larvae homolog 2 (Drosophila) [Source:HGNC Symbol;Acc:6629]                                                 | -1.01 | 4.3E-05 |
| OSBPL11   | ENSG00000144909 | oxysterol binding protein-like 11 [Source:HGNC Symbol;Acc:16397]                                                         | -0.90 | 4.3E-05 |
| TMEM140   | ENSG00000146859 | transmembrane protein 140 [Source:HGNC Symbol;Acc:21870]                                                                 | -0.66 | 4.3E-05 |
| TANGO2    | ENSG00000183597 | transport and golgi organization 2 homolog (Drosophila) [Source:HGNC Symbol;Acc:25439]                                   | -0.84 | 4.3E-05 |
| RAB1A     | ENSG00000138069 | RAB1A, member RAS oncogene family [Source:HGNC Symbol;Acc:9758]                                                          | -0.66 | 4.3E-05 |
| --        | ENSG00000262413 | --                                                                                                                       | -1.28 | 4.4E-05 |
| --        | ENSG00000225854 | --                                                                                                                       | -2.56 | 4.5E-05 |
| IRF7      | ENSG00000185507 | interferon regulatory factor 7 [Source:HGNC Symbol;Acc:6122]                                                             | -1.17 | 4.5E-05 |
| ZNF83     | ENSG00000167766 | zinc finger protein 83 [Source:HGNC Symbol;Acc:13158]                                                                    | -0.91 | 4.5E-05 |
| ADCY6     | ENSG00000174233 | adenylate cyclase 6 [Source:HGNC Symbol;Acc:237]                                                                         | -0.74 | 4.6E-05 |
| --        | ENSG00000271643 | --                                                                                                                       | -1.11 | 4.6E-05 |
| NR1D1     | ENSG00000126368 | nuclear receptor subfamily 1, group D, member 1 [Source:HGNC Symbol;Acc:7962]                                            | -0.98 | 4.6E-05 |
| TMEM30B   | ENSG00000182107 | transmembrane protein 30B [Source:HGNC Symbol;Acc:27254]                                                                 | -0.77 | 4.6E-05 |

|            |                 |                                                                                   |       |         |
|------------|-----------------|-----------------------------------------------------------------------------------|-------|---------|
| --         | ENSG00000268307 | --                                                                                | -2.79 | 4.7E-05 |
| TMEM57     | ENSG00000204178 | transmembrane protein 57 [Source:HGNC Symbol;Acc:25572]                           | -0.67 | 4.7E-05 |
| EZR-AS1    | ENSG00000233893 | EZR antisense RNA 1 [Source:HGNC Symbol;Acc:40609]                                | -1.26 | 4.7E-05 |
| DHRS12     | ENSG00000102796 | dehydrogenase/reductase (SDR family) member 12 [Source:HGNC Symbol;Acc:25832]     | -0.75 | 4.7E-05 |
| SULF2      | ENSG00000196562 | sulfatase 2 [Source:HGNC Symbol;Acc:20392]                                        | -0.48 | 4.7E-05 |
| SESN2      | ENSG00000130766 | sestrin 2 [Source:HGNC Symbol;Acc:20746]                                          | -0.83 | 4.7E-05 |
| UBR4       | ENSG00000127481 | ubiquitin protein ligase E3 component n-recognin 4 [Source:HGNC Symbol;Acc:30313] | -0.63 | 4.7E-05 |
| GDF7       | ENSG00000143869 | growth differentiation factor 7 [Source:HGNC Symbol;Acc:4222]                     | -2.37 | 4.7E-05 |
| RASGEF1B   | ENSG00000138670 | RasGEF domain family, member 1B [Source:HGNC Symbol;Acc:24881]                    | -0.80 | 4.8E-05 |
| TBC1D2     | ENSG00000095383 | TBC1 domain family, member 2 [Source:HGNC Symbol;Acc:18026]                       | -0.73 | 4.8E-05 |
| --         | ENSG00000269495 | --                                                                                | -0.74 | 4.8E-05 |
| PRR14L     | ENSG00000183530 | proline rich 14-like [Source:HGNC Symbol;Acc:28738]                               | -0.64 | 4.8E-05 |
| ZNF784     | ENSG00000179922 | zinc finger protein 784 [Source:HGNC Symbol;Acc:33111]                            | -0.99 | 4.8E-05 |
| --         | ENSG00000269374 | --                                                                                | -1.46 | 4.9E-05 |
| KLC1       | ENSG00000126214 | kinesin light chain 1 [Source:HGNC Symbol;Acc:6387]                               | -0.97 | 4.9E-05 |
| ADAMTSL5   | ENSG00000185761 | ADAMTS-like 5 [Source:HGNC Symbol;Acc:27912]                                      | -0.97 | 4.9E-05 |
| KCTD21-AS1 | ENSG00000246174 | KCTD21 antisense RNA 1 [Source:HGNC Symbol;Acc:48674]                             | -0.97 | 4.9E-05 |
| RTN2       | ENSG00000125744 | reticulon 2 [Source:HGNC Symbol;Acc:10468]                                        | -0.96 | 4.9E-05 |
| NRAS       | ENSG00000213281 | neuroblastoma RAS viral (v-ras) oncogene homolog [Source:HGNC Symbol;Acc:7989]    | -0.91 | 4.9E-05 |
| TMSB4XP8   | ENSG00000187653 | thymosin beta 4, X-linked pseudogene 8 [Source:HGNC Symbol;Acc:11885]             | -1.10 | 5.0E-05 |
| GNG12-AS1  | ENSG00000232284 | GNG12 antisense RNA 1 [Source:HGNC Symbol;Acc:43938]                              | -1.07 | 5.0E-05 |
| FGD4       | ENSG00000139132 | FYVE, RhoGEF and PH domain containing 4 [Source:HGNC Symbol;Acc:19125]            | -0.90 | 5.0E-05 |
| --         | ENSG00000256152 | --                                                                                | -0.92 | 5.0E-05 |

|        |                 |                                                                                            |       |         |
|--------|-----------------|--------------------------------------------------------------------------------------------|-------|---------|
| ALDH2  | ENSG00000111275 | aldehyde dehydrogenase 2 family (mitochondrial) [Source:HGNC Symbol;Acc:404]               | -0.54 | 5.0E-05 |
| NAGA   | ENSG00000198951 | N-acetylgalactosaminidase, alpha- [Source:HGNC Symbol;Acc:7631]                            | -0.60 | 5.0E-05 |
| TMEM2  | ENSG00000135048 | transmembrane protein 2 [Source:HGNC Symbol;Acc:11869]                                     | -0.64 | 5.0E-05 |
| PER1   | ENSG00000179094 | period circadian clock 1 [Source:HGNC Symbol;Acc:8845]                                     | -1.10 | 5.1E-05 |
| LRRC19 | ENSG00000184434 | leucine rich repeat containing 19 [Source:HGNC Symbol;Acc:23379]                           | -0.89 | 5.1E-05 |
| --     | ENSG00000267265 | --                                                                                         | -1.18 | 5.2E-05 |
| VAMP2  | ENSG00000220205 | vesicle-associated membrane protein 2 (synaptobrevin 2) [Source:HGNC Symbol;Acc:12643]     | -0.75 | 5.2E-05 |
| --     | ENSG00000271975 | --                                                                                         | -0.88 | 5.2E-05 |
| CLDN3  | ENSG00000165215 | claudin 3 [Source:HGNC Symbol;Acc:2045]                                                    | -1.35 | 5.2E-05 |
| PDZD11 | ENSG00000120509 | PDZ domain containing 11 [Source:HGNC Symbol;Acc:28034]                                    | -0.61 | 5.3E-05 |
| ZNF624 | ENSG00000197566 | zinc finger protein 624 [Source:HGNC Symbol;Acc:29254]                                     | -1.32 | 5.3E-05 |
| --     | ENSG00000233799 | --                                                                                         | -1.29 | 5.4E-05 |
| COL7A1 | ENSG00000114270 | collagen, type VII, alpha 1 [Source:HGNC Symbol;Acc:2214]                                  | -1.17 | 5.4E-05 |
| CARD14 | ENSG00000141527 | caspase recruitment domain family, member 14 [Source:HGNC Symbol;Acc:16446]                | -1.06 | 5.4E-05 |
| GPR39  | ENSG00000183840 | G protein-coupled receptor 39 [Source:HGNC Symbol;Acc:4496]                                | -0.64 | 5.4E-05 |
| --     | ENSG00000223544 | --                                                                                         | -1.89 | 5.4E-05 |
| GRAMD4 | ENSG00000075240 | GRAM domain containing 4 [Source:HGNC Symbol;Acc:29113]                                    | -0.69 | 5.5E-05 |
| ANKS4B | ENSG00000175311 | ankyrin repeat and sterile alpha motif domain containing 4B [Source:HGNC Symbol;Acc:26795] | -0.75 | 5.5E-05 |
| FOXJ2  | ENSG00000065970 | forkhead box J2 [Source:HGNC Symbol;Acc:24818]                                             | -0.63 | 5.5E-05 |
| BRD2   | ENSG00000204256 | bromodomain containing 2 [Source:HGNC Symbol;Acc:1103]                                     | -0.52 | 5.6E-05 |
| NDP    | ENSG00000124479 | Norrie disease (pseudoglioma) [Source:HGNC Symbol;Acc:7678]                                | -1.22 | 5.6E-05 |
| NCOA1  | ENSG00000084676 | nuclear receptor coactivator 1 [Source:HGNC Symbol;Acc:7668]                               | -0.68 | 5.7E-05 |
| VPS33B | ENSG00000184056 | vacuolar protein sorting 33 homolog B (yeast) [Source:HGNC Symbol;Acc:12712]               | -0.62 | 5.7E-05 |

|           |                 |                                                                                                |       |         |
|-----------|-----------------|------------------------------------------------------------------------------------------------|-------|---------|
| HNRNPA1P1 | ENSG00000243188 | heterogeneous nuclear ribonucleoprotein A1 pseudogene 17 [Source:HGNC Symbol;Acc:39135]        | -2.71 | 5.8E-05 |
| EDF1      | ENSG00000107223 | endothelial differentiation-related factor 1 [Source:HGNC Symbol;Acc:3164]                     | -0.85 | 5.8E-05 |
| SHROOM3   | ENSG00000138771 | shroom family member 3 [Source:HGNC Symbol;Acc:30422]                                          | -0.64 | 5.8E-05 |
| PKP3      | ENSG00000184363 | plakophilin 3 [Source:HGNC Symbol;Acc:9025]                                                    | -0.97 | 5.9E-05 |
| MYOM3     | ENSG00000142661 | myomesin 3 [Source:HGNC Symbol;Acc:26679]                                                      | -0.69 | 5.9E-05 |
| CMIP      | ENSG00000153815 | c-Maf inducing protein [Source:HGNC Symbol;Acc:24319]                                          | -0.62 | 5.9E-05 |
| CDS1      | ENSG00000163624 | CDP-diacylglycerol synthase (phosphatidate cytidyltransferase) 1 [Source:HGNC Symbol;Acc:1800] | -0.67 | 5.9E-05 |
| LEMD1     | ENSG00000186007 | LEM domain containing 1 [Source:HGNC Symbol;Acc:18725]                                         | -1.70 | 5.9E-05 |
| STK3      | ENSG00000104375 | serine/threonine kinase 3 [Source:HGNC Symbol;Acc:11406]                                       | -0.88 | 5.9E-05 |
| RNF223    | ENSG00000237330 | ring finger protein 223 [Source:HGNC Symbol;Acc:40020]                                         | -1.15 | 6.0E-05 |
| ARNTL2    | ENSG00000029153 | aryl hydrocarbon receptor nuclear translocator-like 2 [Source:HGNC Symbol;Acc:18984]           | -0.92 | 6.0E-05 |
| RGS3      | ENSG00000138835 | regulator of G-protein signaling 3 [Source:HGNC Symbol;Acc:9999]                               | -0.67 | 6.0E-05 |
| MARK3     | ENSG00000075413 | MAP/microtubule affinity-regulating kinase 3 [Source:HGNC Symbol;Acc:6897]                     | -0.58 | 6.0E-05 |
| LPCAT4    | ENSG00000176454 | lysophosphatidylcholine acyltransferase 4 [Source:HGNC Symbol;Acc:30059]                       | -0.72 | 6.0E-05 |
| PHF1      | ENSG00000112511 | PHD finger protein 1 [Source:HGNC Symbol;Acc:8919]                                             | -0.90 | 6.0E-05 |
| SLC35F6   | ENSG00000213699 | solute carrier family 35, member F6 [Source:HGNC Symbol;Acc:26055]                             | -0.62 | 6.1E-05 |
| GLTSCR1   | ENSG00000063169 | glioma tumor suppressor candidate region gene 1 [Source:HGNC Symbol;Acc:4332]                  | -0.95 | 6.2E-05 |
| CRYL1     | ENSG00000165475 | crystallin, lambda 1 [Source:HGNC Symbol;Acc:18246]                                            | -0.69 | 6.2E-05 |
| KDM6B     | ENSG00000132510 | lysine (K)-specific demethylase 6B [Source:HGNC Symbol;Acc:29012]                              | -0.91 | 6.3E-05 |
| --        | ENSG00000224195 | --                                                                                             | -0.86 | 6.3E-05 |



|          |                 |                                                                                                                 |       |         |
|----------|-----------------|-----------------------------------------------------------------------------------------------------------------|-------|---------|
| VPS4B    | ENSG00000119541 | vacuolar protein sorting 4 homolog B ( <i>S. cerevisiae</i> ) [Source:HGNC Symbol;Acc:10895]                    | -0.93 | 6.3E-05 |
| LAT2     | ENSG00000086730 | linker for activation of T cells family, member 2 [Source:HGNC Symbol;Acc:12749]                                | -1.27 | 6.3E-05 |
| PFKFB4   | ENSG00000114268 | 6-phosphofructo-2-kinase/fructose-2,6-biphosphatase 4 [Source:HGNC Symbol;Acc:8875]                             | -0.87 | 6.3E-05 |
| ARL2BP   | ENSG00000102931 | ADP-ribosylation factor-like 2 binding protein [Source:HGNC Symbol;Acc:17146]                                   | -0.64 | 6.4E-05 |
| AGO2     | ENSG00000123908 | argonaute RISC catalytic component 2 [Source:HGNC Symbol;Acc:3263]                                              | -0.63 | 6.4E-05 |
| RNF112   | ENSG00000128482 | ring finger protein 112 [Source:HGNC Symbol;Acc:12968]                                                          | -1.86 | 6.4E-05 |
| AFF4     | ENSG00000072364 | AF4/FMR2 family, member 4 [Source:HGNC Symbol;Acc:17869]                                                        | -0.80 | 6.5E-05 |
| NR1H2    | ENSG00000131408 | nuclear receptor subfamily 1, group H, member 2 [Source:HGNC Symbol;Acc:7965]                                   | -0.96 | 6.5E-05 |
| TAF10    | ENSG00000166337 | TAF10 RNA polymerase II, TATA box binding protein (TBP)-associated factor, 30kDa [Source:HGNC Symbol;Acc:11543] | -0.68 | 6.5E-05 |
| FEM1C    | ENSG00000145780 | fem-1 homolog c ( <i>C. elegans</i> ) [Source:HGNC Symbol;Acc:16933]                                            | -0.82 | 6.5E-05 |
| ZNF217   | ENSG00000171940 | zinc finger protein 217 [Source:HGNC Symbol;Acc:13009]                                                          | -0.78 | 6.5E-05 |
| CEBPB    | ENSG00000172216 | CCAAT/enhancer binding protein (C/EBP), beta [Source:HGNC Symbol;Acc:1834]                                      | -0.84 | 6.5E-05 |
| EXOC3    | ENSG00000180104 | exocyst complex component 3 [Source:HGNC Symbol;Acc:30378]                                                      | -0.83 | 6.6E-05 |
| ELL      | ENSG00000105656 | elongation factor RNA polymerase II [Source:HGNC Symbol;Acc:23114]                                              | -1.10 | 6.6E-05 |
| CTGF     | ENSG00000118523 | connective tissue growth factor [Source:HGNC Symbol;Acc:2500]                                                   | -0.99 | 6.7E-05 |
| MGAT5    | ENSG00000152127 | mannosyl (alpha-1,6-)-glycoprotein beta-1,6-N-acetylglucosaminyltransferase [Source:HGNC Symbol;Acc:7049]       | -0.64 | 6.7E-05 |
| PGPEP1   | ENSG00000130517 | pyroglutamyl-peptidase I [Source:HGNC Symbol;Acc:13568]                                                         | -0.56 | 6.7E-05 |
| C11orf35 | ENSG00000185522 | chromosome 11 open reading frame 35 [Source:HGNC Symbol;Acc:28561]                                              | -1.16 | 6.7E-05 |

|          |                 |                                                                                          |       |         |
|----------|-----------------|------------------------------------------------------------------------------------------|-------|---------|
| TMED4    | ENSG00000158604 | transmembrane emp24 protein transport domain containing 4 [Source:HGNC Symbol;Acc:22301] | -0.44 | 6.7E-05 |
| INSC     | ENSG00000188487 | inscuteable homolog (Drosophila) [Source:HGNC Symbol;Acc:33116]                          | -1.18 | 6.7E-05 |
| TESK1    | ENSG00000107140 | testis-specific kinase 1 [Source:HGNC Symbol;Acc:11731]                                  | -0.90 | 6.7E-05 |
| C19orf77 | ENSG00000095932 | chromosome 19 open reading frame 77 [Source:HGNC Symbol;Acc:37244]                       | -0.74 | 6.8E-05 |
| CIDECP   | ENSG00000186162 | cell death-inducing DFFA-like effector c pseudogene [Source:HGNC Symbol;Acc:24230]       | -0.85 | 6.8E-05 |
| C5orf56  | ENSG00000197536 | chromosome 5 open reading frame 56 [Source:HGNC Symbol;Acc:33838]                        | -0.86 | 6.8E-05 |
| --       | ENSG00000259230 | --                                                                                       | -1.22 | 6.8E-05 |
| PCBP1    | ENSG00000169564 | poly(rC) binding protein 1 [Source:HGNC Symbol;Acc:8647]                                 | -0.50 | 6.9E-05 |
| --       | ENSG00000273038 | --                                                                                       | -1.07 | 6.9E-05 |
| C17orf85 | ENSG00000074356 | chromosome 17 open reading frame 85 [Source:HGNC Symbol;Acc:24612]                       | -0.57 | 6.9E-05 |
| PIWIL4   | ENSG00000134627 | piwi-like RNA-mediated gene silencing 4 [Source:HGNC Symbol;Acc:18444]                   | -0.74 | 6.9E-05 |
| MGEA5    | ENSG00000198408 | meningioma expressed antigen 5 (hyaluronidase) [Source:HGNC Symbol;Acc:7056]             | -0.56 | 7.0E-05 |
| ATG14    | ENSG00000126775 | autophagy related 14 [Source:HGNC Symbol;Acc:19962]                                      | -0.75 | 7.0E-05 |
| ALCAM    | ENSG00000170017 | activated leukocyte cell adhesion molecule [Source:HGNC Symbol;Acc:400]                  | -0.91 | 7.0E-05 |
| RBCK1    | ENSG00000125826 | RanBP-type and C3HC4-type zinc finger containing 1 [Source:HGNC Symbol;Acc:15864]        | -0.88 | 7.0E-05 |
| SPRY4    | ENSG00000187678 | sprouty homolog 4 (Drosophila) [Source:HGNC Symbol;Acc:15533]                            | -0.54 | 7.1E-05 |
| GOLGA5   | ENSG00000066455 | golgin A5 [Source:HGNC Symbol;Acc:4428]                                                  | -0.73 | 7.2E-05 |
| UBR2     | ENSG00000024048 | ubiquitin protein ligase E3 component n-recognin 2 [Source:HGNC Symbol;Acc:21289]        | -0.64 | 7.2E-05 |
| --       | ENSG00000267688 | --                                                                                       | -1.04 | 7.2E-05 |

|          |                 |                                                                                                                |       |         |
|----------|-----------------|----------------------------------------------------------------------------------------------------------------|-------|---------|
| APOBR    | ENSG00000184730 | apolipoprotein B receptor [Source:HGNC Symbol;Acc:24087]                                                       | -0.97 | 7.2E-05 |
| --       | ENSG00000272078 | --                                                                                                             | -1.05 | 7.4E-05 |
| RTFDC1   | ENSG00000022277 | replication termination factor 2 domain containing 1 [Source:HGNC Symbol;Acc:15890]                            | -0.48 | 7.4E-05 |
| UBXN6    | ENSG00000167671 | UBX domain protein 6 [Source:HGNC Symbol;Acc:14928]                                                            | -0.93 | 7.4E-05 |
| MBP      | ENSG00000197971 | myelin basic protein [Source:HGNC Symbol;Acc:6925]                                                             | -0.64 | 7.4E-05 |
| C10orf99 | ENSG00000188373 | chromosome 10 open reading frame 99 [Source:HGNC Symbol;Acc:31428]                                             | -0.95 | 7.4E-05 |
| --       | ENSG00000242628 | --                                                                                                             | -1.21 | 7.5E-05 |
| ALDOC    | ENSG00000109107 | aldolase C, fructose-bisphosphate [Source:HGNC Symbol;Acc:418]                                                 | -0.79 | 7.5E-05 |
| ANXA8    | ENSG00000165390 | annexin A8 [Source:HGNC Symbol;Acc:546]                                                                        | -1.86 | 7.5E-05 |
| USP54    | ENSG00000166348 | ubiquitin specific peptidase 54 [Source:HGNC Symbol;Acc:23513]                                                 | -0.54 | 7.5E-05 |
| --       | ENSG00000228843 | --                                                                                                             | -0.78 | 7.6E-05 |
| SLMAP    | ENSG00000163681 | sarcolemma associated protein [Source:HGNC Symbol;Acc:16643]                                                   | -0.86 | 7.7E-05 |
| KRT18    | ENSG00000111057 | keratin 18 [Source:HGNC Symbol;Acc:6430]                                                                       | -0.77 | 7.7E-05 |
| DLST     | ENSG00000119689 | dihydrolipoamide S-succinyltransferase (E2 component of 2-oxo-glutarate complex) [Source:HGNC Symbol;Acc:2911] | -0.57 | 7.7E-05 |
| VPS37C   | ENSG00000167987 | vacuolar protein sorting 37 homolog C (S. cerevisiae) [Source:HGNC Symbol;Acc:26097]                           | -0.72 | 7.7E-05 |
| MGRN1    | ENSG00000102858 | mahogunin ring finger 1, E3 ubiquitin protein ligase [Source:HGNC Symbol;Acc:20254]                            | -0.79 | 7.8E-05 |
| TPRN     | ENSG00000176058 | taperin [Source:HGNC Symbol;Acc:26894]                                                                         | -0.90 | 7.8E-05 |
| INO80D   | ENSG00000114933 | INO80 complex subunit D [Source:HGNC Symbol;Acc:25997]                                                         | -0.75 | 7.8E-05 |
| SRGAP1   | ENSG00000196935 | SLIT-ROBO Rho GTPase activating protein 1 [Source:HGNC Symbol;Acc:17382]                                       | -0.71 | 7.8E-05 |
| ZFAND6   | ENSG00000086666 | zinc finger, AN1-type domain 6 [Source:HGNC Symbol;Acc:30164]                                                  | -0.69 | 7.8E-05 |
| DNMBP    | ENSG00000107554 | dynamamin binding protein [Source:HGNC Symbol;Acc:30373]                                                       | -0.50 | 7.8E-05 |
| STARD4   | ENSG00000164211 | StAR-related lipid transfer (START) domain containing 4 [Source:HGNC Symbol;Acc:18058]                         | -0.90 | 7.9E-05 |

|            |                 |                                                                                        |       |         |
|------------|-----------------|----------------------------------------------------------------------------------------|-------|---------|
| BCAR1      | ENSG00000050820 | breast cancer anti-estrogen resistance 1 [Source:HGNC Symbol;Acc:971]                  | -1.11 | 7.9E-05 |
| DENND1A    | ENSG00000119522 | DENN/MADD domain containing 1A [Source:HGNC Symbol;Acc:29324]                          | -0.62 | 7.9E-05 |
| SHROOM1    | ENSG00000164403 | shroom family member 1 [Source:HGNC Symbol;Acc:24084]                                  | -0.97 | 8.0E-05 |
| RBM23      | ENSG00000100461 | RNA binding motif protein 23 [Source:HGNC Symbol;Acc:20155]                            | -0.51 | 8.0E-05 |
| MIR194-2   | ENSG00000229719 | microRNA 194-2 [Source:HGNC Symbol;Acc:31565]                                          | -1.33 | 8.0E-05 |
| --         | ENSG00000267709 | --                                                                                     | -1.02 | 8.0E-05 |
| ITGB1BP1   | ENSG00000119185 | integrin beta 1 binding protein 1 [Source:HGNC Symbol;Acc:23927]                       | -0.66 | 8.0E-05 |
| TUBA4A     | ENSG00000127824 | tubulin, alpha 4a [Source:HGNC Symbol;Acc:12407]                                       | -0.71 | 8.0E-05 |
| TPM3       | ENSG00000143549 | tropomyosin 3 [Source:HGNC Symbol;Acc:12012]                                           | -0.57 | 8.1E-05 |
| CANT1      | ENSG00000171302 | calcium activated nucleotidase 1 [Source:HGNC Symbol;Acc:19721]                        | -0.70 | 8.1E-05 |
| REN        | ENSG00000143839 | renin [Source:HGNC Symbol;Acc:9958]                                                    | -1.43 | 8.1E-05 |
| RILP       | ENSG00000167705 | Rab interacting lysosomal protein [Source:HGNC Symbol;Acc:30266]                       | -0.98 | 8.2E-05 |
| JHDM1D-AS1 | ENSG00000260231 | JHDM1D antisense RNA 1 (head to head) [Source:HGNC Symbol;Acc:48959]                   | -0.73 | 8.2E-05 |
| ARRDC1     | ENSG00000197070 | arrestin domain containing 1 [Source:HGNC Symbol;Acc:28633]                            | -1.04 | 8.2E-05 |
| MMAA       | ENSG00000151611 | methylmalonic aciduria (cobalamin deficiency) cblA type [Source:HGNC Symbol;Acc:18871] | -0.79 | 8.3E-05 |
| EPHB1      | ENSG00000154928 | EPH receptor B1 [Source:HGNC Symbol;Acc:3392]                                          | -0.72 | 8.3E-05 |
| FAM151A    | ENSG00000162391 | family with sequence similarity 151, member A [Source:HGNC Symbol;Acc:25032]           | -1.01 | 8.4E-05 |
| EGLN1      | ENSG00000135766 | egl-9 family hypoxia-inducible factor 1 [Source:HGNC Symbol;Acc:1232]                  | -0.79 | 8.4E-05 |
| IFNE       | ENSG00000184995 | interferon, epsilon [Source:HGNC Symbol;Acc:18163]                                     | -1.25 | 8.4E-05 |
| MAPK8IP2   | ENSG00000008735 | mitogen-activated protein kinase 8 interacting protein 2 [Source:HGNC Symbol;Acc:6883] | -1.36 | 8.4E-05 |
| RNF11      | ENSG00000123091 | ring finger protein 11 [Source:HGNC Symbol;Acc:10056]                                  | -0.80 | 8.5E-05 |
| TSPAN2     | ENSG00000134198 | tetraspanin 2 [Source:HGNC Symbol;Acc:20659]                                           | -1.33 | 8.6E-05 |

|          |                 |                                                                                                                            |       |         |
|----------|-----------------|----------------------------------------------------------------------------------------------------------------------------|-------|---------|
| RCOR1    | ENSG00000089902 | REST corepressor 1 [Source:HGNC Symbol;Acc:17441]<br>luteinizing hormone beta polypeptide [Source:HGNC<br>Symbol;Acc:6584] | -0.72 | 8.6E-05 |
| LHB      | ENSG00000104826 | akirin 2 [Source:HGNC Symbol;Acc:21407]                                                                                    | -2.18 | 8.6E-05 |
| AKIRIN2  | ENSG00000135334 | sushi domain containing 1 [Source:HGNC Symbol;Acc:25413]                                                                   | -0.56 | 8.7E-05 |
| SUSD1    | ENSG00000106868 | zinc finger protein 655 [Source:HGNC Symbol;Acc:30899]                                                                     | -0.78 | 8.8E-05 |
| ZNF655   | ENSG00000197343 | Snf2-related CREBBP activator protein [Source:HGNC<br>Symbol;Acc:16974]                                                    | -0.55 | 8.9E-05 |
| SRCAP    | ENSG00000080603 | hematopoietic SH2 domain containing [Source:HGNC<br>Symbol;Acc:24920]                                                      | -0.78 | 9.0E-05 |
| HSH2D    | ENSG00000196684 | retinitis pigmentosa 2 (X-linked recessive) [Source:HGNC<br>Symbol;Acc:10274]                                              | -0.87 | 9.0E-05 |
| RP2      | ENSG00000102218 | solute carrier family 35, member E1 [Source:HGNC<br>Symbol;Acc:20803]                                                      | -0.86 | 9.0E-05 |
| SLC35E1  | ENSG00000127526 | SMAD specific E3 ubiquitin protein ligase 2 [Source:HGNC<br>Symbol;Acc:16809]                                              | -0.59 | 9.0E-05 |
| SMURF2   | ENSG00000108854 | solute carrier family 2 (facilitated glucose transporter), member 13<br>[Source:HGNC Symbol;Acc:15956]                     | -0.72 | 9.0E-05 |
| SLC2A13  | ENSG00000151229 | tectonin beta-propeller repeat containing 1 [Source:HGNC<br>Symbol;Acc:22214]                                              | -1.09 | 9.0E-05 |
| TECPR1   | ENSG00000205356 | DIP2 disco-interacting protein 2 homolog A (Drosophila)<br>[Source:HGNC Symbol;Acc:17217]                                  | -0.97 | 9.2E-05 |
| DIP2A    | ENSG00000160305 | follistatin-like 3 (secreted glycoprotein) [Source:HGNC<br>Symbol;Acc:3973]                                                | -0.64 | 9.3E-05 |
| FSTL3    | ENSG00000070404 | chromosome 13 open reading frame 45 [Source:HGNC<br>Symbol;Acc:44370]                                                      | -1.08 | 9.3E-05 |
| C13orf45 | ENSG00000178734 | HID1 domain containing [Source:HGNC Symbol;Acc:15736]                                                                      | -1.82 | 9.4E-05 |
| HID1     | ENSG00000167861 | inositol-tetrakisphosphate 1-kinase [Source:HGNC Symbol;Acc:6177]                                                          | -0.87 | 9.5E-05 |
| ITPK1    | ENSG00000100605 | Kruppel-like factor 10 [Source:HGNC Symbol;Acc:11810]                                                                      | -0.65 | 9.5E-05 |
| KLF10    | ENSG00000155090 |                                                                                                                            | -0.91 | 9.5E-05 |

|           |                 |                                                                                                     |       |         |
|-----------|-----------------|-----------------------------------------------------------------------------------------------------|-------|---------|
| GPCPD1    | ENSG00000125772 | glycerophosphocholine phosphodiesterase GDE1 homolog (S. cerevisiae) [Source:HGNC Symbol;Acc:26957] | -0.80 | 9.5E-05 |
| ENTPD4    | ENSG00000197217 | ectonucleoside triphosphate diphosphohydrolase 4 [Source:HGNC Symbol;Acc:14573]                     | -0.64 | 9.5E-05 |
| RPL13AP20 | ENSG00000234498 | ribosomal protein L13a pseudogene 20 [Source:HGNC Symbol;Acc:35709]                                 | -1.07 | 9.6E-05 |
| TMPRSS3   | ENSG00000160183 | transmembrane protease, serine 3 [Source:HGNC Symbol;Acc:11877]                                     | -0.83 | 9.6E-05 |
| SH2D3C    | ENSG00000095370 | SH2 domain containing 3C [Source:HGNC Symbol;Acc:16884]                                             | -1.81 | 9.7E-05 |
| NDUFA4L2  | ENSG00000185633 | NADH dehydrogenase (ubiquinone) 1 alpha subcomplex, 4-like 2 [Source:HGNC Symbol;Acc:29836]         | -1.24 | 9.8E-05 |
| NBL1      | ENSG00000158747 | neuroblastoma 1, DAN family BMP antagonist [Source:HGNC Symbol;Acc:7650]                            | -0.97 | 9.8E-05 |
| NCOA4     | ENSG00000138293 | nuclear receptor coactivator 4 [Source:HGNC Symbol;Acc:7671]                                        | -0.71 | 9.9E-05 |
| SVIL      | ENSG00000197321 | supervillin [Source:HGNC Symbol;Acc:11480]                                                          | -0.70 | 9.9E-05 |
| UBA7      | ENSG00000182179 | ubiquitin-like modifier activating enzyme 7 [Source:HGNC Symbol;Acc:12471]                          | -0.57 | 9.9E-05 |
| SNRPGP15  | ENSG00000224543 | small nuclear ribonucleoprotein polypeptide G pseudogene 15 [Source:HGNC Symbol;Acc:49371]          | -1.87 | 9.9E-05 |
| RHOB      | ENSG00000143878 | ras homolog family member B [Source:HGNC Symbol;Acc:668]                                            | -0.79 | 9.9E-05 |
| RER1      | ENSG00000157916 | retention in endoplasmic reticulum sorting receptor 1 [Source:HGNC Symbol;Acc:30309]                | -0.53 | 1.0E-04 |
