# Supplementary material
Source: PubMed Central journal article supplement (PMC4855076)
Supplement: onc2015280x3.pdf [file onc2015280x3.pdf]

**Supplementary Table 2.** Enrichment for Gene Ontology (GO) terms in genes up- and down-regulated after 3 days of ETC-159 treatment. For each GO category (biological process, cellular component and molecular function) we report the significant GO terms (adjusted P-value <5%). Enrichments were calculated by Webgestalt (WEB-based GENE SeT AnaLysis Toolkit, (Zhang, B., Kirov, S.A., Snoddy, J.R. (2005). WebGestalt: an integrated system for exploring gene sets in various biological contexts. *Nucleic Acids Res*, 33(Web Server issue), W741-748)) and using the set of tumor expressed genes as the background (see Methods). For each significant GO term we report: the number of reference genes in the category (C), the number of genes in the gene set and also in the category (O), the expected number in the category (E), the ratio of enrichment (R), and P-value of significance of the enrichment adjusted by the multiple tests

| Enrichment for GO terms in genes up-regulated after 3 days of ETC-159 treatment |                           |                           |                     |                         |                  |                                                           |            |
|---------------------------------------------------------------------------------|---------------------------|---------------------------|---------------------|-------------------------|------------------|-----------------------------------------------------------|------------|
| GO category                                                                     | Genes in the category (C) | Genes in the gene set (O) | Expected number (E) | Ratio of enrichment (R) | Adjusted P-value | GO term name                                              | GO term    |
| biological process                                                              | 919                       | 30                        | 11.43               | 2.62                    | 7.00E-04         | response to wounding                                      | GO:0009611 |
| biological process                                                              | 4499                      | 85                        | 55.98               | 1.52                    | 7.00E-04         | single-multicellular organism process                     | GO:0044707 |
| biological process                                                              | 4518                      | 85                        | 56.22               | 1.51                    | 7.00E-04         | multicellular organismal process                          | GO:0032501 |
| biological process                                                              | 1109                      | 32                        | 13.8                | 2.32                    | 1.80E-03         | response to external stimulus                             | GO:0009605 |
| biological process                                                              | 13                        | 4                         | 0.16                | 24.73                   | 4.20E-03         | heat generation                                           | GO:0031649 |
| biological process                                                              | 1469                      | 37                        | 18.28               | 2.02                    | 4.20E-03         | regulation of multicellular organismal process            | GO:0051239 |
| biological process                                                              | 156                       | 10                        | 1.94                | 5.15                    | 4.40E-03         | regulation of inflammatory response                       | GO:0050727 |
| biological process                                                              | 387                       | 16                        | 4.82                | 3.32                    | 4.40E-03         | inflammatory response                                     | GO:0006954 |
| biological process                                                              | 306                       | 14                        | 3.81                | 3.68                    | 4.40E-03         | regulation of response to external stimulus               | GO:0032101 |
| biological process                                                              | 170                       | 10                        | 2.12                | 4.73                    | 7.40E-03         | positive regulation of cytokine production                | GO:0001819 |
| biological process                                                              | 174                       | 10                        | 2.17                | 4.62                    | 8.00E-03         | regulation of immune effector process                     | GO:0002697 |
| biological process                                                              | 86                        | 7                         | 1.07                | 6.54                    | 8.00E-03         | acute inflammatory response                               | GO:0002526 |
| biological process                                                              | 223                       | 11                        | 2.77                | 3.96                    | 8.00E-03         | negative regulation of phosphate metabolic process        | GO:0045936 |
| biological process                                                              | 223                       | 11                        | 2.77                | 3.96                    | 8.00E-03         | negative regulation of phosphorus metabolic process       | GO:0010563 |
| biological process                                                              | 269                       | 12                        | 3.35                | 3.59                    | 8.00E-03         | anion transport                                           | GO:0006820 |
| biological process                                                              | 355                       | 14                        | 4.42                | 3.17                    | 8.00E-03         | cytokine production                                       | GO:0001816 |
| biological process                                                              | 39                        | 5                         | 0.49                | 10.3                    | 8.00E-03         | regulation of acute inflammatory response                 | GO:0002673 |
| biological process                                                              | 401                       | 15                        | 4.99                | 3.01                    | 8.00E-03         | positive regulation of multicellular organismal process   | GO:0051240 |
| biological process                                                              | 10                        | 3                         | 0.12                | 24.11                   | 1.03E-02         | positive regulation of steroid biosynthetic process       | GO:0010893 |
| biological process                                                              | 195                       | 10                        | 2.43                | 4.12                    | 1.03E-02         | negative regulation of phosphorylation                    | GO:0042326 |
| biological process                                                              | 2                         | 2                         | 0.02                | 80.37                   | 1.03E-02         | positive regulation of calcidiol 1-monooxygenase activity | GO:0060559 |
| biological process                                                              | 237                       | 11                        | 2.95                | 3.73                    | 1.03E-02         | gland development                                         | GO:0048732 |
| biological process                                                              | 24                        | 4                         | 0.3                 | 13.39                   | 1.03E-02         | regulation of humoral immune response                     | GO:0002920 |
| biological process                                                              | 244                       | 11                        | 3.04                | 3.62                    | 1.03E-02         | steroid metabolic process                                 | GO:0008202 |
| biological process                                                              | 2916                      | 56                        | 36.28               | 1.54                    | 1.03E-02         | system development                                        | GO:0048731 |
| biological process                                                              | 317                       | 13                        | 3.94                | 3.3                     | 1.03E-02         | regulation of cytokine production                         | GO:0001817 |
| biological process                                                              | 832                       | 23                        | 10.35               | 2.22                    | 1.03E-02         | defense response                                          | GO:0006952 |
| biological process                                                              | 9                         | 3                         | 0.11                | 26.79                   | 1.03E-02         | fever generation                                          | GO:0001660 |

|                    |      |     |       |       |          |                                                                  |            |
|--------------------|------|-----|-------|-------|----------|------------------------------------------------------------------|------------|
| biological process | 101  | 7   | 1.26  | 5.57  | 1.27E-02 | protein processing                                               | GO:0016485 |
| biological process | 11   | 3   | 0.14  | 21.92 | 1.27E-02 | hemidesmosome assembly                                           | GO:0031581 |
| biological process | 26   | 4   | 0.32  | 12.36 | 1.27E-02 | positive regulation of reactive oxygen species metabolic process | GO:2000379 |
| biological process | 26   | 4   | 0.32  | 12.36 | 1.27E-02 | temperature homeostasis                                          | GO:0001659 |
| biological process | 481  | 16  | 5.98  | 2.67  | 1.27E-02 | response to biotic stimulus                                      | GO:0009607 |
| biological process | 6247 | 99  | 77.73 | 1.27  | 1.27E-02 | single-organism process                                          | GO:0044699 |
| biological process | 1040 | 26  | 12.94 | 2.01  | 1.52E-02 | locomotion                                                       | GO:0040011 |
| biological process | 258  | 11  | 3.21  | 3.43  | 1.52E-02 | epithelial cell differentiation                                  | GO:0030855 |
| biological process | 3770 | 67  | 46.91 | 1.43  | 1.52E-02 | developmental process                                            | GO:0032502 |
| biological process | 51   | 5   | 0.63  | 7.88  | 1.52E-02 | regulation of reactive oxygen species metabolic process          | GO:2000377 |
| biological process | 113  | 7   | 1.41  | 4.98  | 1.60E-02 | protein maturation                                               | GO:0051604 |
| biological process | 13   | 3   | 0.16  | 18.55 | 1.60E-02 | regulation of hair cycle                                         | GO:0042634 |
| cellular component | 1456 | 53  | 18.6  | 2.85  | 9.99E-11 | extracellular region                                             | GO:0005576 |
| cellular component | 3180 | 73  | 40.63 | 1.8   | 2.75E-06 | cell periphery                                                   | GO:0071944 |
| cellular component | 3102 | 69  | 39.63 | 1.74  | 1.82E-05 | plasma membrane                                                  | GO:0005886 |
| cellular component | 816  | 29  | 10.42 | 2.78  | 1.82E-05 | extracellular region part                                        | GO:0044421 |
| cellular component | 101  | 10  | 1.29  | 7.75  | 1.94E-05 | anchored to membrane                                             | GO:0031225 |
| cellular component | 3920 | 78  | 50.08 | 1.56  | 0.0001   | intrinsic to membrane                                            | GO:0031224 |
| cellular component | 633  | 23  | 8.09  | 2.84  | 0.0001   | extracellular space                                              | GO:0005615 |
| cellular component | 198  | 12  | 2.53  | 4.74  | 0.0002   | apical plasma membrane                                           | GO:0016324 |
| cellular component | 3837 | 74  | 49.02 | 1.51  | 0.0005   | integral to membrane                                             | GO:0016021 |
| cellular component | 4577 | 84  | 58.47 | 1.44  | 0.0006   | membrane part                                                    | GO:0044425 |
| cellular component | 6063 | 103 | 77.46 | 1.33  | 0.0009   | membrane                                                         | GO:0016020 |
| cellular component | 260  | 12  | 3.32  | 3.61  | 0.0013   | apical part of cell                                              | GO:0045177 |
| cellular component | 1492 | 35  | 19.06 | 1.84  | 0.0036   | plasma membrane part                                             | GO:0044459 |
| cellular component | 921  | 24  | 11.77 | 2.04  | 0.0077   | intrinsic to plasma membrane                                     | GO:0031226 |
| cellular component | 887  | 23  | 11.33 | 2.03  | 0.0092   | integral to plasma membrane                                      | GO:0005887 |
| cellular component | 18   | 3   | 0.23  | 13.05 | 0.0144   | basal lamina                                                     | GO:0005605 |
| cellular component | 612  | 17  | 7.82  | 2.17  | 0.0199   | cell junction                                                    | GO:0030054 |
| cellular component | 268  | 10  | 3.42  | 2.92  | 0.0205   | proteinaceous extracellular matrix                               | GO:0005578 |
| cellular component | 376  | 12  | 4.8   | 2.5   | 0.0254   | cell surface                                                     | GO:0009986 |
| cellular component | 7    | 2   | 0.09  | 22.36 | 0.0254   | hemidesmosome                                                    | GO:0030056 |
| cellular component | 10   | 2   | 0.13  | 15.65 | 0.0499   | laminin complex                                                  | GO:0043256 |
| molecular function | 139  | 9   | 1.71  | 5.28  | 0.0119   | cytokine activity                                                | GO:0005125 |
| molecular function | 3    | 2   | 0.04  | 54.32 | 0.0301   | cyclase activator activity                                       | GO:0010853 |

|                    |     |    |       |       |        |                                                      |            |
|--------------------|-----|----|-------|-------|--------|------------------------------------------------------|------------|
| molecular function | 3   | 2  | 0.04  | 54.32 | 0.0301 | guanylate cyclase activator activity                 | GO:0030250 |
| molecular function | 952 | 24 | 11.68 | 2.05  | 0.0339 | receptor binding                                     | GO:0005102 |
| molecular function | 4   | 2  | 0.05  | 40.74 | 0.0339 | cyclase regulator activity                           | GO:0010851 |
| molecular function | 4   | 2  | 0.05  | 40.74 | 0.0339 | guanylate cyclase regulator activity                 | GO:0030249 |
| molecular function | 40  | 4  | 0.49  | 8.15  | 0.0424 | receptor regulator activity                          | GO:0030545 |
| molecular function | 5   | 2  | 0.06  | 32.59 | 0.0424 | protein-glutamine gamma-glutamyltransferase activity | GO:0003810 |

### Enrichment for GO terms in genes down-regulated after 3 days of ETC-159 treatment

| GO category        | Genes in the category (C) | Genes in the gene set (O) | Expected number (E) | Ratio of enrichment (R) | Adjusted P-value | GO term name                                      | GO term    |
|--------------------|---------------------------|---------------------------|---------------------|-------------------------|------------------|---------------------------------------------------|------------|
| biological process | 995                       | 183                       | 49.28               | 3.71                    | 1.73E-57         | cell cycle process                                | GO:0022402 |
| biological process | 746                       | 153                       | 36.95               | 4.14                    | 2.46E-53         | mitotic cell cycle                                | GO:0000278 |
| biological process | 1301                      | 198                       | 64.43               | 3.07                    | 2.81E-49         | cell cycle                                        | GO:0007049 |
| biological process | 499                       | 119                       | 24.71               | 4.82                    | 1.13E-47         | M phase                                           | GO:0000279 |
| biological process | 365                       | 96                        | 18.08               | 5.31                    | 9.94E-42         | M phase of mitotic cell cycle                     | GO:0000087 |
| biological process | 356                       | 94                        | 17.63               | 5.33                    | 4.52E-41         | nuclear division                                  | GO:0000280 |
| biological process | 356                       | 94                        | 17.63               | 5.33                    | 4.52E-41         | mitosis                                           | GO:0007067 |
| biological process | 379                       | 96                        | 18.77               | 5.11                    | 2.34E-40         | organelle fission                                 | GO:0048285 |
| biological process | 786                       | 129                       | 38.93               | 3.31                    | 1.56E-33         | DNA metabolic process                             | GO:0006259 |
| biological process | 408                       | 83                        | 20.21               | 4.11                    | 3.50E-27         | regulation of cell cycle process                  | GO:0010564 |
| biological process | 437                       | 85                        | 21.64               | 3.93                    | 1.86E-26         | cell division                                     | GO:0051301 |
| biological process | 140                       | 48                        | 6.93                | 6.92                    | 8.30E-26         | chromosome segregation                            | GO:0007059 |
| biological process | 253                       | 63                        | 12.53               | 5.03                    | 2.08E-25         | DNA replication                                   | GO:0006260 |
| biological process | 259                       | 60                        | 12.83               | 4.68                    | 2.30E-22         | regulation of cell cycle arrest                   | GO:0071156 |
| biological process | 237                       | 56                        | 11.74               | 4.77                    | 2.92E-21         | cell cycle checkpoint                             | GO:0000075 |
| biological process | 687                       | 100                       | 34.02               | 2.94                    | 2.95E-21         | regulation of cell cycle                          | GO:0051726 |
| biological process | 392                       | 72                        | 19.41               | 3.71                    | 1.02E-20         | interphase                                        | GO:0051325 |
| biological process | 386                       | 71                        | 19.12               | 3.71                    | 1.80E-20         | interphase of mitotic cell cycle                  | GO:0051329 |
| biological process | 366                       | 68                        | 18.13               | 3.75                    | 8.10E-20         | cell cycle arrest                                 | GO:0007050 |
| biological process | 84                        | 32                        | 4.16                | 7.69                    | 1.20E-18         | mitotic prometaphase                              | GO:0000236 |
| biological process | 427                       | 71                        | 21.15               | 3.36                    | 6.32E-18         | negative regulation of cell cycle                 | GO:0045786 |
| biological process | 35                        | 21                        | 1.73                | 12.12                   | 3.44E-17         | DNA strand elongation                             | GO:0022616 |
| biological process | 32                        | 20                        | 1.58                | 12.62                   | 7.34E-17         | DNA strand elongation involved in DNA replication | GO:0006271 |
| biological process | 627                       | 86                        | 31.05               | 2.77                    | 1.82E-16         | chromosome organization                           | GO:0051276 |
| biological process | 92                        | 31                        | 4.56                | 6.8                     | 2.55E-16         | DNA-dependent DNA replication                     | GO:0006261 |
| biological process | 393                       | 65                        | 19.46               | 3.34                    | 2.89E-16         | microtubule-based process                         | GO:0007017 |
| biological process | 385                       | 63                        | 19.07               | 3.3                     | 1.66E-15         | DNA repair                                        | GO:0006281 |
| biological process | 1949                      | 176                       | 96.52               | 1.82                    | 3.86E-15         | organelle organization                            | GO:0006996 |
| biological process | 53                        | 23                        | 2.62                | 8.76                    | 7.66E-15         | sister chromatid segregation                      | GO:0000819 |
| biological process | 50                        | 22                        | 2.48                | 8.88                    | 2.42E-14         | mitotic sister chromatid segregation              | GO:0000070 |
| biological process | 265                       | 48                        | 13.12               | 3.66                    | 2.12E-13         | microtubule cytoskeleton organization             | GO:0000226 |
| biological process | 82                        | 26                        | 4.06                | 6.4                     | 5.93E-13         | spindle organization                              | GO:0007051 |
| biological process | 154                       | 35                        | 7.63                | 4.59                    | 1.15E-12         | DNA conformation change                           | GO:0071103 |

|                    |      |     |        |       |          |                                              |            |
|--------------------|------|-----|--------|-------|----------|----------------------------------------------|------------|
| biological process | 194  | 39  | 9.61   | 4.06  | 2.55E-12 | DNA recombination                            | GO:0006310 |
| biological process | 143  | 33  | 7.08   | 4.66  | 3.89E-12 | S phase                                      | GO:0051320 |
| biological process | 583  | 73  | 28.87  | 2.53  | 7.61E-12 | response to DNA damage stimulus              | GO:0006974 |
| biological process | 294  | 48  | 14.56  | 3.3   | 1.09E-11 | regulation of mitotic cell cycle             | GO:0007346 |
| biological process | 119  | 28  | 5.89   | 4.75  | 1.79E-10 | DNA packaging                                | GO:0006323 |
| biological process | 33   | 15  | 1.63   | 9.18  | 5.93E-10 | centromere complex assembly                  | GO:0034508 |
| cellular component | 577  | 103 | 27.04  | 3.81  | 6.38E-31 | chromosome                                   | GO:0005694 |
| cellular component | 487  | 90  | 22.82  | 3.94  | 3.85E-28 | chromosomal part                             | GO:0044427 |
| cellular component | 162  | 50  | 7.59   | 6.59  | 8.60E-26 | condensed chromosome                         | GO:0000793 |
| cellular component | 145  | 44  | 6.8    | 6.47  | 2.30E-22 | chromosome, centromeric region               | GO:0000775 |
| cellular component | 85   | 34  | 3.98   | 8.53  | 1.10E-21 | condensed chromosome, centromeric region     | GO:0000779 |
| cellular component | 80   | 33  | 3.75   | 8.8   | 1.27E-21 | condensed chromosome kinetochore             | GO:0000777 |
| cellular component | 101  | 36  | 4.73   | 7.61  | 4.18E-21 | kinetochore                                  | GO:0000776 |
| cellular component | 226  | 49  | 10.59  | 4.63  | 2.78E-18 | spindle                                      | GO:0005819 |
| cellular component | 814  | 93  | 38.15  | 2.44  | 1.55E-14 | microtubule cytoskeleton                     | GO:0015630 |
| cellular component | 3414 | 250 | 160.01 | 1.56  | 1.90E-14 | non-membrane-bounded organelle               | GO:0043228 |
| cellular component | 3414 | 250 | 160.01 | 1.56  | 1.90E-14 | intracellular non-membrane-bounded organelle | GO:0043232 |
| cellular component | 2858 | 214 | 133.95 | 1.6   | 8.47E-13 | nuclear part                                 | GO:0044428 |
| cellular component | 2553 | 194 | 119.65 | 1.62  | 5.95E-12 | nuclear lumen                                | GO:0031981 |
| cellular component | 5263 | 333 | 246.67 | 1.35  | 2.20E-11 | nucleus                                      | GO:0005634 |
| cellular component | 3054 | 219 | 143.14 | 1.53  | 2.98E-11 | intracellular organelle lumen                | GO:0070013 |
| cellular component | 3092 | 220 | 144.92 | 1.52  | 5.45E-11 | organelle lumen                              | GO:0043233 |
| cellular component | 3135 | 222 | 146.93 | 1.51  | 6.25E-11 | membrane-enclosed lumen                      | GO:0031974 |
| cellular component | 93   | 24  | 4.36   | 5.51  | 7.29E-11 | spindle pole                                 | GO:0000922 |
| cellular component | 1093 | 101 | 51.23  | 1.97  | 2.77E-10 | cytoskeletal part                            | GO:0044430 |
| cellular component | 1383 | 119 | 64.82  | 1.84  | 3.39E-10 | nucleoplasm                                  | GO:0005654 |
| cellular component | 265  | 39  | 12.42  | 3.14  | 2.65E-09 | nuclear chromosome                           | GO:0000228 |
| cellular component | 463  | 53  | 21.7   | 2.44  | 1.97E-08 | microtubule organizing center                | GO:0005815 |
| cellular component | 6063 | 357 | 284.16 | 1.26  | 3.03E-08 | intracellular organelle part                 | GO:0044446 |
| cellular component | 11   | 8   | 0.52   | 15.52 | 4.13E-08 | MCM complex                                  | GO:0042555 |
| cellular component | 42   | 14  | 1.97   | 7.11  | 4.13E-08 | spindle microtubule                          | GO:0005876 |
| cellular component | 6135 | 359 | 287.54 | 1.25  | 5.30E-08 | organelle part                               | GO:0044422 |
| cellular component | 360  | 44  | 16.87  | 2.61  | 5.82E-08 | centrosome                                   | GO:0005813 |
| cellular component | 12   | 8   | 0.56   | 14.22 | 1.03E-07 | condensed chromosome outer kinetochore       | GO:0000940 |
| cellular component | 46   | 14  | 2.16   | 6.49  | 1.36E-07 | replication fork                             | GO:0005657 |
| cellular component | 223  | 32  | 10.45  | 3.06  | 1.54E-07 | nuclear chromosome part                      | GO:0044454 |

|                    |      |     |        |       |          |                                                                              |            |
|--------------------|------|-----|--------|-------|----------|------------------------------------------------------------------------------|------------|
| cellular component | 313  | 39  | 14.67  | 2.66  | 2.27E-07 | microtubule                                                                  | GO:0005874 |
| cellular component | 1542 | 117 | 72.27  | 1.62  | 5.93E-07 | cytoskeleton                                                                 | GO:0005856 |
| cellular component | 60   | 15  | 2.81   | 5.33  | 6.84E-07 | condensed nuclear chromosome                                                 | GO:0000794 |
| cellular component | 12   | 7   | 0.56   | 12.45 | 2.81E-06 | condensed nuclear chromosome, centromeric region                             | GO:0000780 |
| cellular component | 6    | 5   | 0.28   | 17.78 | 1.14E-05 | condensin complex                                                            | GO:0000796 |
| cellular component | 264  | 31  | 12.37  | 2.51  | 1.98E-05 | chromatin                                                                    | GO:0000785 |
| cellular component | 4    | 4   | 0.19   | 21.34 | 3.98E-05 | condensed nuclear chromosome kinetochore                                     | GO:0000778 |
| cellular component | 56   | 12  | 2.62   | 4.57  | 6.88E-05 | centriole                                                                    | GO:0005814 |
| cellular component | 9335 | 485 | 437.51 | 1.11  | 0.0001   | organelle                                                                    | GO:0043226 |
| cellular component | 9326 | 484 | 437.09 | 1.11  | 0.0001   | intracellular organelle                                                      | GO:0043229 |
| molecular function | 69   | 17  | 3.28   | 5.19  | 4.29E-06 | DNA-dependent ATPase activity                                                | GO:0008094 |
| molecular function | 70   | 17  | 3.32   | 5.11  | 4.29E-06 | microtubule motor activity                                                   | GO:0003777 |
| molecular function | 1358 | 107 | 64.49  | 1.66  | 9.33E-06 | ATP binding                                                                  | GO:0005524 |
| molecular function | 1386 | 107 | 65.82  | 1.63  | 1.84E-05 | adenyl ribonucleotide binding                                                | GO:0032559 |
| molecular function | 1390 | 107 | 66.01  | 1.62  | 1.84E-05 | adenyl nucleotide binding                                                    | GO:0030554 |
| molecular function | 165  | 23  | 7.84   | 2.94  | 0.0002   | structure-specific DNA binding                                               | GO:0043566 |
| molecular function | 118  | 18  | 5.6    | 3.21  | 0.0007   | motor activity                                                               | GO:0003774 |
| molecular function | 5    | 4   | 0.24   | 16.85 | 0.0012   | ribonuclease H activity                                                      | GO:0004523 |
| molecular function | 5    | 4   | 0.24   | 16.85 | 0.0012   | single-stranded DNA-dependent ATPase activity                                | GO:0043142 |
| molecular function | 1930 | 128 | 91.65  | 1.4   | 0.0014   | DNA binding                                                                  | GO:0003677 |
| molecular function | 293  | 30  | 13.91  | 2.16  | 0.0024   | chromatin binding                                                            | GO:0003682 |
| molecular function | 699  | 56  | 33.19  | 1.69  | 0.0024   | nucleoside-triphosphatase activity                                           | GO:0017111 |
| molecular function | 12   | 5   | 0.57   | 8.77  | 0.0024   | histone kinase activity                                                      | GO:0035173 |
| molecular function | 142  | 18  | 6.74   | 2.67  | 0.0024   | helicase activity                                                            | GO:0004386 |
| molecular function | 1680 | 111 | 79.78  | 1.39  | 0.0024   | ribonucleoside binding                                                       | GO:0032549 |
| molecular function | 1690 | 112 | 80.26  | 1.4   | 0.0024   | nucleoside binding                                                           | GO:0001882 |
| molecular function | 61   | 11  | 2.9    | 3.8   | 0.0024   | single-stranded DNA binding                                                  | GO:0003697 |
| molecular function | 730  | 57  | 34.67  | 1.64  | 0.0024   | pyrophosphatase activity                                                     | GO:0016462 |
| molecular function | 733  | 57  | 34.81  | 1.64  | 0.0024   | hydrolase activity, acting on acid anhydrides, in phosphorus-containing anhy | GO:0016818 |
| molecular function | 158  | 19  | 7.5    | 2.53  | 0.0038   | nuclease activity                                                            | GO:0004518 |
| molecular function | 1667 | 110 | 79.16  | 1.39  | 0.0038   | purine ribonucleoside triphosphate binding                                   | GO:0035639 |
| molecular function | 1676 | 110 | 79.59  | 1.38  | 0.0038   | purine ribonucleoside binding                                                | GO:0032550 |
| molecular function | 1679 | 110 | 79.73  | 1.38  | 0.0038   | purine nucleoside binding                                                    | GO:0001883 |
| molecular function | 738  | 57  | 35.05  | 1.63  | 0.0038   | hydrolase activity, acting on acid anhydrides                                | GO:0016817 |
| molecular function | 1698 | 110 | 80.64  | 1.36  | 0.0052   | purine ribonucleotide binding                                                | GO:0032555 |
| molecular function | 1705 | 111 | 80.97  | 1.37  | 0.0052   | purine nucleotide binding                                                    | GO:0017076 |

|                    |      |     |        |       |        |                                                                         |            |
|--------------------|------|-----|--------|-------|--------|-------------------------------------------------------------------------|------------|
| molecular function | 1709 | 110 | 81.16  | 1.36  | 0.0065 | ribonucleotide binding                                                  | GO:0032553 |
| molecular function | 48   | 9   | 2.28   | 3.95  | 0.0065 | damaged DNA binding                                                     | GO:0003684 |
| molecular function | 43   | 8   | 2.04   | 3.92  | 0.0125 | DNA helicase activity                                                   | GO:0003678 |
| molecular function | 329  | 29  | 15.62  | 1.86  | 0.0151 | ATPase activity                                                         | GO:0016887 |
| molecular function | 12   | 4   | 0.57   | 7.02  | 0.0262 | DNA N-glycosylase activity                                              | GO:0019104 |
| molecular function | 2    | 2   | 0.09   | 21.06 | 0.0276 | double-stranded DNA specific exodeoxyribonuclease activity              | GO:0008309 |
| molecular function | 2    | 2   | 0.09   | 21.06 | 0.0276 | H3 histone acetyltransferase activity                                   | GO:0010484 |
| molecular function | 2    | 2   | 0.09   | 21.06 | 0.0276 | site-specific endodeoxyribonuclease activity, specific for altered base | GO:0016890 |
| molecular function | 2    | 2   | 0.09   | 21.06 | 0.0276 | CD8 receptor binding                                                    | GO:0042610 |
| molecular function | 2138 | 128 | 101.53 | 1.26  | 0.0276 | anion binding                                                           | GO:0043168 |
| molecular function | 30   | 6   | 1.42   | 4.21  | 0.0276 | ATP-dependent DNA helicase activity                                     | GO:0004003 |
| molecular function | 40   | 7   | 1.9    | 3.69  | 0.0276 | deoxyribonuclease activity                                              | GO:0004536 |
| molecular function | 62   | 9   | 2.94   | 3.06  | 0.0276 | exonuclease activity                                                    | GO:0004527 |
| molecular function | 62   | 9   | 2.94   | 3.06  | 0.0276 | ribonuclease activity                                                   | GO:0004540 |
