# Supplementary material
Source: PubMed Central journal article supplement (PMC4855076)
Supplement: onc2015280x5.pdf [file onc2015280x5.pdf]

Supplementary Table 4:

|               |                                     |
|---------------|-------------------------------------|
| <i>Axin2</i>  | Fw: 5'-CTCCCCACCTTGAATGAAGA-3'      |
|               | Rev: 5'-TGGCTGGTGCAAAGACATAG-3'     |
| <i>cMyc</i>   | Fw: 5'-TGCCCGCGATCAGCTCTCCT-3'      |
|               | Rev: 5'-GGGGCATCGTCGTGGCTGTC-3'     |
| <i>Ccdn</i>   | Fw: 5'-CGCTCTGTGCGCTACCGACTT-3'     |
|               | Rev: 5'-GGCTGCTCCCACGCTTCCAG-3'     |
| <i>Actb</i>   | Fw: 5'-TGCAGCTCCTTCGTTGCCGG-3'      |
|               | Rev: 5'-TCACACCCTGGTGCCTAGGGC-3'    |
| <i>MUC2</i>   | Fw: 5'-CCATCAAGGATGACACCATCTAC-3'   |
|               | Rev: 5'-CGGGAGTAGACTTTGGTGTAGG-3'   |
| <i>MUC4</i>   | Fw: 5'-ATTCCAACCCGTCAGCATAG-3'      |
|               | Rev: 5'-CAGCCTTCACGAAACTCTCC-3'     |
| <i>MUC20</i>  | Fw: 5'-TTCACCCCTTCAGAGACACC-3'      |
|               | Rev: 5'-TCGCTGAGGTTGTGATCTTG-3'     |
| <i>MUC5B</i>  | Fw: 5'-TCCAATATGAGTGCGAGTGC-3'      |
|               | Rev: 5'-AGCGTGCATGGATCTCTCTC-3'     |
| <i>MUC5AC</i> | Fw: 5'-CAAGATGTGCCTCAACTACGAG-3'    |
|               | Rev: 5'-TAGACAGGGAAGGATACAGAGC-3'   |
| <i>Hprt</i>   | Fw: 5'-CCTCACTGCTTTCCGGAGCGG -3'    |
|               | Rev: 5'- ATCGCTAATCACGACGCTGGGA -3' |
